# Supplementary material for: UBP12 and UBP13 negatively regulate the activity of the ubiquitin-dependent peptidases DA1, DAR1 and DAR2
Source: eLife. 2020 Mar 25;9:e52276. doi: 10.7554/eLife.52276 (PMC7141810; doi:10.7554/eLife.52276)
Supplement: Figure 1—source data 1. [file elife-52276-fig1-data1.xlsx]

## Sheet: F1A_DA1 interactors
Significant	-LOG(P-value)	Difference	Majority protein IDs	Leading protein ID	Protein description	Peptides	Razor + unique peptides	Unique peptides	Sequence coverage [%]	Unique + razor sequence coverage [%]	Unique sequence coverage [%]	Mol. weight [kDa]	Q-value	Score	Intensity	MS/MS count	LFQ intensity CT-rep1	LFQ intensity CT-rep2	LFQ intensity CT-rep3	LFQ intensity DA1-rep1	LFQ intensity DA1-rep2	LFQ intensity DA1-rep3
+	5.122	9.06372	PSB_N_GS_green;PSB_N_GFP;PSB_C_GFP;PSB_N_GS_yellow;PSB_C_GS_green;PSB_C_GS_yellow;P42212;Q9U6Y5	GFP	GFP	29	29	29	62.8	62.8	62.8	36.921	0	323.31	39857000000	275	23.5687	23.2995	23.1535	32.1088	32.9615	32.1426
+	4.34152	6.11871	AT1G19270.1	AT1G19270	DA1	15	15	15	38.9	38.9	38.9	60.364	0	323.31	22870000000	233	25.2737	25.0162	26.0723	31.5031	31.6811	31.534
+	3.82912	4.61439	AT3G11910.2;AT3G11910.1	AT3G11910	UBP13	14	14	6	16.6	16.6	7.6	130.52	0	103.99	165870000	12	20.6745	19.5668	19.9093	24.6836	24.6851	24.6251
+	3.82983	4.50797	AT5G51110.2;AT5G51110.1	AT5G51110	Transcriptional coactivator/pterin dehydratase	2	2	2	15	15	15	20.908	0	20.93	130590000	3	19.6664	19.9274	19.8451	23.7025	24.5736	24.6867
+	3.06112	3.8636	AT3G12915.1	AT3G12915	Ribosomal protein S5/Elongation factor G/III/V family protein	10	1	1	15.4	1	1	90.994	0	6.8919	58229000	3	18.5891	19.9095	19.4142	22.7829	23.2879	23.4329
+	1.74809	3.81185	AT3G47470.1	AT3G47470	LHCA4, CAB4 | light-harvesting chlorophyll-protein complex I subunit A4	4	4	4	29.5	29.5	29.5	27.733	0	32.026	173760000	9	22.5987	20.2267	19.5072	24.5896	25.1189	24.0596
+	2.57963	3.75596	AT5G06600.2;AT5G06600.1;AT5G06600.3	AT5G06600	UBP12	12	4	4	15	6	6	130.48	0	38.507	104670000	5	21.3379	19.7534	19.6344	23.751	24.1722	24.0704
+	3.00227	3.27012	AT4G27170.1	AT4G27170	SESA4, AT2S4 | seed storage albumin 4	2	2	2	12.7	12.7	12.7	19.169	0	13.469	66794000	3	20.4186	19.6858	19.7426	23.7911	23.0742	22.792
+	2.27712	3.26653	AT1G55670.1	AT1G55670	PSAG | photosystem I subunit G	1	1	1	5.6	5.6	5.6	17.085	0	7.0577	37837000	3	20.3686	18.8926	18.5774	22.1163	22.7794	22.7426
+	2.36302	3.09689	AT3G18190.1	AT3G18190	TCP-1/cpn60 chaperonin family protein	2	2	2	7.6	7.6	7.6	57.775	0	13.517	46798000	8	20.1376	18.6817	20.2838	22.9639	22.9236	22.5062
+	3.39064	3.09281	AT3G52140.3;AT3G52140.1;AT3G52140.2;AT3G52140.4	AT3G52140	tetratricopeptide repeat (TPR)-containing protein	2	2	2	1.7	1.7	1.7	152.52	0	13.646	39102000	3	19.0041	19.4311	19.9105	22.7593	22.4742	22.3907
+	3.53253	3.06022	AT1G16890.1;AT1G78870.2;AT1G16890.2;AT1G16890.3;AT1G78870.3;AT1G78870.1	AT1G16890	UBC36, UBC13B | ubiquitin-conjugating enzyme 36	2	2	2	37.5	37.5	37.5	13.631	0	11.854	51323000	3	20.1002	20.1307	19.4412	22.8445	22.802	23.2064
+	3.45306	3.04399	AT4G39520.1	AT4G39520	GTP-binding protein-related	1	1	1	3.8	3.8	3.8	41.143	0.0025031	6.5634	33318000	2	19.7977	19.215	18.9145	22.2463	22.315	22.4979
+	2.50961	3.04265	AT3G02260.1	AT3G02260	BIG, DOC1, TIR3, UMB1, ASA1, LPR1, CRM1 | auxin transport protein (BIG)	3	3	3	0.8	0.8	0.8	567.88	0	18.393	66924000	3	20.0503	20.7812	19.9513	22.9807	22.8339	24.096
+	2.03758	3.03713	AT3G13160.1	AT3G13160	Tetratricopeptide repeat (TPR)-like superfamily protein	2	2	2	8.4	8.4	8.4	44.927	0	19.989	35096000	4	20.0974	18.0126	19.7131	22.1922	22.3502	22.392
+	1.88037	3.02133	AT3G61470.1	AT3G61470	LHCA2 | photosystem I light harvesting complex gene 2	2	2	2	16.7	16.7	16.7	27.755	0	17.798	68102000	6	19.871	19.2657	21.5343	23.1519	23.6529	22.9301
+	3.48224	2.8525	AT1G02150.1	AT1G02150	Tetratricopeptide repeat (TPR)-like superfamily protein	1	1	1	3.2	3.2	3.2	59.882	0	12.284	27997000	2	19.6077	18.9565	19.1034	22.111	22.3174	21.7966
+	2.47254	2.65865	AT3G19130.1;AT1G49600.1;AT1G47490.2;AT1G47490.1;AT1G47500.1	AT3G19130	ATRBP47B, RBP47B | RNA-binding protein 47B	2	2	2	3.7	3.7	3.7	48.118	0	10.756	38217000	2	19.7018	20.6262	19.2996	22.2038	22.6761	22.7237
+	3.12331	2.64034	AT5G35620.2;AT5G35620.1	AT5G35620	LSP1, EIF(ISO)4E, LSP, EIF4E2, eIFiso4E | Eukaryotic initiation factor 4E protein	1	1	1	13.2	13.2	13.2	18.823	0	10.096	49435000	3	20.412	20.2251	19.944	23.1605	22.3423	22.9993
+	1.96161	2.61002	AT3G48870.2;AT3G48870.1	AT3G48870	HSP93-III | Clp ATPase	16	1	1	23.7	1.8	1.8	102.24	0	14.791	44902000	3	19.7464	19.2512	21.1837	22.5948	22.7612	22.6555
+	4.17189	2.51599	AT4G39980.1	AT4G39980	DHS1 | 3-deoxy-D-arabino-heptulosonate 7-phosphate synthase 1	2	1	1	4.2	2.9	2.9	57.978	0	7.3849	24997000	1	19.3888	19.4885	19.3704	21.8204	21.7618	22.2134
+	2.42388	2.43584	AT5G60600.2;AT5G60600.1;AT5G60600.3	AT5G60600	GCPE, ISPG, CSB3, CLB4, HDS | 4-hydroxy-3-methylbut-2-enyl diphosphate synthase	2	2	2	3.9	3.9	3.9	82.156	0	18.865	39367000	3	20.8512	19.8831	19.5397	22.6723	22.3646	22.5447
+	2.42433	2.35067	ATCG00670.1	ATCG00670	CLPP1, PCLPP | plastid-encoded CLP P	1	1	1	13.8	13.8	13.8	22.097	0	8.2007	28135000	3	20.1959	18.9981	20.0291	22.1088	22.261	21.9053
+	3.16842	2.32138	AT1G53750.1	AT1G53750	RPT1A | regulatory particle triple-A 1A	6	6	6	15.7	15.7	15.7	47.803	0	53.569	272050000	12	22.4417	23.1811	22.91	25.1195	25.3803	24.9971
+	3.45659	2.28626	AT1G61520.2;AT1G61520.3;AT1G61520.1	AT1G61520	LHCA3 | photosystem I light harvesting complex gene 3	3	3	3	16.5	16.5	16.5	23.746	0	25.125	205670000	8	22.7846	22.5149	22.2693	24.5556	25.0261	24.8459
+	2.70899	2.2321	AT1G78570.1	AT1G78570	RHM1, ROL1, ATRHM1 | rhamnose biosynthesis 1	8	8	7	15.7	15.7	13	75.371	0	49.771	237870000	10	23.1147	22.8046	22.1918	25.1171	25.0493	24.641
+	3.30241	2.19845	AT1G15820.1	AT1G15820	LHCB6, CP24 | light harvesting complex photosystem II subunit 6	3	3	3	20.9	20.9	20.9	27.522	0	20.628	167700000	6	22.5736	22.4252	21.8962	24.3915	24.5148	24.5839
+	3.73503	2.15933	AT4G27500.1	AT4G27500	PPI1 | proton pump interactor 1	1	1	1	1.8	1.8	1.8	68.878	0.0025157	6.6133	24882000	3	19.3465	19.6604	19.83	21.6171	21.8778	21.8201
+	3.1346	2.03413	AT3G44110.2;AT3G44110.1	AT3G44110	ATJ3, ATJ | DNAJ homologue 3	4	4	4	19.8	19.8	19.8	37.674	0	30.925	269250000	12	23.1661	23.3738	22.6646	25.0688	25.0258	25.2123
+	3.67681	1.99023	AT5G65010.1;AT5G65010.2	AT5G65010	ASN2 | asparagine synthetase 2	15	15	15	43.3	43.3	43.3	65.029	0	183.21	1554500000	47	25.9052	25.7188	25.4173	27.5489	27.7365	27.7267
+	3.69071	1.98518	AT5G16070.1;AT3G02530.1	AT5G16070	TCP-1/cpn60 chaperonin family protein	3	3	3	6.4	6.4	6.4	58.927	0	20.229	180690000	5	22.2789	22.7588	22.6979	24.5447	24.5314	24.6149
+	4.67689	1.78191	AT4G27440.2;AT4G27440.1;AT5G54190.1	AT4G27440	PORB | protochlorophyllide oxidoreductase B	8	8	8	21.2	21.2	21.2	43.359	0	78.125	1003400000	23	25.2328	25.3594	25.0968	26.9821	27.0337	27.0189

## Sheet: F1B_DAR1 interactors
Significant	-LOG(P-value)	Difference	Majority protein IDs	Leading protein ID	Protein description	Peptides	Razor + unique peptides	Unique peptides	Sequence coverage [%]	Unique + razor sequence coverage [%]	Unique sequence coverage [%]	Mol. weight [kDa]	Q-value	Score	Intensity	MS/MS count	LFQ intensity DAR1_rep1	LFQ intensity DAR1_rep2	LFQ intensity DAR1_rep3	LFQ intensity WT_rep1	LFQ intensity WT_rep2	LFQ intensity WT_rep3
+	4.27362	14.6176	AT4G36860.1	AT4G36860	DAR1	26	26	25	36.5	36.5	35.3	63.308	0	323.31	109130000000	115	31.9989	33.6411	34.2006	18.9988	17.7633	19.2256
+	3.83715	7.37085	AT1G61520.2;AT1G61520.3;AT1G61520.1	AT1G61520	LHCA3 | photosystem I light harvesting complex gene 3	2	2	2	11.5	11.5	11.5	23.746	0	19.973	716050000	4	25.4739	25.5636	26.9244	18.2054	18.9911	18.653
+	2.81064	7.02714	AT5G23060.1	AT5G23060	CaS | calcium sensing receptor	2	2	2	8.5	8.5	8.5	41.285	0	11.088	636530000	3	24.9269	24.5655	27.3985	18.4599	18.3295	19.0201
+	2.64526	6.8419	AT5G06600.2;AT5G06600.1;AT5G06600.3	AT5G06600	UBP12	16	16	8	16.5	16.5	7.7	130.48	0	102.9	740410000	15	26.6555	27.5584	25.2341	21.0348	18.6525	19.235
+	2.83956	6.67292	AT5G47990.1	AT5G47990	CYP705A5, THAD, THAD1 | cytochrome P450, family 705, subfamily A, polypeptide 5	10	10	8	25.2	25.2	21.7	58.44	0	64.194	965760000	12	27.1756	25.1514	26.9259	20.1001	18.632	20.5021
+	3.29806	6.49874	AT5G57870.2;AT5G57870.1	AT5G57870	eIFiso4G1 | MIF4G domain-containing protein / MA3 domain-containing protein	4	4	4	7.1	7.1	7.1	85.157	0	64.453	414580000	8	25.0662	25.3818	25.6285	19.1723	17.682	19.726
+	2.87976	6.47403	AT5G01530.1	AT5G01530	LHCB4.1 | light harvesting complex photosystem II	3	3	3	11	11	11	31.139	0	19.331	303360000	5	23.381	24.9152	25.1749	17.0061	19.0269	18.016
+	3.77841	6.34261	AT5G54160.1	AT5G54160	ATOMT1, OMT1 | O-methyltransferase 1	2	2	2	6.9	6.9	6.9	39.618	0	16.25	274720000	4	25.1723	24.1415	23.7031	17.7782	18.3119	17.899
+	1.83357	6.27261	AT5G38420.1;AT5G38410.1;AT5G38410.3;AT5G38410.2	AT5G38420	Ribulose bisphosphate carboxylase (small chain) family protein	5	5	2	24.9	24.9	9.9	20.35	0	37.258	1995400000	6	26.5364	26.7125	27.8032	23.5713	20.0438	18.6192
+	2.15027	6.09174	AT3G47470.1	AT3G47470	LHCA4, CAB4 | light-harvesting chlorophyll-protein complex I subunit A4	4	4	4	31.9	31.9	31.9	27.733	0	55.22	568080000	8	25.0379	25.388	26.8738	19.3385	18.0328	21.6532
+	2.4501	5.98391	AT5G20000.1;AT5G19990.1	AT5G20000	AAA-type ATPase family protein	3	2	2	10.5	7.6	7.6	47.156	0	27.458	240710000	4	24.105	22.8	26.0272	18.0561	18.8499	18.0745
+	3.04566	5.71059	AT1G07890.6;AT1G07890.8;AT1G07890.7;AT1G07890.5;AT1G07890.4;AT1G07890.3;AT1G07890.2;AT1G07890.1	AT1G07890	APX1, MEE6, CS1, ATAPX1, ATAPX01 | ascorbate peroxidase 1	2	2	2	9.6	9.6	9.6	27.52	0	16.534	318820000	4	24.7787	24.5953	25.8034	18.5807	20.3514	19.1135
+	1.33456	5.69424	AT2G21390.1	AT2G21390	Coatomer, alpha subunit	15	15	6	16.3	16.3	8.5	136.47	0	140.87	963890000	10	25.4853	25.6079	27.5579	18.8803	24.2733	18.4148
+	2.66205	5.64699	AT4G11380.1;AT4G11380.2;AT4G23460.1	AT4G11380	Adaptin family protein	4	4	4	7.2	7.2	7.2	99.371	0	27.345	272670000	5	23.5301	23.9484	25.0459	17.6101	18.1495	19.8238
+	3.32796	5.64284	AT5G42220.1	AT5G42220	Ubiquitin-like superfamily protein	2	2	2	4.4	4.4	4.4	92.553	0	14.773	130780000	4	23.3295	23.4635	24.3968	17.6036	18.9269	17.7308
+	2.08434	5.63681	AT3G02260.1	AT3G02260	BIG, DOC1, TIR3, UMB1, ASA1, LPR1, CRM1 | auxin transport protein (BIG)	10	10	10	2.7	2.7	2.7	567.88	0	95.395	554260000	21	24.5532	25.2785	26.9663	21.6575	18.5357	19.6944
+	2.11374	5.60815	AT3G13330.1	AT3G13330	PA200 | proteasome activating protein 200	2	2	2	1.2	1.2	1.2	203.62	0	12.989	1267200000	7	23.4372	23.2243	26.7098	18.7762	18.7798	18.9907
+	2.17267	5.56867	AT3G58510.3;AT3G58510.2;AT3G58510.1	AT3G58510	DEA(D/H)-box RNA helicase family protein	6	6	3	10.3	10.3	5.6	66.025	0	42.597	262020000	4	23.7461	24.2928	25.7722	17.3713	19.2965	20.4374
+	3.15287	5.53864	AT1G80480.1;AT1G15730.1	AT1G80480	PTAC17 | plastid transcriptionally active 17	1	1	1	3.2	3.2	3.2	49.487	0	14.309	219810000	3	24.2839	23.7481	25.2631	19.0391	18.1662	19.4737
+	1.8397	5.49575	AT1G56330.1;AT4G02080.1;AT3G62560.1;AT1G09180.1	AT1G56330	SAR1, ATSAR1, ATSARA1B, ATSAR1B, SAR1B | secretion-associated RAS 1B	2	2	2	17.6	17.6	17.6	21.986	0	11.548	151640000	2	23.0489	23.3652	25.0549	16.7314	20.6193	17.6311
+	1.55631	5.42099	AT4G14960.2;AT1G50010.1;AT1G04820.1;AT4G14960.1	AT4G14960	TUA6 | Tubulin/FtsZ family protein	10	10	4	29.3	29.3	15.8	49.537	0	323.31	4564000000	13	27.8697	27.3382	29.7399	24.1972	24.4466	20.041
+	4.69627	5.37552	AT3G28715.1;AT3G28710.1	AT3G28715	ATPase, V0/A0 complex, subunit C/D	1	1	1	5.7	5.7	5.7	40.787	0	22.243	226910000	3	24.5996	24.8831	24.7734	19.7951	19.256	19.0784
+	2.02357	5.35025	AT3G11130.1	AT3G11130	Clathrin, heavy chain	39	4	4	31.5	4	4	193.24	0	58.385	969970000	12	26.3988	25.721	27.7231	23.0514	19.6677	21.0729
+	2.33045	5.31872	AT2G20990.1;AT2G20990.2;AT2G20990.3	AT2G20990	SYTA, NTMC2TYPE1.1, ATSYTA, NTMC2T1.1, SYT1 | synaptotagmin A	3	3	3	8.5	8.5	8.5	61.743	0	44.385	194110000	3	23.8039	23.2213	25.7759	17.9872	19.781	19.0767
+	3.4494	5.22296	AT4G31500.1	AT4G31500	CYP83B1, SUR2, RNT1, RED1, ATR4 | cytochrome P450, family 83, subfamily B, polypeptide 1	2	2	2	6.2	6.2	6.2	56.846	0	44.856	120290000	3	24.0731	22.8352	23.6685	18.3886	18.7519	17.7673
+	2.12286	5.16888	AT5G42590.1	AT5G42590	CYP71A16 | cytochrome P450, family 71, subfamily A, polypeptide 16	12	12	12	37.4	37.4	37.4	55.627	0	120.55	1861300000	24	27.8342	25.0622	28.2938	21.8209	22.3272	21.5354
+	2.43683	5.04122	AT1G62020.1	AT1G62020	Coatomer, alpha subunit	10	1	1	9.3	1.4	1.4	136.56	0	57.375	133250000	4	23.3503	22.281	24.8263	19.1764	17.9564	18.2013
+	2.09572	5.03503	AT1G67730.1	AT1G67730	YBR159, KCR1, ATKCR1 | beta-ketoacyl reductase 1	3	3	3	10.4	10.4	10.4	35.761	0	17.648	129280000	5	21.8141	22.4485	25.1572	18.0378	18.0558	18.2211
+	2.44043	4.8609	AT3G42050.1	AT3G42050	vacuolar ATP synthase subunit H family protein	4	4	4	13.4	13.4	13.4	50.284	0	108.42	459890000	8	24.148	25.4564	26.5254	19.8062	20.5508	21.19
+	2.14684	4.79919	AT2G47730.1	AT2G47730	ATGSTF8, ATGSTF5, GST6, GSTF8 | glutathione S-transferase phi 8	1	1	1	4.6	4.6	4.6	29.231	0	6.5902	88981000	1	23.7726	21.5007	23.6326	19.277	17.9993	17.232
+	2.45929	4.76118	AT1G64790.1;AT1G64790.2	AT1G64790	ILA | ILITYHIA	16	16	16	8.6	8.6	8.6	284.78	0	157.92	1200300000	33	26.613	26.4191	27.7042	21.3744	21.6197	23.4588
+	2.07662	4.73476	AT5G41600.1	AT5G41600	BTI3, RTNLB4 | VIRB2-interacting protein 3	1	1	1	8.9	8.9	8.9	28.948	0	19.843	157930000	2	23.2333	22.7556	25.1719	18.3923	18.2992	20.2651
+	2.28537	4.71635	AT2G47650.1;AT3G62830.2;AT3G62830.1;AT2G47650.2	AT2G47650	UXS4 | UDP-xylose synthase 4	4	4	4	12.6	12.6	12.6	49.945	0	27.583	276630000	7	24.4788	23.9128	25.0485	21.3107	18.755	19.2253
+	1.48183	4.6973	AT1G13080.1	AT1G13080	CYP71B2 | cytochrome P450, family 71, subfamily B, polypeptide 2	1	1	1	2	2	2	57.14	0.0030534	6.0693	176500000	1	22.2072	21.8891	26.4065	18.9635	19.0359	18.4115
+	2.89706	4.68899	AT1G79530.1	AT1G79530	GAPCP-1 | glyceraldehyde-3-phosphate dehydrogenase of plastid 1	3	2	2	7.3	5.5	5.5	44.83	0	13.678	177810000	4	24.6477	24.1896	24.7215	20.4168	18.7211	20.354
+	3.40214	4.63931	AT5G15490.1;AT3G29360.2;AT3G29360.1;AT5G39320.1;AT1G26570.1	AT5G15490	UDP-glucose 6-dehydrogenase family protein	4	4	4	8.5	8.5	8.5	53.117	0	30.27	282750000	5	25.1084	25.5441	24.1977	20.0462	20.5644	20.3217
+	2.69827	4.63211	AT5G45620.1;AT5G45620.2;AT4G19006.1	AT5G45620	Proteasome component (PCI) domain protein	3	3	3	7.8	7.8	7.8	44.167	0	22.996	366110000	8	25.4504	25.1687	24.8707	21.642	20.4681	19.4833
+	2.72504	4.60182	AT1G27770.2;AT1G27770.1	AT1G27770	ACA1, PEA1 | autoinhibited Ca2+-ATPase 1	1	1	1	1.3	1.3	1.3	103.72	0	7.0469	68090000	1	21.6667	22.8344	23.7881	18.1035	17.9361	18.4441
+	2.10351	4.55606	AT1G60780.1;AT1G10730.1	AT1G60780	HAP13 | Clathrin adaptor complexes medium subunit family protein	2	2	2	6.3	6.3	6.3	49.032	0	25.453	125940000	4	22.5973	23.0715	24.482	20.2888	18.1224	18.0713
+	1.73475	4.54019	AT5G60790.1	AT5G60790	ATGCN1, GCN1 | ABC transporter family protein	4	4	4	9.2	9.2	9.2	66.885	0	31.903	201000000	5	22.0784	23.4589	25.9407	19.9708	19.0187	18.868
+	1.74844	4.49712	AT1G12310.1;AT1G62820.1	AT1G12310	Calcium-binding EF-hand family protein	2	2	2	16.9	16.9	16.9	16.517	0	11.358	138950000	2	25.273	21.8944	24.0228	18.4196	18.8541	20.425
+	2.47927	4.48479	AT4G22710.1;AT4G22690.1	AT4G22710	CYP706A2 | cytochrome P450, family 706, subfamily A, polypeptide 2	3	3	3	9.3	9.3	9.3	59.425	0	19.585	135240000	3	23.2188	22.8454	24.6393	18.3493	18.9611	19.9387
+	3.38125	4.43564	AT2G02560.2;AT2G02560.1	AT2G02560	CAND1, ATCAND1, ETA2, TIP120, HVE | cullin-associated and neddylation dissociated	3	3	3	4.2	4.2	4.2	134.62	0	23.786	122740000	5	23.0535	23.4519	24.3988	19.153	19.0603	19.3839
+	3.02743	4.43358	AT3G48530.1	AT3G48530	KING1 | SNF1-related protein kinase regulatory subunit gamma 1	2	2	2	7.1	7.1	7.1	47.422	0	15.5	88797000	3	22.3523	22.8509	23.7467	18.6047	19.0401	18.0045
+	5.03088	4.42457	AT1G45000.2;AT1G45000.1;AT5G43010.1	AT1G45000	AAA-type ATPase family protein	8	8	7	29	29	25.4	37.572	0	77.565	816650000	10	26.7756	26.8808	26.4896	22.1737	22.4984	22.2002
+	3.33858	4.40775	AT5G18420.3;AT5G18420.1;AT5G18420.2	AT5G18420	unknown protein;FUNCTIONS IN: molecular_function unknown;INVOLVED IN: biological_process unknown;LOCATED IN: cellular_component unknown;EXPRESSED IN: 25 plant structures;EXPRESSED DURING: 15 growth stages;CONTAINS InterPro DOMAIN/s: Prot	1	1	1	2.7	2.7	2.7	50.074	0	8.4786	115220000	2	22.952	23.553	24.1759	18.9159	19.5999	18.9418
+	2.48346	4.40356	AT2G20190.1	AT2G20190	ATCLASP, CLASP | CLIP-associated protein	3	3	3	3.4	3.4	3.4	158.95	0	36.711	157480000	4	23.7067	24.1288	24.6461	20.9785	19.5138	18.7787
+	2.99022	4.35741	AT1G06410.1	AT1G06410	ATTPS7, TPS7, ATTPSA | trehalose-phosphatase/synthase 7	2	2	2	4.7	4.7	4.7	96.687	0	15.279	85912000	2	23.435	22.7702	23.0559	17.9553	19.5821	18.6516
+	2.6332	4.34968	AT5G09900.2;AT5G09900.1;AT5G09900.3;AT5G64760.2;AT5G64760.1	AT5G09900	EMB2107, RPN5A, MSA | 26S proteasome regulatory subunit, putative (RPN5)	5	5	5	14.9	14.9	14.9	50.85	0	46.203	489690000	11	24.3102	25.2193	26.4534	21.1708	20.7776	20.9854
+	3.23642	4.33013	AT4G22570.1	AT4G22570	APT3 | adenine phosphoribosyl transferase 3	1	1	1	8.2	8.2	8.2	20.352	0	8.263	79984000	5	22.2412	23.0296	22.2464	17.7343	18.8653	17.9272
+	2.97987	4.32476	AT5G19760.1	AT5G19760	Mitochondrial substrate carrier family protein	2	2	2	9.7	9.7	9.7	31.912	0	13.337	317510000	4	24.4216	22.9724	24.2679	19.2508	19.9806	19.4562
+	2.59316	4.31089	AT1G50670.1	AT1G50670	OTU-like cysteine protease family protein	1	1	1	6.7	6.7	6.7	23.425	0	6.9553	114170000	2	22.8166	23.467	24.3059	20.1584	18.8702	18.6282
+	3.87342	4.31011	AT5G03290.1;AT3G09810.1	AT5G03290	IDH-V | isocitrate dehydrogenase V	4	4	4	13.6	13.6	13.6	40.624	0	37.85	401830000	10	25.3696	25.7012	26.2143	21.171	21.7569	21.4269
+	2.00684	4.26705	AT1G50560.1	AT1G50560	CYP705A25 | cytochrome P450, family 705, subfamily A, polypeptide 25	1	1	1	2.3	2.3	2.3	58.471	0	7.0589	31131000	1	21.4452	22.3429	22.0204	19.2148	17.6412	16.1513
+	2.34878	4.24948	AT3G56150.2;AT3G56150.1	AT3G56150	EIF3C | eukaryotic translation initiation factor 3C	10	10	10	13.9	13.9	13.9	102.95	0	103.14	868230000	20	26.3988	26.2818	27.3561	22.6198	21.2149	23.4535
+	2.99934	4.23839	AT4G37410.1	AT4G37410	CYP81F4 | cytochrome P450, family 81, subfamily F, polypeptide 4	4	4	4	10.4	10.4	10.4	57.168	0	24.875	128550000	6	24.0609	22.9306	22.5576	19.1723	19.1063	18.5554
+	2.25612	4.23346	AT1G43710.1	AT1G43710	emb1075 | Pyridoxal phosphate (PLP)-dependent transferases superfamily protein	2	2	2	6.8	6.8	6.8	54.076	0	12.692	150260000	2	24.524	22.3911	23.284	18.8315	18.5683	20.0989
+	2.56878	4.22595	AT1G74960.3;AT1G74960.2;AT1G74960.1	AT1G74960	FAB1 | fatty acid biosynthesis 1	1	1	1	3.9	3.9	3.9	57.599	0	26.873	88957000	3	22.2283	23.3985	23.5717	19.1064	17.9102	19.5041
+	3.90292	4.20167	AT4G30190.1;AT4G30190.2;AT5G57350.2;AT5G57350.1	AT4G30190	AHA2, PMA2, HA2 | H(+)-ATPase 2	13	13	2	16.2	16.2	2.7	104.4	0	207.85	233830000	4	24.3707	24.5877	25.15	20.4184	20.8228	20.2621
+	1.99061	4.17773	AT2G22125.1	AT2G22125	CSI1 | binding	7	7	7	5.9	5.9	5.9	230.7	0	72.398	573280000	15	24.9476	25.5898	26.5294	21.3455	20.2348	22.9533
+	3.55345	4.16022	AT1G71270.1	AT1G71270	POK, TTD8, ATVPS52 | Vps52 / Sac2 family	1	1	1	2.8	2.8	2.8	80.937	0	7.8755	108580000	1	23.0322	23.5934	23.5716	19.8263	18.9981	18.8922
+	1.45687	4.15876	AT2G16950.2;AT2G16950.1	AT2G16950	TRN1, ATTRN1 | transportin 1	4	4	4	6.3	6.3	6.3	99.108	0	38.182	392130000	6	24.5209	24.6196	26.1505	18.5175	22.3491	21.9482
+	2.47958	4.14795	AT5G61780.1	AT5G61780	Tudor2, AtTudor2, TSN2 | TUDOR-SN protein 2	3	3	1	3.8	3.8	1.6	107.74	0	21.552	81765000	3	22.1013	22.2877	24.1519	18.5185	18.716	18.8626
+	2.18193	4.11762	AT1G70770.2;AT1G70770.1	AT1G70770	Protein of unknown function DUF2359, transmembrane	5	5	5	10	10	10	66.864	0	35.367	844660000	9	26.2575	25.4925	27.5518	21.3949	23.1903	22.3637
+	1.59335	4.10084	AT2G30860.1	AT2G30860	ATGSTF9, GLUTTR, ATGSTF7, GSTF9 | glutathione S-transferase PHI 9	1	1	1	12.6	12.6	12.6	24.146	0	7.2585	130140000	2	23.2542	22.8668	25.0481	18.6321	18.6709	21.5637
+	2.58047	4.09351	AT5G59613.2;AT5G59613.1;AT3G46430.1	AT5G59613	unknown protein;FUNCTIONS IN: molecular_function unknown;INVOLVED IN: biological_process unknown;LOCATED IN: mitochondrial respiratory chain complex III;BEST Arabidopsis thaliana protein match is: unknown protein (TAIR:AT3G46430.1). | chr5	1	1	1	18.2	18.2	18.2	6.5846	0	6.9583	104120000	3	23.3842	23.1423	23.6688	18.5369	20.4754	18.9024
+	2.91197	4.07845	AT2G30490.1	AT2G30490	ATC4H, C4H, CYP73A5, REF3 | cinnamate-4-hydroxylase	8	8	7	20.6	20.6	18.8	57.792	0	139.57	819810000	13	25.965	26.3577	26.9001	21.7096	22.149	23.1289
+	1.96993	4.07811	AT3G61470.1	AT3G61470	LHCA2 | photosystem I light harvesting complex gene 2	1	1	1	6.6	6.6	6.6	27.755	0	6.59	95549000	1	22.124	22.0606	24.6922	18.4292	19.3131	18.9001
+	1.78215	4.04914	AT2G31660.1	AT2G31660	SAD2, URM9 | ARM repeat superfamily protein	3	3	3	3.9	3.9	3.9	119.25	0	27.436	172590000	5	23.7284	23.9143	24.5495	18.4649	21.8533	19.7266
+	2.50727	4.04781	AT5G23630.1	AT5G23630	PDR2, MIA | phosphate deficiency response 2	1	1	1	2.5	2.5	2.5	131.11	0.0031153	6.1373	80879000	1	22.4484	22.3729	24.2649	18.742	19.2419	18.9588
+	1.81063	4.03774	AT1G55670.1	AT1G55670	PSAG | photosystem I subunit G	2	2	2	10.6	10.6	10.6	17.085	0	24.205	250700000	3	24.5086	25.3946	24.9829	21.8059	18.9998	21.9672
+	2.48144	4.01246	AT1G06430.1;AT2G30950.1	AT1G06430	FTSH8 | FTSH protease 8	1	1	1	3.2	3.2	3.2	73.198	0	9.1159	101850000	1	22.7408	22.5461	24.532	19.4465	19.231	19.104
+	1.58925	4.01091	AT3G52140.3;AT3G52140.1;AT3G52140.2;AT3G52140.4	AT3G52140	tetratricopeptide repeat (TPR)-containing protein	2	2	2	1.6	1.6	1.6	152.52	0	19.183	107960000	3	22.6835	23.7383	23.7798	18.1242	21.5836	18.461
+	1.60339	4.00438	AT1G09620.1	AT1G09620	ATP binding;leucine-tRNA ligases;aminoacyl-tRNA ligases;nucleotide binding;ATP binding;aminoacyl-tRNA ligases	4	4	4	6.6	6.6	6.6	123.45	0	37.929	298380000	6	25.1266	22.9207	25.3402	21.2078	18.7741	21.3924
+	2.38753	3.99478	AT3G58140.1	AT3G58140	phenylalanyl-tRNA synthetase class IIc family protein	1	1	1	2.8	2.8	2.8	49.251	0	10.124	100150000	4	23.8811	22.4063	23.0973	20.0659	19.0832	18.2514
+	1.64392	3.98957	AT3G48870.2;AT3G48870.1	AT3G48870	HSP93-III | Clp ATPase	13	1	1	18.7	1.8	1.8	102.24	0	37.695	362890000	3	25.1285	24.9088	25.4246	18.9893	22	22.5039
+	2.28508	3.96664	AT4G10340.1	AT4G10340	LHCB5 | light harvesting complex of photosystem II 5	9	9	9	40.7	40.7	40.7	30.156	0	323.31	3927500000	26	27.9281	28.9704	29.223	23.5506	25.2694	25.4016
+	3.92616	3.95917	AT5G16070.1;AT3G02530.1	AT5G16070	TCP-1/cpn60 chaperonin family protein	1	1	1	1.9	1.9	1.9	58.927	0.0031797	6.1702	44594000	3	22.4717	21.9582	22.6626	18.1914	18.2992	18.7244
+	3.24601	3.95049	AT3G13160.1	AT3G13160	Tetratricopeptide repeat (TPR)-like superfamily protein	1	1	1	4.3	4.3	4.3	44.927	0	19.719	78697000	1	23.3232	22.1833	23.0616	18.5274	19.1767	19.0126
+	2.45256	3.92738	AT3G23620.1	AT3G23620	Ribosomal RNA processing Brix domain protein	1	1	1	5.7	5.7	5.7	35.727	0	6.785	77724000	1	23.2618	22.3092	23.3437	19.5887	19.5885	17.9553
+	2.03837	3.92193	AT4G11420.1	AT4G11420	EIF3A, ATEIF3A-1, EIF3A-1, ATTIF3A1, TIF3A1 | eukaryotic translation initiation factor 3A	11	11	11	14.5	14.5	14.5	114.3	0	118.58	925620000	16	25.0139	26.8307	27.2958	21.9234	23.3585	22.0928
+	1.75584	3.91342	AT5G27770.1	AT5G27770	Ribosomal L22e protein family	1	1	1	9.7	9.7	9.7	14.047	0.0030303	6.0503	72774000	1	23.2164	23.3426	20.6993	17.8419	18.1546	19.5216
+	4.13367	3.91032	AT2G04030.2;AT2G04030.1	AT2G04030	CR88, Hsp88.1, AtHsp90.5 | Chaperone protein htpG family protein	15	15	12	30	30	26.1	88.255	0	132.41	2290800000	20	27.638	27.4466	28.1352	23.9592	23.9183	23.6114
+	4.19136	3.90035	AT4G33510.2;AT4G33510.1;AT4G39980.1	AT4G33510	DHS2 | 3-deoxy-d-arabino-heptulosonate 7-phosphate synthase	4	4	2	12.5	12.5	7.2	48.107	0	25.917	74267000	4	22.8191	23.1802	22.5295	18.6992	19.0434	19.0851
+	4.87094	3.8863	AT5G46290.2;AT5G46290.1;AT5G46290.3	AT5G46290	KASI, KAS1 | 3-ketoacyl-acyl carrier protein synthase I	5	5	5	19.6	19.6	19.6	44.729	0	61.625	1208600000	11	26.8578	27.1085	26.9568	23.3504	22.9822	22.9316
+	3.00189	3.8804	AT5G13280.1	AT5G13280	AK-LYS1, AK1, AK | aspartate kinase 1	2	2	2	6.3	6.3	6.3	62.297	0	12.542	66298000	2	23.0008	21.8845	23.1877	18.5034	19.1656	18.7628
+	2.69793	3.87431	AT2G40730.1	AT2G40730	Protein kinase family protein with ARM repeat domain	1	1	1	1.6	1.6	1.6	86.045	0	7.4326	65582000	2	22.1342	22.1719	23.7155	18.5148	18.9062	18.9778
+	1.62256	3.86681	AT1G01960.1	AT1G01960	EDA10 | SEC7-like guanine nucleotide exchange family protein	3	3	1	2.2	2.2	0.8	194.94	0	63.514	80332000	3	22.4018	22.2755	24.0223	17.773	18.4696	20.8565
+	2.37617	3.85198	AT1G14710.2;AT1G14710.1	AT1G14710	hydroxyproline-rich glycoprotein family protein	2	2	2	4.5	4.5	4.5	66.203	0	12.787	44067000	3	21.7379	21.158	23.0873	18.7475	17.6469	18.0328
+	2.33805	3.84741	AT5G12470.1	AT5G12470	Protein of unknown function (DUF3411)	2	2	2	8	8	8	41.323	0	13.318	77130000	2	22.8903	23.5582	21.3582	18.4331	18.8675	18.9638
+	3.03683	3.81716	AT4G27640.1	AT4G27640	ARM repeat superfamily protein	2	2	2	3.4	3.4	3.4	115.23	0	35.872	147480000	5	23.4588	24.3145	24.4527	19.6741	20.4148	20.6856
+	1.80569	3.81641	AT3G11910.2;AT3G11910.1	AT3G11910	UBP13	14	6	6	14.2	5.4	5.4	130.52	0	46.003	270570000	11	25.858	24.2587	22.6914	20.8009	20.5679	19.9901
+	2.38338	3.81605	AT2G44310.1	AT2G44310	Calcium-binding EF-hand family protein	1	1	1	19	19	19	15.821	0.0032733	6.293	121380000	1	23.2127	23.61	24.1192	18.6561	20.3001	20.5375
+	2.70768	3.80863	AT2G36160.1	AT2G36160	Ribosomal protein S11 family protein	5	5	1	55.3	55.3	7.3	16.257	0	46.509	93537000	2	23.0576	23.3613	23.1639	19.6187	18.3903	20.1479
+	1.77352	3.79631	AT5G43780.1	AT5G43780	APS4 | Pseudouridine synthase/archaeosine transglycosylase-like family protein	1	1	1	3	3	3	52.125	0	11.007	82898000	3	22.4688	23.078	23.7454	18.8192	21.0226	18.0615
+	2.74062	3.77779	AT1G76850.1;AT1G21170.1	AT1G76850	SEC5A | exocyst complex component sec5	2	2	2	3.2	3.2	3.2	121.9	0	20.61	122670000	4	23.0743	23.8191	24.4116	19.3557	20.1094	20.5066
+	3.76386	3.76571	AT4G38630.1	AT4G38630	RPN10, MCB1, ATMCB1, MBP1 | regulatory particle non-ATPase 10	2	2	2	5.4	5.4	5.4	40.757	0	12.77	145140000	4	23.8826	23.724	24.2182	20.1947	19.7565	20.5765
+	2.97016	3.71736	AT5G05620.1;AT3G61650.1	AT5G05620	TUBG2, ATGCP2, GCP2 | gamma-tubulin complex protein 2	1	1	1	4.9	4.9	4.9	53.277	0	6.5811	79061000	1	23.1842	22.2121	23.1727	19.1303	19.6613	18.6254
+	2.06142	3.6987	AT4G21445.1	AT4G21445	unknown protein;FUNCTIONS IN: molecular_function unknown;INVOLVED IN: biological_process unknown;LOCATED IN: chloroplast, chloroplast stroma;Has 30201 Blast hits to 17322 proteins in 780 species: Archae - 12;Bacteria - 1396;Metazoa - 173	1	1	1	13.6	13.6	13.6	17.618	0	9.8282	77239000	2	23.0632	22.7252	22.8737	17.8479	20.4979	19.2201
+	2.08665	3.69356	AT3G22310.1;AT3G22330.1	AT3G22310	PMH1, ATRH9 | putative mitochondrial RNA helicase 1	1	1	1	1.8	1.8	1.8	63.609	0	6.5769	110500000	4	23.0816	22.4899	24.4563	20.239	18.6882	20.02
+	3.23478	3.6905	AT1G29150.1	AT1G29150	ATS9, RPN6 | non-ATPase subunit 9	4	4	4	13.4	13.4	13.4	46.749	0	44.184	652080000	8	26.416	27.3144	26.3305	22.8865	23.3831	22.7197
+	2.43276	3.65702	AT3G08580.2;AT3G08580.1	AT3G08580	AAC1 | ADP/ATP carrier 1	11	11	6	28.9	28.9	16.8	41.475	0	167.94	2949700000	21	27.9276	27.5049	28.5928	23.3561	24.6479	25.0503
+	3.58628	3.64879	AT4G31490.1;AT4G31480.2;AT4G31480.1	AT4G31490	Coatomer, beta subunit	10	10	10	12.6	12.6	12.6	106.08	0	78.308	1101000000	20	26.8837	27.1555	27.368	23.0243	23.9395	23.497
+	2.0945	3.64809	AT2G22360.1	AT2G22360	DNAJ heat shock family protein	2	1	1	6.6	4.8	4.8	47.761	0	9.7799	42705000	1	22.333	21.7969	22.118	17.1201	18.5493	19.6343
+	1.7751	3.63895	AT1G04690.1	AT1G04690	KAB1, KV-BETA1 | potassium channel beta subunit 1	1	1	1	4.6	4.6	4.6	36.538	0	7.0972	60572000	2	21.9595	22.532	23.8304	19.5914	20.1183	17.6952
+	2.45934	3.58751	AT1G68680.1	AT1G68680	unknown protein;FUNCTIONS IN: molecular_function unknown;INVOLVED IN: biological_process unknown;LOCATED IN: chloroplast;EXPRESSED IN: 23 plant structures;EXPRESSED DURING: 16 growth stages;Has 20 Blast hits to 20 proteins in 11 species:	1	1	1	20	20	20	8.3509	0	7.0861	52788000	2	21.7178	21.746	23.4621	18.6268	18.8359	18.7008
+	2.95326	3.56599	AT5G08650.1	AT5G08650	Small GTP-binding protein	1	1	1	2.2	2.2	2.2	75.436	0	9.9516	69136000	2	22.6017	22.2328	23.3941	19.3076	19.5351	18.688
+	1.89034	3.54631	AT1G31330.1	AT1G31330	PSAF | photosystem I subunit F	3	3	3	17.6	17.6	17.6	24.173	0	26.385	143460000	7	23.0497	23.3667	25.4765	20.1347	20.0481	21.0711
+	1.88287	3.53156	AT3G60860.1	AT3G60860	SEC7-like guanine nucleotide exchange family protein	3	1	1	2.1	0.8	0.8	199.63	0	7.4756	43841000	1	21.9816	21.9278	22.1322	16.8337	19.4328	19.1805
+	2.37148	3.52207	AT5G19550.1	AT5G19550	ASP2, AAT2 | aspartate aminotransferase 2	5	5	5	16	16	16	44.266	0	37.15	433140000	8	26.1504	27.0015	25.1698	22.0557	22.6606	23.0392
+	1.87067	3.49115	AT1G09340.1	AT1G09340	CRB, CSP41B, HIP1.3 | chloroplast RNA binding	1	1	1	3.7	3.7	3.7	42.619	0	10.795	39047000	1	22.3729	22.478	20.022	17.8828	18.5359	17.9806
+	3.1037	3.48182	AT3G62290.3;AT3G62290.2;AT3G62290.1;AT2G47170.1;AT1G70490.3;AT1G70490.2;AT1G70490.1;AT1G23490.1;AT1G10630.1;AT5G14670.1	AT3G62290	ARFA1E | ADP-ribosylation factor A1E	3	3	3	16	16	16	20.607	0	21.718	294030000	10	23.9091	23.5037	24.7681	20.4571	20.712	20.5664
+	2.20684	3.46948	AT5G64940.2;AT5G64940.1	AT5G64940	ATATH13, ATH13 | ABC2 homolog 13	1	1	1	2.4	2.4	2.4	86.022	0	8.772	50875000	1	22.4995	22.301	21.4112	17.5472	18.7658	19.4902
+	2.08334	3.4349	AT3G43300.2;AT3G43300.1	AT3G43300	ATMIN7 | HOPM interactor 7	7	7	7	5.2	5.2	5.2	191.45	0	128.3	469350000	13	24.9235	25.1455	25.9498	20.667	22.2882	22.7589
+	3.09707	3.42586	AT3G08530.1	AT3G08530	Clathrin, heavy chain	41	41	6	33	33	5.5	193.27	0	323.31	1011100000	13	27.1018	26.9364	26.8333	24.2473	23.0323	23.3144
+	1.71221	3.40156	AT5G24690.1	AT5G24690	Protein of unknown function (DUF3411)	1	1	1	4.8	4.8	4.8	56.812	0	10.112	60664000	3	22.1484	22.2036	23.3725	18.2704	20.7811	18.4683
+	2.72699	3.38872	AT5G63190.2;AT5G63190.1	AT5G63190	MA3 domain-containing protein	1	1	1	2	2	2	77.555	0	13.931	42966000	2	21.5634	21.9757	22.8855	18.5535	19.2519	18.4531
+	2.48375	3.37331	AT2G36250.2;AT2G36250.1;AT3G52750.1	AT2G36250	FTSZ2-1, ATFTSZ2-1 | Tubulin/FtsZ family protein	3	3	3	9.6	9.6	9.6	50.721	0	18.91	243250000	4	24.6135	24.2185	24.9093	20.7345	22.2037	20.6832
+	2.85443	3.37067	AT2G39730.2;AT2G39730.3;AT2G39730.1	AT2G39730	RCA | rubisco activase	20	20	20	52.5	52.5	52.5	49.1	0	323.31	53950000000	66	31.6051	31.9136	32.7735	28.4361	29.2157	28.5285
+	2.62733	3.364	AT2G01350.2;AT2G01350.4;AT2G01350.3;AT2G01350.1	AT2G01350	QPT | quinolinate phoshoribosyltransferase	1	1	1	8.2	8.2	8.2	30.845	0	6.6692	53312000	1	21.7402	22.2065	23.1397	18.4802	19.1498	19.3644
+	1.86954	3.36136	AT2G01250.1;AT2G01250.2	AT2G01250	Ribosomal protein L30/L7 family protein	6	6	2	25.6	25.6	9.5	28.171	0	63.259	72786000	2	23.3781	21.3484	23.8154	19.5148	19.8864	19.0566
+	1.96191	3.32195	AT1G20620.5;AT1G20620.1;AT1G20620.4;AT1G20620.2	AT1G20620	CAT3, SEN2, ATCAT3 | catalase 3	6	6	5	13.8	13.8	10.9	55.967	0	38.591	394100000	10	25.9533	25.4192	24.4406	22.867	22.1402	20.84
+	2.08052	3.32141	AT1G78570.1	AT1G78570	RHM1, ROL1, ATRHM1 | rhamnose biosynthesis 1	5	5	5	9.7	9.7	9.7	75.371	0	56.042	656890000	10	26.8964	26.425	24.7394	22.7974	22.3171	22.9821
+	1.9168	3.31813	AT1G01320.2;AT1G01320.1	AT1G01320	Tetratricopeptide repeat (TPR)-like superfamily protein	2	2	2	2	2	2	197.5	0	21.716	67812000	3	21.0237	23.262	22.8427	19.7171	18.7145	18.7424
+	1.89546	3.30227	AT1G25490.1	AT1G25490	RCN1, REGA, ATB BETA BETA, EER1 | ARM repeat superfamily protein	8	8	5	19.9	19.9	12.1	65.493	0	96.613	489540000	10	25.5069	25.2644	26.385	22.5821	21.1474	23.52
+	3.23236	3.30037	AT4G01800.1;AT4G01800.2	AT4G01800	AGY1, AtcpSecA, SECA1 | Albino or Glassy Yellow 1	2	2	2	2.8	2.8	2.8	115.18	0	11.865	52689000	2	21.7988	22.688	22.1666	19.3403	18.7028	18.7091
+	2.25318	3.29061	AT1G09040.1;AT1G09050.1	AT1G09040	unknown protein;FUNCTIONS IN: molecular_function unknown;INVOLVED IN: biological_process unknown;LOCATED IN: membrane;EXPRESSED IN: leaf;BEST Arabidopsis thaliana protein match is: unknown protein (TAIR:AT1G09050.1);Has 614 Blast hits to	1	1	1	1.1	1.1	1.1	102.43	0.0031104	6.1318	21815000	2	21.7532	19.9504	21.6727	17.6671	17.7094	18.1279
+	2.05536	3.28168	AT4G23670.1	AT4G23670	Polyketide cyclase/dehydrase and lipid transport superfamily protein	1	1	1	7.3	7.3	7.3	17.518	0.0033501	6.3665	76563000	2	23.2716	22.8691	22.9059	20.9978	18.6909	19.5128
+	1.99974	3.26447	AT3G08943.1;AT3G08947.1	AT3G08943	ARM repeat superfamily protein	6	6	6	9.5	9.5	9.5	96.4	0	67.363	456910000	11	25.4991	23.9718	26.2108	21.5528	21.8958	22.4396
+	2.37482	3.252	AT1G56070.1	AT1G56070	LOS1 | Ribosomal protein S5/Elongation factor G/III/V family protein	14	14	14	25.6	25.6	25.6	93.89	0	217.1	4140200000	37	28.0537	27.9528	29.1832	24.4866	25.8354	25.1117
+	2.15163	3.24329	AT2G31810.2;AT2G31810.3;AT2G31810.1	AT2G31810	ACT domain-containing small subunit of acetolactate synthase protein	2	2	2	5	5	5	47.227	0	13.913	21279000	3	21.5832	21.5365	19.9005	17.1359	18.1576	17.9969
+	3.34779	3.23948	AT5G53480.1	AT5G53480	ARM repeat superfamily protein	9	9	9	15.6	15.6	15.6	96.258	0	111.47	1025700000	13	26.6652	27.3119	26.4622	23.3733	23.4427	23.9049
+	1.83971	3.22395	AT5G65020.2;AT5G65020.1	AT5G65020	ANNAT2 | annexin 2	1	1	1	3.3	3.3	3.3	34.873	0.0031546	6.1551	45839000	1	22.3845	22.183	22.2966	18.7551	20.5392	17.8979
+	3.1923	3.17315	AT5G08610.1;AT5G08620.1;AT5G63630.1	AT5G08610	P-loop containing nucleoside triphosphate hydrolases superfamily protein	2	2	2	3.5	3.5	3.5	94.185	0	18.653	176350000	6	23.7503	24.1618	24.5644	20.579	21.3733	21.0047
+	2.71051	3.15835	AT4G10840.1	AT4G10840	Tetratricopeptide repeat (TPR)-like superfamily protein	1	1	1	2.1	2.1	2.1	66.28	0	25.527	129500000	2	23.6439	24.1208	23.4884	19.8408	20.7666	21.1707
+	2.52849	3.10236	AT1G79340.1	AT1G79340	AtMC4, MC4 | metacaspase 4	3	3	3	8.9	8.9	8.9	45.483	0	31.807	357630000	5	25.2891	25.283	25.5292	21.3432	22.5365	22.9146
+	2.32141	3.0854	AT5G55220.1	AT5G55220	trigger factor type chaperone family protein	3	3	3	5.9	5.9	5.9	61.733	0	23.558	310210000	7	24.5277	24.8097	25.5887	21.0527	22.063	22.5543
+	2.01455	3.06688	AT2G42520.1;AT3G58570.1	AT2G42520	P-loop containing nucleoside triphosphate hydrolases superfamily protein	4	1	1	6.6	2.1	2.1	67.625	0.0031056	6.1317	65216000	2	21.7236	23.2911	23.2953	20.5064	19.3244	19.2785
+	2.69895	3.06224	AT3G56940.2;AT3G56940.1	AT3G56940	CRD1 | dicarboxylate diiron protein, putative (Crd1)	4	4	4	15.4	15.4	15.4	39.178	0	49.611	352670000	10	25.1955	25.49	24.8998	22.8484	21.5001	22.05
+	2.02313	3.0523	AT5G19820.1	AT5G19820	emb2734 | ARM repeat superfamily protein	12	12	12	14.4	14.4	14.4	123.82	0	204	1353300000	33	26.1567	26.0155	27.1221	22.3935	23.439	24.3049
+	2.45205	3.05172	AT3G06720.2;AT3G06720.1	AT3G06720	AT-IMP, ATKAP ALPHA, AIMP ALPHA | importin alpha isoform 1	7	7	5	20.1	20.1	16.4	58.644	0	73.387	1232800000	7	27.0572	27.6124	27.4534	23.4664	24.426	25.0755
+	3.671	3.0235	AT5G65010.1;AT5G65010.2	AT5G65010	ASN2 | asparagine synthetase 2	7	7	7	17.6	17.6	17.6	65.029	0	72.296	750800000	11	26.0543	26.644	26.034	23.3182	22.9727	23.3708
+	2.23293	3.00927	AT1G16890.1;AT1G78870.2;AT1G16890.2;AT1G78870.1;AT1G16890.3	AT1G16890	UBC36, UBC13B | ubiquitin-conjugating enzyme 36	1	1	1	20.8	20.8	20.8	13.631	0	7.8909	104090000	3	23.3151	22.8004	24.2422	20.7157	20.904	19.7102
+	2.7751	2.99841	AT1G59870.1;AT4G15215.1;AT4G15230.1;AT2G37280.1;AT1G15210.1;AT3G53480.1	AT1G59870	PEN3, PDR8, ATPDR8, ABCG36, ATABCG36 | ABC-2 and Plant PDR ABC-type transporter family protein	2	2	2	1.2	1.2	1.2	165.08	0	12.126	45135000	2	22.4386	21.7065	22.4331	18.6651	19.1584	19.7594
+	2.14037	2.986	AT2G38750.1	AT2G38750	ANNAT4 | annexin 4	5	5	5	14.4	14.4	14.4	36.221	0	167.65	430030000	14	25.6309	25.1736	25.1496	21.5077	22.0614	23.427
+	3.09446	2.96954	AT3G62530.1	AT3G62530	ARM repeat superfamily protein	5	5	5	33.9	33.9	33.9	24.503	0	79.975	885120000	9	26.0517	26.3516	26.3157	22.6584	23.4704	23.6815
+	2.3344	2.95115	AT1G13440.1;AT3G04120.1;AT1G13440.2	AT1G13440	GAPC-2, GAPC2 | glyceraldehyde-3-phosphate dehydrogenase C2	18	18	17	59.8	59.8	57.4	36.913	0	323.31	48761000000	67	31.6521	32.1957	32.8599	28.5981	29.3455	29.9106
+	2.11445	2.92381	AT1G23410.1;AT3G62250.1;AT2G47110.2;AT2G47110.1;AT3G52590.1;AT2G36170.1;AT4G05050.4;AT2G35635.1;AT1G31340.1;AT4G05050.3;AT4G05050.2;AT4G05050.1;AT4G02890.2;AT4G02890.1;AT1G55060.1;AT4G05320.5;AT4G02890.4;AT4G02890.3;AT5G03240.3;AT5G03240.2;AT5G03240.1;AT1G65350.1;AT5G37640.1;AT4G05320.6;AT4G05320.3;AT4G05320.1;AT5G20620.1;AT4G05320.4;AT4G05320.2;P62979	AT1G23410	Ribosomal protein S27a / Ubiquitin family protein	5	5	5	25	25	25	17.671	0	255.26	8434200000	15	30.037	28.0263	29.08	25.932	26.1796	26.2603
+	3.14756	2.90874	AT4G13940.1;AT4G13940.4;AT4G13940.3;AT4G13940.2;AT3G23810.1	AT4G13940	HOG1, EMB1395, SAHH1, MEE58, ATSAHH1 | S-adenosyl-L-homocysteine hydrolase	7	7	7	20	20	20	53.378	0	62.433	626160000	11	26.1072	26.8326	25.8155	23.3389	23.2329	23.4573
+	2.60077	2.90617	AT4G20360.1	AT4G20360	ATRAB8D, ATRABE1B, RABE1b | RAB GTPase homolog E1B	15	15	15	40.3	40.3	40.3	51.63	0	258.67	11559000000	70	29.6936	29.6197	30.8881	27.3421	26.9148	27.2261
+	2.97422	2.89257	AT5G58290.1	AT5G58290	RPT3 | regulatory particle triple-A ATPase 3	5	4	4	17.2	14.2	14.2	45.751	0	27.543	409320000	7	25.6942	25.4801	25.0843	21.956	22.7178	22.9071
+	2.07824	2.87463	AT3G62310.1;AT2G47250.1	AT3G62310	RNA helicase family protein	1	1	1	1.7	1.7	1.7	82.693	0	9.762	35077000	3	21.4485	21.9342	21.7405	18.1247	18.4008	19.9738
+	2.85805	2.86896	AT5G14040.1	AT5G14040	PHT3;1 | phosphate transporter 3;1	11	11	11	33.3	33.3	33.3	40.089	0	115.48	3502800000	30	27.8861	28.7213	28.8328	25.9474	25.6498	25.2361
+	2.37717	2.86318	AT5G05010.2;AT5G05010.1	AT5G05010	clathrin adaptor complexes medium subunit family protein	7	7	7	19	19	19	57.718	0	47.285	436260000	10	25.196	26.0215	24.8735	21.8312	22.6732	22.9971
+	2.9087	2.85371	AT2G14120.2;AT2G14120.1;AT4G33650.1;AT4G33650.2;AT2G14120.3	AT2G14120	DRP3B | dynamin related protein	2	2	2	3.1	3.1	3.1	86.691	0	14.162	273510000	4	24.795	24.3714	25.5269	21.9385	21.9633	22.2303
+	2.26386	2.84981	AT1G12840.1	AT1G12840	DET3, ATVHA-C | vacuolar ATP synthase subunit C (VATC) / V-ATPase C subunit / vacuolar proton pump C subunit (DET3)	2	2	2	11.2	11.2	11.2	42.619	0	17.21	784470000	10	25.6483	25.825	26.7944	22.5126	23.4069	23.7988
+	3.17227	2.83944	AT1G74470.1	AT1G74470	Pyridine nucleotide-disulphide oxidoreductase family protein	6	6	6	18.2	18.2	18.2	51.837	0	39.208	572220000	8	26.1365	25.7822	25.7671	22.5373	23.1731	23.4569
+	2.57732	2.76631	AT1G48520.2;AT1G48520.3;AT1G48520.1	AT1G48520	GATB | GLU-ADT subunit B	1	1	1	2.9	2.9	2.9	52.508	0	6.8068	42392000	3	21.7373	22.1301	22.5157	18.7167	19.9184	19.449
+	3.79636	2.70847	AT2G28360.1;AT3G45190.1;AT1G07990.1	AT2G28360	SIT4 phosphatase-associated family protein	1	1	1	1.3	1.3	1.3	87.507	0	21.143	53086000	3	22.6142	22.0323	22.183	19.3883	19.6467	19.6692
+	2.43153	2.69506	AT4G19490.2;AT4G19490.1	AT4G19490	ATVPS54, VPS54 | VPS54	1	1	1	1	1	1	113.86	0.003231	6.2461	32777000	3	21.3843	20.9733	22.3836	18.7884	18.6957	19.1719
+	2.45783	2.63953	AT5G17920.2;AT5G17920.1;AT3G03780.3;AT3G03780.2;AT3G03780.1	AT5G17920	ATCIMS | Cobalamin-independent synthase family protein	20	20	20	32	32	32	84.356	0	268.45	5741900000	61	28.5253	28.09	29.3469	25.5871	26.2834	26.1731
+	2.74555	2.59304	AT5G28540.1;AT5G42020.1;AT5G42020.2	AT5G28540	BIP1 | heat shock protein 70 (Hsp 70) family protein	11	9	9	20.6	18.1	18.1	73.628	0	102.64	1454600000	18	26.8406	26.9961	27.1472	23.8385	24.3531	25.0133
+	2.51182	2.53031	AT4G18480.1	AT4G18480	CHLI1, CH42, CH-42, CHL11, CHLI-1 | P-loop containing nucleoside triphosphate hydrolases superfamily protein	3	3	3	9.7	9.7	9.7	46.269	0	17.183	345390000	4	25.5016	24.5931	25.6389	22.5954	23.1434	22.4038
+	2.92254	2.51721	AT4G31990.4;AT5G11520.1;AT4G31990.2;AT4G31990.1;AT4G31990.3	AT4G31990	ASP5 | aspartate aminotransferase 5	1	1	1	2	2	2	49.324	0.0031847	6.1736	32398000	2	21.3525	21.6768	21.7729	18.9354	18.6924	19.6229
+	3.39068	2.34984	AT2G34420.1;AT2G34430.1;AT2G05100.1;AT2G05070.1;AT3G27690.1;AT1G29930.1;AT1G29920.1;AT1G29910.1	AT2G34420	LHB1B2, LHCB1.5 | photosystem II light harvesting complex gene B1B2	4	4	4	17.7	17.7	17.7	28.054	0	37.115	1004800000	8	26.4435	26.5455	26.3006	24.2405	23.6745	24.325
+	4.31499	2.34838	AT3G23990.1;AT2G33210.2;AT2G33210.1	AT3G23990	HSP60, HSP60-3B | heat shock protein 60	4	4	4	7.5	7.5	7.5	61.28	0	32.769	284100000	7	25.0429	24.9452	24.7024	22.587	22.4043	22.6541

## Sheet: F1C_DAR2 interactors
Significant	-LOG(P-value)	Difference	Majority protein IDs	Leading protein ID	Protein description	Peptides	Razor + unique peptides	Unique peptides	Sequence coverage [%]	Unique + razor sequence coverage [%]	Unique sequence coverage [%]	Mol. weight [kDa]	Q-value	Score	Intensity	MS/MS count	LFQ intensity DAR2_rep1	LFQ intensity DAR2_rep2	LFQ intensity DAR2_rep3	LFQ intensity WT_rep1	LFQ intensity WT_rep2	LFQ intensity WT_rep3
+	3.9417	8.28058	AT3G13330.1	AT3G13330	PA200 | proteasome activating protein 200	2	2	2	1.2	1.2	1.2	203.62	0	12.989	1267200000	7	26.9167	27.8139	26.917	19.131	19.6212	18.0536
+	4.0588	8.17264	AT1G15200.1;AT1G15200.2;AT1G15200.4;AT1G15200.3	AT1G15200	protein-protein interaction regulator family protein	1	1	1	3.1	3.1	3.1	48.905	0	26.019	126310000	3	26.4691	27.6919	26.0737	18.2877	18.7575	18.6716
+	1.95022	7.89624	AT5G38420.1;AT5G38410.1;AT5G38410.3;AT5G38410.2	AT5G38420	Ribulose bisphosphate carboxylase (small chain) family protein	5	5	2	24.9	24.9	9.9	20.35	0	37.258	1995400000	6	29.916	27.1578	28.1557	23.5713	18.3009	19.6686
+	3.28332	7.04942	AT5G16130.1;AT3G02560.2;AT3G02560.1	AT5G16130	Ribosomal protein S7e family protein	1	1	1	4.7	4.7	4.7	22.06	0.0033389	6.3645	159960000	4	25.7973	25.0072	26.0947	18.748	19.549	17.454
+	1.80096	6.47324	P42212;PSB_N_GFP;PSB_C_GFP;Q9U6Y5;PSB_N_GS_yellow;PSB_N_GS_green;PSB_C_GS_green;PSB_C_GS_yellow	GFP	GFP	1	1	1	9.7	9.7	9.7	26.886	0	10.018	174980000	2	27.7148	22.2267	25.5504	18.3675	19.0617	18.6431
+	1.7364	6.07905	AT4G14960.2;AT1G50010.1;AT1G04820.1;AT4G14960.1	AT4G14960	TUA6 | Tubulin/FtsZ family protein	10	10	4	29.3	29.3	15.8	49.537	0	323.31	4564000000	13	28.3033	28.9007	29.3515	24.1972	24.4466	19.6747
+	2.5059	5.89865	AT2G43950.1	AT2G43950	OEP37, ATOEP37 | chloroplast outer envelope protein 37	1	1	1	4.1	4.1	4.1	38.835	0.0016949	6.4454	35105000	1	24.5102	26.2443	24.1582	19.5814	19.8822	17.7532
+	4.15216	5.85167	AT4G11380.1;AT4G11380.2;AT4G23460.1	AT4G11380	Adaptin family protein	4	4	4	7.2	7.2	7.2	99.371	0	27.345	272670000	5	24.5345	25.0106	24.7521	18.4629	19.5225	18.7568
+	2.49263	5.83845	AT5G19760.1	AT5G19760	Mitochondrial substrate carrier family protein	2	2	2	9.7	9.7	9.7	31.912	0	13.337	317510000	4	23.656	25.9006	26.6464	19.2508	19.9806	19.4562
+	2.1026	5.7818	AT1G07890.6;AT1G07890.8;AT1G07890.7;AT1G07890.5;AT1G07890.4;AT1G07890.3;AT1G07890.2;AT1G07890.1	AT1G07890	APX1, MEE6, CS1, ATAPX1, ATAPX01 | ascorbate peroxidase 1	2	2	2	9.6	9.6	9.6	27.52	0	16.534	318820000	4	27.2852	23.5431	26.4765	20.1991	20.3514	19.4089
+	4.72765	5.5338	AT4G22570.1	AT4G22570	APT3 | adenine phosphoribosyl transferase 3	1	1	1	8.2	8.2	8.2	20.352	0	8.263	79984000	5	24.8435	24.5328	24.1451	18.7501	19.0266	19.1434
+	4.81966	5.38543	AT3G62290.3;AT3G62290.2;AT3G62290.1;AT2G47170.1;AT1G70490.3;AT1G70490.2;AT1G70490.1;AT1G23490.1;AT1G10630.1;AT5G14670.1	AT3G62290	ARFA1E | ADP-ribosylation factor A1E	3	3	3	16	16	16	20.607	0	21.718	294030000	10	25.685	25.8499	26.3569	20.4571	20.712	20.5664
+	1.45952	5.11759	AT2G18740.2;AT4G30330.1;AT2G18740.1	AT2G18740	Small nuclear ribonucleoprotein family protein	1	1	1	14.1	14.1	14.1	9.2547	0.0031447	6.1473	108310000	2	26.3692	25.7565	23.7302	19.0692	22.9832	18.4508
+	1.86562	5.07771	AT2G30860.1	AT2G30860	ATGSTF9, GLUTTR, ATGSTF7, GSTF9 | glutathione S-transferase PHI 9	1	1	1	12.6	12.6	12.6	24.146	0	7.2585	130140000	2	25.2484	24.1351	23.964	17.7455	18.8051	21.5637
+	1.33406	4.95436	AT2G39830.1	AT2G39830	DAR2	5	4	4	11.7	10.4	10.4	59.425	0	38.226	777540000	9	25.0825	28.2799	31.0488	22.9116	23.021	23.6155
+	1.7091	4.95226	AT4G23670.1	AT4G23670	Polyketide cyclase/dehydrase and lipid transport superfamily protein	1	1	1	7.3	7.3	7.3	17.518	0.0033501	6.3665	76563000	2	25.3288	22.7565	23.9124	20.9978	18.879	17.2641
+	2.31407	4.94334	AT1G15820.1	AT1G15820	LHCB6, CP24 | light harvesting complex photosystem II subunit 6	1	1	1	3.9	3.9	3.9	27.522	0	7.987	456500000	6	24.7596	25.5558	26.2706	20.0505	22.0838	19.6217
+	1.50875	4.80771	AT5G06600.2;AT5G06600.1;AT5G06600.3	AT5G06600	UBP12	16	16	8	16.5	16.5	7.7	130.48	0	102.9	740410000	15	21.7101	25.0078	24.5665	21.0348	17.6688	18.1577
+	1.10675	4.78405	AT4G25100.4;AT4G25100.5;AT4G25100.3;AT4G25100.2;AT4G25100.1	AT4G25100	FSD1 | Fe superoxide dismutase 1	2	2	2	14	14	14	21.098	0	13.141	177490000	2	28.3667	22.2847	22.3366	20.007	19.4103	19.2186
+	1.75941	4.76302	AT5G47990.1	AT5G47990	CYP705A5, THAD, THAD1 | cytochrome P450, family 705, subfamily A, polypeptide 5	10	10	8	25.2	25.2	21.7	58.44	0	64.194	965760000	12	21.524	24.023	25.6326	18.88	19.4072	18.6034
+	1.1821	4.75644	AT3G62030.3;AT3G62030.1;AT3G62030.2	AT3G62030	ROC4 | rotamase CYP 4	1	1	1	4.6	4.6	4.6	28.079	0	7.2212	66017000	1	26.5949	20.4654	21.8312	17.7483	17.9649	18.9091
+	2.61404	4.48719	AT1G13080.1	AT1G13080	CYP71B2 | cytochrome P450, family 71, subfamily B, polypeptide 2	1	1	1	2	2	2	57.14	0.0030534	6.0693	176500000	1	23.1711	23.918	22.7716	17.7093	19.0753	19.6146
+	1.59555	4.33821	AT1G65980.1	AT1G65980	TPX1 | thioredoxin-dependent peroxidase 1	1	1	1	5.6	5.6	5.6	17.428	0.0016863	6.4189	99461000	2	26.7962	22.5615	24.4005	20.0752	20.6998	19.9686
+	2.28096	4.21288	AT1G80070.1;AT4G38780.1	AT1G80070	SUS2, EMB33, EMB177, EMB14 | Pre-mRNA-processing-splicing factor	6	6	6	3.1	3.1	3.1	275.42	0	43.671	532850000	11	28.2478	27.5316	27.3159	23.493	24.7087	22.2549
+	2.32334	4.15927	AT1G80930.1	AT1G80930	MIF4G domain-containing protein / MA3 domain-containing protein	5	5	5	6.6	6.6	6.6	104.02	0	47.095	552300000	13	28.9511	28.3701	28.1931	23.0249	25.3863	24.6253
+	1.61888	4.15705	AT4G32760.1;AT4G32760.2	AT4G32760	ENTH/VHS/GAT family protein	1	1	1	2.1	2.1	2.1	72.963	0	10.877	78969000	4	26.3816	25.6211	22.6387	20.4363	21.2738	20.4602
+	1.1882	4.11836	AT3G28715.1;AT3G28710.1	AT3G28715	ATPase, V0/A0 complex, subunit C/D	1	1	1	5.7	5.7	5.7	40.787	0	22.243	226910000	3	19.7524	24.3917	24.3008	19.7951	17.9948	18.3
+	3.45076	4.07595	AT3G13160.1	AT3G13160	Tetratricopeptide repeat (TPR)-like superfamily protein	1	1	1	4.3	4.3	4.3	44.927	0	19.719	78697000	1	22.6281	22.6055	23.0756	18.0428	19.0889	18.9496
+	1.57745	4.05501	AT3G15000.1	AT3G15000	cobalt ion binding	1	1	1	2.8	2.8	2.8	42.869	0.003367	6.3756	74483000	2	22.5524	22.8077	25.748	20.4602	19.9737	18.5091
+	3.21808	4.05095	AT2G20890.1	AT2G20890	PSB29, THF1 | photosystem II reaction center PSB29 protein	1	1	1	2.7	2.7	2.7	33.795	0.004491	6.0092	71032000	1	23.2452	23.1719	23.4091	18.8831	18.7553	20.035
+	2.81918	3.96515	AT1G74960.3;AT1G74960.2;AT1G74960.1	AT1G74960	FAB1 | fatty acid biosynthesis 1	1	1	1	3.9	3.9	3.9	57.599	0	26.873	88957000	3	22.4884	23.0382	23.0402	18.852	18.0794	19.74
+	1.40262	3.86215	AT5G06550.1	AT5G06550	CONTAINS InterPro DOMAIN/s: Transcription factor jumonji/aspartyl beta-hydroxylase (InterPro:IPR003347), F-box domain, Skp2-like (InterPro:IPR022364), Transcription factor jumonji (InterPro:IPR013129);BEST Arabidopsis thaliana protein match i	1	1	1	3.8	3.8	3.8	57.419	0.0030488	6.0626	94571000	2	24.8684	24.8522	25.3718	22.0964	18.6535	22.7562
+	1.90262	3.81939	AT1G02150.1	AT1G02150	Tetratricopeptide repeat (TPR)-like superfamily protein	2	2	2	5	5	5	59.882	0	24.354	158590000	3	23.6041	24.1658	23.7576	21.7611	19.2048	19.1035
+	1.85058	3.80906	AT1G09340.1	AT1G09340	CRB, CSP41B, HIP1.3 | chloroplast RNA binding	1	1	1	3.7	3.7	3.7	42.619	0	10.795	39047000	1	23.7928	20.9701	23.5127	19.2794	18.8892	18.6799
+	1.34247	3.8089	AT1G73110.1	AT1G73110	P-loop containing nucleoside triphosphate hydrolases superfamily protein	2	2	2	7.4	7.4	7.4	48.325	0	18.642	68525000	5	19.5349	23.1706	23.7318	18.2545	18.6713	18.0848
+	2.41093	3.80329	AT4G11220.1	AT4G11220	BTI2, RTNLB2 | VIRB2-interacting protein 2	1	1	1	7	7	7	30.28	0	26.786	818090000	6	26.2313	26.4378	27.612	22.0372	23.5438	23.2902
+	1.17935	3.68972	AT5G03850.1;AT3G10090.1	AT5G03850	Nucleic acid-binding, OB-fold-like protein	1	1	1	18.8	18.8	18.8	7.3705	0	7.0527	176000000	3	26.7044	24.2596	25.1584	19.2604	23.6414	22.1514
+	1.38883	3.49869	AT5G42590.1	AT5G42590	CYP71A16 | cytochrome P450, family 71, subfamily A, polypeptide 16	12	12	12	37.4	37.4	37.4	55.627	0	120.55	1861300000	24	23.5506	25.1163	27.5127	21.8209	22.3272	21.5354
+	3.34617	3.4562	AT4G39960.1	AT4G39960	Molecular chaperone Hsp40/DnaJ family protein	2	2	1	6.5	6.5	4.7	48.031	0	24.644	29496000	3	22.396	22.4437	22.9498	19.238	18.624	19.5588
+	2.36899	3.45107	AT2G44060.2;AT2G44060.1	AT2G44060	Late embryogenesis abundant protein, group 2	14	14	14	50.2	50.2	50.2	36.036	0	197.52	3473700000	36	27.9494	28.6368	28.8952	24.3818	26.0658	24.6806
+	1.90339	3.41745	AT5G42270.1;AT1G50250.1	AT5G42270	VAR1, FTSH5 | FtsH extracellular protease family	1	1	1	1.6	1.6	1.6	75.231	0	7.8092	52288000	2	23.1414	22.5253	23.7938	18.4305	20.8366	19.9411
+	1.78255	3.3999	AT5G50850.1	AT5G50850	MAB1 | Transketolase family protein	1	1	1	3	3	3	39.175	0.0031596	6.161	110050000	1	23.74	23.1672	23.3991	20.8099	18.3583	20.9384
+	1.7302	3.3751	AT5G61780.1	AT5G61780	Tudor2, AtTudor2, TSN2 | TUDOR-SN protein 2	3	3	1	3.8	3.8	1.6	107.74	0	21.552	81765000	3	22.7657	20.4743	22.8296	18.4161	19.4631	18.0651
+	3.10437	3.37094	AT3G05590.1;AT5G27850.1	AT3G05590	RPL18 | ribosomal protein L18	4	4	4	25.1	25.1	25.1	20.925	0	42.205	974610000	7	28.4075	27.5375	28.0924	25.1725	24.3905	24.3616
+	1.29033	3.36199	ATCG00500.1	ATCG00500	ACCD | acetyl-CoA carboxylase carboxyl transferase subunit beta	1	1	1	2.3	2.3	2.3	55.609	0	6.5511	121440000	1	23.063	23.5333	23.7106	19.3712	22.4233	18.4264
+	1.93726	3.35119	AT1G47420.1	AT1G47420	SDH5 | succinate dehydrogenase 5	1	1	1	6.2	6.2	6.2	28.106	0	6.5402	65364000	1	22.7658	20.7742	22.2684	19.5147	18.194	18.046
+	1.28294	3.35049	AT2G20990.1;AT2G20990.2;AT2G20990.3	AT2G20990	SYTA, NTMC2TYPE1.1, ATSYTA, NTMC2T1.1, SYT1 | synaptotagmin A	3	3	3	8.5	8.5	8.5	61.743	0	44.385	194110000	3	20.3511	22.9681	23.7931	20.249	18.7769	18.035
+	1.30571	3.28032	AT4G34240.2;AT4G34240.1	AT4G34240	ALDH3I1, ALDH3 | aldehyde dehydrogenase 3I1	1	1	1	6.9	6.9	6.9	42.583	0.0032206	6.2426	125270000	1	24.8709	28.1028	24.5935	22.1649	23.2535	22.3079
+	1.92542	3.27074	ATCG00490.1	ATCG00490	RBCL | ribulose-bisphosphate carboxylases	12	12	12	23.4	23.4	23.4	52.954	0	145.16	5995400000	49	31.6485	29.5404	29.3588	26.9337	26.6718	27.1299
+	2.82461	3.254	AT5G17920.2;AT5G17920.1;AT3G03780.3;AT3G03780.2;AT3G03780.1	AT5G17920	ATCIMS | Cobalamin-independent synthase family protein	20	20	20	32	32	32	84.356	0	268.45	5741900000	61	29.7194	28.5562	29.53	25.5871	26.2834	26.1731
+	2.09767	3.18564	AT1G20620.5;AT1G20620.1;AT1G20620.4;AT1G20620.2	AT1G20620	CAT3, SEN2, ATCAT3 | catalase 3	6	6	5	13.8	13.8	10.9	55.967	0	38.591	394100000	10	25.467	24.6144	25.3228	22.867	22.1402	20.84
+	2.01478	3.17542	AT5G18380.2;AT5G18380.1;AT3G04230.1;AT5G18380.3	AT5G18380	Ribosomal protein S5 domain 2-like superfamily protein	4	4	1	22.9	22.9	6.9	16.544	0	32.79	702120000	8	28.4612	27.4332	27.0419	23.7246	25.51	24.1754
+	2.74103	3.16357	AT3G42050.1	AT3G42050	vacuolar ATP synthase subunit H family protein	4	4	4	13.4	13.4	13.4	50.284	0	108.42	459890000	8	23.465	23.9868	23.586	19.8062	20.5508	21.19
+	1.92792	3.14787	AT4G11420.1	AT4G11420	EIF3A, ATEIF3A-1, EIF3A-1, ATTIF3A1, TIF3A1 | eukaryotic translation initiation factor 3A	11	11	11	14.5	14.5	14.5	114.3	0	118.58	925620000	16	24.8763	26.6988	25.2432	21.9234	23.3585	22.0928
+	1.75671	3.11941	AT1G12310.1;AT1G62820.1	AT1G12310	Calcium-binding EF-hand family protein	2	2	2	16.9	16.9	16.9	16.517	0	11.358	138950000	2	21.2963	22.8107	22.9308	18.5271	18.7275	20.425
+	1.57482	3.11399	AT1G64790.1;AT1G64790.2	AT1G64790	ILA | ILITYHIA	16	16	16	8.6	8.6	8.6	284.78	0	157.92	1200300000	33	24.3072	25.0426	26.4451	21.3744	21.6197	23.4588
+	1.96779	3.1065	AT5G01530.1	AT5G01530	LHCB4.1 | light harvesting complex photosystem II	3	3	3	11	11	11	31.139	0	19.331	303360000	5	22.6033	21.8003	22.3486	19.9718	17.8681	19.5927
+	3.24467	3.09173	AT3G26650.1;AT1G12900.2;AT1G12900.4;AT1G12900.3;AT1G12900.1	AT3G26650	GAPA, GAPA-1 | glyceraldehyde 3-phosphate dehydrogenase A subunit	8	8	7	22.7	22.7	21	42.489	0	323.31	5437000000	25	29.3145	28.9735	29.5556	25.9336	26.7099	25.9249
+	2.54923	3.06863	AT1G60780.1;AT1G10730.1	AT1G60780	HAP13 | Clathrin adaptor complexes medium subunit family protein	2	2	2	6.3	6.3	6.3	49.032	0	25.453	125940000	4	23.1041	22.8352	22.9321	20.2888	18.9662	20.4105
+	2.5576	3.02469	AT2G39730.2;AT2G39730.3;AT2G39730.1	AT2G39730	RCA | rubisco activase	20	20	20	52.5	52.5	52.5	49.1	0	323.31	53950000000	66	31.2269	31.5166	32.5108	28.4361	29.2157	28.5285
+	2.60986	3.0091	AT3G58140.1	AT3G58140	phenylalanyl-tRNA synthetase class IIc family protein	1	1	1	2.8	2.8	2.8	49.251	0	10.124	100150000	4	22.2708	22.3673	22.7889	20.0659	19.6605	18.6732
+	2.07348	2.99232	AT5G57870.2;AT5G57870.1	AT5G57870	eIFiso4G1 | MIF4G domain-containing protein / MA3 domain-containing protein	4	4	4	7.1	7.1	7.1	85.157	0	64.453	414580000	8	22.8864	20.9783	22.5257	18.7627	19.4558	19.1949
+	1.54922	2.99101	AT4G10340.1	AT4G10340	LHCB5 | light harvesting complex of photosystem II 5	9	9	9	40.7	40.7	40.7	30.156	0	323.31	3927500000	26	26.8982	27.2615	29.035	23.5506	25.2694	25.4016
+	1.85054	2.93881	AT1G10670.4;AT1G10670.2;AT1G10670.1;AT1G09430.1;AT1G10670.3	AT1G10670	ACLA-1 | ATP-citrate lyase A-1	1	1	1	2.8	2.8	2.8	46.678	0	7.8811	51875000	3	22.1104	21.9673	22.4395	18.1438	20.517	19.0399
+	2.28652	2.93038	AT1G14710.2;AT1G14710.1	AT1G14710	hydroxyproline-rich glycoprotein family protein	2	2	2	4.5	4.5	4.5	66.203	0	12.787	44067000	3	20.7026	20.9485	22.0918	17.7567	18.3689	18.8262
+	2.22464	2.92412	AT1G56070.1	AT1G56070	LOS1 | Ribosomal protein S5/Elongation factor G/III/V family protein	14	14	14	25.6	25.6	25.6	93.89	0	217.1	4140200000	37	28.8157	27.5264	27.864	24.4866	25.8354	25.1117
+	2.28951	2.89183	AT1G70770.2;AT1G70770.1	AT1G70770	Protein of unknown function DUF2359, transmembrane	5	5	5	10	10	10	66.864	0	35.367	844660000	9	25.2207	25.272	25.1318	21.3949	23.1903	22.3637
+	1.92596	2.88916	AT3G26030.1	AT3G26030	ATB DELTA | serine/threonine protein phosphatase 2A 55 kDa regulatory subunit B prime delta	1	1	1	2.5	2.5	2.5	55.24	0	6.5559	44900000	1	21.3594	22.3305	22.443	19.5077	18.0536	19.9041
+	1.75445	2.81461	AT5G20090.3;AT5G20090.2;AT5G20090.1	AT5G20090	Uncharacterised protein family (UPF0041)	1	1	1	12.4	12.4	12.4	10.904	0	7.0469	24972000	2	19.6045	20.9112	18.5268	16.7748	17.2777	16.5461
+	2.8164	2.80703	AT5G28540.1;AT5G42020.1;AT5G42020.2	AT5G28540	BIP1 | heat shock protein 70 (Hsp 70) family protein	11	9	9	20.6	18.1	18.1	73.628	0	102.64	1454600000	18	27.4603	27.0216	27.144	23.8385	24.3531	25.0133
+	1.95709	2.8068	AT2G32920.1	AT2G32920	ATPDIL2-3, PDI9, ATPDI9, PDIL2-3 | PDI-like 2-3	2	2	2	6.1	6.1	6.1	47.754	0	17.922	245350000	5	24.4356	26.0914	25.0811	21.8933	23.1899	22.1044
+	3.24488	2.80581	AT5G02610.1;AT5G02610.2;AT2G39390.1	AT5G02610	Ribosomal L29 family protein	2	2	2	16.3	16.3	16.3	14.331	0	13.184	298020000	4	26.5676	25.6905	26.0494	23.1568	23.5356	23.1976
+	2.86509	2.80033	AT3G12780.1	AT3G12780	PGK1 | phosphoglycerate kinase 1	7	7	3	18.7	18.7	8.7	50.111	0	43.052	396140000	3	25.3573	24.2104	25.0776	22.1387	21.9371	22.1686
+	2.04613	2.69798	AT3G62530.1	AT3G62530	ARM repeat superfamily protein	5	5	5	33.9	33.9	33.9	24.503	0	79.975	885120000	9	25.4739	25.5122	26.9182	22.6584	23.4704	23.6815
+	1.98835	2.67104	AT5G19820.1	AT5G19820	emb2734 | ARM repeat superfamily protein	12	12	12	14.4	14.4	14.4	123.82	0	204	1353300000	33	25.7321	26.3925	26.0259	22.3935	23.439	24.3049
+	1.67494	2.6397	AT2G47650.1;AT3G62830.2;AT3G62830.1;AT2G47650.2	AT2G47650	UXS4 | UDP-xylose synthase 4	4	4	4	12.6	12.6	12.6	49.945	0	27.583	276630000	7	22.2802	23.2744	23.9996	21.3107	20.7587	19.5657
+	2.16657	2.63506	AT3G09440.2;AT3G09440.1	AT3G09440	Heat shock protein 70 (Hsp 70) family protein	14	4	3	23.7	5.7	4.6	71.147	0	61.317	374080000	7	25.7466	25.088	25.713	22.8868	22.0702	23.6855
+	1.75538	2.58753	AT4G34450.1	AT4G34450	coatomer gamma-2 subunit, putative / gamma-2 coat protein, putative / gamma-2 COP, putative	14	14	14	18.6	18.6	18.6	98.49	0	147.59	1767000000	39	27.2996	26.793	27.5827	23.4929	24.787	25.6328
+	2.18531	2.5778	AT3G14990.1;AT3G14990.3;AT3G14990.2	AT3G14990	Class I glutamine amidotransferase-like superfamily protein	2	2	2	9.2	9.2	9.2	41.857	0	40.163	200370000	5	25.014	24.6436	24.1749	21.2915	22.0181	22.7894
+	2.20049	2.54172	AT1G12840.1	AT1G12840	DET3, ATVHA-C | vacuolar ATP synthase subunit C (VATC) / V-ATPase C subunit / vacuolar proton pump C subunit (DET3)	2	2	2	11.2	11.2	11.2	42.619	0	17.21	784470000	10	25.3454	25.6434	26.3547	22.5126	23.4069	23.7988
+	1.75113	2.40319	AT4G16143.2;AT4G16143.1	AT4G16143	IMPA-2 | importin alpha isoform 2	6	4	4	17.6	13.8	13.8	58.906	0	64.593	1057100000	11	26.0182	26.2952	27.3202	23.3178	24.1436	24.9627
+	1.91531	2.37089	AT3G63400.2;AT3G63400.3;AT3G63400.1	AT3G63400	Cyclophilin-like peptidyl-prolyl cis-trans isomerase family protein	4	4	4	14.2	14.2	14.2	42.249	0	29.648	615270000	10	29.2328	28.9701	27.6023	26.4791	26.3867	25.8268
+	3.1121	2.33038	AT4G25630.1;AT5G52470.2	AT4G25630	FIB2, ATFIB2 | fibrillarin 2	6	1	1	23.8	3.4	3.4	33.653	0	6.9441	192020000	2	25.0977	24.5291	25.2933	22.5185	22.8565	22.554
+	2.11703	2.30746	AT5G55220.1	AT5G55220	trigger factor type chaperone family protein	3	3	3	5.9	5.9	5.9	61.733	0	23.558	310210000	7	24.0922	24.477	24.0231	21.0527	22.063	22.5543
+	2.10202	2.25975	AT3G09200.2;AT3G09200.1;AT2G40010.1;AT3G11250.1	AT3G09200	Ribosomal protein L10 family protein	3	3	3	18.1	18.1	18.1	30.618	0	30.491	1601000000	15	29.1862	27.8147	27.8976	26.1664	26.1451	25.8078
+	3.91358	2.20356	AT3G01390.2;AT3G01390.1	AT3G01390	VMA10, AVMA10 | vacuolar membrane ATPase 10	1	1	1	20.9	20.9	20.9	12.397	0	7.511	272440000	1	25.1499	25.0604	25.2078	22.8897	23.2029	22.7148
+	2.69204	2.18461	AT5G03290.1;AT3G09810.1	AT5G03290	IDH-V | isocitrate dehydrogenase V	4	4	4	13.6	13.6	13.6	40.624	0	37.85	401830000	10	23.261	23.5259	24.1217	21.171	21.7569	21.4269
+	2.29308	2.14937	AT2G09990.1	AT2G09990	Ribosomal protein S5 domain 2-like superfamily protein	4	1	1	22.6	6.8	6.8	16.631	0	6.9583	209720000	5	25.6153	24.5907	24.5722	22.7734	23.0791	22.4775
+	2.41206	2.00036	AT1G43710.1	AT1G43710	emb1075 | Pyridoxal phosphate (PLP)-dependent transferases superfamily protein	2	2	2	6.8	6.8	6.8	54.076	0	12.692	150260000	2	21.0801	21.6813	22.0748	19.7821	19.2811	19.772
