# Supplementary material for: UBP12 and UBP13 negatively regulate the activity of the ubiquitin-dependent peptidases DA1, DAR1 and DAR2
Source: eLife. 2020 Mar 25;9:e52276. doi: 10.7554/eLife.52276 (PMC7141810; doi:10.7554/eLife.52276)
Supplement: Figure 1—source data 2. [file elife-52276-fig1-data2.xlsx]

## Sheet: F1_FS2 MS-MS counts
	Repeat 1	Repeat 2	Repeat 3	mean	SEM
DA1	82	76	75	77.6667	2.18581
DAR1	35	33	43	37	3.05505
DAR2	1	3	5	3	1.1547

## Sheet: F1_FS3 Coverage DA1-DAR1-DAR2
	Repeat 1	Repeat 2	Repeat 3	mean	SEM
DA1	38.9	31.8	38.9	36.5333	2.36667
DAR1	36.5	33.8	36.5	35.6	0.9
DAR2	5.3	8.3	10.4	8	1.47986

## Sheet: F1_FS4 Relative expression
Delta-delta-CT
	DA1			UBP12			UBP13			DAR1			DAR2
	R1	R2	R3	R1	R2	R3	R1	R2	R3	R1	R2	R3	R1	R2	R3
D5	3.09517	2.7675	3.45917	0.670167	-0.7285	0.633667	0.872167	-0.642	1.91417	2.20633	2.03783	2.42567	6.10833	6.49383	7.55367
D6	2.64533	2.22417	2.05283	-0.598167	-0.361333	-0.768167	-0.292667	-0.220833	-0.0821667	1.48867	1.35583	1.27933	5.27067	4.50383	4.58833
D7	1.88817	1.85117	1.75033	-0.123833	-0.544833	-0.477167	-0.160833	-0.175333	-0.112167	1.30167	1.45617	1.383	5.88367	5.05267	4.979
D8	1.631	1.9385	2.14083	-0.097	-0.7065	-0.587167	0.201	-0.207	0.900833	0.8735	1.30733	1.2065	4.5655	4.72083	4.847
D9	1.4535	2.0705	1.694	-0.494	-0.2395	-0.587	-0.272	0.738	0.275	1.04933	1.56183	1.2135	4.03483	5.21183	4.6855
D10	1.9185	1.55033	1.31033	-0.4705	-0.897167	-0.982167	0.0215	-0.219167	0.253333	1.242	0.892333	1.28567	3.9115	3.89433	4.16317
D11	1.366	1.48433	1.5375	-1.165	-0.903667	-0.667	0.2455	0.219833	0.5115	0.666333	1.08183	0.857	4.38933	4.10833	4.258
D12	1.2	1.2735	1.35417	-0.9745	-0.657	-0.331833	-0.009	0.023	0.297167	0.852667	0.642	0.907333	4.13517	3.233	4.76633
D13	1.21833	1.59033	1.70917	-1.17667	-0.826167	-0.736833	-0.176667	0.259833	0.589667	0.529167	0.667333	0.8325	3.32517	3.40133	4.012
D14	0.626667	1.31867	1.35167	-0.986333	-0.716833	-0.604833	-0.100333	0.401667	0.460167	0.868167	0.912667	0.375667	3.74367	3.43817	3.77667
D15	1.00767	0.856	0.593333	-0.941833	-1.364	-0.992167	0.373167	0.0755	0.110833	0.504167	0.842833	0.688667	3.47267	3.84533	3.75617
D17	0.726167	0.408	0.861333	-0.673333	-0.8825	-0.863667	1.05567	0.1395	0.334833	1.02783	0.644	0.718333	5.05833	3.681	4.07133
D19	1.36033	1.09367	0.672333	-0.379167	-0.807833	-0.906167	0.725833	0.224667	-0.197667	0.773833	0.725	0.44	5.17133	4.239	4.186
D21	0.794	0.6805	0.851	-0.2	-0.95	-0.612	0.845	-0.042	0.8505	0.965167	0.467333	0.593	5.19867	5.15583	6.0545
Minus Average
	DA1			UBP12			UBP13			DAR1			DAR2
	mean	SEM		mean	SEM		mean	SEM		mean	SEM		mean	SEM
D5	-3.10728	0.199759		-0.191778	0.46026		-0.714778	0.742086		-2.22328	0.112278		-6.71861	0.432104
D6	-2.30744	0.176035		0.575889	0.11797		0.198556	0.0617786		-1.37461	0.0611544		-4.78761	0.242756
D7	-1.82989	0.0411868		0.381944	0.130525		0.149444	0.0191031		-1.38028	0.0446211		-5.30511	0.290058
D8	-1.90344	0.148216		0.463556	0.186487		-0.298278	0.323482		-1.12911	0.131078		-4.71111	0.0814073
D9	-1.73933	0.179549		0.440167	0.103863		-0.247	0.291898		-1.27489	0.151097		-4.64406	0.340402
D10	-1.59306	0.176857		0.783278	0.158302		-0.0185556	0.136407		-1.14	0.124473		-3.98967	0.0868914
D11	-1.46261	0.0506852		0.911889	0.143819		-0.325611	0.0932393		-0.868389	0.12008		-4.25189	0.0811752
D12	-1.27589	0.0445201		0.654444	0.185526		-0.103722	0.0971623		-0.800667	0.0808877		-4.04483	0.444934
D13	-1.50594	0.147841		0.913222	0.134223		-0.224278	0.221935		-0.676333	0.0876803		-3.5795	0.217365
D14	-1.099	0.236359		0.769333	0.113215		-0.253833	0.177887		-0.718833	0.172064		-3.65283	0.107755
D15	-0.819	0.12103		1.09933	0.133129		-0.1865	0.093889		-0.678556	0.0978953		-3.69139	0.11235
D17	-0.665167	0.134373		0.8065	0.0668049		-0.51	0.278599		-0.796722	0.117531		-4.27022	0.409849
D19	-1.04211	0.200274		0.697722	0.161788		-0.250944	0.266915		-0.646278	0.104098		-4.53211	0.319977
D21	-0.775167	0.0501118		0.587333	0.216857		-0.551167	0.296588		-0.675167	0.149469		-5.46967	0.292678
Relative expression to the lowest value
	DA1			UBP12			UBP13			DAR1			DAR2
	mean	SEM		mean	SEM		mean	SEM		mean	SEM		mean	SEM
D5	3.61133	0.199759		6.52683	0.46026		6.00383	0.742086		4.49533	0.112278		0	0.432104
D6	4.41117	0.176035		7.2945	0.11797		6.91717	0.0617786		5.344	0.0611544		1.931	0.242756
D7	4.88872	0.0411868		7.10056	0.130525		6.86806	0.0191031		5.33833	0.0446211		1.4135	0.290058
D8	4.81517	0.148216		7.18217	0.186487		6.42033	0.323482		5.5895	0.131078		2.0075	0.0814073
D9	4.97928	0.179549		7.15878	0.103863		6.47161	0.291898		5.44372	0.151097		2.07456	0.340402
D10	5.12556	0.176857		7.50189	0.158302		6.70006	0.136407		5.57861	0.124473		2.72894	0.0868914
D11	5.256	0.0506852		7.6305	0.143819		6.393	0.0932393		5.85022	0.12008		2.46672	0.0811752
D12	5.44272	0.0445201		7.37306	0.185526		6.61489	0.0971623		5.91794	0.0808877		2.67378	0.444934
D13	5.21267	0.147841		7.63183	0.134223		6.49433	0.221935		6.04228	0.0876803		3.13911	0.217365
D14	5.61961	0.236359		7.48794	0.113215		6.46478	0.177887		5.99978	0.172064		3.06578	0.107755
D15	5.89961	0.12103		7.81794	0.133129		6.53211	0.093889		6.04006	0.0978953		3.02722	0.11235
D17	6.05344	0.134373		7.52511	0.0668049		6.20861	0.278599		5.92189	0.117531		2.44839	0.409849
D19	5.6765	0.200274		7.41633	0.161788		6.46767	0.266915		6.07233	0.104098		2.1865	0.319977
D21	5.94344	0.0501118		7.30594	0.216857		6.16744	0.296588		6.04344	0.149469		1.24894	0.292678
