# Supplementary material for: UBP12 and UBP13 negatively regulate the activity of the ubiquitin-dependent peptidases DA1, DAR1 and DAR2
Source: eLife. 2020 Mar 25;9:e52276. doi: 10.7554/eLife.52276 (PMC7141810; doi:10.7554/eLife.52276)
Supplement: Figure 2—source data 1. [file elife-52276-fig2-data1.xlsx]

## Sheet: F2B Leaf area ubp12-2
Leaf area data								Statistical analysis
	ubp12-2			Col-0
	R1	R2	R3	R1	R2	R3		Table Analyzed	ubp12-2 vs Col-0
cot	11.2478	11.3726	11.6877	10.586	10.6926	13.3194
1-2	51.0796	49.7922	51.0358	53.7436	52.1474	62.7601		Two-way ANOVA	Ordinary
3	122.759	123.996	105.019	170.67	158.462	168.358		Alpha	0.05
4	152.784	169.183	126.501	223.27	226.385	218.583
5	198.929	213.907	170.672	293.865	293.009	288.394		Source of Variation	% of total variation	P value	P value summary	Significant?
6	245.59	254.118	204.898	343.646	322.957	330.529		Interaction	3.095	0.0045	**	Yes
7	273.196	304.565	246.806	348.718	357.179	352.365		Row Factor	88.34	<0,0001	****	Yes
8	327.67	327.268	272.02	370.432	342.243	385.706		Column Factor	4.175	<0,0001	****	Yes
9	304.104	309.922	245.15	292.536	308.158	342.977
10	231.343	269.43	215.275	218.401	233.389	277.722		ANOVA table	SS	DF	MS	F (DFn, DFd)	P value
11	112.761	267.482	212.05	158.478	163.636	249.047		Interaction	23578	10	2358	F (10, 44) = 3,100	P=0,0045
12			58.913	71.8554	96.1726	143.276		Row Factor	672863	10	67286	F (10, 44) = 88,45	P<0,0001
13				25.5237	34.827	87.9875		Column Factor	31801	1	31801	F (1, 44) = 41,81	P<0,0001
14				11.027				Residual	33470	44	760.7
15
								Difference between column means
								Mean of ubp12-2	187.7
								Mean of Col-0	231.6
								Difference between means	-43.9
								SE of difference	6.79
								95% CI of difference	-57,59 to -30,22
								Compare each cell mean with the other cell mean in that row
								Number of families	1
								Number of comparisons per family	11
								Alpha	0.05
								Sidak's multiple comparisons test	Mean Diff,	95,00% CI of diff,	Significant?	Summary	Adjusted P Value
								ubp12-2 - Col-0
								cot	-0.09664	-67,25 to 67,06	No	ns	>0,9999
								1-2	-5.581	-72,74 to 61,58	No	ns	>0,9999
								3	-48.57	-115,7 to 18,59	No	ns	0.3358
								4	-73.26	-140,4 to -6,100	Yes	*	0.0239
								5	-97.25	-164,4 to -30,10	Yes	***	0.001
								6	-97.51	-164,7 to -30,35	Yes	***	0.0009
								7	-77.9	-145,1 to -10,74	Yes	*	0.0133
								8	-57.14	-124,3 to 10,02	No	ns	0.1512
								9	-28.17	-95,32 to 38,99	No	ns	0.9328
								10	-4.488	-71,65 to 62,67	No	ns	>0,9999
								11	7.044	-60,11 to 74,20	No	ns	>0,9999
								Test details	Mean 1	Mean 2	Mean Diff,	SE of diff,	N1	N2	t	DF
								ubp12-2 - Col-0
								cot	11.44	11.53	-0.09664	22.52	3	3	0.004291	44
								1-2	50.64	56.22	-5.581	22.52	3	3	0.2478	44
								3	117.3	165.8	-48.57	22.52	3	3	2.157	44
								4	149.5	222.7	-73.26	22.52	3	3	3.253	44
								5	194.5	291.8	-97.25	22.52	3	3	4.319	44
								6	234.9	332.4	-97.51	22.52	3	3	4.33	44
								7	274.9	352.8	-77.9	22.52	3	3	3.459	44
								8	309	366.1	-57.14	22.52	3	3	2.537	44
								9	286.4	314.6	-28.17	22.52	3	3	1.251	44
								10	238.7	243.2	-4.488	22.52	3	3	0.1993	44
								11	197.4	190.4	7.044	22.52	3	3	0.3128	44

## Sheet: F2C Leaf area analysis OE lines
Leaf area measurements (green samples were selected for cellular analysis, based on the difference from the mean)
code	Line	Repeat	Plant	Leaf area (LA) mm2	Difference from mean (mm2)	Mean LA/repeat (mm2)	stdev LA
2_2-3-7	35S::UBP13_2.3	1	1	22.61	0.887571	23.4976	4.74618
2_2-3-7	35S::UBP13_2.3	1	2	19.43	4.06757
2_2-3-7	35S::UBP13_2.3	1	3	25.07	-1.57243
2_2-3-7	35S::UBP13_2.3	1	4	23.08	0.417571
2_2-3-7	35S::UBP13_2.3	1	5	18.947	4.55057
2_2-3-7	35S::UBP13_2.3	1	6	33.132	-9.63443
2_2-3-7	35S::UBP13_2.3	1	7	22.214	1.28357
2_2-3-7	35S::UBP13_2.3	2	1	26.404	-1.27288	25.1311	5.49378
2_2-3-7	35S::UBP13_2.3	2	2	21.681	3.45012
2_2-3-7	35S::UBP13_2.3	2	3	17.447	7.68412
2_2-3-7	35S::UBP13_2.3	2	4	26.672	-1.54088
2_2-3-7	35S::UBP13_2.3	2	5	23.935	1.19612
2_2-3-7	35S::UBP13_2.3	2	6	35.91	-10.7789
2_2-3-7	35S::UBP13_2.3	2	7	21.507	3.62412
2_2-3-7	35S::UBP13_2.3	2	8	27.493	-2.36188
2_2-3-7	35S::UBP13_2.3	3	1	34.318	-8.43843	25.8796	4.65149
2_2-3-7	35S::UBP13_2.3	3	2	28.235	-2.35543
2_2-3-7	35S::UBP13_2.3	3	3	22.625	3.25457
2_2-3-7	35S::UBP13_2.3	3	4	26.797	-0.917429
2_2-3-7	35S::UBP13_2.3	3	5	20.306	5.57357
2_2-3-7	35S::UBP13_2.3	3	6	22.648	3.23157
2_2-3-7	35S::UBP13_2.3	3	7	26.228	-0.348429
2_1-1-2	35S::UBP13_1.1	1	1	27.988	0.01125	27.9993	5.61781
2_1-1-2	35S::UBP13_1.1	1	2	20.742	7.25725
2_1-1-2	35S::UBP13_1.1	1	3	34.426	-6.42675
2_1-1-2	35S::UBP13_1.1	1	4	28.841	-0.84175
2_1-1-2	35S::UBP13_1.1	2	1	18.347	7.30743	25.6544	6.86805
2_1-1-2	35S::UBP13_1.1	2	2	14.719	10.9354
2_1-1-2	35S::UBP13_1.1	2	3	27.882	-2.22757
2_1-1-2	35S::UBP13_1.1	2	4	30.57	-4.91557
2_1-1-2	35S::UBP13_1.1	2	5	34.491	-8.83657
2_1-1-2	35S::UBP13_1.1	2	6	27.152	-1.49757
2_1-1-2	35S::UBP13_1.1	2	7	26.42	-0.765571
2_1-1-2	35S::UBP13_1.1	3	1	43.891	-19.6887	24.2022	9.06452
2_1-1-2	35S::UBP13_1.1	3	2	21.347	2.85525
2_1-1-2	35S::UBP13_1.1	3	3	17.012	7.19025
2_1-1-2	35S::UBP13_1.1	3	4	24.108	0.09425
2_1-1-2	35S::UBP13_1.1	3	5	28.739	-4.53675
2_1-1-2	35S::UBP13_1.1	3	6	19.697	4.50525
2_1-1-2	35S::UBP13_1.1	3	7	23.933	0.26925
2_1-1-2	35S::UBP13_1.1	3	8	14.891	9.31125
2_3-1-1	Col-0	1	1	33.961	4.47754	38.4385	7.20875
2_3-1-1	Col-0	1	2	39.39	-0.951462
2_3-1-1	Col-0	1	3	39.791	-1.35246
2_3-1-1	Col-0	1	4	46.938	-8.49946
2_3-1-1	Col-0	1	5	31.961	6.47754
2_3-1-1	Col-0	1	6	32.697	5.74154
2_3-1-1	Col-0	1	7	52.584	-14.1455
2_3-1-1	Col-0	1	8	32.677	5.76154
2_3-1-1	Col-0	1	9	41.198	-2.75946
2_3-1-1	Col-0	1	10	45.403	-6.96446
2_3-1-1	Col-0	1	11	25.734	12.7045
2_3-1-1	Col-0	1	12	37.519	0.919538
2_3-1-1	Col-0	1	13	39.848	-1.40946
2_3-1-1	Col-0	2	1	38.425	-1.76858	36.6564	8.21157
2_3-1-1	Col-0	2	2	39.166	-2.50958
2_3-1-1	Col-0	2	3	37.547	-0.890583
2_3-1-1	Col-0	2	4	40.671	-4.01458
2_3-1-1	Col-0	2	5	42.631	-5.97458
2_3-1-1	Col-0	2	6	54.069	-17.4126
2_3-1-1	Col-0	2	7	31.438	5.21842
2_3-1-1	Col-0	2	8	25.975	10.6814
2_3-1-1	Col-0	2	9	31.556	5.10042
2_3-1-1	Col-0	2	10	36.525	0.131417
2_3-1-1	Col-0	2	11	39.414	-2.75758
2_3-1-1	Col-0	2	12	22.46	14.1964
2_3-1-1	Col-0	3	1	46.457	-4.48283	41.9742	4.77977
2_3-1-1	Col-0	3	2	45.543	-3.56883
2_3-1-1	Col-0	3	3	39.05	2.92417
2_3-1-1	Col-0	3	4	46.389	-4.41483
2_3-1-1	Col-0	3	5	46.003	-4.02883
2_3-1-1	Col-0	3	6	38.055	3.91917
2_3-1-1	Col-0	3	7	38.865	3.10917
2_3-1-1	Col-0	3	8	39.274	2.70017
2_3-1-1	Col-0	3	9	40.904	1.07017
2_3-1-1	Col-0	3	10	45.556	-3.58183
2_3-1-1	Col-0	3	11	31.458	10.5162
2_3-1-1	Col-0	3	12	46.136	-4.16183
2_3-1-1	35S::UBP12_3.1	1	1	29.898	-3.13278	26.7652	5.73855
2_3-1-1	35S::UBP12_3.1	1	2	33.613	-6.84778
2_3-1-1	35S::UBP12_3.1	1	3	32.81	-6.04478
2_3-1-1	35S::UBP12_3.1	1	4	23.449	3.31622
2_3-1-1	35S::UBP12_3.1	1	5	25.476	1.28922
2_3-1-1	35S::UBP12_3.1	1	6	21.331	5.43422
2_3-1-1	35S::UBP12_3.1	1	7	28.552	-1.78678
2_3-1-1	35S::UBP12_3.1	1	8	16.001	10.7642
2_3-1-1	35S::UBP12_3.1	1	9	29.757	-2.99178
2_3-1-1	35S::UBP12_3.1	2	1	32.331	0.0763846	32.4074	7.02671
2_3-1-1	35S::UBP12_3.1	2	2	32.129	0.278385
2_3-1-1	35S::UBP12_3.1	2	3	33.6	-1.19262
2_3-1-1	35S::UBP12_3.1	2	4	46.426	-14.0186
2_3-1-1	35S::UBP12_3.1	2	5	45.616	-13.2086
2_3-1-1	35S::UBP12_3.1	2	6	30.224	2.18338
2_3-1-1	35S::UBP12_3.1	2	7	31.378	1.02938
2_3-1-1	35S::UBP12_3.1	2	8	28.959	3.44838
2_3-1-1	35S::UBP12_3.1	2	9	19.224	13.1834
2_3-1-1	35S::UBP12_3.1	2	10	30.303	2.10438
2_3-1-1	35S::UBP12_3.1	2	11	33.039	-0.631615
2_3-1-1	35S::UBP12_3.1	2	12	28.367	4.04038
2_3-1-1	35S::UBP12_3.1	2	13	29.7	2.70738
2_3-1-1	35S::UBP12_3.1	3	1	38.429	-9.9188	28.5102	7.53728
2_3-1-1	35S::UBP12_3.1	3	2	30.293	-1.7828
2_3-1-1	35S::UBP12_3.1	3	3	24.223	4.2872
2_3-1-1	35S::UBP12_3.1	3	4	36.885	-8.3748
2_3-1-1	35S::UBP12_3.1	3	5	28.157	0.3532
2_3-1-1	35S::UBP12_3.1	3	6	32.275	-3.7648
2_3-1-1	35S::UBP12_3.1	3	7	26.599	1.9112
2_3-1-1	35S::UBP12_3.1	3	8	23.385	5.1252
2_3-1-1	35S::UBP12_3.1	3	9	32.503	-3.9928
2_3-1-1	35S::UBP12_3.1	3	10	12.353	16.1572
2_3-2-6	Col-0	1	1	44.379	-0.837333	43.5417	3.99481
2_3-2-6	Col-0	1	2	44.946	-1.40433
2_3-2-6	Col-0	1	3	43.035	0.506667
2_3-2-6	Col-0	1	4	42.997	0.544667
2_3-2-6	Col-0	1	5	46.372	-2.83033
2_3-2-6	Col-0	1	6	48.544	-5.00233
2_3-2-6	Col-0	1	7	39.914	3.62767
2_3-2-6	Col-0	1	8	49.25	-5.70833
2_3-2-6	Col-0	1	9	34.586	8.95567
2_3-2-6	Col-0	1	10	40.137	3.40467
2_3-2-6	Col-0	1	11	43.48	0.0616667
2_3-2-6	Col-0	1	12	44.86	-1.31833
2_3-2-6	Col-0	2	1	44.811	-4.49683	40.3142	6.69436
2_3-2-6	Col-0	2	2	32.292	8.02217
2_3-2-6	Col-0	2	3	33.441	6.87317
2_3-2-6	Col-0	2	4	52.558	-12.2438
2_3-2-6	Col-0	2	5	50.371	-10.0568
2_3-2-6	Col-0	2	6	45.846	-5.53183
2_3-2-6	Col-0	2	7	34.308	6.00617
2_3-2-6	Col-0	2	8	34.883	5.43117
2_3-2-6	Col-0	2	9	39.214	1.10017
2_3-2-6	Col-0	2	10	38.102	2.21217
2_3-2-6	Col-0	2	11	40.423	-0.108833
2_3-2-6	Col-0	2	12	37.521	2.79317
2_3-2-6	Col-0	3	1	47.688	-7.14942	40.5386	8.56409
2_3-2-6	Col-0	3	2	29.688	10.8506
2_3-2-6	Col-0	3	3	33.295	7.24358
2_3-2-6	Col-0	3	4	33.906	6.63258
2_3-2-6	Col-0	3	5	37.032	3.50658
2_3-2-6	Col-0	3	6	40.648	-0.109417
2_3-2-6	Col-0	3	7	49.941	-9.40242
2_3-2-6	Col-0	3	8	56.115	-15.5764
2_3-2-6	Col-0	3	9	33.904	6.63458
2_3-2-6	Col-0	3	10	49.956	-9.41742
2_3-2-6	Col-0	3	11	32.541	7.99758
2_3-2-6	Col-0	3	12	41.749	-1.21042
2_3-2-6	35S::UBP12_2.3	1	1	28.071	-0.8705	27.2005	3.35768
2_3-2-6	35S::UBP12_2.3	1	2	28.339	-1.1385
2_3-2-6	35S::UBP12_2.3	1	3	31.958	-4.7575
2_3-2-6	35S::UBP12_2.3	1	4	28.398	-1.1975
2_3-2-6	35S::UBP12_2.3	1	5	25.391	1.8095
2_3-2-6	35S::UBP12_2.3	1	6	25.935	1.2655
2_3-2-6	35S::UBP12_2.3	1	7	29.113	-1.9125
2_3-2-6	35S::UBP12_2.3	1	8	27.847	-0.6465
2_3-2-6	35S::UBP12_2.3	1	9	24.614	2.5865
2_3-2-6	35S::UBP12_2.3	1	10	28.519	-1.3185
2_3-2-6	35S::UBP12_2.3	1	11	18.569	8.6315
2_3-2-6	35S::UBP12_2.3	1	12	29.652	-2.4515
2_3-2-6	35S::UBP12_2.3	2	1	32.507	-1.54606	30.9609	2.74562
2_3-2-6	35S::UBP12_2.3	2	2	30.661	0.299937
2_3-2-6	35S::UBP12_2.3	2	3	30.263	0.697937
2_3-2-6	35S::UBP12_2.3	2	4	31.135	-0.174063
2_3-2-6	35S::UBP12_2.3	2	5	30.817	0.143937
2_3-2-6	35S::UBP12_2.3	2	6	31.996	-1.03506
2_3-2-6	35S::UBP12_2.3	2	7	31.133	-0.172063
2_3-2-6	35S::UBP12_2.3	2	8	29.944	1.01694
2_3-2-6	35S::UBP12_2.3	2	9	33.333	-2.37206
2_3-2-6	35S::UBP12_2.3	2	10	24.695	6.26594
2_3-2-6	35S::UBP12_2.3	2	11	33.372	-2.41106
2_3-2-6	35S::UBP12_2.3	2	12	35.131	-4.17006
2_3-2-6	35S::UBP12_2.3	2	13	26.61	4.35094
2_3-2-6	35S::UBP12_2.3	2	14	32.543	-1.58206
2_3-2-6	35S::UBP12_2.3	2	15	33.631	-2.67006
2_3-2-6	35S::UBP12_2.3	2	16	27.604	3.35694
2_3-2-6	35S::UBP12_2.3	3	1	32.387	-4.84318	27.5438	4.56817
2_3-2-6	35S::UBP12_2.3	3	2	25.186	2.35782
2_3-2-6	35S::UBP12_2.3	3	3	27.375	0.168818
2_3-2-6	35S::UBP12_2.3	3	4	27.055	0.488818
2_3-2-6	35S::UBP12_2.3	3	5	36.538	-8.99418
2_3-2-6	35S::UBP12_2.3	3	6	28.877	-1.33318
2_3-2-6	35S::UBP12_2.3	3	7	24.234	3.30982
2_3-2-6	35S::UBP12_2.3	3	8	25.898	1.64582
2_3-2-6	35S::UBP12_2.3	3	9	24.137	3.40682
2_3-2-6	35S::UBP12_2.3	3	10	31.316	-3.77218
2_3-2-6	35S::UBP12_2.3	3	11	19.979	7.56482

## Sheet: F2C Cellular analysis OE lines
Pavement cell areas							Average of LN Pavement cell area (um2) per drawing					Total pavement number, average pavement cell area and leaf area per leaf calculations
image cell drawing	genotype	Pavement cell area (pixel)	Pavement cell area (µm2)	LN Pavement cell area (µm2)			image cell drawing	genotype	Average of LN Pavement cell area (µm2)			repeat	line	leaf number	number of cells/drawing	Drawn area (pixel)	Drawn area (µm2)	Leaf area (mm2)	Average leaf area	Stdev. Leaf area	Leaf area (µm2)	number of stomata/drawing	Stomata per leaf	Stomatal density	Stomatal index	guard cells / drawing	pavement cell number / drawing	Extrapolation factor	Total cell number/leaf	pavement cell number/leaf	average pavement cell number	stdev. pavement cell number	Line	LN average pavement cell area (µm2)	Average pavement cell area (µm2)	average pavement cell area/line	stdev. pavement cell area/line
p35S-UBP12_3-2-4_WT_R1_11.jpg	Col-0	5487.5	503.597	6.22178			p35S-UBP12_3-2-4_WT_R1_11.jpg	Col-0	6.48434			R1	Col-0	L3	199	2031500	186434	37.519			37519000	47	9458.52	252.1	30.9211	94	105	201.245	40047.8	21130.7				6.65694	778.165
p35S-UBP12_3-2-4_WT_R1_11.jpg	Col-0	2603.5	238.928	5.47616			p35S-UBP12_3-2-4_WT_R1_3.jpg	Col-0	6.56846			R1	Col-0	L3	172	2044830	187658	39.39	38.9	1.21267	39390000	35	7346.62	186.51	25.5474	70	102	209.904	36103.4	21410.2	21827.3	974.544	Col-0	6.82639	921.856	760.095	171.512
p35S-UBP12_3-2-4_WT_R1_11.jpg	Col-0	2601	238.698	5.4752			p35S-UBP12_3-2-4_WT_R1_4.jpg	Col-0	6.85233			R1	Col-0	L3	178	2003410	183856	39.791			39791000	36	7791.28	195.805	25.3521	72	106	216.424	38523.5	22941				6.36348	580.264
p35S-UBP12_3-2-4_WT_R1_11.jpg	Col-0	12581	1154.58	7.05149			p35S-UBP12_3-2-4_WT_R2_10.jpg	Col-0	6.13719			R2	Col-0	L3	213	1995020	183086	38.425			38425000	44	9234.44	240.324	26.0355	88	125	209.874	44703.1	26234.2				6.46451	641.951
p35S-UBP12_3-2-4_WT_R1_11.jpg	Col-0	3660.5	335.93	5.8169			p35S-UBP12_3-2-4_WT_R2_11.jpg	Col-0	6.17996			R2	Col-0	L3	227	1892030	173635	36.525	37.499	0.950909	36525000	48	10097	276.442	26.8156	96	131	210.355	47750.6	27556.5	27182.7	827.53	Col-0	6.29022	539.27	599.076	53.3931
p35S-UBP12_3-2-4_WT_R1_11.jpg	Col-0	4859.5	445.965	6.10024			p35S-UBP12_3-2-4_WT_R2_9.jpg	Col-0	6.28222			R2	Col-0	L3	212	1975120	181260	37.547			37547000	39	8078.62	215.16	22.5434	78	134	207.144	43914.6	27757.3				6.42326	616.008
p35S-UBP12_3-2-4_WT_R1_11.jpg	Col-0	16795	1541.31	7.34039			p35S-UBP12_3-2-4_WT_R3_12.jpg	Col-0	6.11072			R3	Col-0	L3	208	2133180	195766	39.05			39050000	39	7779.46	199.218	23.0769	78	130	199.473	41490.4	25931.5				6.49599	662.482
p35S-UBP12_3-2-4_WT_R1_11.jpg	Col-0	24812	2277.04	7.73063			p35S-UBP12_3-2-4_WT_R3_5.jpg	Col-0	6.20972			R3	Col-0	L3	202	1944780	178476	39.274	39.7427	1.01196	39274000	38	8361.98	212.914	23.1707	76	126	220.052	44450.5	27726.6	27401.1	1336.85	Col-0	6.51302	673.859	666.936	6.0768
p35S-UBP12_3-2-4_WT_R1_11.jpg	Col-0	101504	9315.2	9.1394			p35S-UBP12_3-2-4_WT_R3_6.jpg	Col-0	6.33995			R3	Col-0	L3	184	1811270	166223	40.904			40904000	34	8366.67	204.544	22.6667	68	116	246.078	45278.4	28545.1				6.49899	664.468
p35S-UBP12_3-2-4_WT_R1_11.jpg	Col-0	5281	484.647	6.18342			R1-35S-UBP12-homo-1.jpg	35S::UBP12_3.2	6.58372			R1	Col-0	L3	153	1762600	161757	43.48			43480000	30	8063.95	185.464	24.3902	60	93	268.798	41126.2	24998.3				6.48434	654.81
p35S-UBP12_3-2-4_WT_R1_11.jpg	Col-0	1764	161.885	5.08689			R1-35S-UBP12-homo-2.jpg	35S::UBP12_3.2	6.1678			R1	Col-0	L3	221	2088760	191689	43.035	43.1707	0.268563	43035000	43	9653.68	224.322	24.1573	86	135	224.504	49615.4	30308.1	26103.9	3774.85	Col-0	6.56846	712.275	771.055	154.275
p35S-UBP12_3-2-4_WT_R1_11.jpg	Col-0	48569.5	4457.31	8.4023			R1-35S-UBP12-homo-4.jpg	35S::UBP12_3.2	6.06561			R1	Col-0	L3	162	1955120	179425	42.997			42997000	33	7908.06	183.921	25.5814	66	96	239.638	38821.4	23005.3				6.85233	946.079
p35S-UBP12_3-2-4_WT_R1_11.jpg	Col-0	1311.5	120.359	4.79048			R1-35S-UBP12-homo-6.jpg	35S::UBP12_3.2	5.96049			R2	Col-0	L3	213	1798470	165049	38.102			38102000	39	9003.27	236.294	22.4138	78	135	230.853	49171.7	31165.2				6.13719	462.754
p35S-UBP12_3-2-4_WT_R1_11.jpg	Col-0	1567.5	143.852	4.96879			R1-35S-UBP12-homo-8.jpg	35S::UBP12_3.2	6.33231			R2	Col-0	L3	244	1965370	180365	40.423	39.2463	1.16084	40423000	47	10533.5	260.582	23.8579	94	150	224.117	54684.6	33617.6	32080.7	1339.1	Col-0	6.17996	482.971	493.566	37.2575
p35S-UBP12_3-2-4_WT_R1_11.jpg	Col-0	724.5	66.4886	4.19703			R2-35S-UBP12-homo-2.jpg	35S::UBP12_3.2	6.0821			R2	Col-0	L3	202	1765740	162045	39.214			39214000	36	8711.8	222.16	21.6867	72	130	241.994	48882.9	31459.3				6.28222	534.974
p35S-UBP12_3-2-4_WT_R1_11.jpg	Col-0	50092	4597.03	8.43317			R2-35S-UBP12-homo-3.jpg	35S::UBP12_3.2	6.09498			R3	Col-0	L3	230	1863590	171025	41.749			41749000	44	10740.9	257.272	23.6559	88	142	244.111	56145.5	34663.7				6.11072	450.664
p35S-UBP12_3-2-4_WT_R1_11.jpg	Col-0	1312	120.405	4.79086			R2-35S-UBP12-homo-5.jpg	35S::UBP12_3.2	6.03424			R3	Col-0	L3	241	1833140	168230	37.032	39.8097	2.46772	37032000	46	10125.8	273.434	23.5897	92	149	220.127	53050.5	32798.9	32561.4	2230.56	Col-0	6.20972	497.564	504.999	58.4081
p35S-UBP12_3-2-4_WT_R1_11.jpg	Col-0	36751	3372.7	8.12347			R3-35S-UBP12-homo-3.jpg	35S::UBP12_3.2	6.08563			R3	Col-0	L3	214	1934580	177540	40.648			40648000	41	9387.01	230.934	23.6994	82	132	228.952	48995.6	30221.6				6.33995	566.769
p35S-UBP12_3-2-4_WT_R1_11.jpg	Col-0	49032	4499.75	8.41178			R3-35S-UBP12-homo-4.jpg	35S::UBP12_3.2	6.13236			R1	35S::UBP12_3.1	L3	253	1571790	144246	25.476			25476000	49	8654.14	339.698	24.0196	98	155	176.615	44683.6	27375.3				5.87729	356.84
p35S-UBP12_3-2-4_WT_R1_11.jpg	Col-0	6634.5	608.86	6.41159			R3-35S-UBP12-homo-8.jpg	35S::UBP12_3.2	5.98978			R1	35S::UBP12_3.1	L3	248	1545680	141850	28.552	27.9283	2.20759	28552000	46	9259.04	324.287	22.7723	92	156	201.283	49918.3	31400.2	29874.3	2181.72	35S::UBP12_3.1	5.77645	322.612	337.353	17.6007
p35S-UBP12_3-2-4_WT_R1_11.jpg	Col-0	11046	1013.71	6.92137			R1-35S-UBP12-homo-5.jpg	35S::UBP12_3.1	5.87729			R1	35S::UBP12_3.1	L3	252	1702860	156274	29.757			29757000	45	8568.68	287.955	21.7391	90	162	190.415	47984.6	30847.2				5.80696	332.608
p35S-UBP12_3-2-4_WT_R1_11.jpg	Col-0	60343.5	5537.83	8.61936			R1-35S-UBP12-homo-7.jpg	35S::UBP12_3.1	5.77645			R2	35S::UBP12_3.1	L3	270	1990590	182680	32.331			3.2331e+07	46	8141.16	251.807	20.5357	92	178	176.982	47785.1	31502.7				5.9765	394.058
p35S-UBP12_3-2-4_WT_R1_11.jpg	Col-0	17692.5	1623.67	7.39245			R1-35S-UBP12-homo-9.jpg	35S::UBP12_3.1	5.80696			R2	35S::UBP12_3.1	L3	276	2201610	202046	33.039	32.4997	0.477872	33039000	46	7522.04	227.671	20	92	184	163.523	45132.2	30088.1	28575.2	3909.99	35S::UBP12_3.1	5.76835	320.008	418.03	111.95
p35S-UBP12_3-2-4_WT_R1_11.jpg	Col-0	39812.5	3653.66	8.20349			R1-35S-UBP12-WT-12.jpg	Col-0	6.65694			R2	35S::UBP12_3.1	L3	214	2030820	186372	32.129			3.2129e+07	37	6378.5	198.528	20.904	74	140	172.392	36891.9	24134.9				6.29161	540.024
p35S-UBP12_3-2-4_WT_R1_11.jpg	Col-0	369.5	33.9097	3.5237			R1-35S-UBP12-WT-2.jpg	Col-0	6.82639			R3	35S::UBP12_3.1	L3	267	1987200	182369	30.293			30293000	44	7308.77	241.269	19.7309	88	179	166.108	44351	29733.4				5.96496	389.539
p35S-UBP12_3-2-4_WT_R1_11.jpg	Col-0	65912	6048.86	8.70762			R1-35S-UBP12-WT-3.jpg	Col-0	6.36348			R3	35S::UBP12_3.1	L3	347	2254400	206890	28.157	28.3497	1.85452	28157000	55	7485.3	265.841	18.8356	110	237	136.096	47225.4	32254.8	30812.9	1299.2	35S::UBP12_3.1	5.91316	369.873	375.532	12.205
p35S-UBP12_3-2-4_WT_R1_11.jpg	Col-0	253	23.2182	3.14494			R2-35S-UBP12-homo-1.jpg	35S::UBP12_3.1	5.9765			R3	35S::UBP12_3.1	L3	321	1989340	182565	26.599			26599000	56	8158.97	306.74	21.1321	112	209	145.696	46768.4	30450.4				5.90586	367.183
p35S-UBP12_3-2-4_WT_R1_11.jpg	Col-0	162	14.867	2.69915			R2-35S-UBP12-homo-11.jpg	35S::UBP12_3.1	5.76835			R1	35S::UBP12_3.2	L3	160	1832540	168175	28.071			2.8071e+07	32	5341.28	190.278	25	64	96	166.915	26706.4	16023.8				6.58372	723.225
p35S-UBP12_3-2-4_WT_R1_11.jpg	Col-0	2193	201.255	5.30457			R2-35S-UBP12-homo-2.jpg	35S::UBP12_3.1	6.29161			R1	35S::UBP12_3.2	L3	203	1403000	128756	25.935	27.718	1.02083	25935000	40	8057.12	310.666	24.5399	80	123	201.428	40889.9	24775.6	22651.9	4341.39	35S::UBP12_3.2	5.96049	387.799	516.28	132.578
p35S-UBP12_3-2-4_WT_R1_11.jpg	Col-0	14989.5	1375.61	7.22665			R2-35S-UBP12-WT-1.jpg	Col-0	6.46451			R1	35S::UBP12_3.2	L3	170	1576430	144672	27.847			2.7847e+07	31	5967.01	214.278	22.3022	62	108	192.484	32722.3	20788.3				6.33231	562.457
p35S-UBP12_3-2-4_WT_R1_11.jpg	Col-0	5922.5	543.518	6.29806			R2-35S-UBP12-WT-10.jpg	Col-0	6.29022			R1	35S::UBP12_3.2	L3	185	1420130	130328	28.339			28339000	36	7827.98	276.227	24.1611	72	113	217.444	40227.1	24571.2				6.1678	477.136
p35S-UBP12_3-2-4_WT_R1_11.jpg	Col-0	7076	649.377	6.47601			R2-35S-UBP12-WT-3.jpg	Col-0	6.42326			R1	35S::UBP12_3.2	L3	187	1313090	120505	28.398			28398000	36	8483.73	298.744	23.8411	72	115	235.659	44068.3	27100.8				6.06561	430.784
p35S-UBP12_3-2-4_WT_R1_11.jpg	Col-0	1099	100.857	4.61371			R3-35S-UBP12-homo-2.jpg	35S::UBP12_3.1	5.96496			R2	35S::UBP12_3.2	L3	179	1418090	130141	30.661			3.0661e+07	30	7067.97	230.52	20.1342	60	119	235.599	42172.2	28036.3				6.0821	437.948
p35S-UBP12_3-2-4_WT_R1_11.jpg	Col-0	2670	245.031	5.50138			R3-35S-UBP12-homo-5.jpg	35S::UBP12_3.1	5.91316			R2	35S::UBP12_3.2	L3	229	1740720	159749	30.263	30.5803	0.285673	30263000	46	8714.29	287.952	25.1366	92	137	189.441	43382	25953.4	28485.7	2784.31	35S::UBP12_3.2	6.09498	443.627	433.019	13.752
p35S-UBP12_3-2-4_WT_R1_11.jpg	Col-0	2610	239.524	5.47865			R3-35S-UBP12-homo-7.jpg	35S::UBP12_3.1	5.90586			R2	35S::UBP12_3.2	L3	216	1536680	141024	30.817			3.0817e+07	36	7866.84	255.276	20	72	144	218.523	47201.1	31467.4				6.03424	417.481
p35S-UBP12_3-2-4_WT_R1_11.jpg	Col-0	3977	364.976	5.89983			R3-35S-UBP12-WT-3.jpg	Col-0	6.49599			R3	35S::UBP12_3.2	L3	202	1550560	142298	27.375			2.7375e+07	36	6925.63	252.991	21.6867	72	130	192.379	38860.5	25009.2				6.08563	439.495
p35S-UBP12_3-2-4_WT_R1_11.jpg	Col-0	9206	844.851	6.73916			R3-35S-UBP12-WT-8.jpg	Col-0	6.51302			R3	35S::UBP12_3.2	L3	216	1761180	161627	27.055	26.776	0.777022	27055000	37	6193.51	228.923	20.6704	74	142	167.392	36156.7	23769.7	24672.2	789.957	35S::UBP12_3.2	6.13236	460.52	433.114	31.0916
p35S-UBP12_3-2-4_WT_R1_11.jpg	Col-0	12262.5	1125.35	7.02585			R3-35S-UBP12-WT-9.jpg	Col-0	6.49899			R3	35S::UBP12_3.2	L3	233	1777880	163159	25.898			25898000	37	5872.95	226.772	18.8776	74	159	158.728	36983.7	25237.8				5.98978	399.327
p35S-UBP12_3-2-4_WT_R1_11.jpg	Col-0	23453	2152.32	7.6743			p35S-UBP13_1-1-2_R1_1.jpg	35S::UBP13_1.1	6.14352			R1	35S::UBP13_1.1	L3	162	1230040	112883	27.988			27988000	32	7934.03	283.48	24.6154	64	98	247.938	40166	24298				6.14352	465.692
p35S-UBP12_3-2-4_WT_R1_11.jpg	Col-0	5387	494.374	6.20329			p35S-UBP13_1-1-2_R1_2.jpg	35S::UBP13_1.1	6.14805			R1	35S::UBP13_1.1	L3	180	1286960	118107	20.742	27.9993	5.61781	20742000	36	6322.36	304.81	25	72	108	175.621	31611.8	18967.1	24169.9	5130.15	35S::UBP13_1.1	6.14805	467.803	486.701	100.334
p35S-UBP12_3-2-4_WT_R1_11.jpg	Col-0	19349.5	1775.74	7.48197			p35S-UBP13_1-1-2_R1_3.jpg	35S::UBP13_1.1	5.95858			R1	35S::UBP13_1.1	L3	165	1193260	109508	34.426			34426000	33	10374.2	301.349	25	66	99	314.371	51871.2	31122.7				5.95858	387.06
p35S-UBP12_3-2-4_WT_R1_11.jpg	Col-0	2867	263.11	5.57257			p35S-UBP13_1-1-2_R1_4.jpg	35S::UBP13_1.1	6.43975			R1	35S::UBP13_1.1	L3	172	1409800	129380	28.841			28841000	36	8025.02	278.251	26.4706	72	100	222.917	38341.8	22291.7				6.43975	626.249
p35S-UBP12_3-2-4_WT_R1_11.jpg	Col-0	48862	4484.15	8.4083			p35S-UBP13_1-1-2_R2_3.jpg	35S::UBP13_1.1	6.5229			R2	35S::UBP13_1.1	L3	163	1637220	150251	27.882			27882000	35	6494.95	232.944	27.3438	70	93	185.57	30247.9	17258				6.5229	680.549
p35S-UBP12_3-2-4_WT_R1_11.jpg	Col-0	8137	746.747	6.61573			p35S-UBP13_1-1-2_R2_6.jpg	35S::UBP13_1.1	5.95121			R2	35S::UBP13_1.1	L3	202	1474620	135328	27.152	27.1513	0.731	27152000	37	7423.6	273.409	22.4242	74	128	200.638	40528.8	25681.6	23832.7	5872.68	35S::UBP13_1.1	5.95121	384.219	466.408	187.112
p35S-UBP12_3-2-4_WT_R1_11.jpg	Col-0	2388	219.151	5.38976			p35S-UBP13_1-1-2_R2_7.jpg	35S::UBP13_1.1	5.81251			R2	35S::UBP13_1.1	L3	202	1290330	118416	26.42			26420000	37	8255.15	312.458	22.4242	74	128	223.112	45068.6	28558.3				5.81251	334.458
p35S-UBP12_3-2-4_WT_R1_11.jpg	Col-0	6829.5	626.755	6.44056			p35S-UBP13_1-1-2_R3_2.jpg	35S::UBP13_1.1	6.04355			R3	35S::UBP13_1.1	L3	191	1506670	138270	21.347			21347000	31	4785.99	224.199	19.375	62	129	154.387	29487.9	19915.9				6.04355	421.386
p35S-UBP12_3-2-4_WT_R1_11.jpg	Col-0	5000	458.859	6.12874			p35S-UBP13_1-1-2_R3_4.jpg	35S::UBP13_1.1	5.96185			R3	35S::UBP13_1.1	L3	174	1380970	126734	24.108	23.1293	1.54602	24108000	32	6087.21	252.497	22.5352	64	110	190.225	33099.2	20924.8	22304.9	3302.91	35S::UBP13_1.1	5.96185	388.326	397.514	20.856
p35S-UBP12_3-2-4_WT_R1_11.jpg	Col-0	7246	664.978	6.49975			p35S-UBP13_1-1-2_R3_7.jpg	35S::UBP13_1.1	5.94759			R3	35S::UBP13_1.1	L3	253	1570290	144108	23.933			23933000	48	7971.67	333.083	23.4146	96	157	166.077	42017.4	26074				5.94759	382.829
p35S-UBP12_3-2-4_WT_R1_11.jpg	Col-0	20317.5	1864.57	7.53079			p35S-UBP13_2-3-7_R1_1.jpg	35S::UBP13_2.3	5.99657			R1	35S::UBP13_2.3	L3	242	1542780	141584	22.61			22610000	49	7824.99	346.085	25.3886	98	144	159.694	38645.9	22995.9				5.99657	402.049
p35S-UBP12_3-2-4_WT_R1_11.jpg	Col-0	28989.5	2660.42	7.88624			p35S-UBP13_2-3-7_R1_3.jpg	35S::UBP13_2.3	5.96371			R1	35S::UBP13_2.3	L3	253	1527310	140164	25.07	23.5867	1.30592	25070000	47	8406.52	335.322	22.8155	94	159	178.862	45252.1	28439.1	26815.7	3320.47	35S::UBP13_2.3	5.96371	389.051	349.128	80.6676
p35S-UBP12_3-2-4_WT_R1_11.jpg	Col-0	5434	498.688	6.21198			p35S-UBP13_2-3-7_R1_4.jpg	35S::UBP13_2.3	5.54629			R1	35S::UBP13_2.3	L3	236	1300280	119329	23.08			23080000	43	8316.84	360.348	22.2798	86	150	193.415	45645.9	29012.2				5.54629	256.284
p35S-UBP12_3-2-4_WT_R1_11.jpg	Col-0	21313	1955.93	7.57862			p35S-UBP13_2-3-7_R2_1.jpg	35S::UBP13_2.3	6.11863			R2	35S::UBP13_2.3	L3	168	1415910	129941	26.404			26404000	31	6299.22	238.571	22.6277	62	106	203.201	34137.7	21539.3				6.11863	454.243
p35S-UBP12_3-2-4_WT_R1_11.jpg	Col-0	33020.5	3030.35	8.01643			p35S-UBP13_2-3-7_R2_4.jpg	35S::UBP13_2.3	5.63091			R2	35S::UBP13_2.3	L3	254	1435120	131703	26.672	25.6703	1.5088	26672000	41	8303.14	311.305	19.2488	82	172	202.516	51439	34832.7	29654.5	7116.77	35S::UBP13_2.3	5.63091	278.916	333.386	104.835
p35S-UBP12_3-2-4_WT_R1_11.jpg	Col-0	25682	2356.88	7.76509			p35S-UBP13_2-3-7_R2_5.jpg	35S::UBP13_2.3	5.58724			R2	35S::UBP13_2.3	L3	231	1176350	107956	23.935			23935000	42	9311.88	389.049	22.2222	84	147	221.711	51215.3	32591.6				5.58724	266.999
p35S-UBP12_3-2-4_WT_R1_11.jpg	Col-0	13296.5	1220.24	7.10681			p35S-UBP13_2-3-7_R3_2.jpg	35S::UBP13_2.3	6.05403			R3	35S::UBP13_2.3	L3	185	1326360	121722	28.235			28235000	35	8118.68	287.54	23.3333	70	115	231.962	42913	26675.7				6.05403	425.827
p35S-UBP12_3-2-4_WT_R1_11.jpg	Col-0	5375	493.273	6.20106			p35S-UBP13_2-3-7_R3_4.jpg	35S::UBP13_2.3	5.91779			R3	35S::UBP13_2.3	L3	159	1266940	116269	26.797	27.0867	1.03438	26797000	28	6453.26	240.82	21.374	56	103	230.474	36645.3	23738.8	31098.2	10308.7	35S::UBP13_2.3	5.91779	371.59	342.883	100.423
p35S-UBP12_3-2-4_WT_R1_11.jpg	Col-0	17482	1604.35	7.38048			p35S-UBP13_2-3-7_R3_7.jpg	35S::UBP13_2.3	5.44343			R3	35S::UBP13_2.3	L3	285	1446300	132729	26.228			26228000	34	6718.57	256.16	13.5458	68	217	197.605	56317.4	42880.3				5.44343	231.233
p35S-UBP12_3-2-4_WT_R1_11.jpg	Col-0	3581.5	328.68	5.79509
p35S-UBP12_3-2-4_WT_R1_11.jpg	Col-0	24726	2269.15	7.72716
p35S-UBP12_3-2-4_WT_R1_11.jpg	Col-0	2031.5	186.434	5.22808
p35S-UBP12_3-2-4_WT_R1_11.jpg	Col-0	241	22.117	3.09635								Statistical analysis (ANOVA, Dunnett's test)
p35S-UBP12_3-2-4_WT_R1_11.jpg	Col-0	202	18.5379	2.91982
p35S-UBP12_3-2-4_WT_R1_11.jpg	Col-0	43126.5	3957.79	8.28344								Leaf area 35S::UBP12/13				Cell number 35S::UBP12/13				Cell area 35S::UBP12/13
p35S-UBP12_3-2-4_WT_R1_11.jpg	Col-0	3008	276.049	5.62058
p35S-UBP12_3-2-4_WT_R1_11.jpg	Col-0	840.5	77.1341	4.34555								Line	Repeat	Leaf Area		Line	Repeat	Cell number		Line	Repeat	Cell Area
p35S-UBP12_3-2-4_WT_R1_11.jpg	Col-0	1622.5	148.9	5.00327								Col-0	1	37.519		Col-0	1	21100		Col-0	1	778.165
p35S-UBP12_3-2-4_WT_R1_11.jpg	Col-0	5410	496.485	6.20755								Col-0	1	39.39		Col-0	1	21400		Col-0	1	921.856
p35S-UBP12_3-2-4_WT_R1_11.jpg	Col-0	28457	2611.55	7.8677								Col-0	1	39.791		Col-0	1	22900		Col-0	1	580.264
p35S-UBP12_3-2-4_WT_R1_11.jpg	Col-0	10959.5	1005.77	6.91351								Col-0	1	43.48		Col-0	1	25000		Col-0	1	654.81
p35S-UBP12_3-2-4_WT_R1_11.jpg	Col-0	10392.5	953.738	6.86039								Col-0	1	43.035		Col-0	1	30300		Col-0	1	712.275
p35S-UBP12_3-2-4_WT_R1_11.jpg	Col-0	29242	2683.59	7.89491								Col-0	1	42.997		Col-0	1	23000		Col-0	1	946.079
p35S-UBP12_3-2-4_WT_R1_11.jpg	Col-0	5989	549.621	6.30923								Col-0	2	38.425		Col-0	2	26200		Col-0	2	641.951
p35S-UBP12_3-2-4_WT_R1_11.jpg	Col-0	1910	175.284	5.16641								Col-0	2	36.525		Col-0	2	27600		Col-0	2	539.27
p35S-UBP12_3-2-4_WT_R1_11.jpg	Col-0	4846.5	444.772	6.09756								Col-0	2	37.547		Col-0	2	27800		Col-0	2	616.008
p35S-UBP12_3-2-4_WT_R1_11.jpg	Col-0	19005.5	1744.17	7.46403								Col-0	2	38.102		Col-0	2	31200		Col-0	2	462.754
p35S-UBP12_3-2-4_WT_R1_11.jpg	Col-0	4511.5	414.028	6.02593								Col-0	2	40.423		Col-0	2	33600		Col-0	2	482.971
p35S-UBP12_3-2-4_WT_R1_11.jpg	Col-0	9046.5	830.213	6.72168								Col-0	2	39.214		Col-0	2	31500		Col-0	2	534.973
p35S-UBP12_3-2-4_WT_R1_11.jpg	Col-0	2731.5	250.674	5.52416								Col-0	3	39.05		Col-0	3	25900		Col-0	3	662.482
p35S-UBP12_3-2-4_WT_R1_11.jpg	Col-0	15611	1432.65	7.26728								Col-0	3	39.274		Col-0	3	27700		Col-0	3	673.859
p35S-UBP12_3-2-4_WT_R1_11.jpg	Col-0	22147.5	2032.51	7.61703								Col-0	3	40.904		Col-0	3	28500		Col-0	3	664.468
p35S-UBP12_3-2-4_WT_R1_11.jpg	Col-0	23081	2118.18	7.65831								Col-0	3	41.749		Col-0	3	34700		Col-0	3	450.664
p35S-UBP12_3-2-4_WT_R1_11.jpg	Col-0	33275	3053.7	8.02411								Col-0	3	37.032		Col-0	3	32800		Col-0	3	497.564
p35S-UBP12_3-2-4_WT_R1_11.jpg	Col-0	7806.5	716.416	6.57426								Col-0	3	40.648		Col-0	3	30200		Col-0	3	566.769
p35S-UBP12_3-2-4_WT_R1_11.jpg	Col-0	53951.5	4951.22	8.50739								35S-UBP12_3.1	1	28.071		35S-UBP12_3.2	1	16000		35S-UBP12_3.2	1	723.225
p35S-UBP12_3-2-4_WT_R1_11.jpg	Col-0	2156	197.86	5.28756								35S-UBP12_3.1	1	25.935		35S-UBP12_3.2	1	24800		35S-UBP12_3.2	1	387.799
p35S-UBP12_3-2-4_WT_R1_11.jpg	Col-0	875	80.3003	4.38577								35S-UBP12_3.1	1	27.847		35S-UBP12_3.2	1	20800		35S-UBP12_3.2	1	562.457
p35S-UBP12_3-2-4_WT_R1_11.jpg	Col-0	2398.5	220.115	5.39415								35S-UBP12_3.1	1	28.339		35S-UBP12_3.2	1	24600		35S-UBP12_3.2	1	477.136
p35S-UBP12_3-2-4_WT_R1_11.jpg	Col-0	4270	391.865	5.97092								35S-UBP12_3.1	1	28.398		35S-UBP12_3.2	1	27100		35S-UBP12_3.2	1	430.784
p35S-UBP12_3-2-4_WT_R1_11.jpg	Col-0	26962	2474.35	7.81373								35S-UBP12_3.1	2	30.661		35S-UBP12_3.2	2	28000		35S-UBP12_3.2	2	437.948
p35S-UBP12_3-2-4_WT_R1_11.jpg	Col-0	37143	3408.68	8.13408								35S-UBP12_3.1	2	30.263		35S-UBP12_3.2	2	26000		35S-UBP12_3.2	2	443.627
p35S-UBP12_3-2-4_WT_R1_11.jpg	Col-0	21923	2011.91	7.60684								35S-UBP12_3.1	2	30.817		35S-UBP12_3.2	2	31500		35S-UBP12_3.2	2	417.481
p35S-UBP12_3-2-4_WT_R1_11.jpg	Col-0	13761.5	1262.92	7.14118								35S-UBP12_3.1	3	27.375		35S-UBP12_3.2	3	25000		35S-UBP12_3.2	3	439.495
p35S-UBP12_3-2-4_WT_R1_11.jpg	Col-0	7763	712.424	6.56867								35S-UBP12_3.1	3	27.055		35S-UBP12_3.2	3	23800		35S-UBP12_3.2	3	460.52
p35S-UBP12_3-2-4_WT_R1_3.jpg	Col-0	3759	344.97	5.84346								35S-UBP12_3.1	3	25.898		35S-UBP12_3.2	3	25200		35S-UBP12_3.2	3	399.327
p35S-UBP12_3-2-4_WT_R1_3.jpg	Col-0	1355	124.351	4.82311								35S-UBP12_3.2	1	25.476		35S-UBP12_3.1	1	27400		35S-UBP12_3.1	1	356.84
p35S-UBP12_3-2-4_WT_R1_3.jpg	Col-0	862.5	79.1531	4.37138								35S-UBP12_3.2	1	28.552		35S-UBP12_3.1	1	31400		35S-UBP12_3.1	1	322.612
p35S-UBP12_3-2-4_WT_R1_3.jpg	Col-0	2353	215.939	5.375								35S-UBP12_3.2	1	29.757		35S-UBP12_3.1	1	30800		35S-UBP12_3.1	1	332.608
p35S-UBP12_3-2-4_WT_R1_3.jpg	Col-0	9226.5	846.732	6.74138								35S-UBP12_3.2	2	32.331		35S-UBP12_3.1	2	31500		35S-UBP12_3.1	2	394.058
p35S-UBP12_3-2-4_WT_R1_3.jpg	Col-0	6999	642.31	6.46507								35S-UBP12_3.2	2	33.039		35S-UBP12_3.1	2	30100		35S-UBP12_3.1	2	320.008
p35S-UBP12_3-2-4_WT_R1_3.jpg	Col-0	26074	2392.86	7.78024								35S-UBP12_3.2	2	32.129		35S-UBP12_3.1	2	24100		35S-UBP12_3.1	2	540.024
p35S-UBP12_3-2-4_WT_R1_3.jpg	Col-0	2057	188.774	5.24055								35S-UBP12_3.2	3	30.293		35S-UBP12_3.1	3	29700		35S-UBP12_3.1	3	389.539
p35S-UBP12_3-2-4_WT_R1_3.jpg	Col-0	2821	258.888	5.5564								35S-UBP12_3.2	3	28.157		35S-UBP12_3.1	3	32300		35S-UBP12_3.1	3	369.873
p35S-UBP12_3-2-4_WT_R1_3.jpg	Col-0	6018.5	552.328	6.31414								35S-UBP12_3.2	3	26.599		35S-UBP12_3.1	3	30500		35S-UBP12_3.1	3	367.183
p35S-UBP12_3-2-4_WT_R1_3.jpg	Col-0	10891	999.486	6.90724								35S-UBP13_1.1	1	27.988		35S-UBP13_1.1	1	24300		35S-UBP13_1.1	1	465.692
p35S-UBP12_3-2-4_WT_R1_3.jpg	Col-0	684.5	62.8178	4.14024								35S-UBP13_1.1	1	20.742		35S-UBP13_1.1	1	19000		35S-UBP13_1.1	1	467.803
p35S-UBP12_3-2-4_WT_R1_3.jpg	Col-0	1565.5	143.669	4.96751								35S-UBP13_1.1	1	34.426		35S-UBP13_1.1	1	31100		35S-UBP13_1.1	1	387.06
p35S-UBP12_3-2-4_WT_R1_3.jpg	Col-0	15952	1463.94	7.28889								35S-UBP13_1.1	1	28.841		35S-UBP13_1.1	1	22300		35S-UBP13_1.1	1	626.25
p35S-UBP12_3-2-4_WT_R1_3.jpg	Col-0	6093	559.165	6.32644								35S-UBP13_1.1	2	27.882		35S-UBP13_1.1	2	17300		35S-UBP13_1.1	2	680.549
p35S-UBP12_3-2-4_WT_R1_3.jpg	Col-0	13821.5	1268.42	7.14553								35S-UBP13_1.1	2	27.152		35S-UBP13_1.1	2	25700		35S-UBP13_1.1	2	384.219
p35S-UBP12_3-2-4_WT_R1_3.jpg	Col-0	57683	5293.67	8.57427								35S-UBP13_1.1	2	26.42		35S-UBP13_1.1	2	28600		35S-UBP13_1.1	2	334.458
p35S-UBP12_3-2-4_WT_R1_3.jpg	Col-0	1649	151.332	5.01947								35S-UBP13_1.1	3	21.347		35S-UBP13_1.1	3	19900		35S-UBP13_1.1	3	421.386
p35S-UBP12_3-2-4_WT_R1_3.jpg	Col-0	1685	154.635	5.04107								35S-UBP13_1.1	3	24.108		35S-UBP13_1.1	3	20900		35S-UBP13_1.1	3	388.326
p35S-UBP12_3-2-4_WT_R1_3.jpg	Col-0	23047	2115.06	7.65684								35S-UBP13_1.1	3	23.933		35S-UBP13_1.1	3	26100		35S-UBP13_1.1	3	382.829
p35S-UBP12_3-2-4_WT_R1_3.jpg	Col-0	8461.5	776.527	6.65483								35S-UBP13_2.3	1	22.61		35S-UBP13_2.3	1	23000		35S-UBP13_2.3	1	402.049
p35S-UBP12_3-2-4_WT_R1_3.jpg	Col-0	15337.5	1407.55	7.24961								35S-UBP13_2.3	1	25.07		35S-UBP13_2.3	1	28400		35S-UBP13_2.3	1	389.051
p35S-UBP12_3-2-4_WT_R1_3.jpg	Col-0	4437.5	407.237	6.0094								35S-UBP13_2.3	1	23.08		35S-UBP13_2.3	1	29000		35S-UBP13_2.3	1	256.284
p35S-UBP12_3-2-4_WT_R1_3.jpg	Col-0	10258.5	941.44	6.84741								35S-UBP13_2.3	2	26.404		35S-UBP13_2.3	2	21500		35S-UBP13_2.3	2	454.243
p35S-UBP12_3-2-4_WT_R1_3.jpg	Col-0	1450.5	133.115	4.89121								35S-UBP13_2.3	2	26.672		35S-UBP13_2.3	2	34800		35S-UBP13_2.3	2	278.916
p35S-UBP12_3-2-4_WT_R1_3.jpg	Col-0	3263.5	299.497	5.7021								35S-UBP13_2.3	2	23.935		35S-UBP13_2.3	2	32600		35S-UBP13_2.3	2	266.998
p35S-UBP12_3-2-4_WT_R1_3.jpg	Col-0	2485.5	228.099	5.42978								35S-UBP13_2.3	3	28.235		35S-UBP13_2.3	3	26700		35S-UBP13_2.3	3	425.827
p35S-UBP12_3-2-4_WT_R1_3.jpg	Col-0	30496	2798.67	7.9369								35S-UBP13_2.3	3	26.797		35S-UBP13_2.3	3	23700		35S-UBP13_2.3	3	371.59
p35S-UBP12_3-2-4_WT_R1_3.jpg	Col-0	8846	811.813	6.69927								35S-UBP13_2.3	3	26.228		35S-UBP13_2.3	3	42900		35S-UBP13_2.3	3	231.233
p35S-UBP12_3-2-4_WT_R1_3.jpg	Col-0	11383	1044.64	6.95143
p35S-UBP12_3-2-4_WT_R1_3.jpg	Col-0	9896	908.173	6.81144								ANOVA, Dunnett's test				ANOVA, Dunnett's test				ANOVA, Dunnett's test
p35S-UBP12_3-2-4_WT_R1_3.jpg	Col-0	31506	2891.36	7.96948
p35S-UBP12_3-2-4_WT_R1_3.jpg	Col-0	2345	215.205	5.37159								Comparison	p adj			Comparison	p adj			Comparison	p adj
p35S-UBP12_3-2-4_WT_R1_3.jpg	Col-0	2964	272.011	5.60584								35S-UBP12_3.2-35S-UBP12_3.1	0.6158714			35S-UBP12_3.2-35S-UBP12_3.1	0.1025081			35S-UBP12_3.2-35S-UBP12_3.1	0.2571836
p35S-UBP12_3-2-4_WT_R1_3.jpg	Col-0	8586.5	787.998	6.6695								35S-UBP13_1.1-35S-UBP12_3.1	0.0118586			35S-UBP13_1.1-35S-UBP12_3.1	0.0257952			35S-UBP13_1.1-35S-UBP12_3.1	0.4760857
p35S-UBP12_3-2-4_WT_R1_3.jpg	Col-0	25056.5	2299.48	7.74044								35S-UBP13_2.3-35S-UBP12_3.1	0.0013529			35S-UBP13_2.3-35S-UBP12_3.1	0.9985669			35S-UBP13_2.3-35S-UBP12_3.1	0.9470515
p35S-UBP12_3-2-4_WT_R1_3.jpg	Col-0	13412.5	1230.89	7.11549								Col-0-35S-UBP12_3.1	0.0000000			Col-0-35S-UBP12_3.1	0.8210936			Col-0-35S-UBP12_3.1	0.0000022
p35S-UBP12_3-2-4_WT_R1_3.jpg	Col-0	875	80.3003	4.38577								35S-UBP13_1.1-35S-UBP12_3.2	0.2294581			35S-UBP13_1.1-35S-UBP12_3.2	0.9611549			35S-UBP13_1.1-35S-UBP12_3.2	0.9952110
p35S-UBP12_3-2-4_WT_R1_3.jpg	Col-0	6153	564.671	6.33624								35S-UBP13_2.3-35S-UBP12_3.2	0.0396671			35S-UBP13_2.3-35S-UBP12_3.2	0.1860960			35S-UBP13_2.3-35S-UBP12_3.2	0.0525255
p35S-UBP12_3-2-4_WT_R1_3.jpg	Col-0	1950	178.955	5.18713								Col-0-35S-UBP12_3.2	0.0000000			Col-0-35S-UBP12_3.2	0.3681835			Col-0-35S-UBP12_3.2	0.0013693
p35S-UBP12_3-2-4_WT_R1_3.jpg	Col-0	32347	2968.54	7.99583								35S-UBP13_2.3-35S-UBP13_1.1	0.9089554			35S-UBP13_2.3-35S-UBP13_1.1	0.0525394			35S-UBP13_2.3-35S-UBP13_1.1	0.1347013
p35S-UBP12_3-2-4_WT_R1_3.jpg	Col-0	3364.5	308.766	5.73258								Col-0-35S-UBP13_1.1	0.0000000			Col-0-35S-UBP13_1.1	0.1041742			Col-0-35S-UBP13_1.1	0.0005435
p35S-UBP12_3-2-4_WT_R1_3.jpg	Col-0	4457.5	409.073	6.01389								Col-0-35S-UBP13_2.3	0.0000000			Col-0-35S-UBP13_2.3	0.9447310			Col-0-35S-UBP13_2.3	0.0000001
p35S-UBP12_3-2-4_WT_R1_3.jpg	Col-0	25274.5	2319.48	7.7491
p35S-UBP12_3-2-4_WT_R1_3.jpg	Col-0	3984	365.619	5.90159
p35S-UBP12_3-2-4_WT_R1_3.jpg	Col-0	1209	110.952	4.7091
p35S-UBP12_3-2-4_WT_R1_3.jpg	Col-0	4144.5	380.348	5.94109
p35S-UBP12_3-2-4_WT_R1_3.jpg	Col-0	1906.5	174.963	5.16457
p35S-UBP12_3-2-4_WT_R1_3.jpg	Col-0	10569.5	969.981	6.87728
p35S-UBP12_3-2-4_WT_R1_3.jpg	Col-0	37484.5	3440.02	8.14323
p35S-UBP12_3-2-4_WT_R1_3.jpg	Col-0	6544	600.554	6.39785
p35S-UBP12_3-2-4_WT_R1_3.jpg	Col-0	45557.5	4180.89	8.33828
p35S-UBP12_3-2-4_WT_R1_3.jpg	Col-0	39716	3644.81	8.20106
p35S-UBP12_3-2-4_WT_R1_3.jpg	Col-0	2366.5	217.178	5.38072
p35S-UBP12_3-2-4_WT_R1_3.jpg	Col-0	8561	785.658	6.66652
p35S-UBP12_3-2-4_WT_R1_3.jpg	Col-0	4437	407.191	6.00928
p35S-UBP12_3-2-4_WT_R1_3.jpg	Col-0	6178	566.966	6.3403
p35S-UBP12_3-2-4_WT_R1_3.jpg	Col-0	13099	1202.12	7.09184
p35S-UBP12_3-2-4_WT_R1_3.jpg	Col-0	10660	978.287	6.8858
p35S-UBP12_3-2-4_WT_R1_3.jpg	Col-0	20523	1883.43	7.54085
p35S-UBP12_3-2-4_WT_R1_3.jpg	Col-0	8761	804.012	6.68961
p35S-UBP12_3-2-4_WT_R1_3.jpg	Col-0	31085	2852.72	7.95603
p35S-UBP12_3-2-4_WT_R1_3.jpg	Col-0	8271	759.044	6.63206
p35S-UBP12_3-2-4_WT_R1_3.jpg	Col-0	8925	819.063	6.70816
p35S-UBP12_3-2-4_WT_R1_3.jpg	Col-0	21069.5	1933.58	7.56713
p35S-UBP12_3-2-4_WT_R1_3.jpg	Col-0	11174	1025.46	6.93289
p35S-UBP12_3-2-4_WT_R1_3.jpg	Col-0	2303	211.35	5.35352
p35S-UBP12_3-2-4_WT_R1_3.jpg	Col-0	6418.5	589.037	6.37849
p35S-UBP12_3-2-4_WT_R1_3.jpg	Col-0	43741	4014.19	8.29759
p35S-UBP12_3-2-4_WT_R1_3.jpg	Col-0	6161.5	565.452	6.33762
p35S-UBP12_3-2-4_WT_R1_3.jpg	Col-0	28428.5	2608.93	7.8667
p35S-UBP12_3-2-4_WT_R1_3.jpg	Col-0	1928.5	176.982	5.17605
p35S-UBP12_3-2-4_WT_R1_3.jpg	Col-0	5383	494.007	6.20255
p35S-UBP12_3-2-4_WT_R1_3.jpg	Col-0	14205	1303.62	7.1729
p35S-UBP12_3-2-4_WT_R1_3.jpg	Col-0	11065	1015.45	6.92309
p35S-UBP12_3-2-4_WT_R1_3.jpg	Col-0	18090.5	1660.2	7.41469
p35S-UBP12_3-2-4_WT_R1_3.jpg	Col-0	39326.5	3609.06	8.1912
p35S-UBP12_3-2-4_WT_R1_3.jpg	Col-0	20694.5	1899.17	7.54917
p35S-UBP12_3-2-4_WT_R1_3.jpg	Col-0	18939.5	1738.11	7.46055
p35S-UBP12_3-2-4_WT_R1_3.jpg	Col-0	21676.5	1989.29	7.59553
p35S-UBP12_3-2-4_WT_R1_3.jpg	Col-0	2162.5	198.456	5.29057
p35S-UBP12_3-2-4_WT_R1_3.jpg	Col-0	4230.5	388.24	5.96162
p35S-UBP12_3-2-4_WT_R1_3.jpg	Col-0	4702.5	431.557	6.0674
p35S-UBP12_3-2-4_WT_R1_3.jpg	Col-0	5421.5	497.54	6.20968
p35S-UBP12_3-2-4_WT_R1_3.jpg	Col-0	10494	963.053	6.87011
p35S-UBP12_3-2-4_WT_R1_3.jpg	Col-0	10254	941.027	6.84697
p35S-UBP12_3-2-4_WT_R1_3.jpg	Col-0	1543.5	141.65	4.95336
p35S-UBP12_3-2-4_WT_R1_3.jpg	Col-0	33682	3091.06	8.03627
p35S-UBP12_3-2-4_WT_R1_3.jpg	Col-0	2137.5	196.162	5.27894
p35S-UBP12_3-2-4_WT_R1_3.jpg	Col-0	16277.5	1493.81	7.30909
p35S-UBP12_3-2-4_WT_R1_3.jpg	Col-0	5438	499.055	6.21272
p35S-UBP12_3-2-4_WT_R1_3.jpg	Col-0	3147	288.806	5.66575
p35S-UBP12_3-2-4_WT_R1_3.jpg	Col-0	13385	1228.36	7.11344
p35S-UBP12_3-2-4_WT_R1_3.jpg	Col-0	4818.5	442.202	6.09177
p35S-UBP12_3-2-4_WT_R1_3.jpg	Col-0	8878	814.749	6.70288
p35S-UBP12_3-2-4_WT_R1_3.jpg	Col-0	3203	293.945	5.68339
p35S-UBP12_3-2-4_WT_R1_3.jpg	Col-0	14300	1312.34	7.17956
p35S-UBP12_3-2-4_WT_R1_3.jpg	Col-0	2059.5	189.004	5.24177
p35S-UBP12_3-2-4_WT_R1_3.jpg	Col-0	18437	1692	7.43366
p35S-UBP12_3-2-4_WT_R1_3.jpg	Col-0	3380.5	310.234	5.73733
p35S-UBP12_3-2-4_WT_R1_3.jpg	Col-0	19244	1766.06	7.4765
p35S-UBP12_3-2-4_WT_R1_3.jpg	Col-0	3112.5	285.64	5.65473
p35S-UBP12_3-2-4_WT_R1_3.jpg	Col-0	1348.5	123.754	4.8183
p35S-UBP12_3-2-4_WT_R1_3.jpg	Col-0	8868	813.832	6.70175
p35S-UBP12_3-2-4_WT_R1_3.jpg	Col-0	8048.5	738.625	6.60479
p35S-UBP12_3-2-4_WT_R1_3.jpg	Col-0	1115.5	102.371	4.62861
p35S-UBP12_3-2-4_WT_R1_3.jpg	Col-0	9905	908.999	6.81234
p35S-UBP12_3-2-4_WT_R1_3.jpg	Col-0	23170.5	2126.4	7.66218
p35S-UBP12_3-2-4_WT_R1_3.jpg	Col-0	37351.5	3427.81	8.13968
p35S-UBP12_3-2-4_WT_R1_3.jpg	Col-0	5945	545.583	6.30185
p35S-UBP12_3-2-4_WT_R1_3.jpg	Col-0	21134	1939.5	7.57019
p35S-UBP12_3-2-4_WT_R1_3.jpg	Col-0	5657.5	519.199	6.25229
p35S-UBP12_3-2-4_WT_R1_3.jpg	Col-0	6358.5	583.531	6.3691
p35S-UBP12_3-2-4_WT_R1_3.jpg	Col-0	21706.5	1992.04	7.59692
p35S-UBP12_3-2-4_WT_R1_3.jpg	Col-0	14797.5	1357.99	7.21376
p35S-UBP12_3-2-4_WT_R1_3.jpg	Col-0	32098	2945.69	7.9881
p35S-UBP12_3-2-4_WT_R1_3.jpg	Col-0	6190.5	568.113	6.34232
p35S-UBP12_3-2-4_WT_R1_3.jpg	Col-0	65135.5	5977.6	8.69577
p35S-UBP12_3-2-4_WT_R1_3.jpg	Col-0	7638	700.953	6.55244
p35S-UBP12_3-2-4_WT_R1_3.jpg	Col-0	65131	5977.18	8.6957
p35S-UBP12_3-2-4_WT_R1_3.jpg	Col-0	11936	1095.39	6.99886
p35S-UBP12_3-2-4_WT_R1_3.jpg	Col-0	9752	894.958	6.79678
p35S-UBP12_3-2-4_WT_R1_3.jpg	Col-0	10861.5	996.779	6.90453
p35S-UBP12_3-2-4_WT_R1_3.jpg	Col-0	4158	381.587	5.94434
p35S-UBP12_3-2-4_WT_R1_3.jpg	Col-0	3294	302.296	5.71141
p35S-UBP12_3-2-4_WT_R1_3.jpg	Col-0	7560.5	693.84	6.54224
p35S-UBP12_3-2-4_WT_R1_3.jpg	Col-0	13245.5	1215.56	7.10296
p35S-UBP12_3-2-4_WT_R1_3.jpg	Col-0	35449	3253.22	8.0874
p35S-UBP12_3-2-4_WT_R1_3.jpg	Col-0	6225.5	571.325	6.34796
p35S-UBP12_3-2-4_WT_R1_3.jpg	Col-0	13926.5	1278.06	7.1531
p35S-UBP12_3-2-4_WT_R1_3.jpg	Col-0	6146.5	564.075	6.33519
p35S-UBP12_3-2-4_WT_R1_3.jpg	Col-0	2187	200.705	5.30184
p35S-UBP12_3-2-4_WT_R1_3.jpg	Col-0	26469	2429.11	7.79528
p35S-UBP12_3-2-4_WT_R1_3.jpg	Col-0	16432.5	1508.04	7.31857
p35S-UBP12_3-2-4_WT_R1_3.jpg	Col-0	3632.5	333.361	5.80923
p35S-UBP12_3-2-4_WT_R1_4.jpg	Col-0	4679	429.4	6.06239
p35S-UBP12_3-2-4_WT_R1_4.jpg	Col-0	16549	1518.73	7.32563
p35S-UBP12_3-2-4_WT_R1_4.jpg	Col-0	11854.5	1087.91	6.99201
p35S-UBP12_3-2-4_WT_R1_4.jpg	Col-0	30610	2809.13	7.94063
p35S-UBP12_3-2-4_WT_R1_4.jpg	Col-0	18638	1710.44	7.44451
p35S-UBP12_3-2-4_WT_R1_4.jpg	Col-0	16229.5	1489.41	7.30613
p35S-UBP12_3-2-4_WT_R1_4.jpg	Col-0	3492.5	320.513	5.76992
p35S-UBP12_3-2-4_WT_R1_4.jpg	Col-0	2824.5	259.209	5.55764
p35S-UBP12_3-2-4_WT_R1_4.jpg	Col-0	18634.5	1710.12	7.44432
p35S-UBP12_3-2-4_WT_R1_4.jpg	Col-0	25422.5	2333.07	7.75494
p35S-UBP12_3-2-4_WT_R1_4.jpg	Col-0	48026	4407.43	8.39105
p35S-UBP12_3-2-4_WT_R1_4.jpg	Col-0	2448	224.657	5.41458
p35S-UBP12_3-2-4_WT_R1_4.jpg	Col-0	6022	552.649	6.31472
p35S-UBP12_3-2-4_WT_R1_4.jpg	Col-0	4145.5	380.44	5.94133
p35S-UBP12_3-2-4_WT_R1_4.jpg	Col-0	4132	379.201	5.93807
p35S-UBP12_3-2-4_WT_R1_4.jpg	Col-0	2970.5	272.608	5.60803
p35S-UBP12_3-2-4_WT_R1_4.jpg	Col-0	17152.5	1574.11	7.36145
p35S-UBP12_3-2-4_WT_R1_4.jpg	Col-0	14131.5	1296.87	7.16771
p35S-UBP12_3-2-4_WT_R1_4.jpg	Col-0	2062	189.233	5.24298
p35S-UBP12_3-2-4_WT_R1_4.jpg	Col-0	24780.5	2274.15	7.72936
p35S-UBP12_3-2-4_WT_R1_4.jpg	Col-0	5555	509.792	6.234
p35S-UBP12_3-2-4_WT_R1_4.jpg	Col-0	9964	914.414	6.81828
p35S-UBP12_3-2-4_WT_R1_4.jpg	Col-0	4152.5	381.082	5.94301
p35S-UBP12_3-2-4_WT_R1_4.jpg	Col-0	4152	381.036	5.94289
p35S-UBP12_3-2-4_WT_R1_4.jpg	Col-0	9044	829.984	6.72141
p35S-UBP12_3-2-4_WT_R1_4.jpg	Col-0	2162.5	198.456	5.29057
p35S-UBP12_3-2-4_WT_R1_4.jpg	Col-0	7345	674.063	6.51332
p35S-UBP12_3-2-4_WT_R1_4.jpg	Col-0	16625.5	1525.75	7.33024
p35S-UBP12_3-2-4_WT_R1_4.jpg	Col-0	8283.5	760.191	6.63357
p35S-UBP12_3-2-4_WT_R1_4.jpg	Col-0	7223.5	662.913	6.49664
p35S-UBP12_3-2-4_WT_R1_4.jpg	Col-0	15192	1394.2	7.24007
p35S-UBP12_3-2-4_WT_R1_4.jpg	Col-0	3754.5	344.557	5.84226
p35S-UBP12_3-2-4_WT_R1_4.jpg	Col-0	19551	1794.23	7.49233
p35S-UBP12_3-2-4_WT_R1_4.jpg	Col-0	2213	203.091	5.31365
p35S-UBP12_3-2-4_WT_R1_4.jpg	Col-0	1430.5	131.279	4.87733
p35S-UBP12_3-2-4_WT_R1_4.jpg	Col-0	2811	257.97	5.55284
p35S-UBP12_3-2-4_WT_R1_4.jpg	Col-0	30660	2813.72	7.94226
p35S-UBP12_3-2-4_WT_R1_4.jpg	Col-0	73756.5	6768.76	8.82007
p35S-UBP12_3-2-4_WT_R1_4.jpg	Col-0	10785.5	989.804	6.89751
p35S-UBP12_3-2-4_WT_R1_4.jpg	Col-0	18395.5	1688.19	7.43141
p35S-UBP12_3-2-4_WT_R1_4.jpg	Col-0	6939	636.804	6.45646
p35S-UBP12_3-2-4_WT_R1_4.jpg	Col-0	7426	681.497	6.52429
p35S-UBP12_3-2-4_WT_R1_4.jpg	Col-0	13613	1249.29	7.13033
p35S-UBP12_3-2-4_WT_R1_4.jpg	Col-0	12540	1150.82	7.04823
p35S-UBP12_3-2-4_WT_R1_4.jpg	Col-0	68525	6288.66	8.7465
p35S-UBP12_3-2-4_WT_R1_4.jpg	Col-0	25022	2296.31	7.73906
p35S-UBP12_3-2-4_WT_R1_4.jpg	Col-0	4719	433.071	6.0709
p35S-UBP12_3-2-4_WT_R1_4.jpg	Col-0	41548.5	3812.98	8.24617
p35S-UBP12_3-2-4_WT_R1_4.jpg	Col-0	39916	3663.16	8.20608
p35S-UBP12_3-2-4_WT_R1_4.jpg	Col-0	1180.5	108.337	4.68524
p35S-UBP12_3-2-4_WT_R1_4.jpg	Col-0	3841.5	352.541	5.86517
p35S-UBP12_3-2-4_WT_R1_4.jpg	Col-0	48523	4453.04	8.40134
p35S-UBP12_3-2-4_WT_R1_4.jpg	Col-0	5746.5	527.366	6.2679
p35S-UBP12_3-2-4_WT_R1_4.jpg	Col-0	1672	153.442	5.03332
p35S-UBP12_3-2-4_WT_R1_4.jpg	Col-0	1833	168.218	5.12526
p35S-UBP12_3-2-4_WT_R1_4.jpg	Col-0	14132.5	1296.96	7.16778
p35S-UBP12_3-2-4_WT_R1_4.jpg	Col-0	2611.5	239.662	5.47923
p35S-UBP12_3-2-4_WT_R1_4.jpg	Col-0	24090	2210.78	7.7011
p35S-UBP12_3-2-4_WT_R1_4.jpg	Col-0	4111	377.274	5.93297
p35S-UBP12_3-2-4_WT_R1_4.jpg	Col-0	15706.5	1441.41	7.27338
p35S-UBP12_3-2-4_WT_R1_4.jpg	Col-0	21999.5	2018.93	7.61032
p35S-UBP12_3-2-4_WT_R1_4.jpg	Col-0	1729	158.673	5.06685
p35S-UBP12_3-2-4_WT_R1_4.jpg	Col-0	7226	663.143	6.49699
p35S-UBP12_3-2-4_WT_R1_4.jpg	Col-0	24024.5	2204.77	7.69838
p35S-UBP12_3-2-4_WT_R1_4.jpg	Col-0	4125	378.558	5.93637
p35S-UBP12_3-2-4_WT_R1_4.jpg	Col-0	54051.5	4960.4	8.50924
p35S-UBP12_3-2-4_WT_R1_4.jpg	Col-0	51256.5	4703.9	8.45615
p35S-UBP12_3-2-4_WT_R1_4.jpg	Col-0	7868	722.06	6.58211
p35S-UBP12_3-2-4_WT_R1_4.jpg	Col-0	9490.5	870.96	6.7696
p35S-UBP12_3-2-4_WT_R1_4.jpg	Col-0	18500.5	1697.82	7.4371
p35S-UBP12_3-2-4_WT_R1_4.jpg	Col-0	22975.5	2108.5	7.65373
p35S-UBP12_3-2-4_WT_R1_4.jpg	Col-0	1686	154.727	5.04166
p35S-UBP12_3-2-4_WT_R1_4.jpg	Col-0	38358	3520.18	8.16627
p35S-UBP12_3-2-4_WT_R1_4.jpg	Col-0	8930	819.522	6.70872
p35S-UBP12_3-2-4_WT_R1_4.jpg	Col-0	2491	228.603	5.43199
p35S-UBP12_3-2-4_WT_R1_4.jpg	Col-0	5277	484.279	6.18266
p35S-UBP12_3-2-4_WT_R1_4.jpg	Col-0	35607.5	3267.76	8.09186
p35S-UBP12_3-2-4_WT_R1_4.jpg	Col-0	27953	2565.3	7.84983
p35S-UBP12_3-2-4_WT_R1_4.jpg	Col-0	5596.5	513.601	6.24145
p35S-UBP12_3-2-4_WT_R1_4.jpg	Col-0	20786.5	1907.61	7.55361
p35S-UBP12_3-2-4_WT_R1_4.jpg	Col-0	19659	1804.14	7.49784
p35S-UBP12_3-2-4_WT_R1_4.jpg	Col-0	9424	864.857	6.76256
p35S-UBP12_3-2-4_WT_R1_4.jpg	Col-0	15723.5	1442.97	7.27446
p35S-UBP12_3-2-4_WT_R1_4.jpg	Col-0	3547.5	325.56	5.78555
p35S-UBP12_3-2-4_WT_R1_4.jpg	Col-0	3198.5	293.532	5.68199
p35S-UBP12_3-2-4_WT_R1_4.jpg	Col-0	34798	3193.47	8.06886
p35S-UBP12_3-2-4_WT_R1_4.jpg	Col-0	23478.5	2154.66	7.67539
p35S-UBP12_3-2-4_WT_R1_4.jpg	Col-0	20275.5	1860.72	7.52872
p35S-UBP12_3-2-4_WT_R1_4.jpg	Col-0	11442.5	1050.1	6.95664
p35S-UBP12_3-2-4_WT_R1_4.jpg	Col-0	48622	4462.13	8.40338
p35S-UBP12_3-2-4_WT_R1_4.jpg	Col-0	66602.5	6112.23	8.71805
p35S-UBP12_3-2-4_WT_R1_4.jpg	Col-0	11635	1067.76	6.97332
p35S-UBP12_3-2-4_WT_R1_4.jpg	Col-0	29506.5	2707.86	7.90391
p35S-UBP12_3-2-4_WT_R1_4.jpg	Col-0	14524.5	1332.94	7.19514
p35S-UBP12_3-2-4_WT_R1_4.jpg	Col-0	8653.5	794.147	6.67727
p35S-UBP12_3-2-4_WT_R1_4.jpg	Col-0	35668.5	3273.36	8.09357
p35S-UBP12_3-2-4_WT_R2_10.jpg	Col-0	6987	641.209	6.46336
p35S-UBP12_3-2-4_WT_R2_10.jpg	Col-0	11854	1087.86	6.99197
p35S-UBP12_3-2-4_WT_R2_10.jpg	Col-0	2955.5	271.231	5.60297
p35S-UBP12_3-2-4_WT_R2_10.jpg	Col-0	2958	271.461	5.60382
p35S-UBP12_3-2-4_WT_R2_10.jpg	Col-0	2023	185.654	5.22389
p35S-UBP12_3-2-4_WT_R2_10.jpg	Col-0	5419.5	497.357	6.20931
p35S-UBP12_3-2-4_WT_R2_10.jpg	Col-0	2592.5	237.918	5.47193
p35S-UBP12_3-2-4_WT_R2_10.jpg	Col-0	22299.5	2046.46	7.62387
p35S-UBP12_3-2-4_WT_R2_10.jpg	Col-0	3290	301.929	5.71019
p35S-UBP12_3-2-4_WT_R2_10.jpg	Col-0	4205.5	385.946	5.9557
p35S-UBP12_3-2-4_WT_R2_10.jpg	Col-0	10218.5	937.769	6.8435
p35S-UBP12_3-2-4_WT_R2_10.jpg	Col-0	34797	3193.38	8.06884
p35S-UBP12_3-2-4_WT_R2_10.jpg	Col-0	3092	283.758	5.64812
p35S-UBP12_3-2-4_WT_R2_10.jpg	Col-0	218	20.0062	2.99604
p35S-UBP12_3-2-4_WT_R2_10.jpg	Col-0	8596	788.87	6.6706
p35S-UBP12_3-2-4_WT_R2_10.jpg	Col-0	608.5	55.8431	4.02255
p35S-UBP12_3-2-4_WT_R2_10.jpg	Col-0	8621	791.164	6.67351
p35S-UBP12_3-2-4_WT_R2_10.jpg	Col-0	3731.5	342.446	5.83611
p35S-UBP12_3-2-4_WT_R2_10.jpg	Col-0	25144	2307.51	7.74392
p35S-UBP12_3-2-4_WT_R2_10.jpg	Col-0	4099	376.172	5.93005
p35S-UBP12_3-2-4_WT_R2_10.jpg	Col-0	2295.5	210.662	5.35026
p35S-UBP12_3-2-4_WT_R2_10.jpg	Col-0	2871.5	263.523	5.57414
p35S-UBP12_3-2-4_WT_R2_10.jpg	Col-0	20658.5	1895.87	7.54743
p35S-UBP12_3-2-4_WT_R2_10.jpg	Col-0	366	33.5885	3.51418
p35S-UBP12_3-2-4_WT_R2_10.jpg	Col-0	936.5	85.9442	4.4537
p35S-UBP12_3-2-4_WT_R2_10.jpg	Col-0	255.5	23.4477	3.15477
p35S-UBP12_3-2-4_WT_R2_10.jpg	Col-0	29089	2669.55	7.88966
p35S-UBP12_3-2-4_WT_R2_10.jpg	Col-0	15986.5	1467.11	7.29105
p35S-UBP12_3-2-4_WT_R2_10.jpg	Col-0	2237	205.293	5.32444
p35S-UBP12_3-2-4_WT_R2_10.jpg	Col-0	5835	535.488	6.28318
p35S-UBP12_3-2-4_WT_R2_10.jpg	Col-0	2825	259.255	5.55781
p35S-UBP12_3-2-4_WT_R2_10.jpg	Col-0	9357	858.708	6.75543
p35S-UBP12_3-2-4_WT_R2_10.jpg	Col-0	12066	1107.32	7.0097
p35S-UBP12_3-2-4_WT_R2_10.jpg	Col-0	233.5	21.4287	3.06473
p35S-UBP12_3-2-4_WT_R2_10.jpg	Col-0	3347	307.16	5.72737
p35S-UBP12_3-2-4_WT_R2_10.jpg	Col-0	23537.5	2160.08	7.6779
p35S-UBP12_3-2-4_WT_R2_10.jpg	Col-0	3351.5	307.573	5.72871
p35S-UBP12_3-2-4_WT_R2_10.jpg	Col-0	2197	201.623	5.3064
p35S-UBP12_3-2-4_WT_R2_10.jpg	Col-0	1150.5	105.583	4.6595
p35S-UBP12_3-2-4_WT_R2_10.jpg	Col-0	1177	108.015	4.68227
p35S-UBP12_3-2-4_WT_R2_10.jpg	Col-0	2518	231.081	5.44277
p35S-UBP12_3-2-4_WT_R2_10.jpg	Col-0	1194	109.575	4.69661
p35S-UBP12_3-2-4_WT_R2_10.jpg	Col-0	6710	615.788	6.4229
p35S-UBP12_3-2-4_WT_R2_10.jpg	Col-0	5067.5	465.053	6.14215
p35S-UBP12_3-2-4_WT_R2_10.jpg	Col-0	1036	95.0755	4.55467
p35S-UBP12_3-2-4_WT_R2_10.jpg	Col-0	1115	102.325	4.62816
p35S-UBP12_3-2-4_WT_R2_10.jpg	Col-0	13094.5	1201.71	7.0915
p35S-UBP12_3-2-4_WT_R2_10.jpg	Col-0	104640	9602.99	9.16983
p35S-UBP12_3-2-4_WT_R2_10.jpg	Col-0	1152.5	105.767	4.66124
p35S-UBP12_3-2-4_WT_R2_10.jpg	Col-0	654.5	60.0646	4.09542
p35S-UBP12_3-2-4_WT_R2_10.jpg	Col-0	527	48.3637	3.87875
p35S-UBP12_3-2-4_WT_R2_10.jpg	Col-0	3360.5	308.399	5.73139
p35S-UBP12_3-2-4_WT_R2_10.jpg	Col-0	232.5	21.3369	3.06044
p35S-UBP12_3-2-4_WT_R2_10.jpg	Col-0	6878	631.206	6.44763
p35S-UBP12_3-2-4_WT_R2_10.jpg	Col-0	2234	205.018	5.3231
p35S-UBP12_3-2-4_WT_R2_10.jpg	Col-0	10626	975.166	6.88261
p35S-UBP12_3-2-4_WT_R2_10.jpg	Col-0	61773	5669.02	8.64277
p35S-UBP12_3-2-4_WT_R2_10.jpg	Col-0	2772	254.391	5.53887
p35S-UBP12_3-2-4_WT_R2_10.jpg	Col-0	2692	247.05	5.50959
p35S-UBP12_3-2-4_WT_R2_10.jpg	Col-0	15918.5	1460.87	7.28679
p35S-UBP12_3-2-4_WT_R2_10.jpg	Col-0	5950.5	546.088	6.30278
p35S-UBP12_3-2-4_WT_R2_10.jpg	Col-0	4020.5	368.968	5.91071
p35S-UBP12_3-2-4_WT_R2_10.jpg	Col-0	25498.5	2340.04	7.75792
p35S-UBP12_3-2-4_WT_R2_10.jpg	Col-0	2347.5	215.434	5.37266
p35S-UBP12_3-2-4_WT_R2_10.jpg	Col-0	596.5	54.7418	4.00263
p35S-UBP12_3-2-4_WT_R2_10.jpg	Col-0	32816	3011.58	8.01022
p35S-UBP12_3-2-4_WT_R2_10.jpg	Col-0	323.5	29.6882	3.39075
p35S-UBP12_3-2-4_WT_R2_10.jpg	Col-0	31107	2854.74	7.95674
p35S-UBP12_3-2-4_WT_R2_10.jpg	Col-0	7177	658.646	6.49019
p35S-UBP12_3-2-4_WT_R2_10.jpg	Col-0	32483	2981.02	8.00002
p35S-UBP12_3-2-4_WT_R2_10.jpg	Col-0	20469.5	1878.52	7.53824
p35S-UBP12_3-2-4_WT_R2_10.jpg	Col-0	5770	529.523	6.27198
p35S-UBP12_3-2-4_WT_R2_10.jpg	Col-0	9629.5	883.716	6.78414
p35S-UBP12_3-2-4_WT_R2_10.jpg	Col-0	2731.5	250.674	5.52416
p35S-UBP12_3-2-4_WT_R2_10.jpg	Col-0	11492	1054.64	6.96096
p35S-UBP12_3-2-4_WT_R2_10.jpg	Col-0	3765	345.521	5.84505
p35S-UBP12_3-2-4_WT_R2_10.jpg	Col-0	4088.5	375.209	5.92748
p35S-UBP12_3-2-4_WT_R2_10.jpg	Col-0	1977.5	181.479	5.20114
p35S-UBP12_3-2-4_WT_R2_10.jpg	Col-0	4271.5	392.003	5.97127
p35S-UBP12_3-2-4_WT_R2_10.jpg	Col-0	6062	556.32	6.32134
p35S-UBP12_3-2-4_WT_R2_10.jpg	Col-0	1820.5	167.07	5.11842
p35S-UBP12_3-2-4_WT_R2_10.jpg	Col-0	4657.5	427.427	6.05778
p35S-UBP12_3-2-4_WT_R2_10.jpg	Col-0	7152.5	656.397	6.48677
p35S-UBP12_3-2-4_WT_R2_10.jpg	Col-0	18425	1690.89	7.43301
p35S-UBP12_3-2-4_WT_R2_10.jpg	Col-0	11390	1045.28	6.95204
p35S-UBP12_3-2-4_WT_R2_10.jpg	Col-0	36543.5	3353.66	8.11781
p35S-UBP12_3-2-4_WT_R2_10.jpg	Col-0	53276.5	4889.28	8.4948
p35S-UBP12_3-2-4_WT_R2_10.jpg	Col-0	16195.5	1486.29	7.30404
p35S-UBP12_3-2-4_WT_R2_10.jpg	Col-0	15131.5	1388.64	7.23608
p35S-UBP12_3-2-4_WT_R2_10.jpg	Col-0	4842.5	444.405	6.09674
p35S-UBP12_3-2-4_WT_R2_10.jpg	Col-0	4604.5	422.563	6.04634
p35S-UBP12_3-2-4_WT_R2_10.jpg	Col-0	55155.5	5061.72	8.52946
p35S-UBP12_3-2-4_WT_R2_10.jpg	Col-0	2565	235.395	5.46126
p35S-UBP12_3-2-4_WT_R2_10.jpg	Col-0	13553	1243.78	7.12591
p35S-UBP12_3-2-4_WT_R2_10.jpg	Col-0	3771	346.071	5.84664
p35S-UBP12_3-2-4_WT_R2_10.jpg	Col-0	956	87.7338	4.47431
p35S-UBP12_3-2-4_WT_R2_10.jpg	Col-0	3407.5	312.712	5.74528
p35S-UBP12_3-2-4_WT_R2_10.jpg	Col-0	7364.5	675.853	6.51598
p35S-UBP12_3-2-4_WT_R2_10.jpg	Col-0	7967	731.145	6.59461
p35S-UBP12_3-2-4_WT_R2_10.jpg	Col-0	612.5	56.2102	4.0291
p35S-UBP12_3-2-4_WT_R2_10.jpg	Col-0	9365	859.442	6.75628
p35S-UBP12_3-2-4_WT_R2_10.jpg	Col-0	1388.5	127.425	4.84753
p35S-UBP12_3-2-4_WT_R2_10.jpg	Col-0	18188	1669.14	7.42007
p35S-UBP12_3-2-4_WT_R2_10.jpg	Col-0	1907.5	175.055	5.1651
p35S-UBP12_3-2-4_WT_R2_10.jpg	Col-0	1386.5	127.242	4.84609
p35S-UBP12_3-2-4_WT_R2_10.jpg	Col-0	2041	187.306	5.23274
p35S-UBP12_3-2-4_WT_R2_10.jpg	Col-0	2762	253.474	5.53526
p35S-UBP12_3-2-4_WT_R2_10.jpg	Col-0	6025	552.925	6.31522
p35S-UBP12_3-2-4_WT_R2_10.jpg	Col-0	51178	4696.69	8.45461
p35S-UBP12_3-2-4_WT_R2_10.jpg	Col-0	64809.5	5947.68	8.69076
p35S-UBP12_3-2-4_WT_R2_10.jpg	Col-0	3070	281.739	5.64098
p35S-UBP12_3-2-4_WT_R2_10.jpg	Col-0	9281	851.733	6.74727
p35S-UBP12_3-2-4_WT_R2_10.jpg	Col-0	5681	521.355	6.25643
p35S-UBP12_3-2-4_WT_R2_10.jpg	Col-0	4211.5	386.497	5.95712
p35S-UBP12_3-2-4_WT_R2_10.jpg	Col-0	12201.5	1119.75	7.02086
p35S-UBP12_3-2-4_WT_R2_10.jpg	Col-0	6747	619.184	6.4284
p35S-UBP12_3-2-4_WT_R2_10.jpg	Col-0	2166.5	198.823	5.29242
p35S-UBP12_3-2-4_WT_R2_10.jpg	Col-0	8426	773.269	6.65063
p35S-UBP12_3-2-4_WT_R2_10.jpg	Col-0	20574	1888.11	7.54333
p35S-UBP12_3-2-4_WT_R2_10.jpg	Col-0	14544.5	1334.77	7.19652
p35S-UBP12_3-2-4_WT_R2_10.jpg	Col-0	6322.5	580.227	6.36342
p35S-UBP12_3-2-4_WT_R2_10.jpg	Col-0	11441.5	1050.01	6.95655
p35S-UBP12_3-2-4_WT_R2_10.jpg	Col-0	1929.5	177.074	5.17657
p35S-UBP12_3-2-4_WT_R2_10.jpg	Col-0	17049	1564.62	7.3554
p35S-UBP12_3-2-4_WT_R2_10.jpg	Col-0	23355.5	2143.37	7.67014
p35S-UBP12_3-2-4_WT_R2_10.jpg	Col-0	424.5	38.9571	3.66246
p35S-UBP12_3-2-4_WT_R2_10.jpg	Col-0	752.5	69.0582	4.23495
p35S-UBP12_3-2-4_WT_R2_10.jpg	Col-0	5566.5	510.847	6.23607
p35S-UBP12_3-2-4_WT_R2_10.jpg	Col-0	16739.5	1536.21	7.33708
p35S-UBP12_3-2-4_WT_R2_10.jpg	Col-0	2347.5	215.434	5.37266
p35S-UBP12_3-2-4_WT_R2_10.jpg	Col-0	14462.5	1327.25	7.19086
p35S-UBP12_3-2-4_WT_R2_10.jpg	Col-0	4525	415.267	6.02892
p35S-UBP12_3-2-4_WT_R2_10.jpg	Col-0	12317	1130.35	7.03028
p35S-UBP12_3-2-4_WT_R2_10.jpg	Col-0	37679	3457.87	8.14841
p35S-UBP12_3-2-4_WT_R2_10.jpg	Col-0	19762.5	1813.64	7.50309
p35S-UBP12_3-2-4_WT_R2_11.jpg	Col-0	1273	116.825	4.76068
p35S-UBP12_3-2-4_WT_R2_11.jpg	Col-0	1453.5	133.39	4.89328
p35S-UBP12_3-2-4_WT_R2_11.jpg	Col-0	9810	900.281	6.80271
p35S-UBP12_3-2-4_WT_R2_11.jpg	Col-0	4157	381.495	5.9441
p35S-UBP12_3-2-4_WT_R2_11.jpg	Col-0	3333	305.875	5.72318
p35S-UBP12_3-2-4_WT_R2_11.jpg	Col-0	916	84.0629	4.43157
p35S-UBP12_3-2-4_WT_R2_11.jpg	Col-0	2037.5	186.985	5.23103
p35S-UBP12_3-2-4_WT_R2_11.jpg	Col-0	4194.5	384.937	5.95308
p35S-UBP12_3-2-4_WT_R2_11.jpg	Col-0	923.5	84.7512	4.43972
p35S-UBP12_3-2-4_WT_R2_11.jpg	Col-0	5937.5	544.895	6.30059
p35S-UBP12_3-2-4_WT_R2_11.jpg	Col-0	17148	1573.7	7.36119
p35S-UBP12_3-2-4_WT_R2_11.jpg	Col-0	7580.5	695.676	6.54488
p35S-UBP12_3-2-4_WT_R2_11.jpg	Col-0	5326	488.776	6.1919
p35S-UBP12_3-2-4_WT_R2_11.jpg	Col-0	2980	273.48	5.61123
p35S-UBP12_3-2-4_WT_R2_11.jpg	Col-0	671.5	61.6247	4.12106
p35S-UBP12_3-2-4_WT_R2_11.jpg	Col-0	13691	1256.45	7.13604
p35S-UBP12_3-2-4_WT_R2_11.jpg	Col-0	3140	288.163	5.66353
p35S-UBP12_3-2-4_WT_R2_11.jpg	Col-0	6460.5	592.891	6.38501
p35S-UBP12_3-2-4_WT_R2_11.jpg	Col-0	12200	1119.62	7.02074
p35S-UBP12_3-2-4_WT_R2_11.jpg	Col-0	3299.5	302.801	5.71308
p35S-UBP12_3-2-4_WT_R2_11.jpg	Col-0	60452.5	5547.83	8.62116
p35S-UBP12_3-2-4_WT_R2_11.jpg	Col-0	29012	2662.48	7.88701
p35S-UBP12_3-2-4_WT_R2_11.jpg	Col-0	11140	1022.34	6.92985
p35S-UBP12_3-2-4_WT_R2_11.jpg	Col-0	1008.5	92.5518	4.52777
p35S-UBP12_3-2-4_WT_R2_11.jpg	Col-0	365	33.4967	3.51145
p35S-UBP12_3-2-4_WT_R2_11.jpg	Col-0	1297	119.028	4.77936
p35S-UBP12_3-2-4_WT_R2_11.jpg	Col-0	18345	1683.55	7.42866
p35S-UBP12_3-2-4_WT_R2_11.jpg	Col-0	841.5	77.2259	4.34674
p35S-UBP12_3-2-4_WT_R2_11.jpg	Col-0	35517.5	3259.5	8.08933
p35S-UBP12_3-2-4_WT_R2_11.jpg	Col-0	11146	1022.89	6.93039
p35S-UBP12_3-2-4_WT_R2_11.jpg	Col-0	1631	149.68	5.0085
p35S-UBP12_3-2-4_WT_R2_11.jpg	Col-0	7924	727.199	6.5892
p35S-UBP12_3-2-4_WT_R2_11.jpg	Col-0	2686.5	246.545	5.50754
p35S-UBP12_3-2-4_WT_R2_11.jpg	Col-0	315.5	28.954	3.36571
p35S-UBP12_3-2-4_WT_R2_11.jpg	Col-0	150.5	13.8116	2.62551
p35S-UBP12_3-2-4_WT_R2_11.jpg	Col-0	306.5	28.128	3.33677
p35S-UBP12_3-2-4_WT_R2_11.jpg	Col-0	4329	397.28	5.98464
p35S-UBP12_3-2-4_WT_R2_11.jpg	Col-0	1636	150.139	5.01156
p35S-UBP12_3-2-4_WT_R2_11.jpg	Col-0	32308	2964.96	7.99462
p35S-UBP12_3-2-4_WT_R2_11.jpg	Col-0	8218.5	754.226	6.62569
p35S-UBP12_3-2-4_WT_R2_11.jpg	Col-0	3613.5	331.617	5.80398
p35S-UBP12_3-2-4_WT_R2_11.jpg	Col-0	24027.5	2205.05	7.6985
p35S-UBP12_3-2-4_WT_R2_11.jpg	Col-0	1350.5	123.938	4.81978
p35S-UBP12_3-2-4_WT_R2_11.jpg	Col-0	24408	2239.96	7.71422
p35S-UBP12_3-2-4_WT_R2_11.jpg	Col-0	3022.5	277.38	5.62539
p35S-UBP12_3-2-4_WT_R2_11.jpg	Col-0	24101	2211.79	7.70156
p35S-UBP12_3-2-4_WT_R2_11.jpg	Col-0	5964.5	547.373	6.30513
p35S-UBP12_3-2-4_WT_R2_11.jpg	Col-0	14506.5	1331.29	7.1939
p35S-UBP12_3-2-4_WT_R2_11.jpg	Col-0	2412	221.353	5.39976
p35S-UBP12_3-2-4_WT_R2_11.jpg	Col-0	1591	146.009	4.98367
p35S-UBP12_3-2-4_WT_R2_11.jpg	Col-0	24004.5	2202.93	7.69755
p35S-UBP12_3-2-4_WT_R2_11.jpg	Col-0	8353.5	766.615	6.64198
p35S-UBP12_3-2-4_WT_R2_11.jpg	Col-0	4412.5	404.943	6.00375
p35S-UBP12_3-2-4_WT_R2_11.jpg	Col-0	6680	613.035	6.41842
p35S-UBP12_3-2-4_WT_R2_11.jpg	Col-0	18646	1711.18	7.44494
p35S-UBP12_3-2-4_WT_R2_11.jpg	Col-0	23800.5	2184.21	7.68901
p35S-UBP12_3-2-4_WT_R2_11.jpg	Col-0	6219	570.728	6.34691
p35S-UBP12_3-2-4_WT_R2_11.jpg	Col-0	14410	1322.43	7.18723
p35S-UBP12_3-2-4_WT_R2_11.jpg	Col-0	5903	541.729	6.29477
p35S-UBP12_3-2-4_WT_R2_11.jpg	Col-0	3647.5	334.737	5.81335
p35S-UBP12_3-2-4_WT_R2_11.jpg	Col-0	29548	2711.67	7.90532
p35S-UBP12_3-2-4_WT_R2_11.jpg	Col-0	4935.5	452.939	6.11576
p35S-UBP12_3-2-4_WT_R2_11.jpg	Col-0	2218.5	203.596	5.31614
p35S-UBP12_3-2-4_WT_R2_11.jpg	Col-0	4499.5	412.927	6.02327
p35S-UBP12_3-2-4_WT_R2_11.jpg	Col-0	954.5	87.5961	4.47274
p35S-UBP12_3-2-4_WT_R2_11.jpg	Col-0	3143.5	288.484	5.66464
p35S-UBP12_3-2-4_WT_R2_11.jpg	Col-0	675	61.9459	4.12626
p35S-UBP12_3-2-4_WT_R2_11.jpg	Col-0	824.5	75.6658	4.32633
p35S-UBP12_3-2-4_WT_R2_11.jpg	Col-0	1396.5	128.159	4.85327
p35S-UBP12_3-2-4_WT_R2_11.jpg	Col-0	3222.5	295.734	5.68946
p35S-UBP12_3-2-4_WT_R2_11.jpg	Col-0	10138	930.382	6.8356
p35S-UBP12_3-2-4_WT_R2_11.jpg	Col-0	913	83.7876	4.42828
p35S-UBP12_3-2-4_WT_R2_11.jpg	Col-0	245	22.4841	3.11281
p35S-UBP12_3-2-4_WT_R2_11.jpg	Col-0	304.5	27.9445	3.33022
p35S-UBP12_3-2-4_WT_R2_11.jpg	Col-0	6717.5	616.477	6.42402
p35S-UBP12_3-2-4_WT_R2_11.jpg	Col-0	2533.5	232.504	5.44891
p35S-UBP12_3-2-4_WT_R2_11.jpg	Col-0	18047.5	1656.25	7.41231
p35S-UBP12_3-2-4_WT_R2_11.jpg	Col-0	8138	746.838	6.61585
p35S-UBP12_3-2-4_WT_R2_11.jpg	Col-0	37284.5	3421.66	8.13788
p35S-UBP12_3-2-4_WT_R2_11.jpg	Col-0	3459	317.438	5.76028
p35S-UBP12_3-2-4_WT_R2_11.jpg	Col-0	50787	4660.81	8.44694
p35S-UBP12_3-2-4_WT_R2_11.jpg	Col-0	12681.5	1163.8	7.05945
p35S-UBP12_3-2-4_WT_R2_11.jpg	Col-0	57846.5	5308.67	8.5771
p35S-UBP12_3-2-4_WT_R2_11.jpg	Col-0	2012.5	184.691	5.21868
p35S-UBP12_3-2-4_WT_R2_11.jpg	Col-0	9079	833.196	6.72527
p35S-UBP12_3-2-4_WT_R2_11.jpg	Col-0	5223.5	479.37	6.17247
p35S-UBP12_3-2-4_WT_R2_11.jpg	Col-0	1895.5	173.953	5.15879
p35S-UBP12_3-2-4_WT_R2_11.jpg	Col-0	17837.5	1636.98	7.40061
p35S-UBP12_3-2-4_WT_R2_11.jpg	Col-0	6124.5	562.056	6.3316
p35S-UBP12_3-2-4_WT_R2_11.jpg	Col-0	4545.5	417.148	6.03344
p35S-UBP12_3-2-4_WT_R2_11.jpg	Col-0	6086.5	558.569	6.32538
p35S-UBP12_3-2-4_WT_R2_11.jpg	Col-0	822.5	75.4823	4.3239
p35S-UBP12_3-2-4_WT_R2_11.jpg	Col-0	17862.5	1639.27	7.40201
p35S-UBP12_3-2-4_WT_R2_11.jpg	Col-0	19688.5	1806.85	7.49934
p35S-UBP12_3-2-4_WT_R2_11.jpg	Col-0	3695	339.097	5.82628
p35S-UBP12_3-2-4_WT_R2_11.jpg	Col-0	12294.5	1128.29	7.02846
p35S-UBP12_3-2-4_WT_R2_11.jpg	Col-0	4570	419.397	6.03882
p35S-UBP12_3-2-4_WT_R2_11.jpg	Col-0	3548	325.606	5.78569
p35S-UBP12_3-2-4_WT_R2_11.jpg	Col-0	1613	148.028	4.9974
p35S-UBP12_3-2-4_WT_R2_11.jpg	Col-0	7170	658.003	6.48921
p35S-UBP12_3-2-4_WT_R2_11.jpg	Col-0	1420	130.316	4.86996
p35S-UBP12_3-2-4_WT_R2_11.jpg	Col-0	3407.5	312.712	5.74528
p35S-UBP12_3-2-4_WT_R2_11.jpg	Col-0	18870	1731.73	7.45688
p35S-UBP12_3-2-4_WT_R2_11.jpg	Col-0	1640	150.506	5.014
p35S-UBP12_3-2-4_WT_R2_11.jpg	Col-0	39396	3615.44	8.19297
p35S-UBP12_3-2-4_WT_R2_11.jpg	Col-0	33144	3041.68	8.02017
p35S-UBP12_3-2-4_WT_R2_11.jpg	Col-0	3368.5	309.133	5.73377
p35S-UBP12_3-2-4_WT_R2_11.jpg	Col-0	13501	1239.01	7.12207
p35S-UBP12_3-2-4_WT_R2_11.jpg	Col-0	6254.5	573.986	6.35261
p35S-UBP12_3-2-4_WT_R2_11.jpg	Col-0	32316.5	2965.74	7.99488
p35S-UBP12_3-2-4_WT_R2_11.jpg	Col-0	27478	2521.7	7.83269
p35S-UBP12_3-2-4_WT_R2_11.jpg	Col-0	3115.5	285.915	5.65569
p35S-UBP12_3-2-4_WT_R2_11.jpg	Col-0	23058	2116.07	7.65732
p35S-UBP12_3-2-4_WT_R2_11.jpg	Col-0	4115.5	377.687	5.93406
p35S-UBP12_3-2-4_WT_R2_11.jpg	Col-0	1095.5	100.536	4.61052
p35S-UBP12_3-2-4_WT_R2_11.jpg	Col-0	32976.5	3026.31	8.0151
p35S-UBP12_3-2-4_WT_R2_11.jpg	Col-0	1549.5	142.2	4.95724
p35S-UBP12_3-2-4_WT_R2_11.jpg	Col-0	852	78.1895	4.35914
p35S-UBP12_3-2-4_WT_R2_11.jpg	Col-0	1122	102.968	4.63442
p35S-UBP12_3-2-4_WT_R2_11.jpg	Col-0	33115	3039.02	8.01929
p35S-UBP12_3-2-4_WT_R2_11.jpg	Col-0	4253	390.305	5.96693
p35S-UBP12_3-2-4_WT_R2_11.jpg	Col-0	881	80.8509	4.39261
p35S-UBP12_3-2-4_WT_R2_11.jpg	Col-0	14227	1305.64	7.17445
p35S-UBP12_3-2-4_WT_R2_11.jpg	Col-0	6296	577.795	6.35922
p35S-UBP12_3-2-4_WT_R2_11.jpg	Col-0	5079.5	466.155	6.14452
p35S-UBP12_3-2-4_WT_R2_11.jpg	Col-0	12312	1129.89	7.02988
p35S-UBP12_3-2-4_WT_R2_11.jpg	Col-0	20153.5	1849.52	7.52268
p35S-UBP12_3-2-4_WT_R2_11.jpg	Col-0	4299.5	394.573	5.9778
p35S-UBP12_3-2-4_WT_R2_11.jpg	Col-0	2553	234.293	5.45657
p35S-UBP12_3-2-4_WT_R2_11.jpg	Col-0	9980.5	915.928	6.81994
p35S-UBP12_3-2-4_WT_R2_11.jpg	Col-0	15017.5	1378.18	7.22852
p35S-UBP12_3-2-4_WT_R2_11.jpg	Col-0	22980	2108.91	7.65393
p35S-UBP12_3-2-4_WT_R2_11.jpg	Col-0	7837.5	719.261	6.57822
p35S-UBP12_3-2-4_WT_R2_11.jpg	Col-0	21570	1979.52	7.59061
p35S-UBP12_3-2-4_WT_R2_11.jpg	Col-0	1896	173.999	5.15905
p35S-UBP12_3-2-4_WT_R2_11.jpg	Col-0	1893	173.724	5.15747
p35S-UBP12_3-2-4_WT_R2_11.jpg	Col-0	4235	388.653	5.96269
p35S-UBP12_3-2-4_WT_R2_11.jpg	Col-0	3602	330.562	5.80079
p35S-UBP12_3-2-4_WT_R2_11.jpg	Col-0	1610	147.752	4.99554
p35S-UBP12_3-2-4_WT_R2_11.jpg	Col-0	71233.5	6537.22	8.78527
p35S-UBP12_3-2-4_WT_R2_11.jpg	Col-0	4099.5	376.218	5.93017
p35S-UBP12_3-2-4_WT_R2_11.jpg	Col-0	39520	3626.82	8.19611
p35S-UBP12_3-2-4_WT_R2_11.jpg	Col-0	3631.5	333.269	5.80895
p35S-UBP12_3-2-4_WT_R2_11.jpg	Col-0	7953.5	729.907	6.59292
p35S-UBP12_3-2-4_WT_R2_11.jpg	Col-0	2356.5	216.26	5.37648
p35S-UBP12_3-2-4_WT_R2_11.jpg	Col-0	19994	1834.88	7.51474
p35S-UBP12_3-2-4_WT_R2_11.jpg	Col-0	8586	787.952	6.66944
p35S-UBP12_3-2-4_WT_R2_11.jpg	Col-0	16266.5	1492.8	7.30841
p35S-UBP12_3-2-4_WT_R2_11.jpg	Col-0	22419.5	2057.48	7.62924
p35S-UBP12_3-2-4_WT_R2_11.jpg	Col-0	12924.5	1186.1	7.07843
p35S-UBP12_3-2-4_WT_R2_9.jpg	Col-0	2241.5	205.706	5.32645
p35S-UBP12_3-2-4_WT_R2_9.jpg	Col-0	420	38.5441	3.6518
p35S-UBP12_3-2-4_WT_R2_9.jpg	Col-0	13562	1244.61	7.12658
p35S-UBP12_3-2-4_WT_R2_9.jpg	Col-0	2187.5	200.751	5.30206
p35S-UBP12_3-2-4_WT_R2_9.jpg	Col-0	975.5	89.5233	4.4945
p35S-UBP12_3-2-4_WT_R2_9.jpg	Col-0	1997.5	183.314	5.2112
p35S-UBP12_3-2-4_WT_R2_9.jpg	Col-0	49402.5	4533.75	8.41931
p35S-UBP12_3-2-4_WT_R2_9.jpg	Col-0	5635.5	517.18	6.24839
p35S-UBP12_3-2-4_WT_R2_9.jpg	Col-0	14994	1376.03	7.22695
p35S-UBP12_3-2-4_WT_R2_9.jpg	Col-0	3345.5	307.022	5.72692
p35S-UBP12_3-2-4_WT_R2_9.jpg	Col-0	16434	1508.18	7.31866
p35S-UBP12_3-2-4_WT_R2_9.jpg	Col-0	16739.5	1536.21	7.33708
p35S-UBP12_3-2-4_WT_R2_9.jpg	Col-0	187	17.1613	2.84266
p35S-UBP12_3-2-4_WT_R2_9.jpg	Col-0	5782.5	530.67	6.27414
p35S-UBP12_3-2-4_WT_R2_9.jpg	Col-0	1040.5	95.4885	4.55901
p35S-UBP12_3-2-4_WT_R2_9.jpg	Col-0	279	25.6043	3.24276
p35S-UBP12_3-2-4_WT_R2_9.jpg	Col-0	17030.5	1562.92	7.35431
p35S-UBP12_3-2-4_WT_R2_9.jpg	Col-0	2506.5	230.026	5.43819
p35S-UBP12_3-2-4_WT_R2_9.jpg	Col-0	1654	151.79	5.0225
p35S-UBP12_3-2-4_WT_R2_9.jpg	Col-0	1801.5	165.327	5.10792
p35S-UBP12_3-2-4_WT_R2_9.jpg	Col-0	17346	1591.87	7.37267
p35S-UBP12_3-2-4_WT_R2_9.jpg	Col-0	11674.5	1071.39	6.97671
p35S-UBP12_3-2-4_WT_R2_9.jpg	Col-0	2453	225.116	5.41662
p35S-UBP12_3-2-4_WT_R2_9.jpg	Col-0	28954.5	2657.2	7.88503
p35S-UBP12_3-2-4_WT_R2_9.jpg	Col-0	13605	1248.55	7.12974
p35S-UBP12_3-2-4_WT_R2_9.jpg	Col-0	2689	246.774	5.50847
p35S-UBP12_3-2-4_WT_R2_9.jpg	Col-0	1962.5	180.102	5.19352
p35S-UBP12_3-2-4_WT_R2_9.jpg	Col-0	7804	716.187	6.57394
p35S-UBP12_3-2-4_WT_R2_9.jpg	Col-0	5271	483.729	6.18152
p35S-UBP12_3-2-4_WT_R2_9.jpg	Col-0	2042	187.398	5.23323
p35S-UBP12_3-2-4_WT_R2_9.jpg	Col-0	10302	945.432	6.85164
p35S-UBP12_3-2-4_WT_R2_9.jpg	Col-0	9856.5	904.548	6.80744
p35S-UBP12_3-2-4_WT_R2_9.jpg	Col-0	718.5	65.938	4.18871
p35S-UBP12_3-2-4_WT_R2_9.jpg	Col-0	2765.5	253.795	5.53653
p35S-UBP12_3-2-4_WT_R2_9.jpg	Col-0	22167	2034.3	7.61791
p35S-UBP12_3-2-4_WT_R2_9.jpg	Col-0	1219.5	111.916	4.71775
p35S-UBP12_3-2-4_WT_R2_9.jpg	Col-0	9719	891.93	6.79339
p35S-UBP12_3-2-4_WT_R2_9.jpg	Col-0	1729.5	158.719	5.06714
p35S-UBP12_3-2-4_WT_R2_9.jpg	Col-0	904	82.9617	4.41838
p35S-UBP12_3-2-4_WT_R2_9.jpg	Col-0	2127	195.198	5.27402
p35S-UBP12_3-2-4_WT_R2_9.jpg	Col-0	12752.5	1170.32	7.06503
p35S-UBP12_3-2-4_WT_R2_9.jpg	Col-0	6302	578.345	6.36017
p35S-UBP12_3-2-4_WT_R2_9.jpg	Col-0	711.5	65.2956	4.17892
p35S-UBP12_3-2-4_WT_R2_9.jpg	Col-0	2935.5	269.396	5.59618
p35S-UBP12_3-2-4_WT_R2_9.jpg	Col-0	17833	1636.57	7.40036
p35S-UBP12_3-2-4_WT_R2_9.jpg	Col-0	1089.5	99.9853	4.60502
p35S-UBP12_3-2-4_WT_R2_9.jpg	Col-0	7690.5	705.771	6.55929
p35S-UBP12_3-2-4_WT_R2_9.jpg	Col-0	13327.5	1223.09	7.10913
p35S-UBP12_3-2-4_WT_R2_9.jpg	Col-0	5861	537.874	6.28762
p35S-UBP12_3-2-4_WT_R2_9.jpg	Col-0	1770.5	162.482	5.09057
p35S-UBP12_3-2-4_WT_R2_9.jpg	Col-0	35297.5	3239.31	8.08312
p35S-UBP12_3-2-4_WT_R2_9.jpg	Col-0	6072.5	557.284	6.32307
p35S-UBP12_3-2-4_WT_R2_9.jpg	Col-0	642	58.9175	4.07614
p35S-UBP12_3-2-4_WT_R2_9.jpg	Col-0	31649.5	2904.53	7.97403
p35S-UBP12_3-2-4_WT_R2_9.jpg	Col-0	5818	533.928	6.28026
p35S-UBP12_3-2-4_WT_R2_9.jpg	Col-0	27135	2490.23	7.82013
p35S-UBP12_3-2-4_WT_R2_9.jpg	Col-0	12382.5	1136.36	7.03559
p35S-UBP12_3-2-4_WT_R2_9.jpg	Col-0	32555	2987.63	8.00224
p35S-UBP12_3-2-4_WT_R2_9.jpg	Col-0	7086	650.295	6.47743
p35S-UBP12_3-2-4_WT_R2_9.jpg	Col-0	7861	721.418	6.58122
p35S-UBP12_3-2-4_WT_R2_9.jpg	Col-0	20241	1857.55	7.52701
p35S-UBP12_3-2-4_WT_R2_9.jpg	Col-0	3278.5	300.874	5.70669
p35S-UBP12_3-2-4_WT_R2_9.jpg	Col-0	17377.5	1594.76	7.37448
p35S-UBP12_3-2-4_WT_R2_9.jpg	Col-0	22273.5	2044.08	7.6227
p35S-UBP12_3-2-4_WT_R2_9.jpg	Col-0	13721	1259.2	7.13823
p35S-UBP12_3-2-4_WT_R2_9.jpg	Col-0	2151.5	197.447	5.28547
p35S-UBP12_3-2-4_WT_R2_9.jpg	Col-0	17910	1643.63	7.40466
p35S-UBP12_3-2-4_WT_R2_9.jpg	Col-0	3959	363.324	5.8953
p35S-UBP12_3-2-4_WT_R2_9.jpg	Col-0	12932.5	1186.84	7.07905
p35S-UBP12_3-2-4_WT_R2_9.jpg	Col-0	20628.5	1893.11	7.54598
p35S-UBP12_3-2-4_WT_R2_9.jpg	Col-0	11255	1032.89	6.94012
p35S-UBP12_3-2-4_WT_R2_9.jpg	Col-0	8250	757.117	6.62952
p35S-UBP12_3-2-4_WT_R2_9.jpg	Col-0	9238.5	847.833	6.74268
p35S-UBP12_3-2-4_WT_R2_9.jpg	Col-0	3865	354.698	5.87127
p35S-UBP12_3-2-4_WT_R2_9.jpg	Col-0	5726	525.485	6.26432
p35S-UBP12_3-2-4_WT_R2_9.jpg	Col-0	6242	572.839	6.35061
p35S-UBP12_3-2-4_WT_R2_9.jpg	Col-0	4929	452.343	6.11444
p35S-UBP12_3-2-4_WT_R2_9.jpg	Col-0	10960.5	1005.86	6.9136
p35S-UBP12_3-2-4_WT_R2_9.jpg	Col-0	1228.5	112.742	4.7251
p35S-UBP12_3-2-4_WT_R2_9.jpg	Col-0	24984	2292.83	7.73754
p35S-UBP12_3-2-4_WT_R2_9.jpg	Col-0	13462	1235.43	7.11918
p35S-UBP12_3-2-4_WT_R2_9.jpg	Col-0	527	48.3637	3.87875
p35S-UBP12_3-2-4_WT_R2_9.jpg	Col-0	50863.5	4667.83	8.44845
p35S-UBP12_3-2-4_WT_R2_9.jpg	Col-0	2951	270.818	5.60145
p35S-UBP12_3-2-4_WT_R2_9.jpg	Col-0	1397.5	128.251	4.85399
p35S-UBP12_3-2-4_WT_R2_9.jpg	Col-0	16445	1509.19	7.31933
p35S-UBP12_3-2-4_WT_R2_9.jpg	Col-0	21954.5	2014.8	7.60828
p35S-UBP12_3-2-4_WT_R2_9.jpg	Col-0	211.5	19.4097	2.96577
p35S-UBP12_3-2-4_WT_R2_9.jpg	Col-0	430	39.4618	3.67533
p35S-UBP12_3-2-4_WT_R2_9.jpg	Col-0	30777	2824.46	7.94607
p35S-UBP12_3-2-4_WT_R2_9.jpg	Col-0	975.5	89.5233	4.4945
p35S-UBP12_3-2-4_WT_R2_9.jpg	Col-0	15022	1378.6	7.22882
p35S-UBP12_3-2-4_WT_R2_9.jpg	Col-0	16339	1499.46	7.31286
p35S-UBP12_3-2-4_WT_R2_9.jpg	Col-0	2090	191.803	5.25647
p35S-UBP12_3-2-4_WT_R2_9.jpg	Col-0	27068.5	2484.12	7.81768
p35S-UBP12_3-2-4_WT_R2_9.jpg	Col-0	2603.5	238.928	5.47616
p35S-UBP12_3-2-4_WT_R2_9.jpg	Col-0	1277.5	117.238	4.76421
p35S-UBP12_3-2-4_WT_R2_9.jpg	Col-0	4554.5	417.974	6.03542
p35S-UBP12_3-2-4_WT_R2_9.jpg	Col-0	6993.5	641.806	6.46429
p35S-UBP12_3-2-4_WT_R2_9.jpg	Col-0	5108	468.77	6.15011
p35S-UBP12_3-2-4_WT_R2_9.jpg	Col-0	4726	433.713	6.07238
p35S-UBP12_3-2-4_WT_R2_9.jpg	Col-0	29917	2745.54	7.91773
p35S-UBP12_3-2-4_WT_R2_9.jpg	Col-0	3143	288.439	5.66448
p35S-UBP12_3-2-4_WT_R2_9.jpg	Col-0	7655	702.513	6.55466
p35S-UBP12_3-2-4_WT_R2_9.jpg	Col-0	23823	2186.28	7.68996
p35S-UBP12_3-2-4_WT_R2_9.jpg	Col-0	9345	857.607	6.75415
p35S-UBP12_3-2-4_WT_R2_9.jpg	Col-0	4451	408.476	6.01243
p35S-UBP12_3-2-4_WT_R2_9.jpg	Col-0	8274.5	759.365	6.63248
p35S-UBP12_3-2-4_WT_R2_9.jpg	Col-0	44679.5	4100.32	8.31882
p35S-UBP12_3-2-4_WT_R2_9.jpg	Col-0	23840.5	2187.88	7.69069
p35S-UBP12_3-2-4_WT_R2_9.jpg	Col-0	23967.5	2199.54	7.696
p35S-UBP12_3-2-4_WT_R2_9.jpg	Col-0	26726	2452.69	7.80494
p35S-UBP12_3-2-4_WT_R2_9.jpg	Col-0	6528.5	599.132	6.39548
p35S-UBP12_3-2-4_WT_R2_9.jpg	Col-0	1361	124.901	4.82752
p35S-UBP12_3-2-4_WT_R2_9.jpg	Col-0	2805	257.42	5.55071
p35S-UBP12_3-2-4_WT_R2_9.jpg	Col-0	32415.5	2974.83	7.99794
p35S-UBP12_3-2-4_WT_R2_9.jpg	Col-0	18310.5	1680.39	7.42678
p35S-UBP12_3-2-4_WT_R2_9.jpg	Col-0	3640.5	334.095	5.81143
p35S-UBP12_3-2-4_WT_R2_9.jpg	Col-0	1257.5	115.403	4.74843
p35S-UBP12_3-2-4_WT_R2_9.jpg	Col-0	1771.5	162.574	5.09113
p35S-UBP12_3-2-4_WT_R2_9.jpg	Col-0	3213.5	294.908	5.68667
p35S-UBP12_3-2-4_WT_R2_9.jpg	Col-0	5526	507.131	6.22877
p35S-UBP12_3-2-4_WT_R2_9.jpg	Col-0	71096.5	6524.65	8.78334
p35S-UBP12_3-2-4_WT_R2_9.jpg	Col-0	2372	217.683	5.38304
p35S-UBP12_3-2-4_WT_R2_9.jpg	Col-0	4503	413.248	6.02405
p35S-UBP12_3-2-4_WT_R2_9.jpg	Col-0	13923.5	1277.78	7.15288
p35S-UBP12_3-2-4_WT_R2_9.jpg	Col-0	13067	1199.18	7.08939
p35S-UBP12_3-2-4_WT_R2_9.jpg	Col-0	11076	1016.46	6.92408
p35S-UBP12_3-2-4_WT_R2_9.jpg	Col-0	14938.5	1370.93	7.22325
p35S-UBP12_3-2-4_WT_R2_9.jpg	Col-0	17256.5	1583.66	7.36749
p35S-UBP12_3-2-4_WT_R3_12.jpg	Col-0	4543.5	416.965	6.033
p35S-UBP12_3-2-4_WT_R3_12.jpg	Col-0	249	22.8512	3.129
p35S-UBP12_3-2-4_WT_R3_12.jpg	Col-0	345.5	31.7071	3.45654
p35S-UBP12_3-2-4_WT_R3_12.jpg	Col-0	809	74.2433	4.30735
p35S-UBP12_3-2-4_WT_R3_12.jpg	Col-0	826	75.8035	4.32814
p35S-UBP12_3-2-4_WT_R3_12.jpg	Col-0	1088	99.8476	4.60365
p35S-UBP12_3-2-4_WT_R3_12.jpg	Col-0	3082	282.84	5.64488
p35S-UBP12_3-2-4_WT_R3_12.jpg	Col-0	2818.5	258.659	5.55551
p35S-UBP12_3-2-4_WT_R3_12.jpg	Col-0	983	90.2116	4.50216
p35S-UBP12_3-2-4_WT_R3_12.jpg	Col-0	4169.5	382.642	5.9471
p35S-UBP12_3-2-4_WT_R3_12.jpg	Col-0	2759.5	253.244	5.53435
p35S-UBP12_3-2-4_WT_R3_12.jpg	Col-0	24002	2202.71	7.69744
p35S-UBP12_3-2-4_WT_R3_12.jpg	Col-0	5354	491.346	6.19715
p35S-UBP12_3-2-4_WT_R3_12.jpg	Col-0	25604	2349.72	7.76205
p35S-UBP12_3-2-4_WT_R3_12.jpg	Col-0	4152	381.036	5.94289
p35S-UBP12_3-2-4_WT_R3_12.jpg	Col-0	4979	456.931	6.12453
p35S-UBP12_3-2-4_WT_R3_12.jpg	Col-0	12926	1186.24	7.07855
p35S-UBP12_3-2-4_WT_R3_12.jpg	Col-0	269.5	24.7325	3.20812
p35S-UBP12_3-2-4_WT_R3_12.jpg	Col-0	441	40.4713	3.70059
p35S-UBP12_3-2-4_WT_R3_12.jpg	Col-0	15385	1411.91	7.2527
p35S-UBP12_3-2-4_WT_R3_12.jpg	Col-0	14942.5	1371.3	7.22351
p35S-UBP12_3-2-4_WT_R3_12.jpg	Col-0	2909	266.964	5.58711
p35S-UBP12_3-2-4_WT_R3_12.jpg	Col-0	3375.5	309.775	5.73585
p35S-UBP12_3-2-4_WT_R3_12.jpg	Col-0	4260	390.948	5.96857
p35S-UBP12_3-2-4_WT_R3_12.jpg	Col-0	2195.5	201.485	5.30571
p35S-UBP12_3-2-4_WT_R3_12.jpg	Col-0	10838	994.622	6.90236
p35S-UBP12_3-2-4_WT_R3_12.jpg	Col-0	1757	161.243	5.08291
p35S-UBP12_3-2-4_WT_R3_12.jpg	Col-0	21085.5	1935.05	7.56789
p35S-UBP12_3-2-4_WT_R3_12.jpg	Col-0	15540	1426.13	7.26272
p35S-UBP12_3-2-4_WT_R3_12.jpg	Col-0	5836	535.58	6.28335
p35S-UBP12_3-2-4_WT_R3_12.jpg	Col-0	553.5	50.7957	3.92781
p35S-UBP12_3-2-4_WT_R3_12.jpg	Col-0	7986.5	732.935	6.59706
p35S-UBP12_3-2-4_WT_R3_12.jpg	Col-0	958.5	87.9632	4.47692
p35S-UBP12_3-2-4_WT_R3_12.jpg	Col-0	34438	3160.44	8.05846
p35S-UBP12_3-2-4_WT_R3_12.jpg	Col-0	20874.5	1915.69	7.55783
p35S-UBP12_3-2-4_WT_R3_12.jpg	Col-0	53465.5	4906.62	8.49834
p35S-UBP12_3-2-4_WT_R3_12.jpg	Col-0	7800.5	715.865	6.57349
p35S-UBP12_3-2-4_WT_R3_12.jpg	Col-0	4743.5	435.319	6.07608
p35S-UBP12_3-2-4_WT_R3_12.jpg	Col-0	10324	947.451	6.85378
p35S-UBP12_3-2-4_WT_R3_12.jpg	Col-0	46860	4300.42	8.36647
p35S-UBP12_3-2-4_WT_R3_12.jpg	Col-0	5717.5	524.705	6.26284
p35S-UBP12_3-2-4_WT_R3_12.jpg	Col-0	2660.5	244.159	5.49782
p35S-UBP12_3-2-4_WT_R3_12.jpg	Col-0	7218	662.408	6.49588
p35S-UBP12_3-2-4_WT_R3_12.jpg	Col-0	583.5	53.5488	3.98059
p35S-UBP12_3-2-4_WT_R3_12.jpg	Col-0	1149	105.446	4.6582
p35S-UBP12_3-2-4_WT_R3_12.jpg	Col-0	11587.5	1063.41	6.96923
p35S-UBP12_3-2-4_WT_R3_12.jpg	Col-0	8574.5	786.897	6.6681
p35S-UBP12_3-2-4_WT_R3_12.jpg	Col-0	2009.5	184.415	5.21719
p35S-UBP12_3-2-4_WT_R3_12.jpg	Col-0	1874	171.98	5.14738
p35S-UBP12_3-2-4_WT_R3_12.jpg	Col-0	10081	925.151	6.82996
p35S-UBP12_3-2-4_WT_R3_12.jpg	Col-0	13280.5	1218.77	7.1056
p35S-UBP12_3-2-4_WT_R3_12.jpg	Col-0	4501.5	413.11	6.02372
p35S-UBP12_3-2-4_WT_R3_12.jpg	Col-0	39371	3613.15	8.19233
p35S-UBP12_3-2-4_WT_R3_12.jpg	Col-0	6485.5	595.186	6.38887
p35S-UBP12_3-2-4_WT_R3_12.jpg	Col-0	664.5	60.9823	4.11058
p35S-UBP12_3-2-4_WT_R3_12.jpg	Col-0	26970.5	2475.13	7.81405
p35S-UBP12_3-2-4_WT_R3_12.jpg	Col-0	2041	187.306	5.23274
p35S-UBP12_3-2-4_WT_R3_12.jpg	Col-0	5085.5	466.705	6.1457
p35S-UBP12_3-2-4_WT_R3_12.jpg	Col-0	17751	1629.04	7.39575
p35S-UBP12_3-2-4_WT_R3_12.jpg	Col-0	6603.5	606.015	6.4069
p35S-UBP12_3-2-4_WT_R3_12.jpg	Col-0	2681	246.04	5.50549
p35S-UBP12_3-2-4_WT_R3_12.jpg	Col-0	6997.5	642.173	6.46486
p35S-UBP12_3-2-4_WT_R3_12.jpg	Col-0	10655.5	977.874	6.88538
p35S-UBP12_3-2-4_WT_R3_12.jpg	Col-0	16839.5	1545.39	7.34303
p35S-UBP12_3-2-4_WT_R3_12.jpg	Col-0	14347	1316.65	7.18285
p35S-UBP12_3-2-4_WT_R3_12.jpg	Col-0	23372.5	2144.93	7.67086
p35S-UBP12_3-2-4_WT_R3_12.jpg	Col-0	2218	203.55	5.31591
p35S-UBP12_3-2-4_WT_R3_12.jpg	Col-0	1277	117.193	4.76382
p35S-UBP12_3-2-4_WT_R3_12.jpg	Col-0	2131	195.566	5.2759
p35S-UBP12_3-2-4_WT_R3_12.jpg	Col-0	6607.5	606.382	6.40751
p35S-UBP12_3-2-4_WT_R3_12.jpg	Col-0	11709.5	1074.6	6.9797
p35S-UBP12_3-2-4_WT_R3_12.jpg	Col-0	6351	582.842	6.36792
p35S-UBP12_3-2-4_WT_R3_12.jpg	Col-0	2275.5	208.827	5.3415
p35S-UBP12_3-2-4_WT_R3_12.jpg	Col-0	7652	702.237	6.55427
p35S-UBP12_3-2-4_WT_R3_12.jpg	Col-0	636.5	58.4127	4.06753
p35S-UBP12_3-2-4_WT_R3_12.jpg	Col-0	23714.5	2176.32	7.68539
p35S-UBP12_3-2-4_WT_R3_12.jpg	Col-0	13474	1236.53	7.12007
p35S-UBP12_3-2-4_WT_R3_12.jpg	Col-0	20977	1925.1	7.56273
p35S-UBP12_3-2-4_WT_R3_12.jpg	Col-0	344.5	31.6154	3.45364
p35S-UBP12_3-2-4_WT_R3_12.jpg	Col-0	17130	1572.05	7.36014
p35S-UBP12_3-2-4_WT_R3_12.jpg	Col-0	2413.5	221.491	5.40038
p35S-UBP12_3-2-4_WT_R3_12.jpg	Col-0	218	20.0062	2.99604
p35S-UBP12_3-2-4_WT_R3_12.jpg	Col-0	217	19.9145	2.99145
p35S-UBP12_3-2-4_WT_R3_12.jpg	Col-0	4660.5	427.702	6.05843
p35S-UBP12_3-2-4_WT_R3_12.jpg	Col-0	13508	1239.65	7.12259
p35S-UBP12_3-2-4_WT_R3_12.jpg	Col-0	6503	596.792	6.39157
p35S-UBP12_3-2-4_WT_R3_12.jpg	Col-0	1683	154.452	5.03988
p35S-UBP12_3-2-4_WT_R3_12.jpg	Col-0	69635.5	6390.57	8.76258
p35S-UBP12_3-2-4_WT_R3_12.jpg	Col-0	12333	1131.82	7.03158
p35S-UBP12_3-2-4_WT_R3_12.jpg	Col-0	3017	276.875	5.62357
p35S-UBP12_3-2-4_WT_R3_12.jpg	Col-0	4667.5	428.345	6.05993
p35S-UBP12_3-2-4_WT_R3_12.jpg	Col-0	38224	3507.88	8.16277
p35S-UBP12_3-2-4_WT_R3_12.jpg	Col-0	7941.5	728.805	6.59141
p35S-UBP12_3-2-4_WT_R3_12.jpg	Col-0	219.5	20.1439	3.0029
p35S-UBP12_3-2-4_WT_R3_12.jpg	Col-0	202	18.5379	2.91982
p35S-UBP12_3-2-4_WT_R3_12.jpg	Col-0	709	65.0662	4.1754
p35S-UBP12_3-2-4_WT_R3_12.jpg	Col-0	6104	560.175	6.32825
p35S-UBP12_3-2-4_WT_R3_12.jpg	Col-0	19104.5	1753.25	7.46923
p35S-UBP12_3-2-4_WT_R3_12.jpg	Col-0	2757.5	253.061	5.53363
p35S-UBP12_3-2-4_WT_R3_12.jpg	Col-0	3176.5	291.513	5.67508
p35S-UBP12_3-2-4_WT_R3_12.jpg	Col-0	2580.5	236.817	5.46729
p35S-UBP12_3-2-4_WT_R3_12.jpg	Col-0	15082	1384.1	7.23281
p35S-UBP12_3-2-4_WT_R3_12.jpg	Col-0	1894.5	173.862	5.15826
p35S-UBP12_3-2-4_WT_R3_12.jpg	Col-0	18885.5	1733.16	7.4577
p35S-UBP12_3-2-4_WT_R3_12.jpg	Col-0	8398.5	770.745	6.64736
p35S-UBP12_3-2-4_WT_R3_12.jpg	Col-0	3797.5	348.503	5.85365
p35S-UBP12_3-2-4_WT_R3_12.jpg	Col-0	3194.5	293.165	5.68073
p35S-UBP12_3-2-4_WT_R3_12.jpg	Col-0	24888	2284.01	7.73369
p35S-UBP12_3-2-4_WT_R3_12.jpg	Col-0	2478	227.41	5.42676
p35S-UBP12_3-2-4_WT_R3_12.jpg	Col-0	45143	4142.85	8.32914
p35S-UBP12_3-2-4_WT_R3_12.jpg	Col-0	1969.5	180.744	5.19708
p35S-UBP12_3-2-4_WT_R3_12.jpg	Col-0	702.5	64.4696	4.16619
p35S-UBP12_3-2-4_WT_R3_12.jpg	Col-0	451.5	41.4349	3.72412
p35S-UBP12_3-2-4_WT_R3_12.jpg	Col-0	29785	2733.42	7.91331
p35S-UBP12_3-2-4_WT_R3_12.jpg	Col-0	12719	1167.24	7.0624
p35S-UBP12_3-2-4_WT_R3_12.jpg	Col-0	13387	1228.55	7.11359
p35S-UBP12_3-2-4_WT_R3_12.jpg	Col-0	2107.5	193.409	5.26481
p35S-UBP12_3-2-4_WT_R3_12.jpg	Col-0	2279.5	209.194	5.34326
p35S-UBP12_3-2-4_WT_R3_12.jpg	Col-0	12223	1121.73	7.02262
p35S-UBP12_3-2-4_WT_R3_12.jpg	Col-0	5418	497.219	6.20903
p35S-UBP12_3-2-4_WT_R3_12.jpg	Col-0	45507.5	4176.3	8.33718
p35S-UBP12_3-2-4_WT_R3_12.jpg	Col-0	2706.5	248.38	5.51496
p35S-UBP12_3-2-4_WT_R3_12.jpg	Col-0	4489	411.963	6.02093
p35S-UBP12_3-2-4_WT_R3_12.jpg	Col-0	1311	120.313	4.79009
p35S-UBP12_3-2-4_WT_R3_12.jpg	Col-0	31313	2873.65	7.96334
p35S-UBP12_3-2-4_WT_R3_12.jpg	Col-0	3190.5	292.798	5.67948
p35S-UBP12_3-2-4_WT_R3_12.jpg	Col-0	19809	1817.91	7.50544
p35S-UBP12_3-2-4_WT_R3_12.jpg	Col-0	1584	145.366	4.97926
p35S-UBP12_3-2-4_WT_R3_12.jpg	Col-0	1233	113.155	4.72875
p35S-UBP12_3-2-4_WT_R3_12.jpg	Col-0	5770	529.523	6.27198
p35S-UBP12_3-2-4_WT_R3_12.jpg	Col-0	14280.5	1310.55	7.1782
p35S-UBP12_3-2-4_WT_R3_12.jpg	Col-0	11039.5	1013.11	6.92078
p35S-UBP12_3-2-4_WT_R3_12.jpg	Col-0	78320	7187.56	8.88011
p35S-UBP12_3-2-4_WT_R3_12.jpg	Col-0	2596.5	238.285	5.47347
p35S-UBP12_3-2-4_WT_R3_12.jpg	Col-0	7005.5	642.907	6.466
p35S-UBP12_3-2-4_WT_R3_12.jpg	Col-0	8328	764.275	6.63893
p35S-UBP12_3-2-4_WT_R3_12.jpg	Col-0	2750	252.372	5.53091
p35S-UBP12_3-2-4_WT_R3_12.jpg	Col-0	5267	483.362	6.18077
p35S-UBP12_3-2-4_WT_R3_12.jpg	Col-0	15959	1464.59	7.28933
p35S-UBP12_3-2-4_WT_R3_12.jpg	Col-0	40614	3727.22	8.22342
p35S-UBP12_3-2-4_WT_R3_12.jpg	Col-0	24893.5	2284.52	7.73391
p35S-UBP12_3-2-4_WT_R3_12.jpg	Col-0	6001	550.722	6.31123
p35S-UBP12_3-2-4_WT_R3_5.jpg	Col-0	27494.5	2523.22	7.83329
p35S-UBP12_3-2-4_WT_R3_5.jpg	Col-0	12994	1192.48	7.08379
p35S-UBP12_3-2-4_WT_R3_5.jpg	Col-0	1666.5	152.938	5.03003
p35S-UBP12_3-2-4_WT_R3_5.jpg	Col-0	3057	280.546	5.63674
p35S-UBP12_3-2-4_WT_R3_5.jpg	Col-0	2666	244.663	5.49988
p35S-UBP12_3-2-4_WT_R3_5.jpg	Col-0	1416	129.949	4.86714
p35S-UBP12_3-2-4_WT_R3_5.jpg	Col-0	5985	549.254	6.30856
p35S-UBP12_3-2-4_WT_R3_5.jpg	Col-0	1201	110.218	4.70246
p35S-UBP12_3-2-4_WT_R3_5.jpg	Col-0	1536	140.961	4.94849
p35S-UBP12_3-2-4_WT_R3_5.jpg	Col-0	6348.5	582.613	6.36752
p35S-UBP12_3-2-4_WT_R3_5.jpg	Col-0	1235.5	113.384	4.73078
p35S-UBP12_3-2-4_WT_R3_5.jpg	Col-0	2113.5	193.96	5.26765
p35S-UBP12_3-2-4_WT_R3_5.jpg	Col-0	7328.5	672.549	6.51108
p35S-UBP12_3-2-4_WT_R3_5.jpg	Col-0	33315.5	3057.42	8.02533
p35S-UBP12_3-2-4_WT_R3_5.jpg	Col-0	6369	584.494	6.37075
p35S-UBP12_3-2-4_WT_R3_5.jpg	Col-0	17084	1567.83	7.35745
p35S-UBP12_3-2-4_WT_R3_5.jpg	Col-0	2778.5	254.988	5.54122
p35S-UBP12_3-2-4_WT_R3_5.jpg	Col-0	1620.5	148.716	5.00204
p35S-UBP12_3-2-4_WT_R3_5.jpg	Col-0	6378	585.32	6.37216
p35S-UBP12_3-2-4_WT_R3_5.jpg	Col-0	2205.5	202.403	5.31026
p35S-UBP12_3-2-4_WT_R3_5.jpg	Col-0	1244	114.164	4.73764
p35S-UBP12_3-2-4_WT_R3_5.jpg	Col-0	31907.5	2928.21	7.98215
p35S-UBP12_3-2-4_WT_R3_5.jpg	Col-0	7636.5	700.815	6.55224
p35S-UBP12_3-2-4_WT_R3_5.jpg	Col-0	23319.5	2140.07	7.66859
p35S-UBP12_3-2-4_WT_R3_5.jpg	Col-0	18453.5	1693.51	7.43456
p35S-UBP12_3-2-4_WT_R3_5.jpg	Col-0	1265	116.091	4.75438
p35S-UBP12_3-2-4_WT_R3_5.jpg	Col-0	3647.5	334.737	5.81335
p35S-UBP12_3-2-4_WT_R3_5.jpg	Col-0	5441.5	499.376	6.21336
p35S-UBP12_3-2-4_WT_R3_5.jpg	Col-0	16987	1558.93	7.35175
p35S-UBP12_3-2-4_WT_R3_5.jpg	Col-0	13171.5	1208.77	7.09736
p35S-UBP12_3-2-4_WT_R3_5.jpg	Col-0	810	74.3351	4.30858
p35S-UBP12_3-2-4_WT_R3_5.jpg	Col-0	9179	842.373	6.73622
p35S-UBP12_3-2-4_WT_R3_5.jpg	Col-0	6397.5	587.11	6.37521
p35S-UBP12_3-2-4_WT_R3_5.jpg	Col-0	10212.5	937.219	6.84292
p35S-UBP12_3-2-4_WT_R3_5.jpg	Col-0	4395.5	403.383	5.99989
p35S-UBP12_3-2-4_WT_R3_5.jpg	Col-0	3935	361.122	5.88922
p35S-UBP12_3-2-4_WT_R3_5.jpg	Col-0	19022	1745.68	7.4649
p35S-UBP12_3-2-4_WT_R3_5.jpg	Col-0	31043	2848.87	7.95468
p35S-UBP12_3-2-4_WT_R3_5.jpg	Col-0	596	54.696	4.00179
p35S-UBP12_3-2-4_WT_R3_5.jpg	Col-0	210.5	19.318	2.96103
p35S-UBP12_3-2-4_WT_R3_5.jpg	Col-0	5560	510.251	6.2349
p35S-UBP12_3-2-4_WT_R3_5.jpg	Col-0	17534	1609.13	7.38345
p35S-UBP12_3-2-4_WT_R3_5.jpg	Col-0	3844	352.771	5.86582
p35S-UBP12_3-2-4_WT_R3_5.jpg	Col-0	13504.5	1239.33	7.12233
p35S-UBP12_3-2-4_WT_R3_5.jpg	Col-0	2171.5	199.282	5.29472
p35S-UBP12_3-2-4_WT_R3_5.jpg	Col-0	2305	211.534	5.35439
p35S-UBP12_3-2-4_WT_R3_5.jpg	Col-0	36786.5	3375.96	8.12444
p35S-UBP12_3-2-4_WT_R3_5.jpg	Col-0	5726.5	525.531	6.26441
p35S-UBP12_3-2-4_WT_R3_5.jpg	Col-0	25472	2337.61	7.75688
p35S-UBP12_3-2-4_WT_R3_5.jpg	Col-0	42634	3912.6	8.27196
p35S-UBP12_3-2-4_WT_R3_5.jpg	Col-0	22080.5	2026.37	7.614
p35S-UBP12_3-2-4_WT_R3_5.jpg	Col-0	1491.5	136.878	4.91909
p35S-UBP12_3-2-4_WT_R3_5.jpg	Col-0	1739.5	159.637	5.0729
p35S-UBP12_3-2-4_WT_R3_5.jpg	Col-0	1503	137.933	4.92677
p35S-UBP12_3-2-4_WT_R3_5.jpg	Col-0	11762.5	1079.47	6.98422
p35S-UBP12_3-2-4_WT_R3_5.jpg	Col-0	616.5	56.5773	4.03561
p35S-UBP12_3-2-4_WT_R3_5.jpg	Col-0	2823.5	259.117	5.55728
p35S-UBP12_3-2-4_WT_R3_5.jpg	Col-0	7479	686.361	6.5314
p35S-UBP12_3-2-4_WT_R3_5.jpg	Col-0	2479.5	227.548	5.42736
p35S-UBP12_3-2-4_WT_R3_5.jpg	Col-0	15890.5	1458.3	7.28503
p35S-UBP12_3-2-4_WT_R3_5.jpg	Col-0	5167	474.185	6.1616
p35S-UBP12_3-2-4_WT_R3_5.jpg	Col-0	319.5	29.3211	3.37831
p35S-UBP12_3-2-4_WT_R3_5.jpg	Col-0	10753.5	986.867	6.89454
p35S-UBP12_3-2-4_WT_R3_5.jpg	Col-0	5466.5	501.67	6.21794
p35S-UBP12_3-2-4_WT_R3_5.jpg	Col-0	1186.5	108.887	4.69031
p35S-UBP12_3-2-4_WT_R3_5.jpg	Col-0	2305	211.534	5.35439
p35S-UBP12_3-2-4_WT_R3_5.jpg	Col-0	7739	710.221	6.56558
p35S-UBP12_3-2-4_WT_R3_5.jpg	Col-0	5783.5	530.762	6.27431
p35S-UBP12_3-2-4_WT_R3_5.jpg	Col-0	2577	236.496	5.46593
p35S-UBP12_3-2-4_WT_R3_5.jpg	Col-0	3473	318.723	5.76432
p35S-UBP12_3-2-4_WT_R3_5.jpg	Col-0	13558	1244.24	7.12628
p35S-UBP12_3-2-4_WT_R3_5.jpg	Col-0	736	67.544	4.21278
p35S-UBP12_3-2-4_WT_R3_5.jpg	Col-0	6955.5	638.318	6.45884
p35S-UBP12_3-2-4_WT_R3_5.jpg	Col-0	7497.5	688.059	6.53387
p35S-UBP12_3-2-4_WT_R3_5.jpg	Col-0	333.5	30.6059	3.42119
p35S-UBP12_3-2-4_WT_R3_5.jpg	Col-0	2895.5	265.725	5.58246
p35S-UBP12_3-2-4_WT_R3_5.jpg	Col-0	5894	540.903	6.29324
p35S-UBP12_3-2-4_WT_R3_5.jpg	Col-0	13446.5	1234.01	7.11802
p35S-UBP12_3-2-4_WT_R3_5.jpg	Col-0	17025.5	1562.46	7.35402
p35S-UBP12_3-2-4_WT_R3_5.jpg	Col-0	21218	1947.21	7.57415
p35S-UBP12_3-2-4_WT_R3_5.jpg	Col-0	8420	772.718	6.64991
p35S-UBP12_3-2-4_WT_R3_5.jpg	Col-0	1207	110.768	4.70744
p35S-UBP12_3-2-4_WT_R3_5.jpg	Col-0	21074.5	1934.04	7.56737
p35S-UBP12_3-2-4_WT_R3_5.jpg	Col-0	976	89.5692	4.49501
p35S-UBP12_3-2-4_WT_R3_5.jpg	Col-0	16676	1530.39	7.33327
p35S-UBP12_3-2-4_WT_R3_5.jpg	Col-0	10048	922.122	6.82668
p35S-UBP12_3-2-4_WT_R3_5.jpg	Col-0	3647	334.692	5.81321
p35S-UBP12_3-2-4_WT_R3_5.jpg	Col-0	15273.5	1401.68	7.24542
p35S-UBP12_3-2-4_WT_R3_5.jpg	Col-0	23276	2136.08	7.66673
p35S-UBP12_3-2-4_WT_R3_5.jpg	Col-0	3699.5	339.51	5.8275
p35S-UBP12_3-2-4_WT_R3_5.jpg	Col-0	1825	167.483	5.12088
p35S-UBP12_3-2-4_WT_R3_5.jpg	Col-0	1419.5	130.27	4.86961
p35S-UBP12_3-2-4_WT_R3_5.jpg	Col-0	19301	1771.29	7.47946
p35S-UBP12_3-2-4_WT_R3_5.jpg	Col-0	7900.5	725.043	6.58623
p35S-UBP12_3-2-4_WT_R3_5.jpg	Col-0	5402.5	495.797	6.20617
p35S-UBP12_3-2-4_WT_R3_5.jpg	Col-0	17604	1615.55	7.38743
p35S-UBP12_3-2-4_WT_R3_5.jpg	Col-0	4503.5	413.294	6.02416
p35S-UBP12_3-2-4_WT_R3_5.jpg	Col-0	9053.5	830.855	6.72246
p35S-UBP12_3-2-4_WT_R3_5.jpg	Col-0	2364	216.948	5.37966
p35S-UBP12_3-2-4_WT_R3_5.jpg	Col-0	15988	1467.25	7.29114
p35S-UBP12_3-2-4_WT_R3_5.jpg	Col-0	11482.5	1053.77	6.96013
p35S-UBP12_3-2-4_WT_R3_5.jpg	Col-0	18981	1741.92	7.46274
p35S-UBP12_3-2-4_WT_R3_5.jpg	Col-0	1225.5	112.466	4.72265
p35S-UBP12_3-2-4_WT_R3_5.jpg	Col-0	7286.5	668.695	6.50533
p35S-UBP12_3-2-4_WT_R3_5.jpg	Col-0	2972.5	272.791	5.60871
p35S-UBP12_3-2-4_WT_R3_5.jpg	Col-0	7913.5	726.236	6.58787
p35S-UBP12_3-2-4_WT_R3_5.jpg	Col-0	14922	1369.42	7.22214
p35S-UBP12_3-2-4_WT_R3_5.jpg	Col-0	11772.5	1080.38	6.98507
p35S-UBP12_3-2-4_WT_R3_5.jpg	Col-0	7942.5	728.897	6.59153
p35S-UBP12_3-2-4_WT_R3_5.jpg	Col-0	8518.5	781.758	6.66154
p35S-UBP12_3-2-4_WT_R3_5.jpg	Col-0	611.5	56.1184	4.02746
p35S-UBP12_3-2-4_WT_R3_5.jpg	Col-0	10891	999.486	6.90724
p35S-UBP12_3-2-4_WT_R3_5.jpg	Col-0	710	65.1579	4.17681
p35S-UBP12_3-2-4_WT_R3_5.jpg	Col-0	1386	127.196	4.84573
p35S-UBP12_3-2-4_WT_R3_5.jpg	Col-0	2368	217.315	5.38135
p35S-UBP12_3-2-4_WT_R3_5.jpg	Col-0	13850.5	1271.08	7.14763
p35S-UBP12_3-2-4_WT_R3_5.jpg	Col-0	1325.5	121.643	4.80109
p35S-UBP12_3-2-4_WT_R3_5.jpg	Col-0	30921.5	2837.72	7.95076
p35S-UBP12_3-2-4_WT_R3_5.jpg	Col-0	29995.5	2752.74	7.92035
p35S-UBP12_3-2-4_WT_R3_5.jpg	Col-0	1203.5	110.447	4.70454
p35S-UBP12_3-2-4_WT_R3_5.jpg	Col-0	3423	314.135	5.74982
p35S-UBP12_3-2-4_WT_R3_5.jpg	Col-0	2733.5	250.858	5.52489
p35S-UBP12_3-2-4_WT_R3_5.jpg	Col-0	5220.5	479.094	6.1719
p35S-UBP12_3-2-4_WT_R3_5.jpg	Col-0	2227.5	204.422	5.32018
p35S-UBP12_3-2-4_WT_R3_5.jpg	Col-0	23021	2112.68	7.65571
p35S-UBP12_3-2-4_WT_R3_5.jpg	Col-0	3604	330.745	5.80135
p35S-UBP12_3-2-4_WT_R3_5.jpg	Col-0	6220	570.82	6.34707
p35S-UBP12_3-2-4_WT_R3_5.jpg	Col-0	8407	771.525	6.64837
p35S-UBP12_3-2-4_WT_R3_5.jpg	Col-0	1983	181.983	5.20392
p35S-UBP12_3-2-4_WT_R3_5.jpg	Col-0	826.5	75.8493	4.32875
p35S-UBP12_3-2-4_WT_R3_5.jpg	Col-0	3837.5	352.174	5.86413
p35S-UBP12_3-2-4_WT_R3_5.jpg	Col-0	28612	2625.77	7.87313
p35S-UBP12_3-2-4_WT_R3_5.jpg	Col-0	20196	1853.42	7.52479
p35S-UBP12_3-2-4_WT_R3_5.jpg	Col-0	3979.5	365.206	5.90046
p35S-UBP12_3-2-4_WT_R3_5.jpg	Col-0	40477	3714.64	8.22004
p35S-UBP12_3-2-4_WT_R3_5.jpg	Col-0	25644.5	2353.44	7.76363
p35S-UBP12_3-2-4_WT_R3_5.jpg	Col-0	13230.5	1214.19	7.10183
p35S-UBP12_3-2-4_WT_R3_5.jpg	Col-0	25278.5	2319.85	7.74926
p35S-UBP12_3-2-4_WT_R3_5.jpg	Col-0	3666	336.435	5.81841
p35S-UBP12_3-2-4_WT_R3_5.jpg	Col-0	2324.5	213.323	5.36281
p35S-UBP12_3-2-4_WT_R3_5.jpg	Col-0	34875	3200.54	8.07107
p35S-UBP12_3-2-4_WT_R3_5.jpg	Col-0	2894.5	265.633	5.58212
p35S-UBP12_3-2-4_WT_R3_5.jpg	Col-0	9097.5	834.893	6.7273
p35S-UBP12_3-2-4_WT_R3_5.jpg	Col-0	1516	139.126	4.93538
p35S-UBP12_3-2-4_WT_R3_5.jpg	Col-0	4015	368.464	5.90934
p35S-UBP12_3-2-4_WT_R3_5.jpg	Col-0	11710	1074.65	6.97975
p35S-UBP12_3-2-4_WT_R3_5.jpg	Col-0	7299.5	669.888	6.50711
p35S-UBP12_3-2-4_WT_R3_5.jpg	Col-0	82697.5	7589.29	8.93449
p35S-UBP12_3-2-4_WT_R3_5.jpg	Col-0	4082.5	374.658	5.92601
p35S-UBP12_3-2-4_WT_R3_6.jpg	Col-0	2182	200.246	5.29955
p35S-UBP12_3-2-4_WT_R3_6.jpg	Col-0	4704	431.694	6.06772
p35S-UBP12_3-2-4_WT_R3_6.jpg	Col-0	1756.5	161.197	5.08263
p35S-UBP12_3-2-4_WT_R3_6.jpg	Col-0	1210.5	111.09	4.71034
p35S-UBP12_3-2-4_WT_R3_6.jpg	Col-0	12762	1171.19	7.06578
p35S-UBP12_3-2-4_WT_R3_6.jpg	Col-0	6656	610.833	6.41482
p35S-UBP12_3-2-4_WT_R3_6.jpg	Col-0	10235.5	939.33	6.84517
p35S-UBP12_3-2-4_WT_R3_6.jpg	Col-0	12830	1177.43	7.07109
p35S-UBP12_3-2-4_WT_R3_6.jpg	Col-0	505.5	46.3906	3.8371
p35S-UBP12_3-2-4_WT_R3_6.jpg	Col-0	24314	2231.34	7.71036
p35S-UBP12_3-2-4_WT_R3_6.jpg	Col-0	4060.5	372.639	5.92061
p35S-UBP12_3-2-4_WT_R3_6.jpg	Col-0	17490.5	1605.13	7.38096
p35S-UBP12_3-2-4_WT_R3_6.jpg	Col-0	1489.5	136.694	4.91774
p35S-UBP12_3-2-4_WT_R3_6.jpg	Col-0	4222	387.46	5.95961
p35S-UBP12_3-2-4_WT_R3_6.jpg	Col-0	2159.5	198.181	5.28918
p35S-UBP12_3-2-4_WT_R3_6.jpg	Col-0	1997.5	183.314	5.2112
p35S-UBP12_3-2-4_WT_R3_6.jpg	Col-0	20977.5	1925.14	7.56275
p35S-UBP12_3-2-4_WT_R3_6.jpg	Col-0	2539	233.008	5.45107
p35S-UBP12_3-2-4_WT_R3_6.jpg	Col-0	5657	519.153	6.2522
p35S-UBP12_3-2-4_WT_R3_6.jpg	Col-0	2772.5	254.437	5.53905
p35S-UBP12_3-2-4_WT_R3_6.jpg	Col-0	14038.5	1288.34	7.16111
p35S-UBP12_3-2-4_WT_R3_6.jpg	Col-0	21021	1929.13	7.56483
p35S-UBP12_3-2-4_WT_R3_6.jpg	Col-0	13956	1280.77	7.15521
p35S-UBP12_3-2-4_WT_R3_6.jpg	Col-0	4192	384.707	5.95248
p35S-UBP12_3-2-4_WT_R3_6.jpg	Col-0	35687.5	3275.1	8.0941
p35S-UBP12_3-2-4_WT_R3_6.jpg	Col-0	14242.5	1307.06	7.17553
p35S-UBP12_3-2-4_WT_R3_6.jpg	Col-0	2943.5	270.13	5.5989
p35S-UBP12_3-2-4_WT_R3_6.jpg	Col-0	1874	171.98	5.14738
p35S-UBP12_3-2-4_WT_R3_6.jpg	Col-0	1923	176.477	5.17319
p35S-UBP12_3-2-4_WT_R3_6.jpg	Col-0	2478.5	227.456	5.42696
p35S-UBP12_3-2-4_WT_R3_6.jpg	Col-0	29140.5	2674.27	7.89143
p35S-UBP12_3-2-4_WT_R3_6.jpg	Col-0	30915.5	2837.17	7.95056
p35S-UBP12_3-2-4_WT_R3_6.jpg	Col-0	5580	512.086	6.23849
p35S-UBP12_3-2-4_WT_R3_6.jpg	Col-0	7171	658.095	6.48935
p35S-UBP12_3-2-4_WT_R3_6.jpg	Col-0	1049.5	96.3144	4.56762
p35S-UBP12_3-2-4_WT_R3_6.jpg	Col-0	4754.5	436.329	6.0784
p35S-UBP12_3-2-4_WT_R3_6.jpg	Col-0	808	74.1516	4.30611
p35S-UBP12_3-2-4_WT_R3_6.jpg	Col-0	865.5	79.4284	4.37486
p35S-UBP12_3-2-4_WT_R3_6.jpg	Col-0	51630	4738.17	8.46341
p35S-UBP12_3-2-4_WT_R3_6.jpg	Col-0	7237	664.152	6.49851
p35S-UBP12_3-2-4_WT_R3_6.jpg	Col-0	3149	288.989	5.66639
p35S-UBP12_3-2-4_WT_R3_6.jpg	Col-0	12061	1106.86	7.00928
p35S-UBP12_3-2-4_WT_R3_6.jpg	Col-0	16360	1501.39	7.31414
p35S-UBP12_3-2-4_WT_R3_6.jpg	Col-0	11839.5	1086.53	6.99075
p35S-UBP12_3-2-4_WT_R3_6.jpg	Col-0	23801.5	2184.3	7.68905
p35S-UBP12_3-2-4_WT_R3_6.jpg	Col-0	36665.5	3364.86	8.12114
p35S-UBP12_3-2-4_WT_R3_6.jpg	Col-0	4704	431.694	6.06772
p35S-UBP12_3-2-4_WT_R3_6.jpg	Col-0	494.5	45.3811	3.8151
p35S-UBP12_3-2-4_WT_R3_6.jpg	Col-0	8578	787.218	6.66851
p35S-UBP12_3-2-4_WT_R3_6.jpg	Col-0	1887	173.173	5.15429
p35S-UBP12_3-2-4_WT_R3_6.jpg	Col-0	451.5	41.4349	3.72412
p35S-UBP12_3-2-4_WT_R3_6.jpg	Col-0	375	34.4144	3.53848
p35S-UBP12_3-2-4_WT_R3_6.jpg	Col-0	1919	176.11	5.17111
p35S-UBP12_3-2-4_WT_R3_6.jpg	Col-0	56935.5	5225.07	8.56122
p35S-UBP12_3-2-4_WT_R3_6.jpg	Col-0	1520.5	139.539	4.93834
p35S-UBP12_3-2-4_WT_R3_6.jpg	Col-0	985.5	90.441	4.5047
p35S-UBP12_3-2-4_WT_R3_6.jpg	Col-0	42514.5	3901.63	8.26915
p35S-UBP12_3-2-4_WT_R3_6.jpg	Col-0	10670	979.204	6.88674
p35S-UBP12_3-2-4_WT_R3_6.jpg	Col-0	8336.5	765.055	6.63995
p35S-UBP12_3-2-4_WT_R3_6.jpg	Col-0	4120.5	378.145	5.93528
p35S-UBP12_3-2-4_WT_R3_6.jpg	Col-0	13301	1220.66	7.10714
p35S-UBP12_3-2-4_WT_R3_6.jpg	Col-0	6602.5	605.923	6.40675
p35S-UBP12_3-2-4_WT_R3_6.jpg	Col-0	20279	1861.04	7.52889
p35S-UBP12_3-2-4_WT_R3_6.jpg	Col-0	4149	380.761	5.94217
p35S-UBP12_3-2-4_WT_R3_6.jpg	Col-0	5321	488.317	6.19097
p35S-UBP12_3-2-4_WT_R3_6.jpg	Col-0	26489	2430.94	7.79603
p35S-UBP12_3-2-4_WT_R3_6.jpg	Col-0	10430.5	957.225	6.86404
p35S-UBP12_3-2-4_WT_R3_6.jpg	Col-0	27442.5	2518.45	7.8314
p35S-UBP12_3-2-4_WT_R3_6.jpg	Col-0	33573.5	3081.1	8.03304
p35S-UBP12_3-2-4_WT_R3_6.jpg	Col-0	10675.5	979.709	6.88726
p35S-UBP12_3-2-4_WT_R3_6.jpg	Col-0	9920.5	910.422	6.81391
p35S-UBP12_3-2-4_WT_R3_6.jpg	Col-0	1487.5	136.51	4.9164
p35S-UBP12_3-2-4_WT_R3_6.jpg	Col-0	15182	1393.28	7.23941
p35S-UBP12_3-2-4_WT_R3_6.jpg	Col-0	28608	2625.41	7.87299
p35S-UBP12_3-2-4_WT_R3_6.jpg	Col-0	4820.5	442.386	6.09218
p35S-UBP12_3-2-4_WT_R3_6.jpg	Col-0	14818	1359.87	7.21515
p35S-UBP12_3-2-4_WT_R3_6.jpg	Col-0	18787.5	1724.16	7.4525
p35S-UBP12_3-2-4_WT_R3_6.jpg	Col-0	4636.5	425.5	6.05326
p35S-UBP12_3-2-4_WT_R3_6.jpg	Col-0	1553.5	142.567	4.95981
p35S-UBP12_3-2-4_WT_R3_6.jpg	Col-0	12032.5	1104.24	7.00692
p35S-UBP12_3-2-4_WT_R3_6.jpg	Col-0	8800.5	807.637	6.69411
p35S-UBP12_3-2-4_WT_R3_6.jpg	Col-0	2484.5	228.007	5.42938
p35S-UBP12_3-2-4_WT_R3_6.jpg	Col-0	33154	3042.6	8.02047
p35S-UBP12_3-2-4_WT_R3_6.jpg	Col-0	4736	434.631	6.0745
p35S-UBP12_3-2-4_WT_R3_6.jpg	Col-0	4463.5	409.623	6.01524
p35S-UBP12_3-2-4_WT_R3_6.jpg	Col-0	16524.5	1516.48	7.32415
p35S-UBP12_3-2-4_WT_R3_6.jpg	Col-0	12083	1108.88	7.0111
p35S-UBP12_3-2-4_WT_R3_6.jpg	Col-0	1078.5	98.9758	4.59488
p35S-UBP12_3-2-4_WT_R3_6.jpg	Col-0	14912	1368.5	7.22147
p35S-UBP12_3-2-4_WT_R3_6.jpg	Col-0	31898	2927.33	7.98185
p35S-UBP12_3-2-4_WT_R3_6.jpg	Col-0	3186	292.385	5.67807
p35S-UBP12_3-2-4_WT_R3_6.jpg	Col-0	2389	219.243	5.39018
p35S-UBP12_3-2-4_WT_R3_6.jpg	Col-0	5841	536.039	6.28421
p35S-UBP12_3-2-4_WT_R3_6.jpg	Col-0	11955	1097.13	7.00045
p35S-UBP12_3-2-4_WT_R3_6.jpg	Col-0	745.5	68.4158	4.2256
p35S-UBP12_3-2-4_WT_R3_6.jpg	Col-0	11138	1022.15	6.92967
p35S-UBP12_3-2-4_WT_R3_6.jpg	Col-0	11877	1089.97	6.99391
p35S-UBP12_3-2-4_WT_R3_6.jpg	Col-0	29582.5	2714.84	7.90649
p35S-UBP12_3-2-4_WT_R3_6.jpg	Col-0	31853.5	2923.25	7.98045
p35S-UBP12_3-2-4_WT_R3_6.jpg	Col-0	3867.5	354.927	5.87191
p35S-UBP12_3-2-4_WT_R3_6.jpg	Col-0	5846	536.498	6.28506
p35S-UBP12_3-2-4_WT_R3_6.jpg	Col-0	1079	99.0217	4.59534
p35S-UBP12_3-2-4_WT_R3_6.jpg	Col-0	2398.5	220.115	5.39415
p35S-UBP12_3-2-4_WT_R3_6.jpg	Col-0	1859.5	170.65	5.13961
p35S-UBP12_3-2-4_WT_R3_6.jpg	Col-0	188	17.2531	2.84799
p35S-UBP12_3-2-4_WT_R3_6.jpg	Col-0	251.5	23.0806	3.13899
p35S-UBP12_3-2-4_WT_R3_6.jpg	Col-0	1130	103.702	4.64152
p35S-UBP12_3-2-4_WT_R3_6.jpg	Col-0	9820.5	901.244	6.80378
p35S-UBP12_3-2-4_WT_R3_6.jpg	Col-0	7479.5	686.407	6.53147
p35S-UBP12_3-2-4_WT_R3_6.jpg	Col-0	10116.5	928.409	6.83347
p35S-UBP12_3-2-4_WT_R3_6.jpg	Col-0	10969	1006.64	6.91438
p35S-UBP12_3-2-4_WT_R3_6.jpg	Col-0	14850	1362.81	7.2173
p35S-UBP12_3-2-4_WT_R3_6.jpg	Col-0	12318.5	1130.49	7.03041
p35S-UBP12_3-2-4_WT_R3_6.jpg	Col-0	54983	5045.89	8.52633
p35S-UBP12_3-2-4_WT_R3_6.jpg	Col-0	42877	3934.9	8.27764
p35S-UBP12_3-2-4_WT_R3_6.jpg	Col-0	1338	122.791	4.81048
p35S-UBP12_3-2-4_WT_R3_6.jpg	Col-0	30541.5	2802.85	7.93839
p35S-UBP12_3-2-4_WT_R3_6.jpg	Col-0	2208	202.632	5.31139
p35S-UBP12_3-2-4_WT_R3_6.jpg	Col-0	23030.5	2113.55	7.65612
p35S-UBP12_3-2-4_WT_R3_6.jpg	Col-0	3071	281.831	5.64131
p35S-UBP12_3-2-4_WT_R3_6.jpg	Col-0	638	58.5504	4.06989
p35S-UBP12_3-2-4_WT_R3_6.jpg	Col-0	2688.5	246.728	5.50829
p35S-UBP12_3-2-4_WT_R3_6.jpg	Col-0	20098.5	1844.47	7.51995
p35S-UBP12_3-2-4_WT_R3_6.jpg	Col-0	1497	137.382	4.92277
p35S-UBP12_3-2-4_WT_R3_6.jpg	Col-0	16443	1509	7.3192
p35S-UBP12_3-2-4_WT_R3_6.jpg	Col-0	4569.5	419.351	6.03871
p35S-UBP12_3-2-4_WT_R3_6.jpg	Col-0	3856	353.872	5.86893
p35S-UBP12_3-2-4_WT_R3_6.jpg	Col-0	13158.5	1207.58	7.09637
p35S-UBP12_3-2-4_WT_R3_6.jpg	Col-0	20514.5	1882.65	7.54044
p35S-UBP12_3-2-4_WT_R3_6.jpg	Col-0	12394	1137.42	7.03652
p35S-UBP12_3-2-4_WT_R3_6.jpg	Col-0	58879.5	5403.47	8.5948
p35S-UBP12_3-2-4_WT_R3_6.jpg	Col-0	18212.5	1671.39	7.42141
R1-35S-UBP12-homo-1.jpg	35S::UBP12_3.2	11547	1059.69	6.96573
R1-35S-UBP12-homo-1.jpg	35S::UBP12_3.2	9126.5	837.555	6.73049
R1-35S-UBP12-homo-1.jpg	35S::UBP12_3.2	24748	2271.17	7.72805
R1-35S-UBP12-homo-1.jpg	35S::UBP12_3.2	24878	2283.1	7.73329
R1-35S-UBP12-homo-1.jpg	35S::UBP12_3.2	16152	1482.3	7.30135
R1-35S-UBP12-homo-1.jpg	35S::UBP12_3.2	4146.5	380.532	5.94157
R1-35S-UBP12-homo-1.jpg	35S::UBP12_3.2	48253	4428.26	8.39576
R1-35S-UBP12-homo-1.jpg	35S::UBP12_3.2	42672	3916.08	8.27285
R1-35S-UBP12-homo-1.jpg	35S::UBP12_3.2	758.5	69.6089	4.24289
R1-35S-UBP12-homo-1.jpg	35S::UBP12_3.2	22881.5	2099.87	7.64963
R1-35S-UBP12-homo-1.jpg	35S::UBP12_3.2	6492	595.782	6.38988
R1-35S-UBP12-homo-1.jpg	35S::UBP12_3.2	4700.5	431.373	6.06697
R1-35S-UBP12-homo-1.jpg	35S::UBP12_3.2	15835.5	1453.25	7.28156
R1-35S-UBP12-homo-1.jpg	35S::UBP12_3.2	15513.5	1423.7	7.26101
R1-35S-UBP12-homo-1.jpg	35S::UBP12_3.2	267	24.5031	3.1988
R1-35S-UBP12-homo-1.jpg	35S::UBP12_3.2	57067	5237.14	8.56353
R1-35S-UBP12-homo-1.jpg	35S::UBP12_3.2	2556	234.569	5.45775
R1-35S-UBP12-homo-1.jpg	35S::UBP12_3.2	4105	376.723	5.93151
R1-35S-UBP12-homo-1.jpg	35S::UBP12_3.2	2252	206.67	5.33112
R1-35S-UBP12-homo-1.jpg	35S::UBP12_3.2	751	68.9206	4.23295
R1-35S-UBP12-homo-1.jpg	35S::UBP12_3.2	2132.5	195.703	5.2766
R1-35S-UBP12-homo-1.jpg	35S::UBP12_3.2	15109	1386.58	7.23459
R1-35S-UBP12-homo-1.jpg	35S::UBP12_3.2	31569.5	2897.19	7.9715
R1-35S-UBP12-homo-1.jpg	35S::UBP12_3.2	3416	313.492	5.74777
R1-35S-UBP12-homo-1.jpg	35S::UBP12_3.2	12013.5	1102.5	7.00534
R1-35S-UBP12-homo-1.jpg	35S::UBP12_3.2	6030	553.384	6.31605
R1-35S-UBP12-homo-1.jpg	35S::UBP12_3.2	20275.5	1860.72	7.52872
R1-35S-UBP12-homo-1.jpg	35S::UBP12_3.2	11633	1067.58	6.97315
R1-35S-UBP12-homo-1.jpg	35S::UBP12_3.2	31359.5	2877.92	7.96482
R1-35S-UBP12-homo-1.jpg	35S::UBP12_3.2	4246	389.663	5.96528
R1-35S-UBP12-homo-1.jpg	35S::UBP12_3.2	50286.5	4614.88	8.43704
R1-35S-UBP12-homo-1.jpg	35S::UBP12_3.2	1451.5	133.207	4.8919
R1-35S-UBP12-homo-1.jpg	35S::UBP12_3.2	6942	637.079	6.45689
R1-35S-UBP12-homo-1.jpg	35S::UBP12_3.2	2278.5	209.102	5.34282
R1-35S-UBP12-homo-1.jpg	35S::UBP12_3.2	46502.5	4267.62	8.35881
R1-35S-UBP12-homo-1.jpg	35S::UBP12_3.2	28185.5	2586.63	7.85811
R1-35S-UBP12-homo-1.jpg	35S::UBP12_3.2	42242.5	3876.67	8.26273
R1-35S-UBP12-homo-1.jpg	35S::UBP12_3.2	633.5	58.1374	4.06281
R1-35S-UBP12-homo-1.jpg	35S::UBP12_3.2	42648.5	3913.93	8.2723
R1-35S-UBP12-homo-1.jpg	35S::UBP12_3.2	295.5	27.1185	3.30022
R1-35S-UBP12-homo-1.jpg	35S::UBP12_3.2	1956.5	179.551	5.19046
R1-35S-UBP12-homo-1.jpg	35S::UBP12_3.2	1116	102.417	4.62906
R1-35S-UBP12-homo-1.jpg	35S::UBP12_3.2	2951.5	270.864	5.60162
R1-35S-UBP12-homo-1.jpg	35S::UBP12_3.2	29287	2687.72	7.89645
R1-35S-UBP12-homo-1.jpg	35S::UBP12_3.2	12095.5	1110.03	7.01214
R1-35S-UBP12-homo-1.jpg	35S::UBP12_3.2	20019	1837.18	7.51599
R1-35S-UBP12-homo-1.jpg	35S::UBP12_3.2	1261	115.724	4.75121
R1-35S-UBP12-homo-1.jpg	35S::UBP12_3.2	14382.5	1319.91	7.18532
R1-35S-UBP12-homo-1.jpg	35S::UBP12_3.2	2899.5	266.092	5.58384
R1-35S-UBP12-homo-1.jpg	35S::UBP12_3.2	10799.5	991.089	6.8988
R1-35S-UBP12-homo-1.jpg	35S::UBP12_3.2	4460.5	409.348	6.01457
R1-35S-UBP12-homo-1.jpg	35S::UBP12_3.2	883.5	81.0803	4.39544
R1-35S-UBP12-homo-1.jpg	35S::UBP12_3.2	8111.5	744.406	6.61259
R1-35S-UBP12-homo-1.jpg	35S::UBP12_3.2	3467	318.173	5.76259
R1-35S-UBP12-homo-1.jpg	35S::UBP12_3.2	12930.5	1186.65	7.07889
R1-35S-UBP12-homo-1.jpg	35S::UBP12_3.2	4698	431.144	6.06644
R1-35S-UBP12-homo-1.jpg	35S::UBP12_3.2	29631	2719.29	7.90813
R1-35S-UBP12-homo-1.jpg	35S::UBP12_3.2	5107.5	468.724	6.15001
R1-35S-UBP12-homo-1.jpg	35S::UBP12_3.2	12426.5	1140.4	7.03914
R1-35S-UBP12-homo-1.jpg	35S::UBP12_3.2	1066	97.8287	4.58322
R1-35S-UBP12-homo-1.jpg	35S::UBP12_3.2	11983	1099.7	7.00279
R1-35S-UBP12-homo-1.jpg	35S::UBP12_3.2	6262	574.675	6.3538
R1-35S-UBP12-homo-1.jpg	35S::UBP12_3.2	14474	1328.3	7.19166
R1-35S-UBP12-homo-1.jpg	35S::UBP12_3.2	2227.5	204.422	5.32018
R1-35S-UBP12-homo-1.jpg	35S::UBP12_3.2	20776.5	1906.7	7.55313
R1-35S-UBP12-homo-1.jpg	35S::UBP12_3.2	63317.5	5810.76	8.66747
R1-35S-UBP12-homo-1.jpg	35S::UBP12_3.2	9103.5	835.444	6.72796
R1-35S-UBP12-homo-1.jpg	35S::UBP12_3.2	14014.5	1286.14	7.1594
R1-35S-UBP12-homo-1.jpg	35S::UBP12_3.2	24481	2246.66	7.7172
R1-35S-UBP12-homo-1.jpg	35S::UBP12_3.2	6101	559.899	6.32776
R1-35S-UBP12-homo-1.jpg	35S::UBP12_3.2	20107	1845.25	7.52037
R1-35S-UBP12-homo-1.jpg	35S::UBP12_3.2	23496.5	2156.31	7.67616
R1-35S-UBP12-homo-1.jpg	35S::UBP12_3.2	949	87.0914	4.46696
R1-35S-UBP12-homo-1.jpg	35S::UBP12_3.2	1265.5	116.137	4.75477
R1-35S-UBP12-homo-1.jpg	35S::UBP12_3.2	502.5	46.1153	3.83114
R1-35S-UBP12-homo-1.jpg	35S::UBP12_3.2	13108	1202.94	7.09253
R1-35S-UBP12-homo-1.jpg	35S::UBP12_3.2	276.5	25.3749	3.23376
R1-35S-UBP12-homo-1.jpg	35S::UBP12_3.2	855.5	78.5107	4.36324
R1-35S-UBP12-homo-1.jpg	35S::UBP12_3.2	3168.5	290.779	5.67256
R1-35S-UBP12-homo-1.jpg	35S::UBP12_3.2	34378	3154.93	8.05672
R1-35S-UBP12-homo-1.jpg	35S::UBP12_3.2	14370.5	1318.81	7.18448
R1-35S-UBP12-homo-1.jpg	35S::UBP12_3.2	2354	216.031	5.37542
R1-35S-UBP12-homo-1.jpg	35S::UBP12_3.2	2371	217.591	5.38262
R1-35S-UBP12-homo-1.jpg	35S::UBP12_3.2	23619.5	2167.6	7.68138
R1-35S-UBP12-homo-1.jpg	35S::UBP12_3.2	35995.5	3303.37	8.1027
R1-35S-UBP12-homo-1.jpg	35S::UBP12_3.2	43395.5	3982.48	8.28966
R1-35S-UBP12-homo-1.jpg	35S::UBP12_3.2	46446.5	4262.48	8.35761
R1-35S-UBP12-homo-1.jpg	35S::UBP12_3.2	9396	862.287	6.75959
R1-35S-UBP12-homo-1.jpg	35S::UBP12_3.2	2678	245.765	5.50437
R1-35S-UBP12-homo-1.jpg	35S::UBP12_3.2	20091	1843.79	7.51958
R1-35S-UBP12-homo-1.jpg	35S::UBP12_3.2	22657.5	2079.32	7.6398
R1-35S-UBP12-homo-1.jpg	35S::UBP12_3.2	16619.5	1525.2	7.32988
R1-35S-UBP12-homo-1.jpg	35S::UBP12_3.2	23218.5	2130.8	7.66425
R1-35S-UBP12-homo-1.jpg	35S::UBP12_3.2	25752	2363.31	7.76782
R1-35S-UBP12-homo-1.jpg	35S::UBP12_3.2	21523	1975.2	7.58843
R1-35S-UBP12-homo-1.jpg	35S::UBP12_3.2	25384	2329.53	7.75342
R1-35S-UBP12-homo-1.jpg	35S::UBP12_3.2	41720.5	3828.76	8.2503
R1-35S-UBP12-homo-6.jpg	35S::UBP12_3.2	435.5	39.9666	3.68804
R1-35S-UBP12-homo-6.jpg	35S::UBP12_3.2	10777.5	989.07	6.89677
R1-35S-UBP12-homo-6.jpg	35S::UBP12_3.2	790.5	72.5456	4.28421
R1-35S-UBP12-homo-6.jpg	35S::UBP12_3.2	7453	683.975	6.52792
R1-35S-UBP12-homo-6.jpg	35S::UBP12_3.2	4239	389.02	5.96363
R1-35S-UBP12-homo-6.jpg	35S::UBP12_3.2	875.5	80.3462	4.38634
R1-35S-UBP12-homo-6.jpg	35S::UBP12_3.2	2873	263.66	5.57466
R1-35S-UBP12-homo-6.jpg	35S::UBP12_3.2	21240.5	1949.28	7.57521
R1-35S-UBP12-homo-6.jpg	35S::UBP12_3.2	5571	511.26	6.23688
R1-35S-UBP12-homo-6.jpg	35S::UBP12_3.2	16251	1491.38	7.30746
R1-35S-UBP12-homo-6.jpg	35S::UBP12_3.2	26821	2461.41	7.80849
R1-35S-UBP12-homo-6.jpg	35S::UBP12_3.2	2313	212.268	5.35785
R1-35S-UBP12-homo-6.jpg	35S::UBP12_3.2	2034.5	186.71	5.22955
R1-35S-UBP12-homo-6.jpg	35S::UBP12_3.2	780	71.582	4.27084
R1-35S-UBP12-homo-6.jpg	35S::UBP12_3.2	13599.5	1248.05	7.12934
R1-35S-UBP12-homo-6.jpg	35S::UBP12_3.2	951	87.2749	4.46906
R1-35S-UBP12-homo-6.jpg	35S::UBP12_3.2	849.5	77.9601	4.3562
R1-35S-UBP12-homo-6.jpg	35S::UBP12_3.2	27528	2526.29	7.83451
R1-35S-UBP12-homo-6.jpg	35S::UBP12_3.2	3195.5	293.257	5.68105
R1-35S-UBP12-homo-6.jpg	35S::UBP12_3.2	2132.5	195.703	5.2766
R1-35S-UBP12-homo-6.jpg	35S::UBP12_3.2	26283	2412.04	7.78823
R1-35S-UBP12-homo-6.jpg	35S::UBP12_3.2	27520.5	2525.6	7.83424
R1-35S-UBP12-homo-6.jpg	35S::UBP12_3.2	10959	1005.73	6.91347
R1-35S-UBP12-homo-6.jpg	35S::UBP12_3.2	2907.5	266.826	5.5866
R1-35S-UBP12-homo-6.jpg	35S::UBP12_3.2	3085.5	283.162	5.64602
R1-35S-UBP12-homo-6.jpg	35S::UBP12_3.2	24783.5	2274.42	7.72948
R1-35S-UBP12-homo-6.jpg	35S::UBP12_3.2	6549	601.013	6.39862
R1-35S-UBP12-homo-6.jpg	35S::UBP12_3.2	2628	241.176	5.48553
R1-35S-UBP12-homo-6.jpg	35S::UBP12_3.2	6676	612.668	6.41782
R1-35S-UBP12-homo-6.jpg	35S::UBP12_3.2	12483	1145.59	7.04367
R1-35S-UBP12-homo-6.jpg	35S::UBP12_3.2	18923	1736.6	7.45968
R1-35S-UBP12-homo-6.jpg	35S::UBP12_3.2	3186	292.385	5.67807
R1-35S-UBP12-homo-6.jpg	35S::UBP12_3.2	497.5	45.6564	3.82114
R1-35S-UBP12-homo-6.jpg	35S::UBP12_3.2	7800	715.82	6.57343
R1-35S-UBP12-homo-6.jpg	35S::UBP12_3.2	18797	1725.03	7.453
R1-35S-UBP12-homo-6.jpg	35S::UBP12_3.2	1679	154.085	5.0375
R1-35S-UBP12-homo-6.jpg	35S::UBP12_3.2	7952	729.769	6.59273
R1-35S-UBP12-homo-6.jpg	35S::UBP12_3.2	28691.5	2633.07	7.87591
R1-35S-UBP12-homo-6.jpg	35S::UBP12_3.2	21582	1980.62	7.59116
R1-35S-UBP12-homo-6.jpg	35S::UBP12_3.2	297.5	27.3021	3.30696
R1-35S-UBP12-homo-6.jpg	35S::UBP12_3.2	578	53.0441	3.97112
R1-35S-UBP12-homo-6.jpg	35S::UBP12_3.2	2204.5	202.311	5.30981
R1-35S-UBP12-homo-6.jpg	35S::UBP12_3.2	5615.5	515.344	6.24484
R1-35S-UBP12-homo-6.jpg	35S::UBP12_3.2	1644	150.873	5.01644
R1-35S-UBP12-homo-6.jpg	35S::UBP12_3.2	906.5	83.1911	4.42114
R1-35S-UBP12-homo-6.jpg	35S::UBP12_3.2	11159	1024.08	6.93155
R1-35S-UBP12-homo-6.jpg	35S::UBP12_3.2	3134	287.613	5.66161
R1-35S-UBP12-homo-6.jpg	35S::UBP12_3.2	743	68.1864	4.22225
R1-35S-UBP12-homo-6.jpg	35S::UBP12_3.2	47148	4326.85	8.3726
R1-35S-UBP12-homo-6.jpg	35S::UBP12_3.2	16977.5	1558.05	7.35119
R1-35S-UBP12-homo-6.jpg	35S::UBP12_3.2	4644.5	426.234	6.05499
R1-35S-UBP12-homo-6.jpg	35S::UBP12_3.2	9942	912.395	6.81607
R1-35S-UBP12-homo-6.jpg	35S::UBP12_3.2	900.5	82.6404	4.4145
R1-35S-UBP12-homo-6.jpg	35S::UBP12_3.2	1079	99.0217	4.59534
R1-35S-UBP12-homo-6.jpg	35S::UBP12_3.2	39314	3607.91	8.19089
R1-35S-UBP12-homo-6.jpg	35S::UBP12_3.2	1869	171.521	5.14471
R1-35S-UBP12-homo-6.jpg	35S::UBP12_3.2	4397	403.52	6.00023
R1-35S-UBP12-homo-6.jpg	35S::UBP12_3.2	18942	1738.34	7.46069
R1-35S-UBP12-homo-6.jpg	35S::UBP12_3.2	1775	162.895	5.0931
R1-35S-UBP12-homo-6.jpg	35S::UBP12_3.2	3450.5	316.658	5.75782
R1-35S-UBP12-homo-6.jpg	35S::UBP12_3.2	2703.5	248.105	5.51385
R1-35S-UBP12-homo-6.jpg	35S::UBP12_3.2	4652	426.922	6.0566
R1-35S-UBP12-homo-6.jpg	35S::UBP12_3.2	9662	886.699	6.78751
R1-35S-UBP12-homo-6.jpg	35S::UBP12_3.2	3737.5	342.997	5.83772
R1-35S-UBP12-homo-6.jpg	35S::UBP12_3.2	30622	2810.23	7.94102
R1-35S-UBP12-homo-6.jpg	35S::UBP12_3.2	761	69.8383	4.24618
R1-35S-UBP12-homo-6.jpg	35S::UBP12_3.2	8575	786.943	6.66816
R1-35S-UBP12-homo-6.jpg	35S::UBP12_3.2	18803	1725.58	7.45332
R1-35S-UBP12-homo-6.jpg	35S::UBP12_3.2	1132	103.886	4.64329
R1-35S-UBP12-homo-6.jpg	35S::UBP12_3.2	18996.5	1743.34	7.46356
R1-35S-UBP12-homo-6.jpg	35S::UBP12_3.2	584.5	53.6406	3.98231
R1-35S-UBP12-homo-6.jpg	35S::UBP12_3.2	594	54.5124	3.99843
R1-35S-UBP12-homo-6.jpg	35S::UBP12_3.2	4578	420.131	6.04057
R1-35S-UBP12-homo-6.jpg	35S::UBP12_3.2	17922.5	1644.78	7.40536
R1-35S-UBP12-homo-6.jpg	35S::UBP12_3.2	765.5	70.2513	4.25208
R1-35S-UBP12-homo-6.jpg	35S::UBP12_3.2	4695.5	430.914	6.06591
R1-35S-UBP12-homo-6.jpg	35S::UBP12_3.2	6693.5	614.274	6.42044
R1-35S-UBP12-homo-6.jpg	35S::UBP12_3.2	3877	355.799	5.87437
R1-35S-UBP12-homo-6.jpg	35S::UBP12_3.2	1294	118.753	4.77704
R1-35S-UBP12-homo-6.jpg	35S::UBP12_3.2	2129.5	195.428	5.27519
R1-35S-UBP12-homo-6.jpg	35S::UBP12_3.2	9809	900.189	6.8026
R1-35S-UBP12-homo-6.jpg	35S::UBP12_3.2	1507.5	138.346	4.92976
R1-35S-UBP12-homo-6.jpg	35S::UBP12_3.2	1990	182.626	5.20744
R1-35S-UBP12-homo-6.jpg	35S::UBP12_3.2	1565	143.623	4.96719
R1-35S-UBP12-homo-6.jpg	35S::UBP12_3.2	14562.5	1336.43	7.19775
R1-35S-UBP12-homo-6.jpg	35S::UBP12_3.2	336.5	30.8812	3.43015
R1-35S-UBP12-homo-6.jpg	35S::UBP12_3.2	11774.5	1080.57	6.98524
R1-35S-UBP12-homo-6.jpg	35S::UBP12_3.2	446	40.9302	3.71187
R1-35S-UBP12-homo-6.jpg	35S::UBP12_3.2	24162	2217.39	7.70409
R1-35S-UBP12-homo-6.jpg	35S::UBP12_3.2	2501	229.521	5.436
R1-35S-UBP12-homo-6.jpg	35S::UBP12_3.2	16979.5	1558.24	7.35131
R1-35S-UBP12-homo-6.jpg	35S::UBP12_3.2	20326	1865.35	7.53121
R1-35S-UBP12-homo-6.jpg	35S::UBP12_3.2	18094	1660.52	7.41488
R1-35S-UBP12-homo-6.jpg	35S::UBP12_3.2	6491	595.69	6.38972
R1-35S-UBP12-homo-6.jpg	35S::UBP12_3.2	474	43.4998	3.77276
R1-35S-UBP12-homo-6.jpg	35S::UBP12_3.2	1058	97.0945	4.57568
R1-35S-UBP12-homo-6.jpg	35S::UBP12_3.2	631	57.908	4.05885
R1-35S-UBP12-homo-6.jpg	35S::UBP12_3.2	3659	335.793	5.81649
R1-35S-UBP12-homo-6.jpg	35S::UBP12_3.2	401.5	36.8464	3.60676
R1-35S-UBP12-homo-6.jpg	35S::UBP12_3.2	589	54.0536	3.98998
R1-35S-UBP12-homo-6.jpg	35S::UBP12_3.2	41803	3836.33	8.25227
R1-35S-UBP12-homo-6.jpg	35S::UBP12_3.2	1577.5	144.77	4.97515
R1-35S-UBP12-homo-6.jpg	35S::UBP12_3.2	839	76.9965	4.34376
R1-35S-UBP12-homo-6.jpg	35S::UBP12_3.2	31253.5	2868.19	7.96144
R1-35S-UBP12-homo-6.jpg	35S::UBP12_3.2	963	88.3762	4.4816
R1-35S-UBP12-homo-6.jpg	35S::UBP12_3.2	10116.5	928.409	6.83347
R1-35S-UBP12-homo-6.jpg	35S::UBP12_3.2	7636.5	700.815	6.55224
R1-35S-UBP12-homo-6.jpg	35S::UBP12_3.2	2004.5	183.956	5.2147
R1-35S-UBP12-homo-6.jpg	35S::UBP12_3.2	1498	137.474	4.92344
R1-35S-UBP12-homo-6.jpg	35S::UBP12_3.2	4928.5	452.297	6.11434
R1-35S-UBP12-homo-6.jpg	35S::UBP12_3.2	24295	2229.59	7.70957
R1-35S-UBP12-homo-6.jpg	35S::UBP12_3.2	26251.5	2409.15	7.78703
R1-35S-UBP12-homo-6.jpg	35S::UBP12_3.2	7603.5	697.786	6.54791
R1-35S-UBP12-homo-6.jpg	35S::UBP12_3.2	6233.5	572.059	6.34924
R1-35S-UBP12-homo-6.jpg	35S::UBP12_3.2	1286.5	118.064	4.77123
R1-35S-UBP12-homo-6.jpg	35S::UBP12_3.2	21062.5	1932.94	7.5668
R1-35S-UBP12-homo-6.jpg	35S::UBP12_3.2	7163.5	657.407	6.4883
R1-35S-UBP12-homo-6.jpg	35S::UBP12_3.2	1374.5	126.14	4.83739
R1-35S-UBP12-homo-6.jpg	35S::UBP12_3.2	16559	1519.65	7.32623
R1-35S-UBP12-homo-6.jpg	35S::UBP12_3.2	4922	451.7	6.11302
R1-35S-UBP12-homo-6.jpg	35S::UBP12_3.2	1221	112.053	4.71897
R1-35S-UBP12-homo-6.jpg	35S::UBP12_3.2	7922	727.016	6.58895
R1-35S-UBP12-homo-6.jpg	35S::UBP12_3.2	31884	2926.05	7.98141
R1-35S-UBP12-homo-8.jpg	35S::UBP12_3.2	22475.5	2062.62	7.63173
R1-35S-UBP12-homo-8.jpg	35S::UBP12_3.2	3317	304.407	5.71837
R1-35S-UBP12-homo-8.jpg	35S::UBP12_3.2	14551	1335.37	7.19696
R1-35S-UBP12-homo-8.jpg	35S::UBP12_3.2	24084	2210.23	7.70085
R1-35S-UBP12-homo-8.jpg	35S::UBP12_3.2	33381.5	3063.48	8.02731
R1-35S-UBP12-homo-8.jpg	35S::UBP12_3.2	24525	2250.7	7.719
R1-35S-UBP12-homo-8.jpg	35S::UBP12_3.2	7039	645.981	6.47077
R1-35S-UBP12-homo-8.jpg	35S::UBP12_3.2	12526.5	1149.58	7.04715
R1-35S-UBP12-homo-8.jpg	35S::UBP12_3.2	1296	118.936	4.77859
R1-35S-UBP12-homo-8.jpg	35S::UBP12_3.2	220	20.1898	3.00518
R1-35S-UBP12-homo-8.jpg	35S::UBP12_3.2	815.5	74.8399	4.31535
R1-35S-UBP12-homo-8.jpg	35S::UBP12_3.2	186	17.0695	2.8373
R1-35S-UBP12-homo-8.jpg	35S::UBP12_3.2	2864	262.834	5.57152
R1-35S-UBP12-homo-8.jpg	35S::UBP12_3.2	6135.5	563.065	6.3334
R1-35S-UBP12-homo-8.jpg	35S::UBP12_3.2	8665.5	795.248	6.67865
R1-35S-UBP12-homo-8.jpg	35S::UBP12_3.2	16750.5	1537.22	7.33773
R1-35S-UBP12-homo-8.jpg	35S::UBP12_3.2	4153	381.128	5.94314
R1-35S-UBP12-homo-8.jpg	35S::UBP12_3.2	12833	1177.71	7.07132
R1-35S-UBP12-homo-8.jpg	35S::UBP12_3.2	386.5	35.4698	3.56868
R1-35S-UBP12-homo-8.jpg	35S::UBP12_3.2	18984	1742.19	7.4629
R1-35S-UBP12-homo-8.jpg	35S::UBP12_3.2	2071.5	190.105	5.24758
R1-35S-UBP12-homo-8.jpg	35S::UBP12_3.2	7928	727.566	6.58971
R1-35S-UBP12-homo-8.jpg	35S::UBP12_3.2	36021.5	3305.76	8.10342
R1-35S-UBP12-homo-8.jpg	35S::UBP12_3.2	3960	363.416	5.89555
R1-35S-UBP12-homo-8.jpg	35S::UBP12_3.2	20792.5	1908.16	7.5539
R1-35S-UBP12-homo-8.jpg	35S::UBP12_3.2	15222	1396.95	7.24205
R1-35S-UBP12-homo-8.jpg	35S::UBP12_3.2	5495.5	504.332	6.22323
R1-35S-UBP12-homo-8.jpg	35S::UBP12_3.2	715.5	65.6627	4.18453
R1-35S-UBP12-homo-8.jpg	35S::UBP12_3.2	7864.5	721.739	6.58166
R1-35S-UBP12-homo-8.jpg	35S::UBP12_3.2	4680	429.492	6.0626
R1-35S-UBP12-homo-8.jpg	35S::UBP12_3.2	25319	2323.57	7.75086
R1-35S-UBP12-homo-8.jpg	35S::UBP12_3.2	12257.5	1124.89	7.02544
R1-35S-UBP12-homo-8.jpg	35S::UBP12_3.2	29304	2689.28	7.89703
R1-35S-UBP12-homo-8.jpg	35S::UBP12_3.2	169.5	15.5553	2.7444
R1-35S-UBP12-homo-8.jpg	35S::UBP12_3.2	269	24.6866	3.20626
R1-35S-UBP12-homo-8.jpg	35S::UBP12_3.2	5090	467.118	6.14658
R1-35S-UBP12-homo-8.jpg	35S::UBP12_3.2	44637.5	4096.46	8.31788
R1-35S-UBP12-homo-8.jpg	35S::UBP12_3.2	1188.5	109.071	4.692
R1-35S-UBP12-homo-8.jpg	35S::UBP12_3.2	15240	1398.6	7.24323
R1-35S-UBP12-homo-8.jpg	35S::UBP12_3.2	6059	556.045	6.32085
R1-35S-UBP12-homo-8.jpg	35S::UBP12_3.2	388.5	35.6533	3.57384
R1-35S-UBP12-homo-8.jpg	35S::UBP12_3.2	464.5	42.628	3.75251
R1-35S-UBP12-homo-8.jpg	35S::UBP12_3.2	18387	1687.41	7.43095
R1-35S-UBP12-homo-8.jpg	35S::UBP12_3.2	11377	1044.09	6.9509
R1-35S-UBP12-homo-8.jpg	35S::UBP12_3.2	244	22.3923	3.10872
R1-35S-UBP12-homo-8.jpg	35S::UBP12_3.2	25680	2356.7	7.76502
R1-35S-UBP12-homo-8.jpg	35S::UBP12_3.2	1997	183.268	5.21095
R1-35S-UBP12-homo-8.jpg	35S::UBP12_3.2	2939	269.717	5.59737
R1-35S-UBP12-homo-8.jpg	35S::UBP12_3.2	877.5	80.5297	4.38863
R1-35S-UBP12-homo-8.jpg	35S::UBP12_3.2	3330	305.6	5.72228
R1-35S-UBP12-homo-8.jpg	35S::UBP12_3.2	26292.5	2412.91	7.78859
R1-35S-UBP12-homo-8.jpg	35S::UBP12_3.2	5508.5	505.525	6.2256
R1-35S-UBP12-homo-8.jpg	35S::UBP12_3.2	11333.5	1040.09	6.94707
R1-35S-UBP12-homo-8.jpg	35S::UBP12_3.2	5870	538.7	6.28916
R1-35S-UBP12-homo-8.jpg	35S::UBP12_3.2	26458	2428.1	7.79486
R1-35S-UBP12-homo-8.jpg	35S::UBP12_3.2	7641	701.228	6.55283
R1-35S-UBP12-homo-8.jpg	35S::UBP12_3.2	1783	163.629	5.0976
R1-35S-UBP12-homo-8.jpg	35S::UBP12_3.2	11313	1038.21	6.94526
R1-35S-UBP12-homo-8.jpg	35S::UBP12_3.2	20614.5	1891.83	7.5453
R1-35S-UBP12-homo-8.jpg	35S::UBP12_3.2	26423.5	2424.93	7.79356
R1-35S-UBP12-homo-8.jpg	35S::UBP12_3.2	5432.5	498.55	6.2117
R1-35S-UBP12-homo-8.jpg	35S::UBP12_3.2	13839	1270.03	7.1468
R1-35S-UBP12-homo-8.jpg	35S::UBP12_3.2	47808.5	4387.47	8.38651
R1-35S-UBP12-homo-8.jpg	35S::UBP12_3.2	16728	1535.16	7.33639
R1-35S-UBP12-homo-8.jpg	35S::UBP12_3.2	11090.5	1017.79	6.92539
R1-35S-UBP12-homo-8.jpg	35S::UBP12_3.2	1856.5	170.374	5.138
R1-35S-UBP12-homo-8.jpg	35S::UBP12_3.2	19087	1751.65	7.46831
R1-35S-UBP12-homo-8.jpg	35S::UBP12_3.2	6254.5	573.986	6.35261
R1-35S-UBP12-homo-8.jpg	35S::UBP12_3.2	3651.5	335.104	5.81444
R1-35S-UBP12-homo-8.jpg	35S::UBP12_3.2	6973	639.924	6.46135
R1-35S-UBP12-homo-8.jpg	35S::UBP12_3.2	25610	2350.27	7.76229
R1-35S-UBP12-homo-8.jpg	35S::UBP12_3.2	44151.5	4051.86	8.30693
R1-35S-UBP12-homo-8.jpg	35S::UBP12_3.2	13845	1270.58	7.14723
R1-35S-UBP12-homo-8.jpg	35S::UBP12_3.2	6541.5	600.325	6.39747
R1-35S-UBP12-homo-8.jpg	35S::UBP12_3.2	17228	1581.04	7.36584
R1-35S-UBP12-homo-8.jpg	35S::UBP12_3.2	9706	890.736	6.79205
R1-35S-UBP12-homo-8.jpg	35S::UBP12_3.2	8022	736.193	6.60149
R1-35S-UBP12-homo-8.jpg	35S::UBP12_3.2	356.5	32.7166	3.48788
R1-35S-UBP12-homo-8.jpg	35S::UBP12_3.2	318	29.1834	3.3736
R1-35S-UBP12-homo-8.jpg	35S::UBP12_3.2	13792	1265.72	7.14339
R1-35S-UBP12-homo-8.jpg	35S::UBP12_3.2	15294	1403.56	7.24676
R1-35S-UBP12-homo-8.jpg	35S::UBP12_3.2	21950.5	2014.44	7.60809
R1-35S-UBP12-homo-8.jpg	35S::UBP12_3.2	3201.5	293.807	5.68292
R1-35S-UBP12-homo-8.jpg	35S::UBP12_3.2	14934	1370.52	7.22294
R1-35S-UBP12-homo-8.jpg	35S::UBP12_3.2	14597	1339.59	7.20012
R1-35S-UBP12-homo-8.jpg	35S::UBP12_3.2	3911.5	358.965	5.88323
R1-35S-UBP12-homo-8.jpg	35S::UBP12_3.2	2072.5	190.197	5.24806
R1-35S-UBP12-homo-8.jpg	35S::UBP12_3.2	3830	351.486	5.86217
R1-35S-UBP12-homo-8.jpg	35S::UBP12_3.2	3860.5	354.285	5.8701
R1-35S-UBP12-homo-8.jpg	35S::UBP12_3.2	13187.5	1210.24	7.09857
R1-35S-UBP12-homo-8.jpg	35S::UBP12_3.2	14767.5	1355.24	7.21173
R1-35S-UBP12-homo-8.jpg	35S::UBP12_3.2	22365.5	2052.52	7.62682
R1-35S-UBP12-homo-8.jpg	35S::UBP12_3.2	7037	645.798	6.47049
R1-35S-UBP12-homo-8.jpg	35S::UBP12_3.2	1778.5	163.216	5.09507
R1-35S-UBP12-homo-8.jpg	35S::UBP12_3.2	1731	158.857	5.068
R1-35S-UBP12-homo-8.jpg	35S::UBP12_3.2	36981	3393.81	8.12971
R1-35S-UBP12-homo-8.jpg	35S::UBP12_3.2	2697	247.508	5.51144
R1-35S-UBP12-homo-8.jpg	35S::UBP12_3.2	980	89.9363	4.4991
R1-35S-UBP12-homo-8.jpg	35S::UBP12_3.2	17042	1563.97	7.35499
R1-35S-UBP12-homo-8.jpg	35S::UBP12_3.2	27015	2479.21	7.8157
R1-35S-UBP12-homo-8.jpg	35S::UBP12_3.2	16603	1523.69	7.32889
R1-35S-UBP12-homo-8.jpg	35S::UBP12_3.2	1814	166.474	5.11484
R1-35S-UBP12-homo-8.jpg	35S::UBP12_3.2	2428.5	222.868	5.40658
R1-35S-UBP12-homo-8.jpg	35S::UBP12_3.2	4130	379.017	5.93758
R1-35S-UBP12-homo-8.jpg	35S::UBP12_3.2	21915	2011.18	7.60648
R1-35S-UBP12-homo-8.jpg	35S::UBP12_3.2	4362	400.308	5.99224
R1-35S-UBP12-homo-8.jpg	35S::UBP12_3.2	6620.5	607.575	6.40948
R1-35S-UBP12-homo-8.jpg	35S::UBP12_3.2	19473	1787.07	7.48833
R1-35S-UBP12-homo-8.jpg	35S::UBP12_3.2	23741	2178.75	7.68651
R2-35S-UBP12-homo-2.jpg	35S::UBP12_3.2	1349	123.8	4.81867
R2-35S-UBP12-homo-2.jpg	35S::UBP12_3.2	2166	198.778	5.29219
R2-35S-UBP12-homo-2.jpg	35S::UBP12_3.2	374	34.3226	3.5358
R2-35S-UBP12-homo-2.jpg	35S::UBP12_3.2	501	45.9776	3.82816
R2-35S-UBP12-homo-2.jpg	35S::UBP12_3.2	263	24.136	3.1837
R2-35S-UBP12-homo-2.jpg	35S::UBP12_3.2	4086.5	375.025	5.92699
R2-35S-UBP12-homo-2.jpg	35S::UBP12_3.2	817	74.9775	4.31719
R2-35S-UBP12-homo-2.jpg	35S::UBP12_3.2	285	26.1549	3.26404
R2-35S-UBP12-homo-2.jpg	35S::UBP12_3.2	2339	214.654	5.36903
R2-35S-UBP12-homo-2.jpg	35S::UBP12_3.2	2513.5	230.668	5.44098
R2-35S-UBP12-homo-2.jpg	35S::UBP12_3.2	4298	394.435	5.97745
R2-35S-UBP12-homo-2.jpg	35S::UBP12_3.2	20791	1908.03	7.55382
R2-35S-UBP12-homo-2.jpg	35S::UBP12_3.2	23510.5	2157.6	7.67675
R2-35S-UBP12-homo-2.jpg	35S::UBP12_3.2	2465	226.217	5.4215
R2-35S-UBP12-homo-2.jpg	35S::UBP12_3.2	6854.5	629.049	6.44421
R2-35S-UBP12-homo-2.jpg	35S::UBP12_3.2	4581	420.406	6.04122
R2-35S-UBP12-homo-2.jpg	35S::UBP12_3.2	14664.5	1345.79	7.20473
R2-35S-UBP12-homo-2.jpg	35S::UBP12_3.2	3655.5	335.472	5.81554
R2-35S-UBP12-homo-2.jpg	35S::UBP12_3.2	15880	1457.34	7.28436
R2-35S-UBP12-homo-2.jpg	35S::UBP12_3.2	16430	1507.81	7.31841
R2-35S-UBP12-homo-2.jpg	35S::UBP12_3.2	9203.5	844.621	6.73889
R2-35S-UBP12-homo-2.jpg	35S::UBP12_3.2	2434	223.372	5.40884
R2-35S-UBP12-homo-2.jpg	35S::UBP12_3.2	22172	2034.76	7.61813
R2-35S-UBP12-homo-2.jpg	35S::UBP12_3.2	9624.5	883.257	6.78362
R2-35S-UBP12-homo-2.jpg	35S::UBP12_3.2	2489.5	228.466	5.43139
R2-35S-UBP12-homo-2.jpg	35S::UBP12_3.2	2867.5	263.155	5.57274
R2-35S-UBP12-homo-2.jpg	35S::UBP12_3.2	12423	1140.08	7.03885
R2-35S-UBP12-homo-2.jpg	35S::UBP12_3.2	6239.5	572.61	6.3502
R2-35S-UBP12-homo-2.jpg	35S::UBP12_3.2	36199.5	3322.09	8.10835
R2-35S-UBP12-homo-2.jpg	35S::UBP12_3.2	15959	1464.59	7.28933
R2-35S-UBP12-homo-2.jpg	35S::UBP12_3.2	22991.5	2109.97	7.65443
R2-35S-UBP12-homo-2.jpg	35S::UBP12_3.2	2887	264.945	5.57952
R2-35S-UBP12-homo-2.jpg	35S::UBP12_3.2	9479.5	869.95	6.76844
R2-35S-UBP12-homo-2.jpg	35S::UBP12_3.2	1097	100.674	4.61188
R2-35S-UBP12-homo-2.jpg	35S::UBP12_3.2	1623.5	148.991	5.00389
R2-35S-UBP12-homo-2.jpg	35S::UBP12_3.2	2416.5	221.766	5.40162
R2-35S-UBP12-homo-2.jpg	35S::UBP12_3.2	10734	985.078	6.89272
R2-35S-UBP12-homo-2.jpg	35S::UBP12_3.2	15059.5	1382.04	7.23131
R2-35S-UBP12-homo-2.jpg	35S::UBP12_3.2	3852.5	353.551	5.86803
R2-35S-UBP12-homo-2.jpg	35S::UBP12_3.2	16805	1542.22	7.34098
R2-35S-UBP12-homo-2.jpg	35S::UBP12_3.2	3497	320.926	5.77121
R2-35S-UBP12-homo-2.jpg	35S::UBP12_3.2	2907	266.78	5.58643
R2-35S-UBP12-homo-2.jpg	35S::UBP12_3.2	11761.5	1079.37	6.98414
R2-35S-UBP12-homo-2.jpg	35S::UBP12_3.2	1320	121.139	4.79694
R2-35S-UBP12-homo-2.jpg	35S::UBP12_3.2	22542	2068.72	7.63468
R2-35S-UBP12-homo-2.jpg	35S::UBP12_3.2	5395	495.109	6.20478
R2-35S-UBP12-homo-2.jpg	35S::UBP12_3.2	6428.5	589.955	6.38005
R2-35S-UBP12-homo-2.jpg	35S::UBP12_3.2	4774.5	438.164	6.08259
R2-35S-UBP12-homo-2.jpg	35S::UBP12_3.2	19008	1744.4	7.46416
R2-35S-UBP12-homo-2.jpg	35S::UBP12_3.2	6967	639.374	6.46049
R2-35S-UBP12-homo-2.jpg	35S::UBP12_3.2	10562.5	969.339	6.87661
R2-35S-UBP12-homo-2.jpg	35S::UBP12_3.2	19513	1790.74	7.49039
R2-35S-UBP12-homo-2.jpg	35S::UBP12_3.2	9339.5	857.102	6.75356
R2-35S-UBP12-homo-2.jpg	35S::UBP12_3.2	1091.5	100.169	4.60686
R2-35S-UBP12-homo-2.jpg	35S::UBP12_3.2	568	52.1263	3.95367
R2-35S-UBP12-homo-2.jpg	35S::UBP12_3.2	46060.5	4227.05	8.34926
R2-35S-UBP12-homo-2.jpg	35S::UBP12_3.2	8331.5	764.596	6.63935
R2-35S-UBP12-homo-2.jpg	35S::UBP12_3.2	1792	164.455	5.10264
R2-35S-UBP12-homo-2.jpg	35S::UBP12_3.2	2063	189.325	5.24347
R2-35S-UBP12-homo-2.jpg	35S::UBP12_3.2	185	16.9778	2.8319
R2-35S-UBP12-homo-2.jpg	35S::UBP12_3.2	20698	1899.49	7.54934
R2-35S-UBP12-homo-2.jpg	35S::UBP12_3.2	1502	137.841	4.9261
R2-35S-UBP12-homo-2.jpg	35S::UBP12_3.2	6818	625.7	6.43887
R2-35S-UBP12-homo-2.jpg	35S::UBP12_3.2	1567	143.806	4.96847
R2-35S-UBP12-homo-2.jpg	35S::UBP12_3.2	29397	2697.81	7.9002
R2-35S-UBP12-homo-2.jpg	35S::UBP12_3.2	16292	1495.15	7.30998
R2-35S-UBP12-homo-2.jpg	35S::UBP12_3.2	2757	253.015	5.53345
R2-35S-UBP12-homo-2.jpg	35S::UBP12_3.2	509	46.7118	3.844
R2-35S-UBP12-homo-2.jpg	35S::UBP12_3.2	3323	304.957	5.72017
R2-35S-UBP12-homo-2.jpg	35S::UBP12_3.2	540.5	49.6026	3.90404
R2-35S-UBP12-homo-2.jpg	35S::UBP12_3.2	5350	490.979	6.1964
R2-35S-UBP12-homo-2.jpg	35S::UBP12_3.2	2046.5	187.811	5.23544
R2-35S-UBP12-homo-2.jpg	35S::UBP12_3.2	8470.5	777.352	6.65589
R2-35S-UBP12-homo-2.jpg	35S::UBP12_3.2	35947	3298.92	8.10135
R2-35S-UBP12-homo-2.jpg	35S::UBP12_3.2	5088.5	466.98	6.14629
R2-35S-UBP12-homo-2.jpg	35S::UBP12_3.2	6795	623.589	6.43549
R2-35S-UBP12-homo-2.jpg	35S::UBP12_3.2	697	63.9649	4.15833
R2-35S-UBP12-homo-2.jpg	35S::UBP12_3.2	379.5	34.8274	3.5504
R2-35S-UBP12-homo-2.jpg	35S::UBP12_3.2	867.5	79.612	4.37716
R2-35S-UBP12-homo-2.jpg	35S::UBP12_3.2	17079	1567.37	7.35715
R2-35S-UBP12-homo-2.jpg	35S::UBP12_3.2	19582.5	1797.12	7.49394
R2-35S-UBP12-homo-2.jpg	35S::UBP12_3.2	10626.5	975.212	6.88266
R2-35S-UBP12-homo-2.jpg	35S::UBP12_3.2	5515.5	506.167	6.22687
R2-35S-UBP12-homo-2.jpg	35S::UBP12_3.2	7525.5	690.628	6.5376
R2-35S-UBP12-homo-2.jpg	35S::UBP12_3.2	5893.5	540.857	6.29315
R2-35S-UBP12-homo-2.jpg	35S::UBP12_3.2	1703	156.287	5.0517
R2-35S-UBP12-homo-2.jpg	35S::UBP12_3.2	10701.5	982.095	6.88969
R2-35S-UBP12-homo-2.jpg	35S::UBP12_3.2	4995	458.4	6.12774
R2-35S-UBP12-homo-2.jpg	35S::UBP12_3.2	207	18.9967	2.94427
R2-35S-UBP12-homo-2.jpg	35S::UBP12_3.2	3320	304.682	5.71927
R2-35S-UBP12-homo-2.jpg	35S::UBP12_3.2	19961.5	1831.9	7.51311
R2-35S-UBP12-homo-2.jpg	35S::UBP12_3.2	1681	154.268	5.03869
R2-35S-UBP12-homo-2.jpg	35S::UBP12_3.2	2354	216.031	5.37542
R2-35S-UBP12-homo-2.jpg	35S::UBP12_3.2	1007	92.4141	4.52628
R2-35S-UBP12-homo-2.jpg	35S::UBP12_3.2	796	73.0503	4.29115
R2-35S-UBP12-homo-2.jpg	35S::UBP12_3.2	1458.5	133.849	4.89671
R2-35S-UBP12-homo-2.jpg	35S::UBP12_3.2	7253.5	665.666	6.50079
R2-35S-UBP12-homo-2.jpg	35S::UBP12_3.2	1007.5	92.46	4.52678
R2-35S-UBP12-homo-2.jpg	35S::UBP12_3.2	2079	190.793	5.25119
R2-35S-UBP12-homo-2.jpg	35S::UBP12_3.2	18350	1684.01	7.42893
R2-35S-UBP12-homo-2.jpg	35S::UBP12_3.2	5779.5	530.395	6.27362
R2-35S-UBP12-homo-2.jpg	35S::UBP12_3.2	7363	675.715	6.51577
R2-35S-UBP12-homo-2.jpg	35S::UBP12_3.2	41940	3848.91	8.25554
R2-35S-UBP12-homo-2.jpg	35S::UBP12_3.2	13217.5	1212.99	7.10085
R2-35S-UBP12-homo-2.jpg	35S::UBP12_3.2	21563.5	1978.92	7.59031
R2-35S-UBP12-homo-2.jpg	35S::UBP12_3.2	40903	3753.74	8.23051
R2-35S-UBP12-homo-2.jpg	35S::UBP12_3.2	2140.5	196.437	5.28034
R2-35S-UBP12-homo-2.jpg	35S::UBP12_3.2	17202	1578.66	7.36433
R2-35S-UBP12-homo-2.jpg	35S::UBP12_3.2	5589	512.912	6.2401
R2-35S-UBP12-homo-2.jpg	35S::UBP12_3.2	21699.5	1991.4	7.59659
R2-35S-UBP12-homo-2.jpg	35S::UBP12_3.2	4976.5	456.702	6.12403
R2-35S-UBP12-homo-2.jpg	35S::UBP12_3.2	625	57.3573	4.0493
R2-35S-UBP12-homo-2.jpg	35S::UBP12_3.2	14110	1294.9	7.16619
R2-35S-UBP12-homo-2.jpg	35S::UBP12_3.2	2740	251.455	5.52726
R2-35S-UBP12-homo-2.jpg	35S::UBP12_3.2	817.5	75.0234	4.3178
R2-35S-UBP12-homo-2.jpg	35S::UBP12_3.2	9229	846.961	6.74166
R2-35S-UBP12-homo-2.jpg	35S::UBP12_3.2	17824	1635.74	7.39985
R2-35S-UBP12-homo-2.jpg	35S::UBP12_3.2	9899.5	908.494	6.81179
R2-35S-UBP12-homo-2.jpg	35S::UBP12_3.2	30782	2824.92	7.94623
R2-35S-UBP12-homo-2.jpg	35S::UBP12_3.2	32061	2942.29	7.98694
R2-35S-UBP12-homo-2.jpg	35S::UBP12_3.2	31507	2891.45	7.96951
R2-35S-UBP12-homo-3.jpg	35S::UBP12_3.2	1003	92.0471	4.5223
R2-35S-UBP12-homo-3.jpg	35S::UBP12_3.2	2272.5	208.551	5.34018
R2-35S-UBP12-homo-3.jpg	35S::UBP12_3.2	396.5	36.3875	3.59423
R2-35S-UBP12-homo-3.jpg	35S::UBP12_3.2	2724.5	250.032	5.52159
R2-35S-UBP12-homo-3.jpg	35S::UBP12_3.2	721	66.1674	4.19219
R2-35S-UBP12-homo-3.jpg	35S::UBP12_3.2	2295.5	210.662	5.35026
R2-35S-UBP12-homo-3.jpg	35S::UBP12_3.2	956	87.7338	4.47431
R2-35S-UBP12-homo-3.jpg	35S::UBP12_3.2	4221.5	387.414	5.95949
R2-35S-UBP12-homo-3.jpg	35S::UBP12_3.2	2908	266.872	5.58677
R2-35S-UBP12-homo-3.jpg	35S::UBP12_3.2	1761	161.61	5.08519
R2-35S-UBP12-homo-3.jpg	35S::UBP12_3.2	5969.5	547.831	6.30597
R2-35S-UBP12-homo-3.jpg	35S::UBP12_3.2	7336	673.237	6.5121
R2-35S-UBP12-homo-3.jpg	35S::UBP12_3.2	48111	4415.23	8.39282
R2-35S-UBP12-homo-3.jpg	35S::UBP12_3.2	6739	618.45	6.42722
R2-35S-UBP12-homo-3.jpg	35S::UBP12_3.2	10163.5	932.722	6.83811
R2-35S-UBP12-homo-3.jpg	35S::UBP12_3.2	3361	308.445	5.73154
R2-35S-UBP12-homo-3.jpg	35S::UBP12_3.2	4247	389.755	5.96552
R2-35S-UBP12-homo-3.jpg	35S::UBP12_3.2	15797	1449.72	7.27912
R2-35S-UBP12-homo-3.jpg	35S::UBP12_3.2	8073.5	740.919	6.60789
R2-35S-UBP12-homo-3.jpg	35S::UBP12_3.2	2758.5	253.152	5.53399
R2-35S-UBP12-homo-3.jpg	35S::UBP12_3.2	3353	307.711	5.72916
R2-35S-UBP12-homo-3.jpg	35S::UBP12_3.2	3243	297.616	5.6958
R2-35S-UBP12-homo-3.jpg	35S::UBP12_3.2	25942.5	2380.79	7.77519
R2-35S-UBP12-homo-3.jpg	35S::UBP12_3.2	6482	594.864	6.38833
R2-35S-UBP12-homo-3.jpg	35S::UBP12_3.2	270	24.7784	3.20997
R2-35S-UBP12-homo-3.jpg	35S::UBP12_3.2	1185.5	108.795	4.68947
R2-35S-UBP12-homo-3.jpg	35S::UBP12_3.2	14354	1317.29	7.18333
R2-35S-UBP12-homo-3.jpg	35S::UBP12_3.2	255.5	23.4477	3.15477
R2-35S-UBP12-homo-3.jpg	35S::UBP12_3.2	6803.5	624.369	6.43674
R2-35S-UBP12-homo-3.jpg	35S::UBP12_3.2	9134	838.243	6.73131
R2-35S-UBP12-homo-3.jpg	35S::UBP12_3.2	35649.5	3271.62	8.09304
R2-35S-UBP12-homo-3.jpg	35S::UBP12_3.2	3627.5	332.902	5.80785
R2-35S-UBP12-homo-3.jpg	35S::UBP12_3.2	1638	150.322	5.01278
R2-35S-UBP12-homo-3.jpg	35S::UBP12_3.2	3547.5	325.56	5.78555
R2-35S-UBP12-homo-3.jpg	35S::UBP12_3.2	21003	1927.48	7.56397
R2-35S-UBP12-homo-3.jpg	35S::UBP12_3.2	37001	3395.65	8.13025
R2-35S-UBP12-homo-3.jpg	35S::UBP12_3.2	8645.5	793.413	6.67634
R2-35S-UBP12-homo-3.jpg	35S::UBP12_3.2	5894	540.903	6.29324
R2-35S-UBP12-homo-3.jpg	35S::UBP12_3.2	636	58.3668	4.06675
R2-35S-UBP12-homo-3.jpg	35S::UBP12_3.2	31813	2919.53	7.97918
R2-35S-UBP12-homo-3.jpg	35S::UBP12_3.2	11735.5	1076.99	6.98192
R2-35S-UBP12-homo-3.jpg	35S::UBP12_3.2	18078.5	1659.1	7.41403
R2-35S-UBP12-homo-3.jpg	35S::UBP12_3.2	248	22.7594	3.12498
R2-35S-UBP12-homo-3.jpg	35S::UBP12_3.2	569	52.2181	3.95543
R2-35S-UBP12-homo-3.jpg	35S::UBP12_3.2	32774.5	3007.77	8.00896
R2-35S-UBP12-homo-3.jpg	35S::UBP12_3.2	13446.5	1234.01	7.11802
R2-35S-UBP12-homo-3.jpg	35S::UBP12_3.2	1372	125.911	4.83557
R2-35S-UBP12-homo-3.jpg	35S::UBP12_3.2	6331.5	581.053	6.36484
R2-35S-UBP12-homo-3.jpg	35S::UBP12_3.2	35542.5	3261.8	8.09003
R2-35S-UBP12-homo-3.jpg	35S::UBP12_3.2	1524.5	139.906	4.94097
R2-35S-UBP12-homo-3.jpg	35S::UBP12_3.2	3089	283.483	5.64715
R2-35S-UBP12-homo-3.jpg	35S::UBP12_3.2	11071	1016	6.92363
R2-35S-UBP12-homo-3.jpg	35S::UBP12_3.2	4028.5	369.702	5.9127
R2-35S-UBP12-homo-3.jpg	35S::UBP12_3.2	18339.5	1683.05	7.42836
R2-35S-UBP12-homo-3.jpg	35S::UBP12_3.2	5526.5	507.177	6.22886
R2-35S-UBP12-homo-3.jpg	35S::UBP12_3.2	31075.5	2851.85	7.95572
R2-35S-UBP12-homo-3.jpg	35S::UBP12_3.2	1294.5	118.799	4.77743
R2-35S-UBP12-homo-3.jpg	35S::UBP12_3.2	1385.5	127.15	4.84537
R2-35S-UBP12-homo-3.jpg	35S::UBP12_3.2	10928.5	1002.93	6.91068
R2-35S-UBP12-homo-3.jpg	35S::UBP12_3.2	1136	104.253	4.64682
R2-35S-UBP12-homo-3.jpg	35S::UBP12_3.2	10451.5	959.152	6.86605
R2-35S-UBP12-homo-3.jpg	35S::UBP12_3.2	1338.5	122.836	4.81085
R2-35S-UBP12-homo-3.jpg	35S::UBP12_3.2	7288	668.832	6.50553
R2-35S-UBP12-homo-3.jpg	35S::UBP12_3.2	27114.5	2488.34	7.81937
R2-35S-UBP12-homo-3.jpg	35S::UBP12_3.2	32554.5	2987.58	8.00222
R2-35S-UBP12-homo-3.jpg	35S::UBP12_3.2	21809.5	2001.5	7.60165
R2-35S-UBP12-homo-3.jpg	35S::UBP12_3.2	2239.5	205.523	5.32556
R2-35S-UBP12-homo-3.jpg	35S::UBP12_3.2	3947.5	362.269	5.89239
R2-35S-UBP12-homo-3.jpg	35S::UBP12_3.2	7295.5	669.521	6.50656
R2-35S-UBP12-homo-3.jpg	35S::UBP12_3.2	1629.5	149.542	5.00758
R2-35S-UBP12-homo-3.jpg	35S::UBP12_3.2	506	46.4365	3.83809
R2-35S-UBP12-homo-3.jpg	35S::UBP12_3.2	1033	94.8002	4.55177
R2-35S-UBP12-homo-3.jpg	35S::UBP12_3.2	16125.5	1479.87	7.29971
R2-35S-UBP12-homo-3.jpg	35S::UBP12_3.2	8196.5	752.207	6.62301
R2-35S-UBP12-homo-3.jpg	35S::UBP12_3.2	319	29.2752	3.37674
R2-35S-UBP12-homo-3.jpg	35S::UBP12_3.2	423.5	38.8653	3.6601
R2-35S-UBP12-homo-3.jpg	35S::UBP12_3.2	1485.5	136.327	4.91506
R2-35S-UBP12-homo-3.jpg	35S::UBP12_3.2	1609.5	147.707	4.99523
R2-35S-UBP12-homo-3.jpg	35S::UBP12_3.2	15548.5	1426.91	7.26327
R2-35S-UBP12-homo-3.jpg	35S::UBP12_3.2	2391.5	219.472	5.39123
R2-35S-UBP12-homo-3.jpg	35S::UBP12_3.2	2462.5	225.988	5.42048
R2-35S-UBP12-homo-3.jpg	35S::UBP12_3.2	67138.5	6161.42	8.72606
R2-35S-UBP12-homo-3.jpg	35S::UBP12_3.2	1184.5	108.704	4.68863
R2-35S-UBP12-homo-3.jpg	35S::UBP12_3.2	22892	2100.84	7.65009
R2-35S-UBP12-homo-3.jpg	35S::UBP12_3.2	3435.5	315.282	5.75347
R2-35S-UBP12-homo-3.jpg	35S::UBP12_3.2	14849	1362.72	7.21724
R2-35S-UBP12-homo-3.jpg	35S::UBP12_3.2	25172	2310.08	7.74504
R2-35S-UBP12-homo-3.jpg	35S::UBP12_3.2	7494	687.737	6.53341
R2-35S-UBP12-homo-3.jpg	35S::UBP12_3.2	5240	480.884	6.17563
R2-35S-UBP12-homo-3.jpg	35S::UBP12_3.2	2501	229.521	5.436
R2-35S-UBP12-homo-3.jpg	35S::UBP12_3.2	6684	613.402	6.41902
R2-35S-UBP12-homo-3.jpg	35S::UBP12_3.2	8685.5	797.083	6.68096
R2-35S-UBP12-homo-3.jpg	35S::UBP12_3.2	1437.5	131.922	4.88221
R2-35S-UBP12-homo-3.jpg	35S::UBP12_3.2	9090.5	834.251	6.72653
R2-35S-UBP12-homo-3.jpg	35S::UBP12_3.2	5588	512.82	6.23993
R2-35S-UBP12-homo-3.jpg	35S::UBP12_3.2	3536	324.505	5.7823
R2-35S-UBP12-homo-3.jpg	35S::UBP12_3.2	28920	2654.04	7.88384
R2-35S-UBP12-homo-3.jpg	35S::UBP12_3.2	4959.5	455.142	6.12061
R2-35S-UBP12-homo-3.jpg	35S::UBP12_3.2	23257	2134.34	7.66591
R2-35S-UBP12-homo-3.jpg	35S::UBP12_3.2	1027	94.2496	4.54595
R2-35S-UBP12-homo-3.jpg	35S::UBP12_3.2	421.5	38.6818	3.65537
R2-35S-UBP12-homo-3.jpg	35S::UBP12_3.2	190	17.4366	2.85857
R2-35S-UBP12-homo-3.jpg	35S::UBP12_3.2	32415	2974.78	7.99793
R2-35S-UBP12-homo-3.jpg	35S::UBP12_3.2	4333.5	397.693	5.98568
R2-35S-UBP12-homo-3.jpg	35S::UBP12_3.2	1343	123.249	4.81421
R2-35S-UBP12-homo-3.jpg	35S::UBP12_3.2	2769.5	254.162	5.53797
R2-35S-UBP12-homo-3.jpg	35S::UBP12_3.2	1958	179.689	5.19123
R2-35S-UBP12-homo-3.jpg	35S::UBP12_3.2	1859.5	170.65	5.13961
R2-35S-UBP12-homo-3.jpg	35S::UBP12_3.2	9497	871.556	6.77028
R2-35S-UBP12-homo-3.jpg	35S::UBP12_3.2	16336	1499.18	7.31268
R2-35S-UBP12-homo-3.jpg	35S::UBP12_3.2	6204.5	569.398	6.34458
R2-35S-UBP12-homo-3.jpg	35S::UBP12_3.2	3338.5	306.38	5.72483
R2-35S-UBP12-homo-3.jpg	35S::UBP12_3.2	2415.5	221.675	5.40121
R2-35S-UBP12-homo-3.jpg	35S::UBP12_3.2	18503	1698.05	7.43724
R2-35S-UBP12-homo-3.jpg	35S::UBP12_3.2	21509	1973.92	7.58778
R2-35S-UBP12-homo-3.jpg	35S::UBP12_3.2	6534	599.637	6.39632
R2-35S-UBP12-homo-3.jpg	35S::UBP12_3.2	11932	1095.02	6.99853
R2-35S-UBP12-homo-3.jpg	35S::UBP12_3.2	33315	3057.38	8.02531
R2-35S-UBP12-homo-3.jpg	35S::UBP12_3.2	28521.5	2617.47	7.86996
R2-35S-UBP12-homo-3.jpg	35S::UBP12_3.2	1026	94.1578	4.54497
R2-35S-UBP12-homo-3.jpg	35S::UBP12_3.2	690.5	63.3684	4.14897
R2-35S-UBP12-homo-3.jpg	35S::UBP12_3.2	5805	532.735	6.27802
R2-35S-UBP12-homo-3.jpg	35S::UBP12_3.2	6753.5	619.78	6.42937
R2-35S-UBP12-homo-3.jpg	35S::UBP12_3.2	3167.5	290.687	5.67225
R2-35S-UBP12-homo-3.jpg	35S::UBP12_3.2	1734	159.132	5.06974
R2-35S-UBP12-homo-3.jpg	35S::UBP12_3.2	26494.5	2431.45	7.79624
R2-35S-UBP12-homo-3.jpg	35S::UBP12_3.2	21084	1934.92	7.56782
R2-35S-UBP12-homo-3.jpg	35S::UBP12_3.2	21943.5	2013.79	7.60778
R2-35S-UBP12-homo-3.jpg	35S::UBP12_3.2	1131	103.794	4.64241
R2-35S-UBP12-homo-3.jpg	35S::UBP12_3.2	13912	1276.73	7.15206
R2-35S-UBP12-homo-3.jpg	35S::UBP12_3.2	9343.5	857.469	6.75399
R2-35S-UBP12-homo-3.jpg	35S::UBP12_3.2	3294	302.296	5.71141
R2-35S-UBP12-homo-3.jpg	35S::UBP12_3.2	1925.5	176.706	5.17449
R2-35S-UBP12-homo-3.jpg	35S::UBP12_3.2	3190	292.752	5.67933
R2-35S-UBP12-homo-3.jpg	35S::UBP12_3.2	42696	3918.29	8.27341
R2-35S-UBP12-homo-3.jpg	35S::UBP12_3.2	3107.5	285.181	5.65312
R2-35S-UBP12-homo-3.jpg	35S::UBP12_3.2	18828	1727.88	7.45465
R2-35S-UBP12-homo-3.jpg	35S::UBP12_3.2	7879	723.07	6.58351
R2-35S-UBP12-homo-3.jpg	35S::UBP12_3.2	23572	2163.24	7.67936
R2-35S-UBP12-homo-5.jpg	35S::UBP12_3.2	1283.5	117.789	4.7689
R2-35S-UBP12-homo-5.jpg	35S::UBP12_3.2	882.5	80.9886	4.39431
R2-35S-UBP12-homo-5.jpg	35S::UBP12_3.2	4082	374.612	5.92589
R2-35S-UBP12-homo-5.jpg	35S::UBP12_3.2	9456	867.794	6.76595
R2-35S-UBP12-homo-5.jpg	35S::UBP12_3.2	12375.5	1135.72	7.03502
R2-35S-UBP12-homo-5.jpg	35S::UBP12_3.2	468.5	42.9951	3.76109
R2-35S-UBP12-homo-5.jpg	35S::UBP12_3.2	2224.5	204.146	5.31884
R2-35S-UBP12-homo-5.jpg	35S::UBP12_3.2	339	31.1106	3.43755
R2-35S-UBP12-homo-5.jpg	35S::UBP12_3.2	11463.5	1052.03	6.95847
R2-35S-UBP12-homo-5.jpg	35S::UBP12_3.2	2132	195.657	5.27636
R2-35S-UBP12-homo-5.jpg	35S::UBP12_3.2	832.5	76.4	4.33598
R2-35S-UBP12-homo-5.jpg	35S::UBP12_3.2	19302.5	1771.42	7.47954
R2-35S-UBP12-homo-5.jpg	35S::UBP12_3.2	20088	1843.51	7.51943
R2-35S-UBP12-homo-5.jpg	35S::UBP12_3.2	5492	504.01	6.2226
R2-35S-UBP12-homo-5.jpg	35S::UBP12_3.2	6148	564.213	6.33543
R2-35S-UBP12-homo-5.jpg	35S::UBP12_3.2	2793.5	256.364	5.5466
R2-35S-UBP12-homo-5.jpg	35S::UBP12_3.2	5969	547.785	6.30588
R2-35S-UBP12-homo-5.jpg	35S::UBP12_3.2	11917.5	1093.69	6.99731
R2-35S-UBP12-homo-5.jpg	35S::UBP12_3.2	11549	1059.87	6.9659
R2-35S-UBP12-homo-5.jpg	35S::UBP12_3.2	11530	1058.13	6.96426
R2-35S-UBP12-homo-5.jpg	35S::UBP12_3.2	20531.5	1884.21	7.54126
R2-35S-UBP12-homo-5.jpg	35S::UBP12_3.2	2929	268.799	5.59397
R2-35S-UBP12-homo-5.jpg	35S::UBP12_3.2	4717	432.887	6.07048
R2-35S-UBP12-homo-5.jpg	35S::UBP12_3.2	2843	260.907	5.56416
R2-35S-UBP12-homo-5.jpg	35S::UBP12_3.2	8167.5	749.546	6.61947
R2-35S-UBP12-homo-5.jpg	35S::UBP12_3.2	25983	2384.51	7.77675
R2-35S-UBP12-homo-5.jpg	35S::UBP12_3.2	2342.5	214.975	5.37052
R2-35S-UBP12-homo-5.jpg	35S::UBP12_3.2	1098.5	100.811	4.61325
R2-35S-UBP12-homo-5.jpg	35S::UBP12_3.2	7141	655.342	6.48516
R2-35S-UBP12-homo-5.jpg	35S::UBP12_3.2	1260.5	115.678	4.75081
R2-35S-UBP12-homo-5.jpg	35S::UBP12_3.2	3597	330.103	5.7994
R2-35S-UBP12-homo-5.jpg	35S::UBP12_3.2	24025.5	2204.86	7.69842
R2-35S-UBP12-homo-5.jpg	35S::UBP12_3.2	1060.5	97.3239	4.57804
R2-35S-UBP12-homo-5.jpg	35S::UBP12_3.2	298.5	27.3939	3.31032
R2-35S-UBP12-homo-5.jpg	35S::UBP12_3.2	936	85.8983	4.45316
R2-35S-UBP12-homo-5.jpg	35S::UBP12_3.2	929	85.2559	4.44566
R2-35S-UBP12-homo-5.jpg	35S::UBP12_3.2	3003	275.591	5.61892
R2-35S-UBP12-homo-5.jpg	35S::UBP12_3.2	11814.5	1084.24	6.98863
R2-35S-UBP12-homo-5.jpg	35S::UBP12_3.2	2049.5	188.086	5.2369
R2-35S-UBP12-homo-5.jpg	35S::UBP12_3.2	14412	1322.61	7.18737
R2-35S-UBP12-homo-5.jpg	35S::UBP12_3.2	2612.5	239.754	5.47961
R2-35S-UBP12-homo-5.jpg	35S::UBP12_3.2	3534	324.321	5.78173
R2-35S-UBP12-homo-5.jpg	35S::UBP12_3.2	14562	1336.38	7.19772
R2-35S-UBP12-homo-5.jpg	35S::UBP12_3.2	6544	600.554	6.39785
R2-35S-UBP12-homo-5.jpg	35S::UBP12_3.2	8876.5	814.612	6.70271
R2-35S-UBP12-homo-5.jpg	35S::UBP12_3.2	2727.5	250.307	5.52269
R2-35S-UBP12-homo-5.jpg	35S::UBP12_3.2	22266.5	2043.44	7.62239
R2-35S-UBP12-homo-5.jpg	35S::UBP12_3.2	6257.5	574.262	6.35309
R2-35S-UBP12-homo-5.jpg	35S::UBP12_3.2	10161	932.493	6.83786
R2-35S-UBP12-homo-5.jpg	35S::UBP12_3.2	993.5	91.1752	4.51278
R2-35S-UBP12-homo-5.jpg	35S::UBP12_3.2	41040	3766.31	8.23385
R2-35S-UBP12-homo-5.jpg	35S::UBP12_3.2	11488.5	1054.32	6.96065
R2-35S-UBP12-homo-5.jpg	35S::UBP12_3.2	2542	233.284	5.45226
R2-35S-UBP12-homo-5.jpg	35S::UBP12_3.2	19564	1795.42	7.493
R2-35S-UBP12-homo-5.jpg	35S::UBP12_3.2	15960	1464.68	7.28939
R2-35S-UBP12-homo-5.jpg	35S::UBP12_3.2	524	48.0884	3.87304
R2-35S-UBP12-homo-5.jpg	35S::UBP12_3.2	1257.5	115.403	4.74843
R2-35S-UBP12-homo-5.jpg	35S::UBP12_3.2	10521	965.53	6.87268
R2-35S-UBP12-homo-5.jpg	35S::UBP12_3.2	949	87.0914	4.46696
R2-35S-UBP12-homo-5.jpg	35S::UBP12_3.2	7660.5	703.017	6.55538
R2-35S-UBP12-homo-5.jpg	35S::UBP12_3.2	2560.5	234.982	5.45951
R2-35S-UBP12-homo-5.jpg	35S::UBP12_3.2	1741	159.775	5.07376
R2-35S-UBP12-homo-5.jpg	35S::UBP12_3.2	629.5	57.7703	4.05647
R2-35S-UBP12-homo-5.jpg	35S::UBP12_3.2	3418	313.676	5.74836
R2-35S-UBP12-homo-5.jpg	35S::UBP12_3.2	18618.5	1708.65	7.44346
R2-35S-UBP12-homo-5.jpg	35S::UBP12_3.2	26976.5	2475.68	7.81427
R2-35S-UBP12-homo-5.jpg	35S::UBP12_3.2	8244.5	756.612	6.62885
R2-35S-UBP12-homo-5.jpg	35S::UBP12_3.2	2144	196.759	5.28198
R2-35S-UBP12-homo-5.jpg	35S::UBP12_3.2	6826.5	626.48	6.44012
R2-35S-UBP12-homo-5.jpg	35S::UBP12_3.2	2614	239.891	5.48019
R2-35S-UBP12-homo-5.jpg	35S::UBP12_3.2	14591.5	1339.09	7.19974
R2-35S-UBP12-homo-5.jpg	35S::UBP12_3.2	4584.5	420.728	6.04199
R2-35S-UBP12-homo-5.jpg	35S::UBP12_3.2	2265	207.863	5.33688
R2-35S-UBP12-homo-5.jpg	35S::UBP12_3.2	784.5	71.9949	4.2766
R2-35S-UBP12-homo-5.jpg	35S::UBP12_3.2	1361.5	124.947	4.82789
R2-35S-UBP12-homo-5.jpg	35S::UBP12_3.2	934.5	85.7607	4.45156
R2-35S-UBP12-homo-5.jpg	35S::UBP12_3.2	32168	2952.11	7.99028
R2-35S-UBP12-homo-5.jpg	35S::UBP12_3.2	1121	102.876	4.63353
R2-35S-UBP12-homo-5.jpg	35S::UBP12_3.2	4612.5	423.297	6.04807
R2-35S-UBP12-homo-5.jpg	35S::UBP12_3.2	2521.5	231.402	5.44416
R2-35S-UBP12-homo-5.jpg	35S::UBP12_3.2	15845.5	1454.17	7.28219
R2-35S-UBP12-homo-5.jpg	35S::UBP12_3.2	419	38.4524	3.64942
R2-35S-UBP12-homo-5.jpg	35S::UBP12_3.2	523	47.9966	3.87113
R2-35S-UBP12-homo-5.jpg	35S::UBP12_3.2	1441	132.243	4.88464
R2-35S-UBP12-homo-5.jpg	35S::UBP12_3.2	10452.5	959.244	6.86615
R2-35S-UBP12-homo-5.jpg	35S::UBP12_3.2	3460.5	317.576	5.76072
R2-35S-UBP12-homo-5.jpg	35S::UBP12_3.2	1526	140.044	4.94195
R2-35S-UBP12-homo-5.jpg	35S::UBP12_3.2	246.5	22.6217	3.11891
R2-35S-UBP12-homo-5.jpg	35S::UBP12_3.2	9240.5	848.017	6.7429
R2-35S-UBP12-homo-5.jpg	35S::UBP12_3.2	9797	899.088	6.80138
R2-35S-UBP12-homo-5.jpg	35S::UBP12_3.2	2440	223.923	5.4113
R2-35S-UBP12-homo-5.jpg	35S::UBP12_3.2	195.5	17.9414	2.88711
R2-35S-UBP12-homo-5.jpg	35S::UBP12_3.2	1010.5	92.7353	4.52975
R2-35S-UBP12-homo-5.jpg	35S::UBP12_3.2	32995.5	3028.05	8.01568
R2-35S-UBP12-homo-5.jpg	35S::UBP12_3.2	5174.5	474.873	6.16305
R2-35S-UBP12-homo-5.jpg	35S::UBP12_3.2	3246	297.891	5.69673
R2-35S-UBP12-homo-5.jpg	35S::UBP12_3.2	7463.5	684.938	6.52933
R2-35S-UBP12-homo-5.jpg	35S::UBP12_3.2	5531.5	507.635	6.22976
R2-35S-UBP12-homo-5.jpg	35S::UBP12_3.2	16298.5	1495.74	7.31038
R2-35S-UBP12-homo-5.jpg	35S::UBP12_3.2	5371	492.906	6.20032
R2-35S-UBP12-homo-5.jpg	35S::UBP12_3.2	5807	532.918	6.27837
R2-35S-UBP12-homo-5.jpg	35S::UBP12_3.2	7241.5	664.565	6.49913
R2-35S-UBP12-homo-5.jpg	35S::UBP12_3.2	34999.5	3211.96	8.07464
R2-35S-UBP12-homo-5.jpg	35S::UBP12_3.2	2699	247.692	5.51219
R2-35S-UBP12-homo-5.jpg	35S::UBP12_3.2	1297	119.028	4.77936
R2-35S-UBP12-homo-5.jpg	35S::UBP12_3.2	14579	1337.94	7.19889
R2-35S-UBP12-homo-5.jpg	35S::UBP12_3.2	12917.5	1185.46	7.07789
R2-35S-UBP12-homo-5.jpg	35S::UBP12_3.2	4025.5	369.427	5.91195
R2-35S-UBP12-homo-5.jpg	35S::UBP12_3.2	2798	256.777	5.54821
R2-35S-UBP12-homo-5.jpg	35S::UBP12_3.2	46467	4264.36	8.35805
R2-35S-UBP12-homo-5.jpg	35S::UBP12_3.2	1642.5	150.735	5.01552
R2-35S-UBP12-homo-5.jpg	35S::UBP12_3.2	20136.5	1847.96	7.52184
R2-35S-UBP12-homo-5.jpg	35S::UBP12_3.2	9388	861.553	6.75874
R2-35S-UBP12-homo-5.jpg	35S::UBP12_3.2	6767	621.019	6.43136
R2-35S-UBP12-homo-5.jpg	35S::UBP12_3.2	34844.5	3197.74	8.0702
R2-35S-UBP12-homo-5.jpg	35S::UBP12_3.2	9979	915.79	6.81979
R2-35S-UBP12-homo-5.jpg	35S::UBP12_3.2	4202.5	385.671	5.95498
R2-35S-UBP12-homo-5.jpg	35S::UBP12_3.2	4331.5	397.509	5.98522
R2-35S-UBP12-homo-5.jpg	35S::UBP12_3.2	20157.5	1849.89	7.52288
R2-35S-UBP12-homo-5.jpg	35S::UBP12_3.2	19204	1762.38	7.47442
R2-35S-UBP12-homo-5.jpg	35S::UBP12_3.2	8701.5	798.552	6.6828
R2-35S-UBP12-homo-5.jpg	35S::UBP12_3.2	1440	132.151	4.88395
R2-35S-UBP12-homo-5.jpg	35S::UBP12_3.2	4398.5	403.658	6.00057
R2-35S-UBP12-homo-5.jpg	35S::UBP12_3.2	12990	1192.11	7.08348
R2-35S-UBP12-homo-5.jpg	35S::UBP12_3.2	13439.5	1233.37	7.1175
R2-35S-UBP12-homo-5.jpg	35S::UBP12_3.2	2559.5	234.89	5.45912
R2-35S-UBP12-homo-5.jpg	35S::UBP12_3.2	2176	199.695	5.29679
R2-35S-UBP12-homo-5.jpg	35S::UBP12_3.2	217.5	19.9604	2.99375
R2-35S-UBP12-homo-5.jpg	35S::UBP12_3.2	318.5	29.2293	3.37517
R2-35S-UBP12-homo-5.jpg	35S::UBP12_3.2	754.5	69.2418	4.2376
R2-35S-UBP12-homo-5.jpg	35S::UBP12_3.2	13703.5	1257.59	7.13696
R2-35S-UBP12-homo-5.jpg	35S::UBP12_3.2	1838	168.676	5.12798
R2-35S-UBP12-homo-5.jpg	35S::UBP12_3.2	5734.5	526.265	6.2658
R2-35S-UBP12-homo-5.jpg	35S::UBP12_3.2	3951	362.59	5.89327
R2-35S-UBP12-homo-5.jpg	35S::UBP12_3.2	17280	1585.82	7.36885
R2-35S-UBP12-homo-5.jpg	35S::UBP12_3.2	7287	668.741	6.5054
R2-35S-UBP12-homo-5.jpg	35S::UBP12_3.2	18520	1699.61	7.43816
R2-35S-UBP12-homo-5.jpg	35S::UBP12_3.2	7686.5	705.403	6.55877
R2-35S-UBP12-homo-5.jpg	35S::UBP12_3.2	13235	1214.6	7.10217
R2-35S-UBP12-homo-5.jpg	35S::UBP12_3.2	22605.5	2074.55	7.6375
R2-35S-UBP12-homo-5.jpg	35S::UBP12_3.2	11692	1073	6.97821
R2-35S-UBP12-homo-5.jpg	35S::UBP12_3.2	15144	1389.79	7.23691
R2-35S-UBP12-homo-5.jpg	35S::UBP12_3.2	12664.5	1162.24	7.05811
R2-35S-UBP12-homo-5.jpg	35S::UBP12_3.2	25438.5	2334.54	7.75557
R3-35S-UBP12-homo-3.jpg	35S::UBP12_3.2	1627	149.313	5.00604
R3-35S-UBP12-homo-3.jpg	35S::UBP12_3.2	630.5	57.8621	4.05806
R3-35S-UBP12-homo-3.jpg	35S::UBP12_3.2	11620.5	1066.43	6.97208
R3-35S-UBP12-homo-3.jpg	35S::UBP12_3.2	9510.5	872.795	6.7717
R3-35S-UBP12-homo-3.jpg	35S::UBP12_3.2	3168	290.733	5.6724
R3-35S-UBP12-homo-3.jpg	35S::UBP12_3.2	18351	1684.1	7.42899
R3-35S-UBP12-homo-3.jpg	35S::UBP12_3.2	3026	277.701	5.62655
R3-35S-UBP12-homo-3.jpg	35S::UBP12_3.2	565	51.851	3.94837
R3-35S-UBP12-homo-3.jpg	35S::UBP12_3.2	509	46.7118	3.844
R3-35S-UBP12-homo-3.jpg	35S::UBP12_3.2	1022	93.7907	4.54107
R3-35S-UBP12-homo-3.jpg	35S::UBP12_3.2	4503.5	413.294	6.02416
R3-35S-UBP12-homo-3.jpg	35S::UBP12_3.2	2286.5	209.836	5.34633
R3-35S-UBP12-homo-3.jpg	35S::UBP12_3.2	800.5	73.4633	4.29679
R3-35S-UBP12-homo-3.jpg	35S::UBP12_3.2	2109	193.547	5.26552
R3-35S-UBP12-homo-3.jpg	35S::UBP12_3.2	1799	165.097	5.10654
R3-35S-UBP12-homo-3.jpg	35S::UBP12_3.2	9433.5	865.729	6.76357
R3-35S-UBP12-homo-3.jpg	35S::UBP12_3.2	10548.5	968.054	6.87529
R3-35S-UBP12-homo-3.jpg	35S::UBP12_3.2	7019	644.146	6.46793
R3-35S-UBP12-homo-3.jpg	35S::UBP12_3.2	19876	1824.06	7.50882
R3-35S-UBP12-homo-3.jpg	35S::UBP12_3.2	16588	1522.31	7.32798
R3-35S-UBP12-homo-3.jpg	35S::UBP12_3.2	852.5	78.2354	4.35972
R3-35S-UBP12-homo-3.jpg	35S::UBP12_3.2	10968	1006.55	6.91429
R3-35S-UBP12-homo-3.jpg	35S::UBP12_3.2	444.5	40.7925	3.7085
R3-35S-UBP12-homo-3.jpg	35S::UBP12_3.2	2872	263.568	5.57431
R3-35S-UBP12-homo-3.jpg	35S::UBP12_3.2	7470.5	685.581	6.53027
R3-35S-UBP12-homo-3.jpg	35S::UBP12_3.2	1176	107.924	4.68142
R3-35S-UBP12-homo-3.jpg	35S::UBP12_3.2	1171.5	107.511	4.67759
R3-35S-UBP12-homo-3.jpg	35S::UBP12_3.2	385.5	35.378	3.56609
R3-35S-UBP12-homo-3.jpg	35S::UBP12_3.2	433	39.7372	3.68229
R3-35S-UBP12-homo-3.jpg	35S::UBP12_3.2	12279.5	1126.91	7.02724
R3-35S-UBP12-homo-3.jpg	35S::UBP12_3.2	3005.5	275.82	5.61975
R3-35S-UBP12-homo-3.jpg	35S::UBP12_3.2	25250	2317.24	7.74813
R3-35S-UBP12-homo-3.jpg	35S::UBP12_3.2	1030	94.5249	4.54886
R3-35S-UBP12-homo-3.jpg	35S::UBP12_3.2	1512	138.759	4.93274
R3-35S-UBP12-homo-3.jpg	35S::UBP12_3.2	39565.5	3630.99	8.19726
R3-35S-UBP12-homo-3.jpg	35S::UBP12_3.2	1901	174.458	5.16168
R3-35S-UBP12-homo-3.jpg	35S::UBP12_3.2	4614.5	423.481	6.04851
R3-35S-UBP12-homo-3.jpg	35S::UBP12_3.2	8110	744.269	6.6124
R3-35S-UBP12-homo-3.jpg	35S::UBP12_3.2	882	80.9427	4.39374
R3-35S-UBP12-homo-3.jpg	35S::UBP12_3.2	759	69.6547	4.24355
R3-35S-UBP12-homo-3.jpg	35S::UBP12_3.2	46491	4266.56	8.35856
R3-35S-UBP12-homo-3.jpg	35S::UBP12_3.2	1262	115.816	4.752
R3-35S-UBP12-homo-3.jpg	35S::UBP12_3.2	9884.5	907.118	6.81027
R3-35S-UBP12-homo-3.jpg	35S::UBP12_3.2	2964	272.011	5.60584
R3-35S-UBP12-homo-3.jpg	35S::UBP12_3.2	2559	234.844	5.45892
R3-35S-UBP12-homo-3.jpg	35S::UBP12_3.2	21947.5	2014.16	7.60796
R3-35S-UBP12-homo-3.jpg	35S::UBP12_3.2	355	32.579	3.48367
R3-35S-UBP12-homo-3.jpg	35S::UBP12_3.2	1179	108.199	4.68397
R3-35S-UBP12-homo-3.jpg	35S::UBP12_3.2	4547.5	417.332	6.03388
R3-35S-UBP12-homo-3.jpg	35S::UBP12_3.2	16622	1525.43	7.33003
R3-35S-UBP12-homo-3.jpg	35S::UBP12_3.2	18344	1683.46	7.42861
R3-35S-UBP12-homo-3.jpg	35S::UBP12_3.2	10596	972.413	6.87978
R3-35S-UBP12-homo-3.jpg	35S::UBP12_3.2	660	60.5693	4.10379
R3-35S-UBP12-homo-3.jpg	35S::UBP12_3.2	7681	704.899	6.55805
R3-35S-UBP12-homo-3.jpg	35S::UBP12_3.2	2722.5	249.849	5.52085
R3-35S-UBP12-homo-3.jpg	35S::UBP12_3.2	2665	244.572	5.49951
R3-35S-UBP12-homo-3.jpg	35S::UBP12_3.2	36954.5	3391.38	8.12899
R3-35S-UBP12-homo-3.jpg	35S::UBP12_3.2	14260.5	1308.71	7.1768
R3-35S-UBP12-homo-3.jpg	35S::UBP12_3.2	1170.5	107.419	4.67674
R3-35S-UBP12-homo-3.jpg	35S::UBP12_3.2	3139.5	288.117	5.66337
R3-35S-UBP12-homo-3.jpg	35S::UBP12_3.2	3371	309.363	5.73451
R3-35S-UBP12-homo-3.jpg	35S::UBP12_3.2	29237	2683.13	7.89474
R3-35S-UBP12-homo-3.jpg	35S::UBP12_3.2	926	84.9806	4.44242
R3-35S-UBP12-homo-3.jpg	35S::UBP12_3.2	1921	176.294	5.17215
R3-35S-UBP12-homo-3.jpg	35S::UBP12_3.2	2249.5	206.441	5.33001
R3-35S-UBP12-homo-3.jpg	35S::UBP12_3.2	622.5	57.1279	4.04529
R3-35S-UBP12-homo-3.jpg	35S::UBP12_3.2	2237	205.293	5.32444
R3-35S-UBP12-homo-3.jpg	35S::UBP12_3.2	1301	119.395	4.78244
R3-35S-UBP12-homo-3.jpg	35S::UBP12_3.2	723	66.351	4.19496
R3-35S-UBP12-homo-3.jpg	35S::UBP12_3.2	4688.5	430.272	6.06442
R3-35S-UBP12-homo-3.jpg	35S::UBP12_3.2	24419.5	2241.02	7.71469
R3-35S-UBP12-homo-3.jpg	35S::UBP12_3.2	1649.5	151.377	5.01978
R3-35S-UBP12-homo-3.jpg	35S::UBP12_3.2	13011	1194.04	7.0851
R3-35S-UBP12-homo-3.jpg	35S::UBP12_3.2	1982	181.892	5.20341
R3-35S-UBP12-homo-3.jpg	35S::UBP12_3.2	26482	2430.3	7.79577
R3-35S-UBP12-homo-3.jpg	35S::UBP12_3.2	4595.5	421.737	6.04438
R3-35S-UBP12-homo-3.jpg	35S::UBP12_3.2	5864.5	538.195	6.28822
R3-35S-UBP12-homo-3.jpg	35S::UBP12_3.2	1385.5	127.15	4.84537
R3-35S-UBP12-homo-3.jpg	35S::UBP12_3.2	4928.5	452.297	6.11434
R3-35S-UBP12-homo-3.jpg	35S::UBP12_3.2	16770	1539.01	7.3389
R3-35S-UBP12-homo-3.jpg	35S::UBP12_3.2	3530.5	324	5.78074
R3-35S-UBP12-homo-3.jpg	35S::UBP12_3.2	19276.5	1769.04	7.47819
R3-35S-UBP12-homo-3.jpg	35S::UBP12_3.2	2353.5	215.985	5.37521
R3-35S-UBP12-homo-3.jpg	35S::UBP12_3.2	14496.5	1330.37	7.19321
R3-35S-UBP12-homo-3.jpg	35S::UBP12_3.2	295.5	27.1185	3.30022
R3-35S-UBP12-homo-3.jpg	35S::UBP12_3.2	9653.5	885.918	6.78662
R3-35S-UBP12-homo-3.jpg	35S::UBP12_3.2	3729.5	342.263	5.83558
R3-35S-UBP12-homo-3.jpg	35S::UBP12_3.2	9143	839.069	6.73229
R3-35S-UBP12-homo-3.jpg	35S::UBP12_3.2	8155.5	748.444	6.618
R3-35S-UBP12-homo-3.jpg	35S::UBP12_3.2	1168	107.189	4.6746
R3-35S-UBP12-homo-3.jpg	35S::UBP12_3.2	18703	1716.41	7.44799
R3-35S-UBP12-homo-3.jpg	35S::UBP12_3.2	10346	949.47	6.8559
R3-35S-UBP12-homo-3.jpg	35S::UBP12_3.2	36473.5	3347.24	8.11589
R3-35S-UBP12-homo-3.jpg	35S::UBP12_3.2	3488	320.1	5.76863
R3-35S-UBP12-homo-3.jpg	35S::UBP12_3.2	3107.5	285.181	5.65312
R3-35S-UBP12-homo-3.jpg	35S::UBP12_3.2	19321	1773.12	7.4805
R3-35S-UBP12-homo-3.jpg	35S::UBP12_3.2	25510.5	2341.14	7.75839
R3-35S-UBP12-homo-3.jpg	35S::UBP12_3.2	26757.5	2455.58	7.80612
R3-35S-UBP12-homo-3.jpg	35S::UBP12_3.2	15219.5	1396.72	7.24188
R3-35S-UBP12-homo-3.jpg	35S::UBP12_3.2	17696.5	1624.04	7.39267
R3-35S-UBP12-homo-3.jpg	35S::UBP12_3.2	25590	2348.44	7.76151
R3-35S-UBP12-homo-3.jpg	35S::UBP12_3.2	3053.5	280.225	5.63559
R3-35S-UBP12-homo-3.jpg	35S::UBP12_3.2	21366	1960.79	7.58111
[truncated: 5,698 more rows]

## Sheet: F2C Cellular analysis ubp12-2
Pavement cell areas							Average of LN Pavement cell area (um2) per drawing					Total pavement number, average pavement cell area and leaf area per leaf calculations
image cell drawing	genotype	Pavement cell area (pixel)	Pavement cell area (µm2)	LN Pavement cell area (µm2)			image cell drawing	genotype	Average of LN Pavement cell area (µm2)			repeat	line	leaf number	number of cells/drawing	Drawn area (pixel)	Drawn area (µm2)	Leaf area (mm2)	Average leaf area	Stdev. Leaf area	Leaf area (µm2)	number of stomata/drawing	Stomata per leaf	Stomatal density	Stomatal index	guard cells / drawing	pavement cell number / drawing	Extrapolation factor	Total cell number/leaf	pavement cell number/leaf	average pavement cell number	stdev. pavement cell number	Line	LN average pavement cell area (µm2)	Average pavement cell area (µm2)	average pavement cell area/line	stdev. pavement cell area/line
UBP12-2_H_R1_L1.jpg	ubp12-2	1326	121.689	4.80147			UBP12-2_H_R1_L1.jpg	ubp12-2	7.50584			R1	ubp12-2	L1	120	2546240	233673	197.12			197120000	25	21089.3	106.987	26.3158	50	70	843.572	101229	59050.1				7.50584	1818.62
UBP12-2_H_R1_L1.jpg	ubp12-2	37652.5	3455.44	8.1477			UBP12-2_H_R1_L2.jpg	ubp12-2	7.29373			R1	ubp12-2	L2	132	2213100	203100	163.804	183.729	17.5927	163804000	27	21776	132.939	25.7143	54	78	806.519	106460	62908.5	58443.3	4797.49	ubp12-2	7.29373	1471.05	1812.36	338.225
UBP12-2_H_R1_L1.jpg	ubp12-2	5797	532.001	6.27664			UBP12-2_H_R1_L3.jpg	ubp12-2	7.67202			R1	ubp12-2	L3	111	2680310	245977	190.262			190262000	21	16243.4	85.3739	23.3333	42	69	773.496	85858.1	53371.2				7.67202	2147.41
UBP12-2_H_R1_L1.jpg	ubp12-2	20444	1876.18	7.53699			UBP12-2_H_R2_L1.jpg	ubp12-2	7.23496			R2	ubp12-2	L1	155	2876100	263945	180.506			180506000	31	21200.2	117.449	25	62	93	683.878	106001	63600.7				7.23496	1387.08
UBP12-2_H_R1_L1.jpg	ubp12-2	33729	3095.37	8.03766			UBP12-2_H_R2_L2.jpg	ubp12-2	7.39676			R2	ubp12-2	L2	146	2907120	266791	174.94	177.045	3.02062	174940000	29	19015.8	108.699	24.7863	58	88	655.718	95734.9	57703.2	57228.5	6622.31	ubp12-2	7.39676	1630.7	1648.39	270.588
UBP12-2_H_R1_L1.jpg	ubp12-2	4464.5	409.715	6.01546			UBP12-2_H_R2_L3.jpg	ubp12-2	7.56392			R2	ubp12-2	L3	117	2621880	240614	175.689			175689000	24	17524	99.7446	25.8065	48	69	730.168	85429.7	50381.6				7.56392	1927.39
UBP12-2_H_R1_L1.jpg	ubp12-2	16057	1473.58	7.29545			UBP12-2_H_R3_L1.jpg	ubp12-2	7.69749			R3	ubp12-2	L1	120	2930370	268925	156.014			156014000	25	14503.5	92.9627	26.3158	50	70	580.139	69616.7	40609.7				7.69749	2202.81
UBP12-2_H_R1_L1.jpg	ubp12-2	10229.5	938.779	6.84458			UBP12-2_H_R3_L2.jpg	ubp12-2	7.90567			R3	ubp12-2	L2	101	3073340	282046	144.946	151.571	5.84792	144946000	22	11306	78.0015	27.8481	44	57	513.91	51904.9	29292.8	37583.5	7266.65	ubp12-2	7.90567	2712.61	2403.27	271.781
UBP12-2_H_R1_L1.jpg	ubp12-2	52545	4822.15	8.48097			UBP12-2_H_R3_L3.jpg	ubp12-2	7.73822			R3	ubp12-2	L3	120	3049870	279892	153.754			153754000	21	11536	75.029	21.2121	42	78	549.334	65920	42848				7.73822	2294.39
UBP12-2_H_R1_L1.jpg	ubp12-2	59356	5447.2	8.60286			UBP12-2_W_R1_L1.jpg	Col-0	7.88184			R1	Col-0	L1	114	3471400	318576	268.394			268394000	22	18534.5	69.0572	23.913	44	70	842.479	96042.6	58973.5				7.88184	2648.74
UBP12-2_H_R1_L1.jpg	ubp12-2	100288	9203.6	9.12735			UBP12-2_WT_R1_L2.jpg	Col-0	7.8801			R1	Col-0	L2	95	2948820	270618	226.26	248.502	21.1651	226260000	20	16721.7	73.9048	26.6667	40	55	836.085	79428.1	45984.7	52876.8	6530.85	Col-0	7.8801	2644.14	2576.88	120.508
UBP12-2_H_R1_L1.jpg	ubp12-2	33731	3095.55	8.03772			UBP12-2_WT_R1_L3.jpg	Col-0	7.79883			R1	Col-0	L3	97	2902930	266407	250.853			250853000	20	18832.3	75.0731	25.974	40	57	941.616	91336.7	53672.1				7.79883	2437.75
UBP12-2_H_R1_L1.jpg	ubp12-2	3614	331.663	5.80412			UBP12-2_WT_R2_L1.jpg	Col-0	7.75611			R2	Col-0	L1	111	3336530	306199	252.516			252516000	21	17318.3	68.5828	23.3333	42	69	824.679	91539.4	56902.8				7.75611	2335.79
UBP12-2_H_R1_L1.jpg	ubp12-2	5996	550.263	6.3104			UBP12-2_WT_R2_L2.jpg	Col-0	7.86521			R2	Col-0	L2	114	3323220	304978	259.701	257.934	4.78613	2.59701e+08	21	17882.4	68.8575	22.5806	42	72	851.541	97075.7	61311	60898.7	3806.52	Col-0	7.86521	2605.07	2405.1	175.88
UBP12-2_H_R1_L1.jpg	ubp12-2	10402	954.61	6.8613			UBP12-2_WT_R2_L3.jpg	Col-0	7.72948			R2	Col-0	L3	124	3271120	300196	261.586			261586000	25	21784.6	83.2788	25.2525	50	74	871.383	108051	64482.3				7.72948	2274.42
UBP12-2_H_R1_L1.jpg	ubp12-2	47833.5	4389.76	8.38703			UBP12-2_WT_R3_L1.jpg	Col-0	7.79655			R3	Col-0	L1	127	3111120	285513	241.793			241793000	25	21171.8	87.5617	24.5098	50	77	846.872	107553	65209.2				7.79655	2432.19
UBP12-2_H_R1_L1.jpg	ubp12-2	26085	2393.87	7.78066			UBP12-2_WT_R3_L2.jpg	Col-0	7.74471			R3	Col-0	L2	119	3068430	281595	244.259	243.402	1.39415	244259000	26	22552.7	92.3311	27.957	52	67	867.412	103222	58116.6	58774.2	6132.7	Col-0	7.74471	2309.33	2451.36	152.528
UBP12-2_H_R1_L1.jpg	ubp12-2	13490.5	1238.05	7.12129			UBP12-2_WT_R3_L3.jpg	Col-0	7.86809			R3	Col-0	L3	111	3363400	308665	244.153			2.44153e+08	22	17401.9	71.2747	24.7191	44	67	790.997	87800.6	52996.8				7.86809	2612.57
UBP12-2_H_R1_L1.jpg	ubp12-2	35750.5	3280.89	8.09587
UBP12-2_H_R1_L1.jpg	ubp12-2	50412.5	4626.44	8.43954								Statistical analysis (ANOVA, Dunnett's test)
UBP12-2_H_R1_L1.jpg	ubp12-2	22553.5	2069.77	7.63519
UBP12-2_H_R1_L1.jpg	ubp12-2	39492.5	3624.3	8.19542								Leaf area ubp12-2				Cell number ubp12-2				Cell area ubp12-2
UBP12-2_H_R1_L1.jpg	ubp12-2	89724.5	8234.17	9.01605
UBP12-2_H_R1_L1.jpg	ubp12-2	15818.5	1451.69	7.28048								Line	Repeat	Area		Line	Repeat	Area		Line	Repeat	Area
UBP12-2_H_R1_L1.jpg	ubp12-2	22757	2088.45	7.64418								Col-0	1	268.394		Col-0	1	59000		Col-0	1	2648.74
UBP12-2_H_R1_L1.jpg	ubp12-2	45565	4181.58	8.33844								Col-0	1	226.26		Col-0	1	46000		Col-0	1	2644.14
UBP12-2_H_R1_L1.jpg	ubp12-2	9718	891.838	6.79328								Col-0	1	250.853		Col-0	1	53700		Col-0	1	2437.76
UBP12-2_H_R1_L1.jpg	ubp12-2	27444	2518.58	7.83145								Col-0	2	252.516		Col-0	2	56900		Col-0	2	2335.8
UBP12-2_H_R1_L1.jpg	ubp12-2	63380.5	5816.54	8.66846								Col-0	2	259.701		Col-0	2	61300		Col-0	2	2605.07
UBP12-2_H_R1_L1.jpg	ubp12-2	29416.5	2699.6	7.90086								Col-0	2	261.586		Col-0	2	64500		Col-0	2	2274.42
UBP12-2_H_R1_L1.jpg	ubp12-2	58220	5342.95	8.58353								Col-0	3	241.793		Col-0	3	65200		Col-0	3	2432.19
UBP12-2_H_R1_L1.jpg	ubp12-2	6411	588.349	6.37732								Col-0	3	244.259		Col-0	3	58100		Col-0	3	2309.33
UBP12-2_H_R1_L1.jpg	ubp12-2	19373.5	1777.94	7.48321								Col-0	3	244.153		Col-0	3	53000		Col-0	3	2612.57
UBP12-2_H_R1_L1.jpg	ubp12-2	10462.5	960.162	6.8671								ubp12-2	1	197.12		ubp12-2	1	59100		ubp12-2	1	1818.62
UBP12-2_H_R1_L1.jpg	ubp12-2	3777.5	346.668	5.84837								ubp12-2	1	163.804		ubp12-2	1	62900		ubp12-2	1	1471.05
UBP12-2_H_R1_L1.jpg	ubp12-2	75133.5	6895.13	8.83857								ubp12-2	1	190.262		ubp12-2	1	53400		ubp12-2	1	2147.41
UBP12-2_H_R1_L1.jpg	ubp12-2	10073	924.417	6.82916								ubp12-2	2	180.506		ubp12-2	2	63600		ubp12-2	2	1387.08
UBP12-2_H_R1_L1.jpg	ubp12-2	63853.5	5859.95	8.6759								ubp12-2	2	174.94		ubp12-2	2	57700		ubp12-2	2	1630.7
UBP12-2_H_R1_L1.jpg	ubp12-2	40669	3732.26	8.22477								ubp12-2	2	175.689		ubp12-2	2	50400		ubp12-2	2	1927.39
UBP12-2_H_R1_L1.jpg	ubp12-2	4313.5	395.857	5.98105								ubp12-2	3	156.014		ubp12-2	3	40600		ubp12-2	3	2202.81
UBP12-2_H_R1_L1.jpg	ubp12-2	1894	173.816	5.158								ubp12-2	3	144.946		ubp12-2	3	29300		ubp12-2	3	2712.61
UBP12-2_H_R1_L1.jpg	ubp12-2	47396.5	4349.66	8.37785								ubp12-2	3	153.754		ubp12-2	3	42800		ubp12-2	3	2294.39
UBP12-2_H_R1_L1.jpg	ubp12-2	26369.5	2419.97	7.79151
UBP12-2_H_R1_L1.jpg	ubp12-2	6766	620.928	6.43121
UBP12-2_H_R1_L1.jpg	ubp12-2	54260.5	4979.58	8.5131								ANOVA (Dunnett's test)		p adj		ANOVA (Dunnett's test)		p adj		ANOVA (Dunnett's test)		p adj
UBP12-2_H_R1_L1.jpg	ubp12-2	2276	208.872	5.34172								ubp12-2-Col-0		0		ubp12-2-Col-0		0.041247		ubp12-2-Col-0		0.0004883
UBP12-2_H_R1_L1.jpg	ubp12-2	56087	5147.2	8.54621
UBP12-2_H_R1_L1.jpg	ubp12-2	70707	6488.9	8.77785
UBP12-2_H_R1_L1.jpg	ubp12-2	5172	474.643	6.16256
UBP12-2_H_R1_L1.jpg	ubp12-2	12637.5	1159.77	7.05597
UBP12-2_H_R1_L1.jpg	ubp12-2	21839.5	2004.25	7.60302
UBP12-2_H_R1_L1.jpg	ubp12-2	86394.5	7928.57	8.97823
UBP12-2_H_R1_L1.jpg	ubp12-2	49001.5	4496.95	8.41116
UBP12-2_H_R1_L1.jpg	ubp12-2	20756.5	1904.86	7.55216
UBP12-2_H_R1_L1.jpg	ubp12-2	7305.5	670.438	6.50793
UBP12-2_H_R1_L1.jpg	ubp12-2	40975.5	3760.39	8.23228
UBP12-2_H_R1_L1.jpg	ubp12-2	61846	5675.71	8.64395
UBP12-2_H_R1_L1.jpg	ubp12-2	37749.5	3464.34	8.15028
UBP12-2_H_R1_L1.jpg	ubp12-2	23880	2191.51	7.69235
UBP12-2_H_R1_L1.jpg	ubp12-2	6771	621.386	6.43195
UBP12-2_H_R1_L1.jpg	ubp12-2	14315.5	1313.76	7.18065
UBP12-2_H_R1_L1.jpg	ubp12-2	9758	895.509	6.79739
UBP12-2_H_R1_L1.jpg	ubp12-2	2185	200.521	5.30092
UBP12-2_H_R1_L1.jpg	ubp12-2	19402.5	1780.6	7.48471
UBP12-2_H_R1_L1.jpg	ubp12-2	4530	415.726	6.03003
UBP12-2_H_R1_L1.jpg	ubp12-2	17153	1574.16	7.36148
UBP12-2_H_R1_L1.jpg	ubp12-2	96245	8832.57	9.0862
UBP12-2_H_R1_L1.jpg	ubp12-2	13141	1205.97	7.09504
UBP12-2_H_R1_L1.jpg	ubp12-2	108397	9947.78	9.2051
UBP12-2_H_R1_L1.jpg	ubp12-2	53008.5	4864.68	8.48976
UBP12-2_H_R1_L2.jpg	ubp12-2	23018.5	2112.45	7.6556
UBP12-2_H_R1_L2.jpg	ubp12-2	26264	2410.29	7.7875
UBP12-2_H_R1_L2.jpg	ubp12-2	5647.5	518.281	6.25052
UBP12-2_H_R1_L2.jpg	ubp12-2	29193	2679.09	7.89323
UBP12-2_H_R1_L2.jpg	ubp12-2	51101.5	4689.67	8.45312
UBP12-2_H_R1_L2.jpg	ubp12-2	2727.5	250.307	5.52269
UBP12-2_H_R1_L2.jpg	ubp12-2	7219	662.5	6.49602
UBP12-2_H_R1_L2.jpg	ubp12-2	5266	483.27	6.18058
UBP12-2_H_R1_L2.jpg	ubp12-2	25683.5	2357.02	7.76515
UBP12-2_H_R1_L2.jpg	ubp12-2	77185.5	7083.45	8.86552
UBP12-2_H_R1_L2.jpg	ubp12-2	8146.5	747.618	6.61689
UBP12-2_H_R1_L2.jpg	ubp12-2	2683.5	246.269	5.50643
UBP12-2_H_R1_L2.jpg	ubp12-2	5697.5	522.869	6.25933
UBP12-2_H_R1_L2.jpg	ubp12-2	5666.5	520.025	6.25388
UBP12-2_H_R1_L2.jpg	ubp12-2	13889.5	1274.66	7.15044
UBP12-2_H_R1_L2.jpg	ubp12-2	7033.5	645.477	6.46999
UBP12-2_H_R1_L2.jpg	ubp12-2	71665	6576.82	8.79131
UBP12-2_H_R1_L2.jpg	ubp12-2	15938.5	1462.7	7.28804
UBP12-2_H_R1_L2.jpg	ubp12-2	3778	346.714	5.8485
UBP12-2_H_R1_L2.jpg	ubp12-2	23499	2156.54	7.67626
UBP12-2_H_R1_L2.jpg	ubp12-2	7759	712.057	6.56816
UBP12-2_H_R1_L2.jpg	ubp12-2	7068	648.643	6.47488
UBP12-2_H_R1_L2.jpg	ubp12-2	20113	1845.8	7.52067
UBP12-2_H_R1_L2.jpg	ubp12-2	16439.5	1508.68	7.31899
UBP12-2_H_R1_L2.jpg	ubp12-2	65421	6003.8	8.70015
UBP12-2_H_R1_L2.jpg	ubp12-2	36430	3343.24	8.1147
UBP12-2_H_R1_L2.jpg	ubp12-2	2587.5	237.459	5.47
UBP12-2_H_R1_L2.jpg	ubp12-2	35315	3240.92	8.08361
UBP12-2_H_R1_L2.jpg	ubp12-2	4046	371.308	5.91703
UBP12-2_H_R1_L2.jpg	ubp12-2	30861.5	2832.21	7.94881
UBP12-2_H_R1_L2.jpg	ubp12-2	10075.5	924.646	6.82941
UBP12-2_H_R1_L2.jpg	ubp12-2	18821	1727.24	7.45428
UBP12-2_H_R1_L2.jpg	ubp12-2	58830.5	5398.98	8.59396
UBP12-2_H_R1_L2.jpg	ubp12-2	51167.5	4695.73	8.45441
UBP12-2_H_R1_L2.jpg	ubp12-2	79348.5	7281.95	8.89315
UBP12-2_H_R1_L2.jpg	ubp12-2	6173	566.507	6.33949
UBP12-2_H_R1_L2.jpg	ubp12-2	3206	294.22	5.68433
UBP12-2_H_R1_L2.jpg	ubp12-2	18337	1682.82	7.42823
UBP12-2_H_R1_L2.jpg	ubp12-2	13915.5	1277.05	7.15231
UBP12-2_H_R1_L2.jpg	ubp12-2	28279.5	2595.26	7.86144
UBP12-2_H_R1_L2.jpg	ubp12-2	7907	725.639	6.58705
UBP12-2_H_R1_L2.jpg	ubp12-2	19285.5	1769.86	7.47866
UBP12-2_H_R1_L2.jpg	ubp12-2	5504	505.112	6.22478
UBP12-2_H_R1_L2.jpg	ubp12-2	34431	3159.79	8.05826
UBP12-2_H_R1_L2.jpg	ubp12-2	26262.5	2410.16	7.78745
UBP12-2_H_R1_L2.jpg	ubp12-2	64782	5945.16	8.69033
UBP12-2_H_R1_L2.jpg	ubp12-2	41349.5	3794.72	8.24136
UBP12-2_H_R1_L2.jpg	ubp12-2	44057.5	4043.23	8.3048
UBP12-2_H_R1_L2.jpg	ubp12-2	2388.5	219.197	5.38997
UBP12-2_H_R1_L2.jpg	ubp12-2	22401	2055.78	7.62841
UBP12-2_H_R1_L2.jpg	ubp12-2	20478	1879.3	7.53866
UBP12-2_H_R1_L2.jpg	ubp12-2	9288.5	852.422	6.74808
UBP12-2_H_R1_L2.jpg	ubp12-2	73140	6712.18	8.81168
UBP12-2_H_R1_L2.jpg	ubp12-2	14917.5	1369	7.22184
UBP12-2_H_R1_L2.jpg	ubp12-2	6228	571.554	6.34836
UBP12-2_H_R1_L2.jpg	ubp12-2	70998.5	6515.66	8.78196
UBP12-2_H_R1_L2.jpg	ubp12-2	12872	1181.29	7.07436
UBP12-2_H_R1_L2.jpg	ubp12-2	36353	3336.18	8.11258
UBP12-2_H_R1_L2.jpg	ubp12-2	31872.5	2924.99	7.98105
UBP12-2_H_R1_L2.jpg	ubp12-2	34496	3165.76	8.06015
UBP12-2_H_R1_L2.jpg	ubp12-2	10668.5	979.067	6.8866
UBP12-2_H_R1_L2.jpg	ubp12-2	2275.5	208.827	5.3415
UBP12-2_H_R1_L2.jpg	ubp12-2	14712	1350.15	7.20797
UBP12-2_H_R1_L2.jpg	ubp12-2	7175	658.462	6.48991
UBP12-2_H_R1_L2.jpg	ubp12-2	87545	8034.16	8.99146
UBP12-2_H_R1_L2.jpg	ubp12-2	33833.5	3104.96	8.04076
UBP12-2_H_R1_L2.jpg	ubp12-2	25860	2373.22	7.772
UBP12-2_H_R1_L2.jpg	ubp12-2	36881	3384.63	8.127
UBP12-2_H_R1_L2.jpg	ubp12-2	5750	527.687	6.2685
UBP12-2_H_R1_L2.jpg	ubp12-2	8693	797.772	6.68182
UBP12-2_H_R1_L2.jpg	ubp12-2	38263	3511.46	8.16379
UBP12-2_H_R1_L2.jpg	ubp12-2	28919.5	2653.99	7.88382
UBP12-2_H_R1_L2.jpg	ubp12-2	8354.5	766.707	6.6421
UBP12-2_H_R1_L2.jpg	ubp12-2	15294	1403.56	7.24676
UBP12-2_H_R1_L2.jpg	ubp12-2	20809	1909.68	7.55469
UBP12-2_H_R1_L2.jpg	ubp12-2	4924	451.884	6.11343
UBP12-2_H_R1_L2.jpg	ubp12-2	42824.5	3930.08	8.27641
UBP12-2_H_R1_L2.jpg	ubp12-2	8119	745.095	6.61351
UBP12-2_H_R1_L3.jpg	ubp12-2	26019	2387.81	7.77813
UBP12-2_H_R1_L3.jpg	ubp12-2	71165.5	6530.98	8.78431
UBP12-2_H_R1_L3.jpg	ubp12-2	7845.5	719.995	6.57924
UBP12-2_H_R1_L3.jpg	ubp12-2	9873	906.062	6.80911
UBP12-2_H_R1_L3.jpg	ubp12-2	31074	2851.71	7.95568
UBP12-2_H_R1_L3.jpg	ubp12-2	46199.5	4239.81	8.35227
UBP12-2_H_R1_L3.jpg	ubp12-2	7605.5	697.97	6.54818
UBP12-2_H_R1_L3.jpg	ubp12-2	20856.5	1914.04	7.55697
UBP12-2_H_R1_L3.jpg	ubp12-2	125710	11536.6	9.35328
UBP12-2_H_R1_L3.jpg	ubp12-2	30027.5	2755.68	7.92142
UBP12-2_H_R1_L3.jpg	ubp12-2	12095.5	1110.03	7.01214
UBP12-2_H_R1_L3.jpg	ubp12-2	34689	3183.47	8.06573
UBP12-2_H_R1_L3.jpg	ubp12-2	10911	1001.32	6.90908
UBP12-2_H_R1_L3.jpg	ubp12-2	7441.5	682.919	6.52638
UBP12-2_H_R1_L3.jpg	ubp12-2	93041.5	8538.58	9.05235
UBP12-2_H_R1_L3.jpg	ubp12-2	23629	2168.47	7.68178
UBP12-2_H_R1_L3.jpg	ubp12-2	62263	5713.98	8.65067
UBP12-2_H_R1_L3.jpg	ubp12-2	23809	2184.99	7.68937
UBP12-2_H_R1_L3.jpg	ubp12-2	15280	1402.27	7.24585
UBP12-2_H_R1_L3.jpg	ubp12-2	25790.5	2366.84	7.76931
UBP12-2_H_R1_L3.jpg	ubp12-2	23945.5	2197.52	7.69508
UBP12-2_H_R1_L3.jpg	ubp12-2	42907	3937.65	8.27834
UBP12-2_H_R1_L3.jpg	ubp12-2	146506	13445.1	9.50637
UBP12-2_H_R1_L3.jpg	ubp12-2	50863	4667.79	8.44844
UBP12-2_H_R1_L3.jpg	ubp12-2	21916	2011.27	7.60652
UBP12-2_H_R1_L3.jpg	ubp12-2	35250.5	3235	8.08178
UBP12-2_H_R1_L3.jpg	ubp12-2	64609	5929.28	8.68766
UBP12-2_H_R1_L3.jpg	ubp12-2	2132.5	195.703	5.2766
UBP12-2_H_R1_L3.jpg	ubp12-2	18496.5	1697.46	7.43689
UBP12-2_H_R1_L3.jpg	ubp12-2	20557.5	1886.6	7.54253
UBP12-2_H_R1_L3.jpg	ubp12-2	4649.5	426.693	6.05606
UBP12-2_H_R1_L3.jpg	ubp12-2	9719	891.93	6.79339
UBP12-2_H_R1_L3.jpg	ubp12-2	36376	3338.29	8.11321
UBP12-2_H_R1_L3.jpg	ubp12-2	6117.5	561.414	6.33046
UBP12-2_H_R1_L3.jpg	ubp12-2	4885.5	448.351	6.10558
UBP12-2_H_R1_L3.jpg	ubp12-2	9021.5	827.919	6.71891
UBP12-2_H_R1_L3.jpg	ubp12-2	16502	1514.42	7.32279
UBP12-2_H_R1_L3.jpg	ubp12-2	20667.5	1896.69	7.54787
UBP12-2_H_R1_L3.jpg	ubp12-2	23602	2166	7.68064
UBP12-2_H_R1_L3.jpg	ubp12-2	41534	3811.65	8.24582
UBP12-2_H_R1_L3.jpg	ubp12-2	36183	3320.58	8.10789
UBP12-2_H_R1_L3.jpg	ubp12-2	44946	4124.77	8.32477
UBP12-2_H_R1_L3.jpg	ubp12-2	46661	4282.16	8.36221
UBP12-2_H_R1_L3.jpg	ubp12-2	90095.5	8268.22	9.02017
UBP12-2_H_R1_L3.jpg	ubp12-2	5209.5	478.085	6.16979
UBP12-2_H_R1_L3.jpg	ubp12-2	64844.5	5950.89	8.6913
UBP12-2_H_R1_L3.jpg	ubp12-2	13858	1271.77	7.14817
UBP12-2_H_R1_L3.jpg	ubp12-2	6132.5	562.79	6.33291
UBP12-2_H_R1_L3.jpg	ubp12-2	7272	667.364	6.50334
UBP12-2_H_R1_L3.jpg	ubp12-2	8471.5	777.444	6.65601
UBP12-2_H_R1_L3.jpg	ubp12-2	24053.5	2207.43	7.69958
UBP12-2_H_R1_L3.jpg	ubp12-2	80988.5	7432.46	8.91361
UBP12-2_H_R1_L3.jpg	ubp12-2	17319	1589.39	7.37111
UBP12-2_H_R1_L3.jpg	ubp12-2	27957.5	2565.71	7.84999
UBP12-2_H_R1_L3.jpg	ubp12-2	53510.5	4910.75	8.49918
UBP12-2_H_R1_L3.jpg	ubp12-2	56041	5142.98	8.54539
UBP12-2_H_R1_L3.jpg	ubp12-2	48408	4442.49	8.39897
UBP12-2_H_R1_L3.jpg	ubp12-2	65167	5980.49	8.69626
UBP12-2_H_R1_L3.jpg	ubp12-2	3385.5	310.693	5.73881
UBP12-2_H_R1_L3.jpg	ubp12-2	5835	535.488	6.28318
UBP12-2_H_R1_L3.jpg	ubp12-2	35064.5	3217.93	8.07649
UBP12-2_H_R1_L3.jpg	ubp12-2	19364.5	1777.11	7.48275
UBP12-2_H_R1_L3.jpg	ubp12-2	40089.5	3679.08	8.21042
UBP12-2_H_R1_L3.jpg	ubp12-2	72443	6648.22	8.8021
UBP12-2_H_R1_L3.jpg	ubp12-2	13090.5	1201.34	7.09119
UBP12-2_H_R1_L3.jpg	ubp12-2	61554	5648.92	8.63922
UBP12-2_H_R1_L3.jpg	ubp12-2	33887	3109.87	8.04234
UBP12-2_H_R1_L3.jpg	ubp12-2	12135.5	1113.7	7.01544
UBP12-2_H_R1_L3.jpg	ubp12-2	86586	7946.15	8.98044
UBP12-2_H_R2_L1.jpg	ubp12-2	101548	9319.24	9.13984
UBP12-2_H_R2_L1.jpg	ubp12-2	44076	4044.93	8.30522
UBP12-2_H_R2_L1.jpg	ubp12-2	46835	4298.13	8.36594
UBP12-2_H_R2_L1.jpg	ubp12-2	31570	2897.23	7.97151
UBP12-2_H_R2_L1.jpg	ubp12-2	1698	155.828	5.04876
UBP12-2_H_R2_L1.jpg	ubp12-2	2126.5	195.153	5.27378
UBP12-2_H_R2_L1.jpg	ubp12-2	4461.5	409.44	6.01479
UBP12-2_H_R2_L1.jpg	ubp12-2	2377	218.141	5.38514
UBP12-2_H_R2_L1.jpg	ubp12-2	10944.5	1004.4	6.91214
UBP12-2_H_R2_L1.jpg	ubp12-2	16129	1480.19	7.29992
UBP12-2_H_R2_L1.jpg	ubp12-2	24757.5	2272.04	7.72843
UBP12-2_H_R2_L1.jpg	ubp12-2	9069.5	832.324	6.72422
UBP12-2_H_R2_L1.jpg	ubp12-2	8025	736.468	6.60187
UBP12-2_H_R2_L1.jpg	ubp12-2	5497	504.469	6.22351
UBP12-2_H_R2_L1.jpg	ubp12-2	116427	10684.7	9.27657
UBP12-2_H_R2_L1.jpg	ubp12-2	5554	509.7	6.23382
UBP12-2_H_R2_L1.jpg	ubp12-2	4933.5	452.756	6.11535
UBP12-2_H_R2_L1.jpg	ubp12-2	47629.5	4371.04	8.38276
UBP12-2_H_R2_L1.jpg	ubp12-2	9297.5	853.248	6.74905
UBP12-2_H_R2_L1.jpg	ubp12-2	19544	1793.59	7.49197
UBP12-2_H_R2_L1.jpg	ubp12-2	10337	948.644	6.85503
UBP12-2_H_R2_L1.jpg	ubp12-2	60997	5597.8	8.63013
UBP12-2_H_R2_L1.jpg	ubp12-2	14527.5	1333.21	7.19535
UBP12-2_H_R2_L1.jpg	ubp12-2	36132	3315.9	8.10648
UBP12-2_H_R2_L1.jpg	ubp12-2	33607	3084.17	8.03404
UBP12-2_H_R2_L1.jpg	ubp12-2	74875	6871.41	8.83512
UBP12-2_H_R2_L1.jpg	ubp12-2	32603.5	2992.08	8.00372
UBP12-2_H_R2_L1.jpg	ubp12-2	3909	358.736	5.88259
UBP12-2_H_R2_L1.jpg	ubp12-2	29953.5	2748.88	7.91895
UBP12-2_H_R2_L1.jpg	ubp12-2	85166	7815.83	8.96391
UBP12-2_H_R2_L1.jpg	ubp12-2	49833	4573.26	8.42798
UBP12-2_H_R2_L1.jpg	ubp12-2	4062.5	372.823	5.9211
UBP12-2_H_R2_L1.jpg	ubp12-2	9851	904.043	6.80688
UBP12-2_H_R2_L1.jpg	ubp12-2	23663.5	2171.64	7.68324
UBP12-2_H_R2_L1.jpg	ubp12-2	4021	369.014	5.91084
UBP12-2_H_R2_L1.jpg	ubp12-2	83253.5	7640.32	8.94119
UBP12-2_H_R2_L1.jpg	ubp12-2	12239.5	1123.24	7.02397
UBP12-2_H_R2_L1.jpg	ubp12-2	5671	520.438	6.25467
UBP12-2_H_R2_L1.jpg	ubp12-2	72670.5	6669.1	8.80524
UBP12-2_H_R2_L1.jpg	ubp12-2	6016	552.099	6.31373
UBP12-2_H_R2_L1.jpg	ubp12-2	1080	99.1135	4.59627
UBP12-2_H_R2_L1.jpg	ubp12-2	5704	523.466	6.26047
UBP12-2_H_R2_L1.jpg	ubp12-2	22875	2099.28	7.64935
UBP12-2_H_R2_L1.jpg	ubp12-2	38568.5	3539.5	8.17174
UBP12-2_H_R2_L1.jpg	ubp12-2	40946	3757.69	8.23156
UBP12-2_H_R2_L1.jpg	ubp12-2	8763.5	804.242	6.6899
UBP12-2_H_R2_L1.jpg	ubp12-2	12968	1190.1	7.08179
UBP12-2_H_R2_L1.jpg	ubp12-2	1403	128.756	4.85792
UBP12-2_H_R2_L1.jpg	ubp12-2	4080	374.429	5.9254
UBP12-2_H_R2_L1.jpg	ubp12-2	40928.5	3756.08	8.23113
UBP12-2_H_R2_L1.jpg	ubp12-2	59941.5	5500.94	8.61267
UBP12-2_H_R2_L1.jpg	ubp12-2	4663	427.932	6.05896
UBP12-2_H_R2_L1.jpg	ubp12-2	11745	1077.86	6.98273
UBP12-2_H_R2_L1.jpg	ubp12-2	18660	1712.46	7.44569
UBP12-2_H_R2_L1.jpg	ubp12-2	6245.5	573.16	6.35117
UBP12-2_H_R2_L1.jpg	ubp12-2	25717.5	2360.14	7.76648
UBP12-2_H_R2_L1.jpg	ubp12-2	22362	2052.2	7.62667
UBP12-2_H_R2_L1.jpg	ubp12-2	62780	5761.43	8.65894
UBP12-2_H_R2_L1.jpg	ubp12-2	69058.5	6337.62	8.75426
UBP12-2_H_R2_L1.jpg	ubp12-2	9060.5	831.498	6.72323
UBP12-2_H_R2_L1.jpg	ubp12-2	18713	1717.32	7.44852
UBP12-2_H_R2_L1.jpg	ubp12-2	5224	479.416	6.17257
UBP12-2_H_R2_L1.jpg	ubp12-2	2154	197.676	5.28663
UBP12-2_H_R2_L1.jpg	ubp12-2	6211	569.994	6.34563
UBP12-2_H_R2_L1.jpg	ubp12-2	1669.5	153.213	5.03183
UBP12-2_H_R2_L1.jpg	ubp12-2	9212	845.401	6.73981
UBP12-2_H_R2_L1.jpg	ubp12-2	34122.5	3131.48	8.04926
UBP12-2_H_R2_L1.jpg	ubp12-2	84078	7715.98	8.95105
UBP12-2_H_R2_L1.jpg	ubp12-2	46324	4251.23	8.35496
UBP12-2_H_R2_L1.jpg	ubp12-2	6307	578.804	6.36096
UBP12-2_H_R2_L1.jpg	ubp12-2	58458	5364.79	8.58761
UBP12-2_H_R2_L1.jpg	ubp12-2	4382.5	402.19	5.99692
UBP12-2_H_R2_L1.jpg	ubp12-2	3850	353.321	5.86738
UBP12-2_H_R2_L1.jpg	ubp12-2	8846	811.813	6.69927
UBP12-2_H_R2_L1.jpg	ubp12-2	7713.5	707.881	6.56228
UBP12-2_H_R2_L1.jpg	ubp12-2	87978	8073.89	8.99639
UBP12-2_H_R2_L1.jpg	ubp12-2	57156	5245.31	8.56509
UBP12-2_H_R2_L1.jpg	ubp12-2	11906.5	1092.68	6.99639
UBP12-2_H_R2_L1.jpg	ubp12-2	14904.5	1367.81	7.22097
UBP12-2_H_R2_L1.jpg	ubp12-2	28016	2571.08	7.85208
UBP12-2_H_R2_L1.jpg	ubp12-2	18971	1741	7.46222
UBP12-2_H_R2_L1.jpg	ubp12-2	14159.5	1299.44	7.16969
UBP12-2_H_R2_L1.jpg	ubp12-2	33456	3070.32	8.02954
UBP12-2_H_R2_L1.jpg	ubp12-2	9850.5	903.997	6.80683
UBP12-2_H_R2_L1.jpg	ubp12-2	4855	445.552	6.09931
UBP12-2_H_R2_L1.jpg	ubp12-2	27653	2537.76	7.83904
UBP12-2_H_R2_L1.jpg	ubp12-2	7310	670.851	6.50855
UBP12-2_H_R2_L1.jpg	ubp12-2	8785	806.215	6.69235
UBP12-2_H_R2_L1.jpg	ubp12-2	11110.5	1019.63	6.92719
UBP12-2_H_R2_L1.jpg	ubp12-2	130276	11955.7	9.38896
UBP12-2_H_R2_L1.jpg	ubp12-2	52450.5	4813.47	8.47917
UBP12-2_H_R2_L1.jpg	ubp12-2	12888.5	1182.8	7.07564
UBP12-2_H_R2_L1.jpg	ubp12-2	28010.5	2570.57	7.85188
UBP12-2_H_R2_L2.jpg	ubp12-2	8728.5	801.03	6.6859
UBP12-2_H_R2_L2.jpg	ubp12-2	6670.5	612.163	6.417
UBP12-2_H_R2_L2.jpg	ubp12-2	14280.5	1310.55	7.1782
UBP12-2_H_R2_L2.jpg	ubp12-2	21817	2002.18	7.60199
UBP12-2_H_R2_L2.jpg	ubp12-2	17606	1615.73	7.38754
UBP12-2_H_R2_L2.jpg	ubp12-2	4917.5	451.288	6.1121
UBP12-2_H_R2_L2.jpg	ubp12-2	29503.5	2707.59	7.90381
UBP12-2_H_R2_L2.jpg	ubp12-2	34176.5	3136.44	8.05084
UBP12-2_H_R2_L2.jpg	ubp12-2	2130.5	195.52	5.27566
UBP12-2_H_R2_L2.jpg	ubp12-2	1195	109.667	4.69745
UBP12-2_H_R2_L2.jpg	ubp12-2	1994.5	183.039	5.2097
UBP12-2_H_R2_L2.jpg	ubp12-2	7971	731.513	6.59511
UBP12-2_H_R2_L2.jpg	ubp12-2	9746	894.407	6.79616
UBP12-2_H_R2_L2.jpg	ubp12-2	23562	2162.33	7.67894
UBP12-2_H_R2_L2.jpg	ubp12-2	16551	1518.91	7.32575
UBP12-2_H_R2_L2.jpg	ubp12-2	5239.5	480.838	6.17553
UBP12-2_H_R2_L2.jpg	ubp12-2	51973.5	4769.7	8.47004
UBP12-2_H_R2_L2.jpg	ubp12-2	2033.5	186.618	5.22906
UBP12-2_H_R2_L2.jpg	ubp12-2	23611	2166.82	7.68102
UBP12-2_H_R2_L2.jpg	ubp12-2	60620	5563.2	8.62393
UBP12-2_H_R2_L2.jpg	ubp12-2	10108	927.629	6.83263
UBP12-2_H_R2_L2.jpg	ubp12-2	100033	9180.2	9.1248
UBP12-2_H_R2_L2.jpg	ubp12-2	67057	6153.94	8.72485
UBP12-2_H_R2_L2.jpg	ubp12-2	5843.5	536.268	6.28463
UBP12-2_H_R2_L2.jpg	ubp12-2	15490.5	1421.59	7.25953
UBP12-2_H_R2_L2.jpg	ubp12-2	3871	355.248	5.87282
UBP12-2_H_R2_L2.jpg	ubp12-2	22520.5	2066.75	7.63373
UBP12-2_H_R2_L2.jpg	ubp12-2	88676	8137.95	9.00429
UBP12-2_H_R2_L2.jpg	ubp12-2	43630.5	4004.05	8.29506
UBP12-2_H_R2_L2.jpg	ubp12-2	15945.5	1463.35	7.28848
UBP12-2_H_R2_L2.jpg	ubp12-2	65064.5	5971.08	8.69468
UBP12-2_H_R2_L2.jpg	ubp12-2	50575.5	4641.4	8.44277
UBP12-2_H_R2_L2.jpg	ubp12-2	34632	3178.24	8.06408
UBP12-2_H_R2_L2.jpg	ubp12-2	23760.5	2180.54	7.68733
UBP12-2_H_R2_L2.jpg	ubp12-2	79957.5	7337.84	8.9008
UBP12-2_H_R2_L2.jpg	ubp12-2	5185	475.836	6.16507
UBP12-2_H_R2_L2.jpg	ubp12-2	41746	3831.1	8.25091
UBP12-2_H_R2_L2.jpg	ubp12-2	23226	2131.49	7.66458
UBP12-2_H_R2_L2.jpg	ubp12-2	54896	5037.9	8.52474
UBP12-2_H_R2_L2.jpg	ubp12-2	9102	835.306	6.7278
UBP12-2_H_R2_L2.jpg	ubp12-2	17757	1629.59	7.39608
UBP12-2_H_R2_L2.jpg	ubp12-2	12867	1180.83	7.07397
UBP12-2_H_R2_L2.jpg	ubp12-2	55798	5120.68	8.54104
UBP12-2_H_R2_L2.jpg	ubp12-2	14621	1341.79	7.20176
UBP12-2_H_R2_L2.jpg	ubp12-2	5497	504.469	6.22351
UBP12-2_H_R2_L2.jpg	ubp12-2	30018	2754.8	7.9211
UBP12-2_H_R2_L2.jpg	ubp12-2	7853.5	720.729	6.58026
UBP12-2_H_R2_L2.jpg	ubp12-2	8118.5	745.049	6.61345
UBP12-2_H_R2_L2.jpg	ubp12-2	21797	2000.35	7.60108
UBP12-2_H_R2_L2.jpg	ubp12-2	49624	4554.08	8.42378
UBP12-2_H_R2_L2.jpg	ubp12-2	10781	989.391	6.89709
UBP12-2_H_R2_L2.jpg	ubp12-2	25773	2365.23	7.76863
UBP12-2_H_R2_L2.jpg	ubp12-2	39338	3610.12	8.1915
UBP12-2_H_R2_L2.jpg	ubp12-2	36011.5	3304.84	8.10314
UBP12-2_H_R2_L2.jpg	ubp12-2	5907	542.096	6.29544
UBP12-2_H_R2_L2.jpg	ubp12-2	2720	249.619	5.51994
UBP12-2_H_R2_L2.jpg	ubp12-2	9263	850.082	6.74533
UBP12-2_H_R2_L2.jpg	ubp12-2	8008	734.908	6.59975
UBP12-2_H_R2_L2.jpg	ubp12-2	111905	10269.7	9.23695
UBP12-2_H_R2_L2.jpg	ubp12-2	10987.5	1008.34	6.91606
UBP12-2_H_R2_L2.jpg	ubp12-2	17802.5	1633.77	7.39864
UBP12-2_H_R2_L2.jpg	ubp12-2	13807	1267.09	7.14448
UBP12-2_H_R2_L2.jpg	ubp12-2	10863.5	996.962	6.90471
UBP12-2_H_R2_L2.jpg	ubp12-2	46153.5	4235.59	8.35128
UBP12-2_H_R2_L2.jpg	ubp12-2	90849.5	8337.42	9.02851
UBP12-2_H_R2_L2.jpg	ubp12-2	29089	2669.55	7.88966
UBP12-2_H_R2_L2.jpg	ubp12-2	10802	991.318	6.89904
UBP12-2_H_R2_L2.jpg	ubp12-2	18451	1693.28	7.43442
UBP12-2_H_R2_L2.jpg	ubp12-2	9434.5	865.82	6.76368
UBP12-2_H_R2_L2.jpg	ubp12-2	13562	1244.61	7.12658
UBP12-2_H_R2_L2.jpg	ubp12-2	5522.5	506.809	6.22814
UBP12-2_H_R2_L2.jpg	ubp12-2	7715.5	708.065	6.56254
UBP12-2_H_R2_L2.jpg	ubp12-2	35068.5	3218.3	8.07661
UBP12-2_H_R2_L2.jpg	ubp12-2	9039	829.525	6.72085
UBP12-2_H_R2_L2.jpg	ubp12-2	13956.5	1280.81	7.15525
UBP12-2_H_R2_L2.jpg	ubp12-2	117768	10807.8	9.28802
UBP12-2_H_R2_L2.jpg	ubp12-2	38299.5	3514.81	8.16474
UBP12-2_H_R2_L2.jpg	ubp12-2	89548	8217.98	9.01408
UBP12-2_H_R2_L2.jpg	ubp12-2	15947	1463.48	7.28858
UBP12-2_H_R2_L2.jpg	ubp12-2	26985	2476.46	7.81459
UBP12-2_H_R2_L2.jpg	ubp12-2	3548	325.606	5.78569
UBP12-2_H_R2_L2.jpg	ubp12-2	11659	1069.97	6.97538
UBP12-2_H_R2_L2.jpg	ubp12-2	7322.5	671.999	6.51026
UBP12-2_H_R2_L2.jpg	ubp12-2	18745.5	1720.31	7.45026
UBP12-2_H_R2_L2.jpg	ubp12-2	21596.5	1981.95	7.59184
UBP12-2_H_R2_L2.jpg	ubp12-2	51545.5	4730.42	8.46177
UBP12-2_H_R2_L2.jpg	ubp12-2	107611	9875.65	9.19783
UBP12-2_H_R2_L2.jpg	ubp12-2	119032	10923.8	9.2987
UBP12-2_H_R2_L3.jpg	ubp12-2	11898.5	1091.95	6.99572
UBP12-2_H_R2_L3.jpg	ubp12-2	27061	2483.43	7.8174
UBP12-2_H_R2_L3.jpg	ubp12-2	13571.5	1245.48	7.12728
UBP12-2_H_R2_L3.jpg	ubp12-2	7284.5	668.511	6.50505
UBP12-2_H_R2_L3.jpg	ubp12-2	61214	5617.72	8.63368
UBP12-2_H_R2_L3.jpg	ubp12-2	60980	5596.24	8.62985
UBP12-2_H_R2_L3.jpg	ubp12-2	11191	1027.02	6.93441
UBP12-2_H_R2_L3.jpg	ubp12-2	30948	2840.15	7.95161
UBP12-2_H_R2_L3.jpg	ubp12-2	17769	1630.69	7.39676
UBP12-2_H_R2_L3.jpg	ubp12-2	64364.5	5906.84	8.68387
UBP12-2_H_R2_L3.jpg	ubp12-2	84370.5	7742.83	8.95452
UBP12-2_H_R2_L3.jpg	ubp12-2	60873.5	5586.47	8.6281
UBP12-2_H_R2_L3.jpg	ubp12-2	9526	874.218	6.77333
UBP12-2_H_R2_L3.jpg	ubp12-2	74407.5	6828.51	8.82886
UBP12-2_H_R2_L3.jpg	ubp12-2	17288.5	1586.6	7.36935
UBP12-2_H_R2_L3.jpg	ubp12-2	4481	411.229	6.01915
UBP12-2_H_R2_L3.jpg	ubp12-2	73505.5	6745.73	8.81666
UBP12-2_H_R2_L3.jpg	ubp12-2	12454	1142.93	7.04135
UBP12-2_H_R2_L3.jpg	ubp12-2	50246	4611.16	8.43624
UBP12-2_H_R2_L3.jpg	ubp12-2	23931.5	2196.24	7.6945
UBP12-2_H_R2_L3.jpg	ubp12-2	23047.5	2115.11	7.65686
UBP12-2_H_R2_L3.jpg	ubp12-2	17135.5	1572.55	7.36046
UBP12-2_H_R2_L3.jpg	ubp12-2	5946.5	545.721	6.30211
UBP12-2_H_R2_L3.jpg	ubp12-2	16958.5	1556.31	7.35007
UBP12-2_H_R2_L3.jpg	ubp12-2	90779	8330.95	9.02773
UBP12-2_H_R2_L3.jpg	ubp12-2	38237.5	3509.12	8.16312
UBP12-2_H_R2_L3.jpg	ubp12-2	44042	4041.81	8.30445
UBP12-2_H_R2_L3.jpg	ubp12-2	20898	1917.85	7.55896
UBP12-2_H_R2_L3.jpg	ubp12-2	14000.5	1284.85	7.1584
UBP12-2_H_R2_L3.jpg	ubp12-2	17785	1632.16	7.39766
UBP12-2_H_R2_L3.jpg	ubp12-2	4150	380.853	5.94241
UBP12-2_H_R2_L3.jpg	ubp12-2	4482.5	411.367	6.01949
UBP12-2_H_R2_L3.jpg	ubp12-2	14423	1323.62	7.18813
UBP12-2_H_R2_L3.jpg	ubp12-2	66661	6117.6	8.71892
UBP12-2_H_R2_L3.jpg	ubp12-2	15008.5	1377.36	7.22792
UBP12-2_H_R2_L3.jpg	ubp12-2	12304	1129.16	7.02923
UBP12-2_H_R2_L3.jpg	ubp12-2	25175.5	2310.4	7.74518
UBP12-2_H_R2_L3.jpg	ubp12-2	58444.5	5363.55	8.58738
UBP12-2_H_R2_L3.jpg	ubp12-2	29418.5	2699.79	7.90093
UBP12-2_H_R2_L3.jpg	ubp12-2	3569	327.533	5.79159
UBP12-2_H_R2_L3.jpg	ubp12-2	3780	346.897	5.84903
UBP12-2_H_R2_L3.jpg	ubp12-2	6816.5	625.562	6.43865
UBP12-2_H_R2_L3.jpg	ubp12-2	21219.5	1947.35	7.57422
UBP12-2_H_R2_L3.jpg	ubp12-2	11508.5	1056.16	6.96239
UBP12-2_H_R2_L3.jpg	ubp12-2	8783	806.031	6.69212
UBP12-2_H_R2_L3.jpg	ubp12-2	8070	740.598	6.60746
UBP12-2_H_R2_L3.jpg	ubp12-2	45251.5	4152.81	8.33154
UBP12-2_H_R2_L3.jpg	ubp12-2	190364	17470	9.76824
UBP12-2_H_R2_L3.jpg	ubp12-2	62491	5734.91	8.65433
UBP12-2_H_R2_L3.jpg	ubp12-2	8389.5	769.919	6.64629
UBP12-2_H_R2_L3.jpg	ubp12-2	29318.5	2690.61	7.89752
UBP12-2_H_R2_L3.jpg	ubp12-2	3187	292.477	5.67838
UBP12-2_H_R2_L3.jpg	ubp12-2	16635.5	1526.67	7.33084
UBP12-2_H_R2_L3.jpg	ubp12-2	51377.5	4715	8.4585
UBP12-2_H_R2_L3.jpg	ubp12-2	11968.5	1098.37	7.00158
UBP12-2_H_R2_L3.jpg	ubp12-2	17483.5	1604.49	7.38056
UBP12-2_H_R2_L3.jpg	ubp12-2	7629.5	700.172	6.55133
UBP12-2_H_R2_L3.jpg	ubp12-2	6930	635.978	6.45516
UBP12-2_H_R2_L3.jpg	ubp12-2	42281	3880.2	8.26364
UBP12-2_H_R2_L3.jpg	ubp12-2	10735	985.17	6.89281
UBP12-2_H_R2_L3.jpg	ubp12-2	60338	5537.32	8.61927
UBP12-2_H_R2_L3.jpg	ubp12-2	7329	672.595	6.51114
UBP12-2_H_R2_L3.jpg	ubp12-2	28398.5	2606.18	7.86564
UBP12-2_H_R2_L3.jpg	ubp12-2	5185	475.836	6.16507
UBP12-2_H_R2_L3.jpg	ubp12-2	68652.5	6300.36	8.74836
UBP12-2_H_R2_L3.jpg	ubp12-2	104990	9635.11	9.17317
UBP12-2_H_R2_L3.jpg	ubp12-2	58666	5383.88	8.59116
UBP12-2_H_R2_L3.jpg	ubp12-2	39206.5	3598.05	8.18815
UBP12-2_H_R2_L3.jpg	ubp12-2	83600.5	7672.16	8.94535
UBP12-2_H_R3_L1.jpg	ubp12-2	6269.5	575.363	6.355
UBP12-2_H_R3_L1.jpg	ubp12-2	11689.5	1072.77	6.978
UBP12-2_H_R3_L1.jpg	ubp12-2	3859	354.147	5.86971
UBP12-2_H_R3_L1.jpg	ubp12-2	5630.5	516.721	6.2475
UBP12-2_H_R3_L1.jpg	ubp12-2	52373	4806.36	8.4777
UBP12-2_H_R3_L1.jpg	ubp12-2	23933	2196.37	7.69456
UBP12-2_H_R3_L1.jpg	ubp12-2	20652.5	1895.32	7.54714
UBP12-2_H_R3_L1.jpg	ubp12-2	53043.5	4867.89	8.49042
UBP12-2_H_R3_L1.jpg	ubp12-2	73535	6748.43	8.81707
UBP12-2_H_R3_L1.jpg	ubp12-2	11276.5	1034.86	6.94203
UBP12-2_H_R3_L1.jpg	ubp12-2	26010.5	2387.03	7.7778
UBP12-2_H_R3_L1.jpg	ubp12-2	56578.5	5192.31	8.55493
UBP12-2_H_R3_L1.jpg	ubp12-2	72192	6625.19	8.79863
UBP12-2_H_R3_L1.jpg	ubp12-2	13027	1195.51	7.08633
UBP12-2_H_R3_L1.jpg	ubp12-2	29575	2714.15	7.90623
UBP12-2_H_R3_L1.jpg	ubp12-2	28872.5	2649.68	7.88219
UBP12-2_H_R3_L1.jpg	ubp12-2	33656.5	3088.72	8.03551
UBP12-2_H_R3_L1.jpg	ubp12-2	12337.5	1132.23	7.03195
UBP12-2_H_R3_L1.jpg	ubp12-2	23651	2170.49	7.68271
UBP12-2_H_R3_L1.jpg	ubp12-2	9280.5	851.688	6.74722
UBP12-2_H_R3_L1.jpg	ubp12-2	87875	8064.44	8.99522
UBP12-2_H_R3_L1.jpg	ubp12-2	37867	3475.12	8.15338
UBP12-2_H_R3_L1.jpg	ubp12-2	40760	3740.62	8.22701
UBP12-2_H_R3_L1.jpg	ubp12-2	61062	5603.77	8.63119
UBP12-2_H_R3_L1.jpg	ubp12-2	64845.5	5950.98	8.69131
UBP12-2_H_R3_L1.jpg	ubp12-2	7087.5	650.432	6.47764
UBP12-2_H_R3_L1.jpg	ubp12-2	40647.5	3730.29	8.22424
UBP12-2_H_R3_L1.jpg	ubp12-2	26181.5	2402.72	7.78436
UBP12-2_H_R3_L1.jpg	ubp12-2	21823.5	2002.78	7.60229
UBP12-2_H_R3_L1.jpg	ubp12-2	81403	7470.49	8.91872
UBP12-2_H_R3_L1.jpg	ubp12-2	8039.5	737.799	6.60367
UBP12-2_H_R3_L1.jpg	ubp12-2	46441	4261.97	8.35749
UBP12-2_H_R3_L1.jpg	ubp12-2	14081.5	1292.28	7.16417
UBP12-2_H_R3_L1.jpg	ubp12-2	32261	2960.65	7.99316
UBP12-2_H_R3_L1.jpg	ubp12-2	142360	13064.6	9.47766
UBP12-2_H_R3_L1.jpg	ubp12-2	14570.5	1337.16	7.1983
UBP12-2_H_R3_L1.jpg	ubp12-2	10219	937.815	6.84355
UBP12-2_H_R3_L1.jpg	ubp12-2	3424	314.226	5.75011
UBP12-2_H_R3_L1.jpg	ubp12-2	1014	93.0565	4.53321
UBP12-2_H_R3_L1.jpg	ubp12-2	44969	4126.88	8.32528
UBP12-2_H_R3_L1.jpg	ubp12-2	19747	1812.22	7.50231
UBP12-2_H_R3_L1.jpg	ubp12-2	84820.5	7784.12	8.95984
UBP12-2_H_R3_L1.jpg	ubp12-2	25264	2318.52	7.74868
UBP12-2_H_R3_L1.jpg	ubp12-2	9475.5	869.583	6.76801
UBP12-2_H_R3_L1.jpg	ubp12-2	10710.5	982.921	6.89053
UBP12-2_H_R3_L1.jpg	ubp12-2	21195	1945.1	7.57307
UBP12-2_H_R3_L1.jpg	ubp12-2	23033.5	2113.82	7.65625
UBP12-2_H_R3_L1.jpg	ubp12-2	6570	602.94	6.40182
UBP12-2_H_R3_L1.jpg	ubp12-2	51954.5	4767.95	8.46967
UBP12-2_H_R3_L1.jpg	ubp12-2	2356	216.214	5.37627
UBP12-2_H_R3_L1.jpg	ubp12-2	110066	10100.9	9.22038
UBP12-2_H_R3_L1.jpg	ubp12-2	29640.5	2720.16	7.90845
UBP12-2_H_R3_L1.jpg	ubp12-2	63673.5	5843.43	8.67307
UBP12-2_H_R3_L1.jpg	ubp12-2	10788.5	990.079	6.89779
UBP12-2_H_R3_L1.jpg	ubp12-2	30173.5	2769.07	7.92627
UBP12-2_H_R3_L1.jpg	ubp12-2	16375.5	1502.81	7.31509
UBP12-2_H_R3_L1.jpg	ubp12-2	4895	449.223	6.10752
UBP12-2_H_R3_L1.jpg	ubp12-2	72012	6608.67	8.79614
UBP12-2_H_R3_L1.jpg	ubp12-2	6687.5	613.723	6.41954
UBP12-2_H_R3_L1.jpg	ubp12-2	30567.5	2805.23	7.93924
UBP12-2_H_R3_L1.jpg	ubp12-2	8711	799.424	6.68389
UBP12-2_H_R3_L1.jpg	ubp12-2	100410	9214.8	9.12857
UBP12-2_H_R3_L1.jpg	ubp12-2	69048.5	6336.7	8.75411
UBP12-2_H_R3_L1.jpg	ubp12-2	33008	3029.2	8.01605
UBP12-2_H_R3_L1.jpg	ubp12-2	54858.5	5034.46	8.52406
UBP12-2_H_R3_L1.jpg	ubp12-2	55687	5110.49	8.53905
UBP12-2_H_R3_L1.jpg	ubp12-2	30261.5	2777.15	7.92918
UBP12-2_H_R3_L1.jpg	ubp12-2	31602.5	2900.22	7.97254
UBP12-2_H_R3_L1.jpg	ubp12-2	52162.5	4787.04	8.47367
UBP12-2_H_R3_L1.jpg	ubp12-2	128915	11830.8	9.37846
UBP12-2_H_R3_L2.jpg	ubp12-2	5836	535.58	6.28335
UBP12-2_H_R3_L2.jpg	ubp12-2	4846.5	444.772	6.09756
UBP12-2_H_R3_L2.jpg	ubp12-2	17516	1607.47	7.38242
UBP12-2_H_R3_L2.jpg	ubp12-2	32850	3014.7	8.01126
UBP12-2_H_R3_L2.jpg	ubp12-2	18760.5	1721.68	7.45106
UBP12-2_H_R3_L2.jpg	ubp12-2	100796	9250.22	9.1324
UBP12-2_H_R3_L2.jpg	ubp12-2	37078.5	3402.76	8.13234
UBP12-2_H_R3_L2.jpg	ubp12-2	233062	21388.5	9.97061
UBP12-2_H_R3_L2.jpg	ubp12-2	27286	2504.08	7.82568
UBP12-2_H_R3_L2.jpg	ubp12-2	125342	11502.9	9.35035
UBP12-2_H_R3_L2.jpg	ubp12-2	75884	6964.01	8.84851
UBP12-2_H_R3_L2.jpg	ubp12-2	65154	5979.3	8.69606
UBP12-2_H_R3_L2.jpg	ubp12-2	25908	2377.62	7.77386
UBP12-2_H_R3_L2.jpg	ubp12-2	77961	7154.62	8.87551
UBP12-2_H_R3_L2.jpg	ubp12-2	36151	3317.64	8.10701
UBP12-2_H_R3_L2.jpg	ubp12-2	8306	762.256	6.63628
UBP12-2_H_R3_L2.jpg	ubp12-2	99974	9174.79	9.12421
UBP12-2_H_R3_L2.jpg	ubp12-2	22822	2094.41	7.64703
UBP12-2_H_R3_L2.jpg	ubp12-2	108784	9983.3	9.20867
UBP12-2_H_R3_L2.jpg	ubp12-2	43079.5	3953.48	8.28235
UBP12-2_H_R3_L2.jpg	ubp12-2	67230	6169.81	8.72742
UBP12-2_H_R3_L2.jpg	ubp12-2	26926	2471.05	7.8124
UBP12-2_H_R3_L2.jpg	ubp12-2	23574.5	2163.47	7.67947
UBP12-2_H_R3_L2.jpg	ubp12-2	103822	9527.93	9.16198
UBP12-2_H_R3_L2.jpg	ubp12-2	16518	1515.89	7.32376
UBP12-2_H_R3_L2.jpg	ubp12-2	31115.5	2855.52	7.95701
UBP12-2_H_R3_L2.jpg	ubp12-2	10453.5	959.336	6.86624
UBP12-2_H_R3_L2.jpg	ubp12-2	8555	785.107	6.66582
UBP12-2_H_R3_L2.jpg	ubp12-2	90214.5	8279.14	9.02149
UBP12-2_H_R3_L2.jpg	ubp12-2	58741	5390.76	8.59244
UBP12-2_H_R3_L2.jpg	ubp12-2	31407.5	2882.32	7.96635
UBP12-2_H_R3_L2.jpg	ubp12-2	26687	2449.11	7.80348
UBP12-2_H_R3_L2.jpg	ubp12-2	6995	641.943	6.4645
UBP12-2_H_R3_L2.jpg	ubp12-2	38147.5	3500.86	8.16076
UBP12-2_H_R3_L2.jpg	ubp12-2	14892.5	1366.71	7.22016
UBP12-2_H_R3_L2.jpg	ubp12-2	76682	7037.24	8.85897
UBP12-2_H_R3_L2.jpg	ubp12-2	34063	3126.02	8.04752
UBP12-2_H_R3_L2.jpg	ubp12-2	200150	18368.1	9.81837
UBP12-2_H_R3_L2.jpg	ubp12-2	4059.5	372.547	5.92036
UBP12-2_H_R3_L2.jpg	ubp12-2	32671.5	2998.32	8.00581
UBP12-2_H_R3_L2.jpg	ubp12-2	16770	1539.01	7.3389
UBP12-2_H_R3_L2.jpg	ubp12-2	1907.5	175.055	5.1651
UBP12-2_H_R3_L2.jpg	ubp12-2	26208	2405.15	7.78537
UBP12-2_H_R3_L2.jpg	ubp12-2	13930.5	1278.43	7.15339
UBP12-2_H_R3_L2.jpg	ubp12-2	13798.5	1266.31	7.14386
UBP12-2_H_R3_L2.jpg	ubp12-2	5114.5	469.367	6.15138
UBP12-2_H_R3_L2.jpg	ubp12-2	43546	3996.29	8.29312
UBP12-2_H_R3_L2.jpg	ubp12-2	197472	18122.3	9.8049
UBP12-2_H_R3_L2.jpg	ubp12-2	3764	345.429	5.84479
UBP12-2_H_R3_L2.jpg	ubp12-2	37386.5	3431.02	8.14061
UBP12-2_H_R3_L2.jpg	ubp12-2	30890.5	2834.87	7.94975
UBP12-2_H_R3_L2.jpg	ubp12-2	36225.5	3324.48	8.10907
UBP12-2_H_R3_L2.jpg	ubp12-2	26928.5	2471.28	7.81249
UBP12-2_H_R3_L2.jpg	ubp12-2	50274.5	4613.78	8.4368
UBP12-2_H_R3_L2.jpg	ubp12-2	102998	9452.31	9.15401
UBP12-2_H_R3_L2.jpg	ubp12-2	20157.5	1849.89	7.52288
UBP12-2_H_R3_L3.jpg	ubp12-2	23744	2179.03	7.68663
UBP12-2_H_R3_L3.jpg	ubp12-2	16373.5	1502.62	7.31497
UBP12-2_H_R3_L3.jpg	ubp12-2	4648	426.555	6.05574
UBP12-2_H_R3_L3.jpg	ubp12-2	61368.5	5631.89	8.6362
UBP12-2_H_R3_L3.jpg	ubp12-2	44954	4125.51	8.32494
UBP12-2_H_R3_L3.jpg	ubp12-2	137179	12589.2	9.44059
UBP12-2_H_R3_L3.jpg	ubp12-2	23541	2160.4	7.67805
UBP12-2_H_R3_L3.jpg	ubp12-2	15425	1415.58	7.25529
UBP12-2_H_R3_L3.jpg	ubp12-2	19123	1754.95	7.4702
UBP12-2_H_R3_L3.jpg	ubp12-2	55893	5129.4	8.54274
UBP12-2_H_R3_L3.jpg	ubp12-2	38157.5	3501.78	8.16103
UBP12-2_H_R3_L3.jpg	ubp12-2	20043	1839.38	7.51718
UBP12-2_H_R3_L3.jpg	ubp12-2	101433	9308.68	9.1387
UBP12-2_H_R3_L3.jpg	ubp12-2	13022	1195.05	7.08594
UBP12-2_H_R3_L3.jpg	ubp12-2	99139	9098.16	9.11583
UBP12-2_H_R3_L3.jpg	ubp12-2	18162.5	1666.8	7.41866
UBP12-2_H_R3_L3.jpg	ubp12-2	46025.5	4223.84	8.3485
UBP12-2_H_R3_L3.jpg	ubp12-2	77602	7121.67	8.8709
UBP12-2_H_R3_L3.jpg	ubp12-2	45231.5	4150.97	8.3311
UBP12-2_H_R3_L3.jpg	ubp12-2	27009	2478.66	7.81547
UBP12-2_H_R3_L3.jpg	ubp12-2	13038	1196.52	7.08717
UBP12-2_H_R3_L3.jpg	ubp12-2	30716.5	2818.91	7.9441
UBP12-2_H_R3_L3.jpg	ubp12-2	5963.5	547.281	6.30496
UBP12-2_H_R3_L3.jpg	ubp12-2	17716	1625.83	7.39377
UBP12-2_H_R3_L3.jpg	ubp12-2	43732	4013.36	8.29738
UBP12-2_H_R3_L3.jpg	ubp12-2	10887	999.119	6.90687
UBP12-2_H_R3_L3.jpg	ubp12-2	20184.5	1852.37	7.52422
UBP12-2_H_R3_L3.jpg	ubp12-2	18367.5	1685.62	7.42989
UBP12-2_H_R3_L3.jpg	ubp12-2	29177.5	2677.67	7.8927
UBP12-2_H_R3_L3.jpg	ubp12-2	4851	445.185	6.09849
UBP12-2_H_R3_L3.jpg	ubp12-2	6759.5	620.331	6.43025
UBP12-2_H_R3_L3.jpg	ubp12-2	15014.5	1377.91	7.22832
UBP12-2_H_R3_L3.jpg	ubp12-2	34745.5	3188.65	8.06735
UBP12-2_H_R3_L3.jpg	ubp12-2	6006	551.181	6.31206
UBP12-2_H_R3_L3.jpg	ubp12-2	70211	6443.39	8.77081
UBP12-2_H_R3_L3.jpg	ubp12-2	83944.5	7703.73	8.94946
UBP12-2_H_R3_L3.jpg	ubp12-2	62932.5	5775.42	8.66137
UBP12-2_H_R3_L3.jpg	ubp12-2	51704	4744.97	8.46484
UBP12-2_H_R3_L3.jpg	ubp12-2	58579	5375.9	8.58968
UBP12-2_H_R3_L3.jpg	ubp12-2	7407	679.753	6.52173
UBP12-2_H_R3_L3.jpg	ubp12-2	31882.5	2925.91	7.98136
UBP12-2_H_R3_L3.jpg	ubp12-2	28837.5	2646.47	7.88098
UBP12-2_H_R3_L3.jpg	ubp12-2	51937	4766.35	8.46934
UBP12-2_H_R3_L3.jpg	ubp12-2	11239	1031.42	6.93869
UBP12-2_H_R3_L3.jpg	ubp12-2	20665.5	1896.51	7.54777
UBP12-2_H_R3_L3.jpg	ubp12-2	8896.5	816.447	6.70496
UBP12-2_H_R3_L3.jpg	ubp12-2	45628	4187.36	8.33983
UBP12-2_H_R3_L3.jpg	ubp12-2	91312.5	8379.91	9.03359
UBP12-2_H_R3_L3.jpg	ubp12-2	56620.5	5196.16	8.55568
UBP12-2_H_R3_L3.jpg	ubp12-2	6280	576.327	6.35667
UBP12-2_H_R3_L3.jpg	ubp12-2	11234.5	1031.01	6.93829
UBP12-2_H_R3_L3.jpg	ubp12-2	54724	5022.12	8.52161
UBP12-2_H_R3_L3.jpg	ubp12-2	73967.5	6788.13	8.82293
UBP12-2_H_R3_L3.jpg	ubp12-2	18478.5	1695.8	7.43591
UBP12-2_H_R3_L3.jpg	ubp12-2	5586	512.637	6.23957
UBP12-2_H_R3_L3.jpg	ubp12-2	31060.5	2850.48	7.95524
UBP12-2_H_R3_L3.jpg	ubp12-2	18618	1708.61	7.44343
UBP12-2_H_R3_L3.jpg	ubp12-2	10291.5	944.469	6.85062
UBP12-2_H_R3_L3.jpg	ubp12-2	29465.5	2704.1	7.90252
UBP12-2_H_R3_L3.jpg	ubp12-2	66743.5	6125.17	8.72016
UBP12-2_H_R3_L3.jpg	ubp12-2	39076.5	3586.12	8.18483
UBP12-2_H_R3_L3.jpg	ubp12-2	13824	1268.65	7.14571
UBP12-2_H_R3_L3.jpg	ubp12-2	26400	2422.77	7.79267
UBP12-2_H_R3_L3.jpg	ubp12-2	54684	5018.45	8.52088
UBP12-2_H_R3_L3.jpg	ubp12-2	14399.5	1321.47	7.1865
UBP12-2_H_R3_L3.jpg	ubp12-2	9097	834.847	6.72725
UBP12-2_H_R3_L3.jpg	ubp12-2	15181	1393.19	7.23935
UBP12-2_H_R3_L3.jpg	ubp12-2	74055.5	6796.2	8.82412
UBP12-2_H_R3_L3.jpg	ubp12-2	11995	1100.8	7.00379
UBP12-2_H_R3_L3.jpg	ubp12-2	37028	3398.12	8.13098
UBP12-2_H_R3_L3.jpg	ubp12-2	9340.5	857.194	6.75366
UBP12-2_H_R3_L3.jpg	ubp12-2	85134.5	7812.94	8.96354
UBP12-2_H_R3_L3.jpg	ubp12-2	23703.5	2175.31	7.68493
UBP12-2_H_R3_L3.jpg	ubp12-2	18303.5	1679.74	7.4264
UBP12-2_H_R3_L3.jpg	ubp12-2	37761.5	3465.44	8.15059
UBP12-2_H_R3_L3.jpg	ubp12-2	30845	2830.7	7.94828
UBP12-2_H_R3_L3.jpg	ubp12-2	12278	1126.77	7.02711
UBP12-2_H_R3_L3.jpg	ubp12-2	13849.5	1270.99	7.14755
UBP12-2_W_R1_L1.jpg	Col-0	7267	666.905	6.50265
UBP12-2_W_R1_L1.jpg	Col-0	45169.5	4145.28	8.32973
UBP12-2_W_R1_L1.jpg	Col-0	13223.5	1213.54	7.1013
UBP12-2_W_R1_L1.jpg	Col-0	17217.5	1580.08	7.36523
UBP12-2_W_R1_L1.jpg	Col-0	19112	1753.94	7.46962
UBP12-2_W_R1_L1.jpg	Col-0	32964.5	3025.21	8.01474
UBP12-2_W_R1_L1.jpg	Col-0	29476	2705.06	7.90288
UBP12-2_W_R1_L1.jpg	Col-0	5419	497.311	6.20922
UBP12-2_W_R1_L1.jpg	Col-0	117626	10794.7	9.28681
UBP12-2_W_R1_L1.jpg	Col-0	12419	1139.71	7.03853
UBP12-2_W_R1_L1.jpg	Col-0	8004.5	734.587	6.59931
UBP12-2_W_R1_L1.jpg	Col-0	40748.5	3739.56	8.22672
UBP12-2_W_R1_L1.jpg	Col-0	53394	4900.06	8.497
UBP12-2_W_R1_L1.jpg	Col-0	5048.5	463.31	6.1384
UBP12-2_W_R1_L1.jpg	Col-0	81910	7517.02	8.92493
UBP12-2_W_R1_L1.jpg	Col-0	72107.5	6617.43	8.79746
UBP12-2_W_R1_L1.jpg	Col-0	11601.5	1064.69	6.97044
UBP12-2_W_R1_L1.jpg	Col-0	28097.5	2578.56	7.85498
UBP12-2_W_R1_L1.jpg	Col-0	204426	18760.5	9.83951
UBP12-2_W_R1_L1.jpg	Col-0	15298.5	1403.97	7.24706
UBP12-2_W_R1_L1.jpg	Col-0	56357.5	5172.03	8.55102
UBP12-2_W_R1_L1.jpg	Col-0	20239.5	1857.41	7.52694
UBP12-2_W_R1_L1.jpg	Col-0	6044	554.668	6.31837
UBP12-2_W_R1_L1.jpg	Col-0	18250.5	1674.88	7.4235
UBP12-2_W_R1_L1.jpg	Col-0	71063.5	6521.62	8.78288
UBP12-2_W_R1_L1.jpg	Col-0	120847	11090.3	9.31383
UBP12-2_W_R1_L1.jpg	Col-0	19608	1799.46	7.49524
UBP12-2_W_R1_L1.jpg	Col-0	45143	4142.85	8.32914
UBP12-2_W_R1_L1.jpg	Col-0	10013.5	918.956	6.82324
UBP12-2_W_R1_L1.jpg	Col-0	36099	3312.87	8.10557
UBP12-2_W_R1_L1.jpg	Col-0	96372.5	8844.27	9.08753
UBP12-2_W_R1_L1.jpg	Col-0	30160.5	2767.88	7.92584
UBP12-2_W_R1_L1.jpg	Col-0	28747	2638.16	7.87784
UBP12-2_W_R1_L1.jpg	Col-0	37818.5	3470.67	8.1521
UBP12-2_W_R1_L1.jpg	Col-0	29019	2663.12	7.88726
UBP12-2_W_R1_L1.jpg	Col-0	27333	2508.4	7.8274
UBP12-2_W_R1_L1.jpg	Col-0	7556.5	693.473	6.54171
UBP12-2_W_R1_L1.jpg	Col-0	18003	1652.17	7.40984
UBP12-2_W_R1_L1.jpg	Col-0	53400	4900.61	8.49712
UBP12-2_W_R1_L1.jpg	Col-0	55145.5	5060.8	8.52928
UBP12-2_W_R1_L1.jpg	Col-0	45187	4146.89	8.33011
UBP12-2_W_R1_L1.jpg	Col-0	63941.5	5868.02	8.67727
UBP12-2_W_R1_L1.jpg	Col-0	8288	760.604	6.63411
UBP12-2_W_R1_L1.jpg	Col-0	9948	912.945	6.81668
UBP12-2_W_R1_L1.jpg	Col-0	46056	4226.64	8.34916
UBP12-2_W_R1_L1.jpg	Col-0	4770	437.751	6.08165
UBP12-2_W_R1_L1.jpg	Col-0	23606.5	2166.41	7.68083
UBP12-2_W_R1_L1.jpg	Col-0	17534	1609.13	7.38345
UBP12-2_W_R1_L1.jpg	Col-0	14267.5	1309.35	7.17729
UBP12-2_W_R1_L1.jpg	Col-0	56473	5182.63	8.55307
UBP12-2_W_R1_L1.jpg	Col-0	162664	14928	9.61099
UBP12-2_W_R1_L1.jpg	Col-0	12206	1120.17	7.02123
UBP12-2_W_R1_L1.jpg	Col-0	77791	7139.02	8.87333
UBP12-2_W_R1_L1.jpg	Col-0	30511	2800.05	7.93739
UBP12-2_W_R1_L1.jpg	Col-0	33210	3047.74	8.02216
UBP12-2_W_R1_L1.jpg	Col-0	8610.5	790.201	6.67229
UBP12-2_W_R1_L1.jpg	Col-0	112506	10324.9	9.24231
UBP12-2_W_R1_L1.jpg	Col-0	36458.5	3345.86	8.11548
UBP12-2_W_R1_L1.jpg	Col-0	77973.5	7155.76	8.87567
UBP12-2_W_R1_L1.jpg	Col-0	179242	16449.3	9.70804
UBP12-2_W_R1_L1.jpg	Col-0	11261	1033.44	6.94065
UBP12-2_W_R1_L1.jpg	Col-0	67878	6229.28	8.73702
UBP12-2_W_R1_L1.jpg	Col-0	11673.5	1071.3	6.97663
UBP12-2_W_R1_L1.jpg	Col-0	16361	1501.48	7.3142
UBP12-2_W_R1_L1.jpg	Col-0	24924.5	2287.36	7.73516
UBP12-2_W_R1_L1.jpg	Col-0	15076.5	1383.6	7.23244
UBP12-2_W_R1_L1.jpg	Col-0	64123	5884.68	8.68011
UBP12-2_W_R1_L1.jpg	Col-0	216547	19872.9	9.89711
UBP12-2_W_R1_L1.jpg	Col-0	14106.5	1294.58	7.16594
UBP12-2_W_R1_L1.jpg	Col-0	57146	5244.39	8.56491
UBP12-2_W_R1_L2.jpg	Col-0	47016.5	4314.79	8.3698
UBP12-2_W_R1_L2.jpg	Col-0	16441	1508.82	7.31908
UBP12-2_W_R1_L2.jpg	Col-0	47688.5	4376.46	8.38399
UBP12-2_W_R1_L2.jpg	Col-0	14321.5	1314.31	7.18107
UBP12-2_W_R1_L2.jpg	Col-0	8211.5	753.584	6.62484
UBP12-2_W_R1_L2.jpg	Col-0	4892	448.947	6.10691
UBP12-2_W_R1_L2.jpg	Col-0	10265.5	942.083	6.84809
UBP12-2_W_R1_L2.jpg	Col-0	18046.5	1656.16	7.41226
UBP12-2_W_R1_L2.jpg	Col-0	13667	1254.24	7.13429
UBP12-2_W_R1_L2.jpg	Col-0	174324	15998	9.68022
UBP12-2_W_R1_L2.jpg	Col-0	11948	1096.49	6.99987
UBP12-2_W_R1_L2.jpg	Col-0	8534	783.18	6.66336
UBP12-2_W_R1_L2.jpg	Col-0	89132.5	8179.84	9.00943
UBP12-2_W_R1_L2.jpg	Col-0	112868	10358.1	9.24552
UBP12-2_W_R1_L2.jpg	Col-0	2130	195.474	5.27543
UBP12-2_W_R1_L2.jpg	Col-0	92278.5	8468.56	9.04412
UBP12-2_W_R1_L2.jpg	Col-0	69706	6397.04	8.76359
UBP12-2_W_R1_L2.jpg	Col-0	17820	1635.37	7.39963
UBP12-2_W_R1_L2.jpg	Col-0	6642	609.548	6.41272
UBP12-2_W_R1_L2.jpg	Col-0	8330.5	764.504	6.63923
UBP12-2_W_R1_L2.jpg	Col-0	47928.5	4398.48	8.38901
UBP12-2_W_R1_L2.jpg	Col-0	104216	9564.08	9.16577
UBP12-2_W_R1_L2.jpg	Col-0	28534.5	2618.66	7.87042
UBP12-2_W_R1_L2.jpg	Col-0	27642.5	2536.8	7.83866
UBP12-2_W_R1_L2.jpg	Col-0	46532	4270.32	8.35944
UBP12-2_W_R1_L2.jpg	Col-0	9927	911.018	6.81456
UBP12-2_W_R1_L2.jpg	Col-0	4394.5	403.291	5.99966
UBP12-2_W_R1_L2.jpg	Col-0	27569.5	2530.1	7.83601
UBP12-2_W_R1_L2.jpg	Col-0	21524	1975.29	7.58847
UBP12-2_W_R1_L2.jpg	Col-0	57376.5	5265.54	8.56894
UBP12-2_W_R1_L2.jpg	Col-0	95440	8758.69	9.0778
UBP12-2_W_R1_L2.jpg	Col-0	9056	831.085	6.72273
UBP12-2_W_R1_L2.jpg	Col-0	10939.5	1003.94	6.91168
UBP12-2_W_R1_L2.jpg	Col-0	26637	2444.52	7.80161
UBP12-2_W_R1_L2.jpg	Col-0	25904.5	2377.3	7.77372
UBP12-2_W_R1_L2.jpg	Col-0	148572	13634.7	9.52037
UBP12-2_W_R1_L2.jpg	Col-0	45235	4151.29	8.33118
UBP12-2_W_R1_L2.jpg	Col-0	6511	597.526	6.3928
UBP12-2_W_R1_L2.jpg	Col-0	19828.5	1819.7	7.50642
UBP12-2_W_R1_L2.jpg	Col-0	27107.5	2487.7	7.81911
UBP12-2_W_R1_L2.jpg	Col-0	205086	18821.1	9.84273
UBP12-2_W_R1_L2.jpg	Col-0	55702	5111.87	8.53932
UBP12-2_W_R1_L2.jpg	Col-0	54332	4986.14	8.51442
UBP12-2_W_R1_L2.jpg	Col-0	65990	6056.02	8.70881
UBP12-2_W_R1_L2.jpg	Col-0	91760.5	8421.02	9.03849
UBP12-2_W_R1_L2.jpg	Col-0	87496.5	8029.71	8.9909
UBP12-2_W_R1_L2.jpg	Col-0	16697.5	1532.36	7.33456
UBP12-2_W_R1_L2.jpg	Col-0	13669	1254.43	7.13443
UBP12-2_W_R1_L2.jpg	Col-0	44321	4067.42	8.31076
UBP12-2_W_R1_L2.jpg	Col-0	107760	9889.32	9.19921
UBP12-2_W_R1_L2.jpg	Col-0	54502.5	5001.79	8.51755
UBP12-2_W_R1_L2.jpg	Col-0	66095	6065.65	8.7104
UBP12-2_W_R1_L2.jpg	Col-0	9424.5	864.903	6.76262
UBP12-2_W_R1_L2.jpg	Col-0	22771.5	2089.78	7.64481
UBP12-2_W_R1_L2.jpg	Col-0	125896	11553.7	9.35476
UBP12-2_W_R1_L3.jpg	Col-0	43352.5	3978.53	8.28867
UBP12-2_W_R1_L3.jpg	Col-0	9200.5	844.346	6.73856
UBP12-2_W_R1_L3.jpg	Col-0	2991	274.489	5.61491
UBP12-2_W_R1_L3.jpg	Col-0	81101	7442.78	8.915
UBP12-2_W_R1_L3.jpg	Col-0	5997.5	550.401	6.31065
UBP12-2_W_R1_L3.jpg	Col-0	16737.5	1536.03	7.33696
UBP12-2_W_R1_L3.jpg	Col-0	76258.5	6998.37	8.85343
UBP12-2_W_R1_L3.jpg	Col-0	88449	8117.12	9.00173
UBP12-2_W_R1_L3.jpg	Col-0	34911	3203.84	8.07211
UBP12-2_W_R1_L3.jpg	Col-0	39216.5	3598.97	8.1884
UBP12-2_W_R1_L3.jpg	Col-0	49349.5	4528.89	8.41823
UBP12-2_W_R1_L3.jpg	Col-0	32710.5	3001.9	8.007
UBP12-2_W_R1_L3.jpg	Col-0	27831	2554.1	7.84545
UBP12-2_W_R1_L3.jpg	Col-0	43102	3955.55	8.28287
UBP12-2_W_R1_L3.jpg	Col-0	49467.5	4539.72	8.42062
UBP12-2_W_R1_L3.jpg	Col-0	5513	505.938	6.22641
UBP12-2_W_R1_L3.jpg	Col-0	83175.5	7633.16	8.94026
UBP12-2_W_R1_L3.jpg	Col-0	15558	1427.78	7.26388
UBP12-2_W_R1_L3.jpg	Col-0	16458	1510.38	7.32012
UBP12-2_W_R1_L3.jpg	Col-0	48091	4413.39	8.3924
UBP12-2_W_R1_L3.jpg	Col-0	8265.5	758.539	6.63139
UBP12-2_W_R1_L3.jpg	Col-0	6222	571.004	6.3474
UBP12-2_W_R1_L3.jpg	Col-0	1724	158.214	5.06395
UBP12-2_W_R1_L3.jpg	Col-0	22071	2025.49	7.61357
UBP12-2_W_R1_L3.jpg	Col-0	4210.5	386.405	5.95689
UBP12-2_W_R1_L3.jpg	Col-0	29304.5	2689.32	7.89705
UBP12-2_W_R1_L3.jpg	Col-0	10956.5	1005.5	6.91324
UBP12-2_W_R1_L3.jpg	Col-0	9089.5	834.159	6.72642
UBP12-2_W_R1_L3.jpg	Col-0	17021	1562.05	7.35375
UBP12-2_W_R1_L3.jpg	Col-0	332060	30473.7	10.3246
UBP12-2_W_R1_L3.jpg	Col-0	89441	8208.16	9.01288
UBP12-2_W_R1_L3.jpg	Col-0	13518	1240.57	7.12333
UBP12-2_W_R1_L3.jpg	Col-0	101765	9339.15	9.14197
UBP12-2_W_R1_L3.jpg	Col-0	77766	7136.72	8.87301
UBP12-2_W_R1_L3.jpg	Col-0	40234	3692.34	8.21402
UBP12-2_W_R1_L3.jpg	Col-0	4223	387.552	5.95985
UBP12-2_W_R1_L3.jpg	Col-0	33426.5	3067.61	8.02865
UBP12-2_W_R1_L3.jpg	Col-0	6720.5	616.752	6.42447
UBP12-2_W_R1_L3.jpg	Col-0	54261	4979.63	8.51311
UBP12-2_W_R1_L3.jpg	Col-0	38894.5	3569.42	8.18016
UBP12-2_W_R1_L3.jpg	Col-0	15288.5	1403.05	7.24641
UBP12-2_W_R1_L3.jpg	Col-0	194414	17841.7	9.78929
UBP12-2_W_R1_L3.jpg	Col-0	73172	6715.12	8.81212
UBP12-2_W_R1_L3.jpg	Col-0	15493	1421.82	7.25969
UBP12-2_W_R1_L3.jpg	Col-0	52550	4822.6	8.48107
UBP12-2_W_R1_L3.jpg	Col-0	10484.5	962.181	6.8692
UBP12-2_W_R1_L3.jpg	Col-0	36901	3386.47	8.12754
UBP12-2_W_R1_L3.jpg	Col-0	47931	4398.71	8.38907
UBP12-2_W_R1_L3.jpg	Col-0	79643	7308.98	8.89686
UBP12-2_W_R1_L3.jpg	Col-0	33172.5	3044.3	8.02103
UBP12-2_W_R1_L3.jpg	Col-0	20336.5	1866.32	7.53172
UBP12-2_W_R1_L3.jpg	Col-0	7113	652.772	6.48123
UBP12-2_W_R1_L3.jpg	Col-0	41792.5	3835.37	8.25202
UBP12-2_W_R1_L3.jpg	Col-0	71004	6516.16	8.78204
UBP12-2_W_R1_L3.jpg	Col-0	12697.5	1165.27	7.06071
UBP12-2_W_R1_L3.jpg	Col-0	158246	14522.5	9.58346
UBP12-2_W_R1_L3.jpg	Col-0	40178	3687.2	8.21262
UBP12-2_W_R2_L1.jpg	Col-0	1944.5	178.45	5.18431
UBP12-2_W_R2_L1.jpg	Col-0	552	50.658	3.9251
UBP12-2_W_R2_L1.jpg	Col-0	8275.5	759.457	6.6326
UBP12-2_W_R2_L1.jpg	Col-0	6231	571.83	6.34884
UBP12-2_W_R2_L1.jpg	Col-0	39872	3659.12	8.20498
UBP12-2_W_R2_L1.jpg	Col-0	16876.5	1548.79	7.34523
UBP12-2_W_R2_L1.jpg	Col-0	35998.5	3303.64	8.10278
UBP12-2_W_R2_L1.jpg	Col-0	75437	6922.98	8.8426
UBP12-2_W_R2_L1.jpg	Col-0	21395.5	1963.5	7.58248
UBP12-2_W_R2_L1.jpg	Col-0	33111.5	3038.7	8.01919
UBP12-2_W_R2_L1.jpg	Col-0	63351.5	5813.88	8.668
UBP12-2_W_R2_L1.jpg	Col-0	9289	852.468	6.74814
UBP12-2_W_R2_L1.jpg	Col-0	1944	178.404	5.18405
UBP12-2_W_R2_L1.jpg	Col-0	59303	5442.34	8.60196
UBP12-2_W_R2_L1.jpg	Col-0	3761.5	345.199	5.84412
UBP12-2_W_R2_L1.jpg	Col-0	29182.5	2678.13	7.89287
UBP12-2_W_R2_L1.jpg	Col-0	5976	548.428	6.30706
UBP12-2_W_R2_L1.jpg	Col-0	99092	9093.84	9.11535
UBP12-2_W_R2_L1.jpg	Col-0	8729.5	801.121	6.68601
UBP12-2_W_R2_L1.jpg	Col-0	33426.5	3067.61	8.02865
UBP12-2_W_R2_L1.jpg	Col-0	87574.5	8036.86	8.99179
UBP12-2_W_R2_L1.jpg	Col-0	70195.5	6441.96	8.77059
UBP12-2_W_R2_L1.jpg	Col-0	187868	17241	9.75504
UBP12-2_W_R2_L1.jpg	Col-0	29308	2689.65	7.89716
UBP12-2_W_R2_L1.jpg	Col-0	44530	4086.6	8.31547
UBP12-2_W_R2_L1.jpg	Col-0	14673.5	1346.61	7.20535
UBP12-2_W_R2_L1.jpg	Col-0	8723.5	800.571	6.68532
UBP12-2_W_R2_L1.jpg	Col-0	21575.5	1980.02	7.59086
UBP12-2_W_R2_L1.jpg	Col-0	19164.5	1758.76	7.47236
UBP12-2_W_R2_L1.jpg	Col-0	17987.5	1650.74	7.40898
UBP12-2_W_R2_L1.jpg	Col-0	8964	822.642	6.71252
UBP12-2_W_R2_L1.jpg	Col-0	41031	3765.49	8.23363
UBP12-2_W_R2_L1.jpg	Col-0	14653	1344.73	7.20395
UBP12-2_W_R2_L1.jpg	Col-0	24752	2271.53	7.72821
UBP12-2_W_R2_L1.jpg	Col-0	35091	3220.36	8.07725
UBP12-2_W_R2_L1.jpg	Col-0	212472	19498.9	9.87811
UBP12-2_W_R2_L1.jpg	Col-0	9970	914.964	6.81888
UBP12-2_W_R2_L1.jpg	Col-0	76770.5	7045.36	8.86012
UBP12-2_W_R2_L1.jpg	Col-0	16450	1509.65	7.31963
UBP12-2_W_R2_L1.jpg	Col-0	52403.5	4809.16	8.47828
UBP12-2_W_R2_L1.jpg	Col-0	54275	4980.91	8.51337
UBP12-2_W_R2_L1.jpg	Col-0	55387	5082.96	8.53365
UBP12-2_W_R2_L1.jpg	Col-0	12980.5	1191.24	7.08275
UBP12-2_W_R2_L1.jpg	Col-0	34101.5	3129.55	8.04865
UBP12-2_W_R2_L1.jpg	Col-0	26802	2459.67	7.80778
UBP12-2_W_R2_L1.jpg	Col-0	51550.5	4730.88	8.46187
UBP12-2_W_R2_L1.jpg	Col-0	55215.5	5067.22	8.53055
UBP12-2_W_R2_L1.jpg	Col-0	74761.5	6860.99	8.83361
UBP12-2_W_R2_L1.jpg	Col-0	18978.5	1741.69	7.46261
UBP12-2_W_R2_L1.jpg	Col-0	56527.5	5187.63	8.55403
UBP12-2_W_R2_L1.jpg	Col-0	105732	9703.21	9.18021
UBP12-2_W_R2_L1.jpg	Col-0	8069	740.506	6.60733
UBP12-2_W_R2_L1.jpg	Col-0	131490	12067.1	9.39824
UBP12-2_W_R2_L1.jpg	Col-0	38845.5	3564.92	8.1789
UBP12-2_W_R2_L1.jpg	Col-0	14383	1319.95	7.18535
UBP12-2_W_R2_L1.jpg	Col-0	109359	10036.1	9.21394
UBP12-2_W_R2_L1.jpg	Col-0	70192.5	6441.69	8.77055
UBP12-2_W_R2_L1.jpg	Col-0	5778	530.257	6.27336
UBP12-2_W_R2_L1.jpg	Col-0	5413.5	496.806	6.2082
UBP12-2_W_R2_L1.jpg	Col-0	4883.5	448.167	6.10517
UBP12-2_W_R2_L1.jpg	Col-0	13981.5	1283.11	7.15704
UBP12-2_W_R2_L1.jpg	Col-0	17390.5	1595.96	7.37523
UBP12-2_W_R2_L1.jpg	Col-0	113516	10417.6	9.25125
UBP12-2_W_R2_L1.jpg	Col-0	11141	1022.43	6.92994
UBP12-2_W_R2_L1.jpg	Col-0	18189.5	1669.28	7.42015
UBP12-2_W_R2_L1.jpg	Col-0	130760	12000.1	9.39267
UBP12-2_W_R2_L1.jpg	Col-0	36760.5	3373.57	8.12373
UBP12-2_W_R2_L1.jpg	Col-0	67244	6171.1	8.72763
UBP12-2_W_R2_L1.jpg	Col-0	105268	9660.63	9.17581
UBP12-2_W_R2_L2.jpg	Col-0	11714	1075.01	6.98009
UBP12-2_W_R2_L2.jpg	Col-0	41848.5	3840.51	8.25336
UBP12-2_W_R2_L2.jpg	Col-0	11094	1018.12	6.92571
UBP12-2_W_R2_L2.jpg	Col-0	4809	441.33	6.08979
UBP12-2_W_R2_L2.jpg	Col-0	35827	3287.91	8.09801
UBP12-2_W_R2_L2.jpg	Col-0	5523	506.855	6.22823
UBP12-2_W_R2_L2.jpg	Col-0	39746	3647.56	8.20181
UBP12-2_W_R2_L2.jpg	Col-0	14567.5	1336.88	7.1981
UBP12-2_W_R2_L2.jpg	Col-0	7424.5	681.359	6.52409
UBP12-2_W_R2_L2.jpg	Col-0	70477	6467.8	8.77459
UBP12-2_W_R2_L2.jpg	Col-0	45897	4212.05	8.3457
UBP12-2_W_R2_L2.jpg	Col-0	29967.5	2750.17	7.91942
UBP12-2_W_R2_L2.jpg	Col-0	36333.5	3334.39	8.11204
UBP12-2_W_R2_L2.jpg	Col-0	18100.5	1661.11	7.41524
UBP12-2_W_R2_L2.jpg	Col-0	115704	10618.4	9.27034
UBP12-2_W_R2_L2.jpg	Col-0	61817.5	5673.1	8.64349
UBP12-2_W_R2_L2.jpg	Col-0	7581	695.722	6.54495
UBP12-2_W_R2_L2.jpg	Col-0	12751	1170.18	7.06491
UBP12-2_W_R2_L2.jpg	Col-0	21104	1936.75	7.56877
UBP12-2_W_R2_L2.jpg	Col-0	30108.5	2763.11	7.92411
UBP12-2_W_R2_L2.jpg	Col-0	72392	6643.54	8.8014
UBP12-2_W_R2_L2.jpg	Col-0	72611.5	6663.68	8.80443
UBP12-2_W_R2_L2.jpg	Col-0	17986.5	1650.65	7.40893
UBP12-2_W_R2_L2.jpg	Col-0	4747.5	435.686	6.07692
UBP12-2_W_R2_L2.jpg	Col-0	7682	704.99	6.55818
UBP12-2_W_R2_L2.jpg	Col-0	57752	5300	8.57546
UBP12-2_W_R2_L2.jpg	Col-0	50996	4679.99	8.45105
UBP12-2_W_R2_L2.jpg	Col-0	53790	4936.4	8.50439
UBP12-2_W_R2_L2.jpg	Col-0	14781	1356.48	7.21265
UBP12-2_W_R2_L2.jpg	Col-0	16627.5	1525.93	7.33036
UBP12-2_W_R2_L2.jpg	Col-0	55165.5	5062.63	8.52964
UBP12-2_W_R2_L2.jpg	Col-0	4420	405.631	6.00544
UBP12-2_W_R2_L2.jpg	Col-0	6100.5	559.853	6.32768
UBP12-2_W_R2_L2.jpg	Col-0	30475	2796.74	7.93621
UBP12-2_W_R2_L2.jpg	Col-0	10216	937.54	6.84326
UBP12-2_W_R2_L2.jpg	Col-0	170133	15613.4	9.65588
UBP12-2_W_R2_L2.jpg	Col-0	14030.5	1287.6	7.16054
UBP12-2_W_R2_L2.jpg	Col-0	44062.5	4043.69	8.30491
UBP12-2_W_R2_L2.jpg	Col-0	24785	2274.56	7.72954
UBP12-2_W_R2_L2.jpg	Col-0	42604.5	3909.89	8.27126
UBP12-2_W_R2_L2.jpg	Col-0	46070	4227.92	8.34947
UBP12-2_W_R2_L2.jpg	Col-0	21922.5	2011.87	7.60682
UBP12-2_W_R2_L2.jpg	Col-0	41970	3851.66	8.25626
UBP12-2_W_R2_L2.jpg	Col-0	153148	14054.7	9.55071
UBP12-2_W_R2_L2.jpg	Col-0	42194	3872.22	8.26158
UBP12-2_W_R2_L2.jpg	Col-0	40157	3685.28	8.2121
UBP12-2_W_R2_L2.jpg	Col-0	7668.5	703.752	6.55643
UBP12-2_W_R2_L2.jpg	Col-0	19635.5	1801.98	7.49664
UBP12-2_W_R2_L2.jpg	Col-0	25165.5	2309.48	7.74478
UBP12-2_W_R2_L2.jpg	Col-0	13098	1202.03	7.09176
UBP12-2_W_R2_L2.jpg	Col-0	39881	3659.95	8.2052
UBP12-2_W_R2_L2.jpg	Col-0	4896.5	449.36	6.10783
UBP12-2_W_R2_L2.jpg	Col-0	36131	3315.8	8.10646
UBP12-2_W_R2_L2.jpg	Col-0	69881	6413.1	8.7661
UBP12-2_W_R2_L2.jpg	Col-0	66575	6109.7	8.71763
UBP12-2_W_R2_L2.jpg	Col-0	85181.5	7817.25	8.96409
UBP12-2_W_R2_L2.jpg	Col-0	29638.5	2719.98	7.90838
UBP12-2_W_R2_L2.jpg	Col-0	59578.5	5467.62	8.6066
UBP12-2_W_R2_L2.jpg	Col-0	88690.5	8139.28	9.00446
UBP12-2_W_R2_L2.jpg	Col-0	17410	1597.75	7.37635
UBP12-2_W_R2_L2.jpg	Col-0	32178.5	2953.08	7.9906
UBP12-2_W_R2_L2.jpg	Col-0	17140	1572.97	7.36072
UBP12-2_W_R2_L2.jpg	Col-0	76826.5	7050.5	8.86085
UBP12-2_W_R2_L2.jpg	Col-0	6815.5	625.47	6.4385
UBP12-2_W_R2_L2.jpg	Col-0	50226	4609.33	8.43584
UBP12-2_W_R2_L2.jpg	Col-0	59267.5	5439.08	8.60137
UBP12-2_W_R2_L2.jpg	Col-0	180156	16533.2	9.71313
UBP12-2_W_R2_L2.jpg	Col-0	60714.5	5571.88	8.62549
UBP12-2_W_R2_L2.jpg	Col-0	62295	5716.92	8.65119
UBP12-2_W_R2_L2.jpg	Col-0	77613	7122.68	8.87104
UBP12-2_W_R2_L2.jpg	Col-0	17557	1611.24	7.38476
UBP12-2_W_R2_L2.jpg	Col-0	29433	2701.12	7.90142
UBP12-2_W_R2_L3.jpg	Col-0	4097.5	376.035	5.92968
UBP12-2_W_R2_L3.jpg	Col-0	8739	801.993	6.6871
UBP12-2_W_R2_L3.jpg	Col-0	10065.5	923.728	6.82842
UBP12-2_W_R2_L3.jpg	Col-0	8938	820.256	6.70962
UBP12-2_W_R2_L3.jpg	Col-0	19521.5	1791.52	7.49082
UBP12-2_W_R2_L3.jpg	Col-0	34008	3120.97	8.0459
UBP12-2_W_R2_L3.jpg	Col-0	59765.5	5484.78	8.60973
UBP12-2_W_R2_L3.jpg	Col-0	48254	4428.35	8.39578
UBP12-2_W_R2_L3.jpg	Col-0	46903	4304.37	8.36739
UBP12-2_W_R2_L3.jpg	Col-0	20664	1896.37	7.5477
UBP12-2_W_R2_L3.jpg	Col-0	36586.5	3357.61	8.11898
UBP12-2_W_R2_L3.jpg	Col-0	36568.5	3355.95	8.11849
UBP12-2_W_R2_L3.jpg	Col-0	3292	302.113	5.7108
UBP12-2_W_R2_L3.jpg	Col-0	8748	802.819	6.68813
UBP12-2_W_R2_L3.jpg	Col-0	16014	1469.63	7.29277
UBP12-2_W_R2_L3.jpg	Col-0	47754	4382.47	8.38537
UBP12-2_W_R2_L3.jpg	Col-0	39858	3657.84	8.20463
UBP12-2_W_R2_L3.jpg	Col-0	75864.5	6962.22	8.84825
UBP12-2_W_R2_L3.jpg	Col-0	28062	2575.3	7.85372
UBP12-2_W_R2_L3.jpg	Col-0	28805.5	2643.53	7.87987
UBP12-2_W_R2_L3.jpg	Col-0	53063.5	4869.73	8.49079
UBP12-2_W_R2_L3.jpg	Col-0	17763	1630.14	7.39642
UBP12-2_W_R2_L3.jpg	Col-0	147524	13538.5	9.5133
UBP12-2_W_R2_L3.jpg	Col-0	15018	1378.23	7.22855
UBP12-2_W_R2_L3.jpg	Col-0	238523	21889.7	9.99377
UBP12-2_W_R2_L3.jpg	Col-0	16794	1541.21	7.34033
UBP12-2_W_R2_L3.jpg	Col-0	10089	925.885	6.83075
UBP12-2_W_R2_L3.jpg	Col-0	9662.5	886.744	6.78756
UBP12-2_W_R2_L3.jpg	Col-0	21798.5	2000.49	7.60115
UBP12-2_W_R2_L3.jpg	Col-0	5421.5	497.54	6.20968
UBP12-2_W_R2_L3.jpg	Col-0	46473	4264.91	8.35818
UBP12-2_W_R2_L3.jpg	Col-0	30102	2762.51	7.9239
UBP12-2_W_R2_L3.jpg	Col-0	10554.5	968.605	6.87586
UBP12-2_W_R2_L3.jpg	Col-0	12925	1186.15	7.07847
UBP12-2_W_R2_L3.jpg	Col-0	4694	430.777	6.06559
UBP12-2_W_R2_L3.jpg	Col-0	1996.5	183.222	5.2107
UBP12-2_W_R2_L3.jpg	Col-0	27574.5	2530.56	7.8362
UBP12-2_W_R2_L3.jpg	Col-0	55149.5	5061.17	8.52935
UBP12-2_W_R2_L3.jpg	Col-0	26485.5	2430.62	7.7959
UBP12-2_W_R2_L3.jpg	Col-0	124485	11424.2	9.34349
UBP12-2_W_R2_L3.jpg	Col-0	74138.5	6803.82	8.82524
UBP12-2_W_R2_L3.jpg	Col-0	16929	1553.6	7.34833
UBP12-2_W_R2_L3.jpg	Col-0	24141.5	2215.51	7.70324
UBP12-2_W_R2_L3.jpg	Col-0	28581.5	2622.97	7.87206
UBP12-2_W_R2_L3.jpg	Col-0	12946.5	1188.12	7.08013
UBP12-2_W_R2_L3.jpg	Col-0	8866.5	813.694	6.70158
UBP12-2_W_R2_L3.jpg	Col-0	13021.5	1195.01	7.08591
UBP12-2_W_R2_L3.jpg	Col-0	6296.5	577.841	6.3593
UBP12-2_W_R2_L3.jpg	Col-0	59110	5424.63	8.5987
UBP12-2_W_R2_L3.jpg	Col-0	141564	12991.6	9.47206
UBP12-2_W_R2_L3.jpg	Col-0	62497	5735.46	8.65442
UBP12-2_W_R2_L3.jpg	Col-0	31329	2875.12	7.96385
UBP12-2_W_R2_L3.jpg	Col-0	29260	2685.24	7.89553
UBP12-2_W_R2_L3.jpg	Col-0	12682.5	1163.9	7.05953
UBP12-2_W_R2_L3.jpg	Col-0	22670.5	2080.51	7.64037
UBP12-2_W_R2_L3.jpg	Col-0	61103.5	5607.57	8.63187
UBP12-2_W_R2_L3.jpg	Col-0	9326	855.863	6.75211
UBP12-2_W_R2_L3.jpg	Col-0	70471.5	6467.29	8.77451
UBP12-2_W_R2_L3.jpg	Col-0	4370.5	401.088	5.99418
UBP12-2_W_R2_L3.jpg	Col-0	21602	1982.45	7.59209
UBP12-2_W_R2_L3.jpg	Col-0	86116.5	7903.06	8.97501
UBP12-2_W_R2_L3.jpg	Col-0	6458	592.662	6.38462
UBP12-2_W_R2_L3.jpg	Col-0	3173.5	291.238	5.67414
UBP12-2_W_R2_L3.jpg	Col-0	36654.5	3363.85	8.12084
UBP12-2_W_R2_L3.jpg	Col-0	101082	9276.47	9.13524
UBP12-2_W_R2_L3.jpg	Col-0	63805	5855.5	8.67514
UBP12-2_W_R2_L3.jpg	Col-0	54941	5042.03	8.52556
UBP12-2_W_R2_L3.jpg	Col-0	68195.5	6258.42	8.74168
UBP12-2_W_R2_L3.jpg	Col-0	57945.5	5317.76	8.57881
UBP12-2_W_R2_L3.jpg	Col-0	136160	12495.6	9.43314
UBP12-2_W_R2_L3.jpg	Col-0	16226	1489.09	7.30592
UBP12-2_W_R2_L3.jpg	Col-0	41722.5	3828.95	8.25034
UBP12-2_W_R2_L3.jpg	Col-0	20817	1910.41	7.55507
UBP12-2_W_R2_L3.jpg	Col-0	53447.5	4904.97	8.498
UBP12-2_W_R3_L1.jpg	Col-0	52118	4782.96	8.47281
UBP12-2_W_R3_L1.jpg	Col-0	28194	2587.41	7.85841
UBP12-2_W_R3_L1.jpg	Col-0	10125	929.189	6.83431
UBP12-2_W_R3_L1.jpg	Col-0	25863	2373.49	7.77212
UBP12-2_W_R3_L1.jpg	Col-0	19826	1819.47	7.5063
UBP12-2_W_R3_L1.jpg	Col-0	72399.5	6644.23	8.8015
UBP12-2_W_R3_L1.jpg	Col-0	58235.5	5344.37	8.5838
UBP12-2_W_R3_L1.jpg	Col-0	18069	1658.22	7.4135
UBP12-2_W_R3_L1.jpg	Col-0	12646	1160.55	7.05665
UBP12-2_W_R3_L1.jpg	Col-0	15887	1457.98	7.28481
UBP12-2_W_R3_L1.jpg	Col-0	65293.5	5992.1	8.6982
UBP12-2_W_R3_L1.jpg	Col-0	10772.5	988.611	6.8963
UBP12-2_W_R3_L1.jpg	Col-0	22559.5	2070.32	7.63546
UBP12-2_W_R3_L1.jpg	Col-0	68842	6317.75	8.75112
UBP12-2_W_R3_L1.jpg	Col-0	4482	411.321	6.01937
UBP12-2_W_R3_L1.jpg	Col-0	28674	2631.46	7.8753
UBP12-2_W_R3_L1.jpg	Col-0	17930.5	1645.51	7.40581
UBP12-2_W_R3_L1.jpg	Col-0	98083	9001.25	9.10512
UBP12-2_W_R3_L1.jpg	Col-0	24703	2267.04	7.72623
UBP12-2_W_R3_L1.jpg	Col-0	13847.5	1270.81	7.14741
UBP12-2_W_R3_L1.jpg	Col-0	39154.5	3593.28	8.18682
UBP12-2_W_R3_L1.jpg	Col-0	66485	6101.44	8.71628
UBP12-2_W_R3_L1.jpg	Col-0	18328	1681.99	7.42773
UBP12-2_W_R3_L1.jpg	Col-0	12906	1184.41	7.077
UBP12-2_W_R3_L1.jpg	Col-0	21612.5	1983.42	7.59258
UBP12-2_W_R3_L1.jpg	Col-0	65351.5	5997.42	8.69908
UBP12-2_W_R3_L1.jpg	Col-0	34604.5	3175.72	8.06329
UBP12-2_W_R3_L1.jpg	Col-0	12289.5	1127.83	7.02805
UBP12-2_W_R3_L1.jpg	Col-0	10228.5	938.687	6.84448
UBP12-2_W_R3_L1.jpg	Col-0	9478	869.813	6.76828
UBP12-2_W_R3_L1.jpg	Col-0	82928.5	7610.49	8.93728
UBP12-2_W_R3_L1.jpg	Col-0	38824.5	3562.99	8.17836
UBP12-2_W_R3_L1.jpg	Col-0	28560	2621	7.87131
UBP12-2_W_R3_L1.jpg	Col-0	23664	2171.69	7.68326
UBP12-2_W_R3_L1.jpg	Col-0	44435	4077.88	8.31333
UBP12-2_W_R3_L1.jpg	Col-0	6127	562.285	6.33201
UBP12-2_W_R3_L1.jpg	Col-0	17836	1636.84	7.40052
UBP12-2_W_R3_L1.jpg	Col-0	20953	1922.89	7.56159
UBP12-2_W_R3_L1.jpg	Col-0	39658	3639.48	8.1996
UBP12-2_W_R3_L1.jpg	Col-0	74028	6793.68	8.82375
UBP12-2_W_R3_L1.jpg	Col-0	15832	1452.93	7.28134
UBP12-2_W_R3_L1.jpg	Col-0	48873.5	4485.21	8.40854
UBP12-2_W_R3_L1.jpg	Col-0	88262	8099.96	8.99961
UBP12-2_W_R3_L1.jpg	Col-0	33519.5	3076.14	8.03143
UBP12-2_W_R3_L1.jpg	Col-0	48432.5	4444.73	8.39948
UBP12-2_W_R3_L1.jpg	Col-0	19902	1826.44	7.51012
UBP12-2_W_R3_L1.jpg	Col-0	8051.5	738.9	6.60516
UBP12-2_W_R3_L1.jpg	Col-0	15785	1448.62	7.27836
UBP12-2_W_R3_L1.jpg	Col-0	11304.5	1037.43	6.94451
UBP12-2_W_R3_L1.jpg	Col-0	9600	881.009	6.78107
UBP12-2_W_R3_L1.jpg	Col-0	98695.5	9057.46	9.11134
UBP12-2_W_R3_L1.jpg	Col-0	22626.5	2076.47	7.63843
UBP12-2_W_R3_L1.jpg	Col-0	36786.5	3375.96	8.12444
UBP12-2_W_R3_L1.jpg	Col-0	48061.5	4410.69	8.39179
UBP12-2_W_R3_L1.jpg	Col-0	62405.5	5727.06	8.65296
UBP12-2_W_R3_L1.jpg	Col-0	10323.5	947.406	6.85373
UBP12-2_W_R3_L1.jpg	Col-0	20472.5	1878.8	7.53839
UBP12-2_W_R3_L1.jpg	Col-0	28752.5	2638.67	7.87803
UBP12-2_W_R3_L1.jpg	Col-0	16641	1527.17	7.33117
UBP12-2_W_R3_L1.jpg	Col-0	30835	2829.78	7.94795
UBP12-2_W_R3_L1.jpg	Col-0	106491	9772.86	9.18736
UBP12-2_W_R3_L1.jpg	Col-0	16417.5	1506.66	7.31765
UBP12-2_W_R3_L1.jpg	Col-0	50598.5	4643.51	8.44323
UBP12-2_W_R3_L1.jpg	Col-0	9593.5	880.412	6.78039
UBP12-2_W_R3_L1.jpg	Col-0	6939.5	636.85	6.45653
UBP12-2_W_R3_L1.jpg	Col-0	12744	1169.54	7.06436
UBP12-2_W_R3_L1.jpg	Col-0	79817.5	7324.99	8.89905
UBP12-2_W_R3_L1.jpg	Col-0	36012.5	3304.93	8.10317
UBP12-2_W_R3_L1.jpg	Col-0	31477	2888.7	7.96856
UBP12-2_W_R3_L1.jpg	Col-0	121772	11175.2	9.32145
UBP12-2_W_R3_L1.jpg	Col-0	13070.5	1199.5	7.08966
UBP12-2_W_R3_L1.jpg	Col-0	6217	570.545	6.34659
UBP12-2_W_R3_L1.jpg	Col-0	24319	2231.8	7.71056
UBP12-2_W_R3_L1.jpg	Col-0	85975.5	7890.12	8.97337
UBP12-2_W_R3_L1.jpg	Col-0	60950	5593.49	8.62936
UBP12-2_W_R3_L1.jpg	Col-0	18219	1671.99	7.42177
UBP12-2_W_R3_L1.jpg	Col-0	46753	4290.6	8.36418
UBP12-2_W_R3_L2.jpg	Col-0	17861	1639.13	7.40192
UBP12-2_W_R3_L2.jpg	Col-0	46229.5	4242.56	8.35292
UBP12-2_W_R3_L2.jpg	Col-0	10992.5	1008.8	6.91652
UBP12-2_W_R3_L2.jpg	Col-0	16090.5	1476.65	7.29753
UBP12-2_W_R3_L2.jpg	Col-0	25457	2336.23	7.7563
UBP12-2_W_R3_L2.jpg	Col-0	26769.5	2456.68	7.80657
UBP12-2_W_R3_L2.jpg	Col-0	60354.5	5538.84	8.61954
UBP12-2_W_R3_L2.jpg	Col-0	73659.5	6759.86	8.81876
UBP12-2_W_R3_L2.jpg	Col-0	5860	537.782	6.28745
UBP12-2_W_R3_L2.jpg	Col-0	30355	2785.73	7.93227
UBP12-2_W_R3_L2.jpg	Col-0	22783.5	2090.88	7.64534
UBP12-2_W_R3_L2.jpg	Col-0	39847.5	3656.87	8.20436
UBP12-2_W_R3_L2.jpg	Col-0	17379	1594.9	7.37457
UBP12-2_W_R3_L2.jpg	Col-0	84919	7793.16	8.961
UBP12-2_W_R3_L2.jpg	Col-0	2497.5	229.2	5.43459
UBP12-2_W_R3_L2.jpg	Col-0	101940	9355.21	9.14369
UBP12-2_W_R3_L2.jpg	Col-0	21053.5	1932.12	7.56637
UBP12-2_W_R3_L2.jpg	Col-0	7468.5	685.397	6.53
UBP12-2_W_R3_L2.jpg	Col-0	40176.5	3687.07	8.21259
UBP12-2_W_R3_L2.jpg	Col-0	88906	8159.06	9.00688
UBP12-2_W_R3_L2.jpg	Col-0	6108.5	560.588	6.32899
UBP12-2_W_R3_L2.jpg	Col-0	49359.5	4529.81	8.41843
UBP12-2_W_R3_L2.jpg	Col-0	80009.5	7342.61	8.90145
UBP12-2_W_R3_L2.jpg	Col-0	8147	747.664	6.61695
UBP12-2_W_R3_L2.jpg	Col-0	35794	3284.88	8.09708
UBP12-2_W_R3_L2.jpg	Col-0	29857	2740.03	7.91572
UBP12-2_W_R3_L2.jpg	Col-0	4328.5	397.234	5.98453
UBP12-2_W_R3_L2.jpg	Col-0	6411.5	588.394	6.3774
UBP12-2_W_R3_L2.jpg	Col-0	2094.5	192.216	5.25862
UBP12-2_W_R3_L2.jpg	Col-0	18293.5	1678.83	7.42585
UBP12-2_W_R3_L2.jpg	Col-0	29554.5	2712.27	7.90554
UBP12-2_W_R3_L2.jpg	Col-0	12576	1154.12	7.05109
UBP12-2_W_R3_L2.jpg	Col-0	80951	7429.01	8.91315
UBP12-2_W_R3_L2.jpg	Col-0	10225.5	938.412	6.84419
UBP12-2_W_R3_L2.jpg	Col-0	6141	563.57	6.33429
UBP12-2_W_R3_L2.jpg	Col-0	21309	1955.56	7.57843
UBP12-2_W_R3_L2.jpg	Col-0	69699	6396.4	8.76349
UBP12-2_W_R3_L2.jpg	Col-0	13223	1213.5	7.10126
UBP12-2_W_R3_L2.jpg	Col-0	18976.5	1741.51	7.46251
UBP12-2_W_R3_L2.jpg	Col-0	81073.5	7440.26	8.91466
UBP12-2_W_R3_L2.jpg	Col-0	31337.5	2875.9	7.96412
UBP12-2_W_R3_L2.jpg	Col-0	80783	7413.6	8.91107
UBP12-2_W_R3_L2.jpg	Col-0	6610.5	606.657	6.40796
UBP12-2_W_R3_L2.jpg	Col-0	9557.5	877.108	6.77663
UBP12-2_W_R3_L2.jpg	Col-0	40495	3716.3	8.22048
UBP12-2_W_R3_L2.jpg	Col-0	37640.5	3454.33	8.14738
UBP12-2_W_R3_L2.jpg	Col-0	3860	354.239	5.86997
UBP12-2_W_R3_L2.jpg	Col-0	76639	7033.29	8.85841
UBP12-2_W_R3_L2.jpg	Col-0	8476	777.857	6.65654
UBP12-2_W_R3_L2.jpg	Col-0	153210	14060.3	9.55111
UBP12-2_W_R3_L2.jpg	Col-0	22081	2026.41	7.61402
UBP12-2_W_R3_L2.jpg	Col-0	73685	6762.2	8.8191
UBP12-2_W_R3_L2.jpg	Col-0	22394	2055.14	7.6281
UBP12-2_W_R3_L2.jpg	Col-0	18391	1687.77	7.43117
UBP12-2_W_R3_L2.jpg	Col-0	5286.5	485.151	6.18446
UBP12-2_W_R3_L2.jpg	Col-0	87274	8009.29	8.98836
UBP12-2_W_R3_L2.jpg	Col-0	86431.5	7931.97	8.97866
UBP12-2_W_R3_L2.jpg	Col-0	37727	3462.27	8.14968
UBP12-2_W_R3_L2.jpg	Col-0	42946	3941.23	8.27925
UBP12-2_W_R3_L2.jpg	Col-0	14133	1297.01	7.16782
UBP12-2_W_R3_L2.jpg	Col-0	14318.5	1314.03	7.18086
UBP12-2_W_R3_L2.jpg	Col-0	20965	1923.99	7.56216
UBP12-2_W_R3_L2.jpg	Col-0	195958	17983.4	9.7972
UBP12-2_W_R3_L2.jpg	Col-0	76451.5	7016.09	8.85596
UBP12-2_W_R3_L2.jpg	Col-0	35684.5	3274.83	8.09402
UBP12-2_W_R3_L2.jpg	Col-0	37152	3409.5	8.13432
UBP12-2_W_R3_L2.jpg	Col-0	108289	9937.87	9.20411
UBP12-2_W_R3_L3.jpg	Col-0	36809.5	3378.07	8.12506
UBP12-2_W_R3_L3.jpg	Col-0	20933.5	1921.1	7.56066
UBP12-2_W_R3_L3.jpg	Col-0	16181.5	1485	7.30317
UBP12-2_W_R3_L3.jpg	Col-0	10764	987.831	6.89551
UBP12-2_W_R3_L3.jpg	Col-0	12597	1156.05	7.05276
UBP12-2_W_R3_L3.jpg	Col-0	31872.5	2924.99	7.98105
UBP12-2_W_R3_L3.jpg	Col-0	9880.5	906.751	6.80987
UBP12-2_W_R3_L3.jpg	Col-0	10599.5	972.735	6.88011
UBP12-2_W_R3_L3.jpg	Col-0	44004	4038.32	8.30358
UBP12-2_W_R3_L3.jpg	Col-0	66110	6067.03	8.71062
UBP12-2_W_R3_L3.jpg	Col-0	23146.5	2124.19	7.66115
UBP12-2_W_R3_L3.jpg	Col-0	22731.5	2086.11	7.64306
UBP12-2_W_R3_L3.jpg	Col-0	9340	857.148	6.75361
UBP12-2_W_R3_L3.jpg	Col-0	25820	2369.55	7.77045
UBP12-2_W_R3_L3.jpg	Col-0	31659	2905.4	7.97433
UBP12-2_W_R3_L3.jpg	Col-0	14872.5	1364.88	7.21882
UBP12-2_W_R3_L3.jpg	Col-0	43762.5	4016.16	8.29808
UBP12-2_W_R3_L3.jpg	Col-0	56383	5174.37	8.55147
UBP12-2_W_R3_L3.jpg	Col-0	60048	5510.71	8.61445
UBP12-2_W_R3_L3.jpg	Col-0	37368	3429.33	8.14012
UBP12-2_W_R3_L3.jpg	Col-0	19129.5	1755.55	7.47054
UBP12-2_W_R3_L3.jpg	Col-0	26546.5	2436.22	7.7982
UBP12-2_W_R3_L3.jpg	Col-0	125812	11546	9.35409
UBP12-2_W_R3_L3.jpg	Col-0	25077.5	2301.41	7.74128
UBP12-2_W_R3_L3.jpg	Col-0	39748.5	3647.79	8.20188
UBP12-2_W_R3_L3.jpg	Col-0	108804	9985.13	9.20885
UBP12-2_W_R3_L3.jpg	Col-0	143746	13191.8	9.48735
UBP12-2_W_R3_L3.jpg	Col-0	23655.5	2170.91	7.6829
UBP12-2_W_R3_L3.jpg	Col-0	52468	4815.08	8.47951
UBP12-2_W_R3_L3.jpg	Col-0	37636.5	3453.97	8.14728
UBP12-2_W_R3_L3.jpg	Col-0	47644.5	4372.42	8.38307
UBP12-2_W_R3_L3.jpg	Col-0	87428	8023.42	8.99012
UBP12-2_W_R3_L3.jpg	Col-0	7158	656.902	6.48753
UBP12-2_W_R3_L3.jpg	Col-0	28409	2607.14	7.86601
UBP12-2_W_R3_L3.jpg	Col-0	20829	1911.51	7.55565
UBP12-2_W_R3_L3.jpg	Col-0	131549	12072.5	9.39868
UBP12-2_W_R3_L3.jpg	Col-0	31771	2915.68	7.97786
UBP12-2_W_R3_L3.jpg	Col-0	10233.5	939.146	6.84497
UBP12-2_W_R3_L3.jpg	Col-0	14183.5	1301.64	7.17138
UBP12-2_W_R3_L3.jpg	Col-0	10413	955.619	6.86236
UBP12-2_W_R3_L3.jpg	Col-0	16852.5	1546.58	7.3438
UBP12-2_W_R3_L3.jpg	Col-0	17698	1624.18	7.39276
UBP12-2_W_R3_L3.jpg	Col-0	22220	2039.17	7.6203
UBP12-2_W_R3_L3.jpg	Col-0	1315	120.68	4.79314
UBP12-2_W_R3_L3.jpg	Col-0	4466.5	409.898	6.01591
UBP12-2_W_R3_L3.jpg	Col-0	7467	685.26	6.5298
UBP12-2_W_R3_L3.jpg	Col-0	40603.5	3726.25	8.22316
UBP12-2_W_R3_L3.jpg	Col-0	6121	561.735	6.33103
UBP12-2_W_R3_L3.jpg	Col-0	18865	1731.27	7.45661
UBP12-2_W_R3_L3.jpg	Col-0	41013	3763.83	8.23319
UBP12-2_W_R3_L3.jpg	Col-0	74254.5	6814.46	8.8268
UBP12-2_W_R3_L3.jpg	Col-0	13323	1222.67	7.1088
UBP12-2_W_R3_L3.jpg	Col-0	11601.5	1064.69	6.97044
UBP12-2_W_R3_L3.jpg	Col-0	9699	890.094	6.79133
UBP12-2_W_R3_L3.jpg	Col-0	72699	6671.71	8.80563
UBP12-2_W_R3_L3.jpg	Col-0	98482.5	9037.91	9.10918
UBP12-2_W_R3_L3.jpg	Col-0	98152	9007.58	9.10582
UBP12-2_W_R3_L3.jpg	Col-0	56241	5161.33	8.54895
UBP12-2_W_R3_L3.jpg	Col-0	26537.5	2435.39	7.79786
UBP12-2_W_R3_L3.jpg	Col-0	49567	4548.85	8.42263
UBP12-2_W_R3_L3.jpg	Col-0	38918	3571.57	8.18076
UBP12-2_W_R3_L3.jpg	Col-0	30334	2783.8	7.93157
UBP12-2_W_R3_L3.jpg	Col-0	125232	11492.8	9.34947
UBP12-2_W_R3_L3.jpg	Col-0	12420	1139.8	7.03861
UBP12-2_W_R3_L3.jpg	Col-0	30201.5	2771.64	7.9272
UBP12-2_W_R3_L3.jpg	Col-0	175820	16135.3	9.68877
UBP12-2_W_R3_L3.jpg	Col-0	311620	28597.9	10.2611

## Sheet: F2D Rel frequency CA 35S-UBPs
LN cell area																	Relative frequency cell area																	Statistical analysis
Col-0 R1	Col-0 R2	Col-0 R3	35S::UBP12_3.1 R1	35S::UBP12_3.1 R2	35S::UBP12_3.1 R3	35S::UBP12_3.2 R1	35S::UBP12_3.2 R2	35S::UBP12_3.2 R3	35S::UBP13_1.1 R1	35S::UBP13_1.1 R2	35S::UBP13_1.1 R3	35S::UBP13_2.3 R1	35S::UBP13_2.3 R2	35S::UBP13_2.3 R3			Bin center	Col-0			35S::UBP12_3.1			35S::UBP12_3.2			35S::UBP13_1.1			35S::UBP13_2.3
4.8183	4.28041	7.15213	5.78258	7.02226	5.50661	6.96573	4.81867	5.00604	4.14824	7.7	2.85857	4.43211	7.61904	6.86375			2,5	0.0031746	0.0025641	0.00268817	0.0189474	0.0219561	0.0128205	0.00897666	0.0123762	0	0.017284	0.0228571	0.020202	0.01766	0.0187793	0.0137931		Table Analyzed	Average 3 repeats Cell distribution LN (bin = 1 from 1,5)
5.59635	7.13136	6.33429	4.77627	4.15762	6.13184	6.73049	5.29219	4.05806	3.4449	5.30594	3.01872	5.50138	6.41279	4.19703			3,5	0.0253968	0.0307692	0.0188172	0.105263	0.0778443	0.0769231	0.059246	0.0618812	0.0672854	0.0345679	0.0828571	0.0707071	0.0794702	0.117371	0.131034
6.14462	7.57028	5.23225	3.34327	5.1609	7.63475	7.72805	3.5358	6.97208	4.42389	8.58851	4.93042	4.18383	4.50774	6.1992			4,5	0.0761905	0.105128	0.0913978	0.153684	0.153693	0.152244	0.123878	0.143564	0.155452	0.133333	0.137143	0.15404	0.15894	0.178404	0.16092		Two-way ANOVA	Ordinary
6.22985	7.40257	6.6508	7.52854	5.96904	6.56059	7.73329	3.82816	6.7717	7.1995	5.17527	5.13692	3.43015	5.24516	5.78906			5,5	0.206349	0.258974	0.241935	0.221053	0.213573	0.224359	0.217235	0.242574	0.262181	0.22963	0.188571	0.242424	0.262693	0.215962	0.243678		Alpha	0.05
7.42281	5.45775	8.16292	6.09405	4.40781	4.83302	7.30135	3.1837	5.6724	5.81101	7.13451	6.39953	7.29389	5.47942	5.27072			6,5	0.257143	0.233333	0.247312	0.246316	0.233533	0.288462	0.251346	0.267327	0.218097	0.269136	0.251429	0.227273	0.258278	0.248826	0.225287
6.87239	5.94638	5.93782	5.88297	4.27212	5.66066	5.94157	5.92699	7.42899	6.02216	7.49279	5.5289	5.47501	6.05326	5.43659			7,5	0.288889	0.284615	0.311828	0.24	0.217565	0.214744	0.280072	0.225248	0.25058	0.269136	0.277143	0.239899	0.200883	0.204225	0.195402		Source of Variation	% of total variation	P value	P value summary	Significant?
7.50433	4.6064	7.42604	6.7397	8.2254	3.87017	8.39576	4.31719	5.62655	6.77207	6.96322	7.55026	7.26481	6.70687	7.538			8,5	0.136508	0.0846154	0.0860215	0.00842105	0.0778443	0.0240385	0.059246	0.0470297	0.0464037	0.0469136	0.04	0.0454545	0.0220751	0.0164319	0.0298851		Interaction	5.192	<0,0001	****	Yes
7.38005	6.00556	7.38942	7.53868	7.09945	4.19149	8.27285	3.26404	3.94837	4.37601	5.67146	6.44879	5.45677	7.06146	7.15087																				Row Factor	92.51	<0,0001	****	Yes
7.84798	5.79467	4.83338	7.44378	4.37254	6.86696	4.24289	5.36903	3.844	7.11318	5.63248	4.30982	6.38214	7.79877	4.0209																				Column Factor	0.001038	0.9999	ns	No
5.73437	7.4288	6.04905	5.28663	6.70079	1.88822	7.64963	5.44098	4.54107	5.13422	4.11058	5.70821	5.86139	7.87533	7.66378
5.47961	5.13422	5.64326	3.62404	5.54964	4.67288	6.38988	5.97745	6.02416	6.36555	2.68045	5.02642	4.67545	6.88087	8.13988																				ANOVA table	SS	DF	MS	F (DFn, DFd)	P value
6.26903	7.03877	7.75044	3.51555	6.85518	7.19031	6.06697	7.55382	5.34633	4.85756	2.6773	5.18508	5.36431	6.9548	6.63006																				Interaction	0.05084	24	0.002118	F (24, 70) = 6,595	P<0,0001
5.19046	8.22788	5.71504	6.89987	2.78487	5.14444	7.28156	7.67675	4.29679	7.4751	6.11485	7.32475	7.51659	2.7877	6.69053																				Row Factor	0.9059	6	0.151	F (6, 70) = 470,1	P<0,0001
7.6548	7.8402	6.24724	4.96014	3.09842	7.69119	7.26101	5.4215	5.26552	6.14599	2.73848	6.03991	8.00546	2.96814	5.63067																				Column Factor	1.016e-05	4	2.54e-06	F (4, 70) = 0,007909	P=0,9999
5.99384	5.70149	4.85399	7.42232	6.21995	7.13922	3.1988	6.44421	5.10654	8.20649	7.09751	4.98335	7.44512	7.54549	5.01064																				Residual	0.02248	70	0.0003212
5.87553	6.73987	5.20063	5.589	7.12713	5.76992	8.56353	6.04122	6.76357	4.9707	5.45048	6.43821	6.5842	6.71969	5.71686
6.51046	5.91307	7.40734	4.60594	4.6477	5.48876	5.45775	7.20473	6.87529	7.11854	8.05958	6.1376	7.11407	7.39106	8.20499
6.78362	4.28168	4.67545	3.40304	5.60365	6.4464	5.93151	5.81554	6.46793	7.77324	6.95834	5.92785	6.68653	7.47853	5.42089																				Within each row, compare columns (simple effects within rows)
6.85392	5.61156	6.80921	6.50636	6.91611	6.5802	5.33112	7.28436	7.50882	6.92187	6.60454	6.15529	6.55401	4.58556	6.54118
5.00019	6.42231	8.28311	5.75681	5.07434	6.8477	4.23295	7.31841	7.32798	5.53635	6.77391	7.09024	5.33864	6.57714	4.92843																				Number of families	7
5.20769	7.7164	6.4741	6.02859	6.66944	6.29222	5.2766	6.73889	4.35972	7.10232	7.88793	5.33245	3.5264	7.39918	6.68756																				Number of comparisons per family	4
7.35832	7.83333	5.40245	6.53114	5.7523	7.33537	7.23459	5.40884	6.91429	6.88721	6.75404	8.25558	3.96331	5.58574	7.25953																				Alpha	0.05
6.80688	8.00764	6.50553	7.32994	5.65071	7.10338	7.9715	7.61813	3.7085	7.61829	8.07059	4.91337	3.63862	5.26789	4.47116
8.71155	8.03079	3.56739	6.92047	7.43288	4.60869	5.74777	6.78362	5.57431	5.93915	6.69241	2.8373	7.40536	4.02501	6.10619																				Dunnett's multiple comparisons test	Mean Diff,	95,00% CI of diff,	Significant?	Summary	Adjusted P Value
6.48242	6.52953	3.86922	7.38996	7.20562	5.37945	7.00534	5.43139	6.53027	5.58436	4.80298	7.40795	6.42395	5.14364	6.62837
5.13368	5.09592	6.40379	6.31903	8.21691	7.60919	6.31605	5.57274	4.68142	4.33898	7.93872	2.68984	5.02883	3.43902	3.01872																				2,5
6.35667	5.45461	7.6416	5.28895	7.36445	5.61039	7.52872	7.03885	4.67759	7.88487	7.82839	6.66336	6.88355	5.55905	2.93212																				Col-0 vs. 35S::UBP12_3.1	-0.0151	-0,05167 to 0,02147	No	ns	0.6899
7.84213	7.24349	7.92288	4.81309	3.57513	3.40913	6.97315	6.3502	3.56609	5.84717	4.80185	7.20074	6.37513	7.4448	4.24684																				Col-0 vs. 35S::UBP12_3.2	-0.004309	-0,04088 to 0,03226	No	ns	0.995
4.54741	8.57863	5.48458	3.21735	5.72393	4.00011	7.96482	8.10835	3.68229	5.00666	6.40014	7.74886	6.27854	4.66384	7.32442																				Col-0 vs. 35S::UBP13_1.1	-0.01731	-0,05387 to 0,01926	No	ns	0.5835
7.13994	5.78385	6.85774	4.82052	8.2617	4.26763	5.96528	7.28933	7.02724	7.35149	7.54017	7.02776	5.29541	6.30864	6.18503																				Col-0 vs. 35S::UBP13_2.3	-0.01394	-0,05050 to 0,02263	No	ns	0.7445
9.55393	5.5548	5.20895	5.72453	3.43755	8.35292	8.43704	7.65443	5.61975	4.41116	8.10346	7.10553	7.70253	6.67958	6.85943
5.8666	6.7783	7.26878	4.04288	3.68344	5.81197	4.8919	5.57952	7.74813	3.70962	7.2451	7.54978	3.75359	4.29803	6.06889																				3,5
4.85256	6.55139	7.76883	4.57095	6.59511	6.36429	6.45689	6.76844	4.54886	7.49202	6.05939	4.4408	4.14824	7.23988	5.01248																				Col-0 vs. 35S::UBP12_3.1	-0.06168	-0,09825 to -0,02512	Yes	***	0.0003
8.2248	5.21744	7.93523	3.7406	5.31456	7.78178	5.34282	4.61188	4.93274	5.83933	8.40314	7.83792	5.96032	7.11873	5.73288																				Col-0 vs. 35S::UBP12_3.2	-0.03781	-0,07438 to -0,001242	Yes	*	0.0406
8.23758	4.09466	4.21482	7.27843	6.11616	6.40235	8.35881	5.00389	8.19726	7.01939	7.78462	7.68926	7.46503	7.07397	7.11486																				Col-0 vs. 35S::UBP13_1.1	-0.03772	-0,07428 to -0,001149	Yes	*	0.0412
7.83681	7.58536	6.97825	7.85541	6.26073	5.19835	7.85811	5.40162	5.16168	5.8037	5.3289	5.50194	6.79112	8.3413	6.80255																				Col-0 vs. 35S::UBP13_2.3	-0.0843	-0,1209 to -0,04773	Yes	****	<0,0001
5.76086	6.30488	7.40441	5.78414	5.16352	6.24555	8.26273	6.89272	6.04851	5.95558	6.75559	5.8606	5.67445	7.8902	6.17715
6.54422	6.11302	6.91438	6.80138	6.72532	5.61072	4.06281	7.23131	6.6124	4.47483	4.02172	8.1036	4.97006	3.93859	3.57513																				4,5
6.17953	5.0625	5.36367	3.26228	4.4569	7.27038	8.2723	5.86803	4.39374	7.2031	7.3546	6.27742	7.33907	4.83557	3.09842																				Col-0 vs. 35S::UBP12_3.1	-0.0623	-0,09887 to -0,02573	Yes	***	0.0003
8.53744	5.7885	7.20094	5.12088	6.9623	7.08229	3.30022	7.34098	4.24355	3.0518	7.72292	5.14578	5.3222	6.20106	5.42716																				Col-0 vs. 35S::UBP12_3.2	-0.05006	-0,08663 to -0,01349	Yes	**	0.0039
8.48063	7.81368	7.45199	5.5466	6.49602	6.51754	5.19046	5.77121	8.35856	3.07113	4.0808	6.70805	6.85009	4.78167	4.14534																				Col-0 vs. 35S::UBP13_1.1	-0.0506	-0,08717 to -0,01403	Yes	**	0.0035
6.04079	5.70974	6.72389	3.60551	6.15343	8.28593	4.62906	5.58643	4.752	8.06786	6.29544	6.20143	7.34449	6.98456	7.9918																				Col-0 vs. 35S::UBP13_2.3	-0.07518	-0,1117 to -0,03862	Yes	****	<0,0001
7.07595	7.61239	5.85207	6.36666	6.34095	7.17057	5.60162	6.98414	6.81027	6.20468	7.86601	5.07204	5.55302	6.34272	7.53565
5.01674	7.57076	7.49868	7.7143	7.42972	6.32011	7.89645	4.79694	5.60584	5.72498	6.09343	7.66919	7.57085	5.40699	7.80606																				5,5
6.14845	5.55356	7.92375	5.91121	5.82723	5.95855	7.01214	7.63468	5.45892	6.96906	5.08519	7.78541	4.7062	3.84596	7.62814																				Col-0 vs. 35S::UBP12_3.1	0.01609	-0,02048 to 0,05266	No	ns	0.6421
5.24661	6.52839	6.6235	6.01815	4.83046	5.69364	7.51599	6.20478	7.60796	6.01781	6.88435	7.15861	4.5337	7.0587	7.55944																				Col-0 vs. 35S::UBP12_3.2	-0.00491	-0,04148 to 0,03166	No	ns	0.9917
5.45167	6.53187	5.05872	6.75222	7.90907	1.97465	4.75121	6.38005	3.48367	7.45831	7.76418	5.47635	3.5237	4.49039	4.4435																				Col-0 vs. 35S::UBP13_1.1	0.01554	-0,02102 to 0,05211	No	ns	0.6685
6.92372	8.14546	8.47296	5.17631	6.49796	6.52732	7.18532	6.08259	4.68397	7.20132	5.32444	5.59328	3.70286	5.81417	4.56666																				Col-0 vs. 35S::UBP13_2.3	-0.005025	-0,04159 to 0,03154	No	ns	0.9909
8.02915	4.06832	6.61308	6.22904	6.41445	3.02987	5.58384	7.46416	6.03388	5.14203	4.52379	4.56093	6.63055	5.77791	7.56221
7.58456	4.07536	5.64326	5.42877	7.01499	7.50256	6.8988	6.46049	7.33003	5.56346	6.81557	6.1199	5.5571	7.63377	7.208																				6,5
7.09394	3.74928	6.37709	6.85726	5.9489	5.19021	6.01457	6.87661	7.42861	6.1118	3.90589	2.83998	6.13899	8.43309	5.49988																				Col-0 vs. 35S::UBP12_3.1	-0.01017	-0,04674 to 0,02639	No	ns	0.8944
5.70026	6.85784	8.25678	7.20388	5.73511	6.10629	4.39544	7.49039	6.87978	5.61458	7.25546	6.58439	6.56758	4.04449	7.02348																				Col-0 vs. 35S::UBP12_3.2	0.0003391	-0,03623 to 0,03691	No	ns	>0,9999
5.10986	7.10639	7.88712	7.11307	5.34829	3.77697	6.61259	6.75356	4.10379	7.48908	5.31884	7.57078	6.18682	4.19427	7.58963																				Col-0 vs. 35S::UBP13_1.1	-0.00335	-0,03992 to 0,03322	No	ns	0.998
5.91728	7.46703	2.8612	6.74744	6.58408	2.50565	5.76259	4.60686	6.55805	6.74209	6.79395	7.31182	4.52628	3.42717	4.07302																				Col-0 vs. 35S::UBP13_2.3	0.001799	-0,03477 to 0,03837	No	ns	0.9998
6.66119	5.29725	3.2265	6.12494	7.12436	4.63931	7.07889	3.95367	5.52085	5.78639	7.24464	6.9809	4.00263	5.08433	6.5659
6.546	8.04938	6.26694	7.00154	7.31668	7.17596	6.06644	8.34926	5.49951	6.91242	6.31804	5.11539	4.76812	7.36165	6.85986																				7,5
7.34591	5.88972	5.09507	6.95103	6.25317	3.23195	7.90813	6.63935	8.12899	8.41248	6.20949	8.17168	5.75434	6.64658	7.05439																				Col-0 vs. 35S::UBP12_3.1	0.07101	0,03444 to 0,1076	Yes	****	<0,0001
7.88569	7.6495	5.61307	6.03553	5.22561	5.40349	6.15001	5.10264	7.1768	5.29057	8.29511	7.87367	5.9654	7.49759	6.4597																				Col-0 vs. 35S::UBP12_3.2	0.04314	0,006577 to 0,07971	Yes	*	0.0155
5.95736	7.19714	7.28619	4.07067	8.01795	4.85613	7.03914	5.24347	4.67674	7.56073	7.69915	7.07943	5.24685	7.12062	5.15323																				Col-0 vs. 35S::UBP13_1.1	0.03305	-0,003516 to 0,06962	No	ns	0.0877
6.74138	3.916	6.51536	6.18616	5.83303	7.51943	4.58322	2.8319	5.66337	7.75264	6.79929	5.62506	6.78548	6.86476	5.20543																				Col-0 vs. 35S::UBP13_2.3	0.09494	0,05837 to 0,1315	Yes	****	<0,0001
6.08259	4.0525	6.0287	6.71062	6.93339	7.695	7.00279	7.54934	5.73451	7.0934	7.45004	7.49243	5.00481	3.62893	7.21599
8.0468	6.62271	7.4256	5.39415	5.45912	4.53518	6.3538	4.9261	7.89474	7.15188	7.12077	7.04535	5.54445	7.61305	3.14098																				8,5
7.4341	5.5548	5.82899	7.34033	6.0764	5.65425	7.19166	6.43887	4.44242	5.85088	6.32143	7.56585	5.82004	5.40452	5.72498																				Col-0 vs. 35S::UBP12_3.1	0.06561	0,02905 to 0,1022	Yes	***	0.0001
7.76607	7.59761	6.17458	7.35873	6.91725	4.7646	5.32018	4.96847	5.17215	2.91982	7.49664	5.784	6.10014	3.36571	6.05563																				Col-0 vs. 35S::UBP12_3.2	0.05149	0,01492 to 0,08806	Yes	**	0.0029
7.28276	6.47212	6.55401	7.05391	6.71725	5.80287	7.55313	7.9002	5.33001	5.6938	7.98763	5.76028	7.09994	5.44018	6.9303																				Col-0 vs. 35S::UBP13_1.1	0.05826	0,02169 to 0,09483	Yes	***	0.0007
8.23296	6.89602	6.18701	3.36729	7.92877	5.92589	8.66747	7.30998	4.04529	2.67097	7.87678	6.80398	7.55166	7.97798	5.64505																				Col-0 vs. 35S::UBP13_2.3	0.07958	0,04302 to 0,1162	Yes	****	<0,0001
5.19429	8.38321	7.9149	7.90497	7.38891	7.52958	6.72796	5.53345	5.32444	4.92909	7.18958	6.35004	7.45436	4.80561	5.59958
8.09321	5.43939	6.33633	5.93601	4.98335	5.83692	7.1594	3.844	4.78244	6.058	7.88893	3.64464	8.09044	6.11282	7.55096
7.80134	7.50728	4.84969	4.78205	8.16298	5.67744	7.7172	5.72017	4.19496	7.82283	8.11939	7.45154	6.09849	4.71199	6.01176																				Test details	Mean 1	Mean 2	Mean Diff,	SE of diff,	N1	N2	q	DF
7.92361	7.86634	5.54624	5.94265	6.31746	5.91034	6.32776	3.90404	6.06442	6.9253	6.11798	4.74962	6.52933	7.15188	7.41417
6.38214	6.68446	5.89857	7.65088	5.20492	4.7328	7.52037	6.1964	7.71469	7.48808	7.85172	6.11282	5.48819	5.24225	4.34316																				2,5
7.25435	4.94294	5.51459	6.43586	5.55852	6.54032	7.67616	5.23544	5.01978	6.17782	3.73185	4.5566	7.13176	7.78312	6.35157																				Col-0 vs. 35S::UBP12_3.1	0.002809	0.01791	-0.0151	0.01463	3	3	1.032	70
6.56364	7.16505	7.0534	7.54833	4.79314	6.41098	4.46696	6.65589	7.0851	4.98209	7.57855	3.83313	7.04287	8.11881	6.70749																				Col-0 vs. 35S::UBP12_3.2	0.002809	0.007118	-0.004309	0.01463	3	3	0.2944	70
8.15239	8.01218	7.93452	7.30761	3.84498	7.11392	4.75477	8.10135	5.20341	5.09028	4.82421	5.55124	5.31071	8.22633	6.32456																				Col-0 vs. 35S::UBP13_1.1	0.002809	0.02011	-0.01731	0.01463	3	3	1.183	70
7.36479	5.78315	5.17397	5.77592	5.66956	7.42642	3.83114	6.14629	7.79577	4.83921	5.72916	6.18086	5.10654	5.85601	4.36265																				Col-0 vs. 35S::UBP13_2.3	0.002809	0.01674	-0.01394	0.01463	3	3	0.9523	70
4.3977	4.47692	8.18121	5.7302	2.70223	7.16431	7.09253	6.43549	6.04438	7.31996	5.88693	7.63639	4.11509	6.71096	5.27871
7.73804	6.58724	7.50193	3.89194	8.07748	6.78968	3.23376	4.15833	6.28822	7.28083	2.94668	6.93941	4.73118	7.0884	6.05477																				3,5
5.20819	5.94818	7.1013	2.61885	4.62726	6.94105	4.36324	3.5504	4.84537	4.82716	7.19421	8.1481	7.28942	3.81003	4.54546																				Col-0 vs. 35S::UBP12_3.1	0.02499	0.08668	-0.06168	0.01463	3	3	4.215	70
6.60888	5.00327	4.62186	6.82603	4.37486	4.28295	5.67256	4.37716	6.11434	5.83074	7.85639	7.3074	6.20385	5.0772	7.94228																				Col-0 vs. 35S::UBP12_3.2	0.02499	0.0628	-0.03781	0.01463	3	3	2.584	70
5.7444	5.39352	7.2216	4.67887	4.12032	6.79893	8.05672	7.35715	7.3389	8.07907	6.91406	4.77588	5.87088	3.5917	6.75093																				Col-0 vs. 35S::UBP13_1.1	0.02499	0.06271	-0.03772	0.01463	3	3	2.577	70
8.14712	6.12343	5.11484	4.11808	6.14353	6.05197	7.18448	7.49394	5.78074	5.33001	7.76406	4.28989	7.13747	6.5749	4.9611																				Col-0 vs. 35S::UBP13_2.3	0.02499	0.1093	-0.0843	0.01463	3	3	5.761	70
8.41248	5.92147	8.45205	5.34062	3.57126	5.97734	5.37542	6.88266	7.47819	5.26907	7.25808	6.64234	5.75637	5.51588	6.02271
5.45501	5.54749	7.78546	5.57449	6.44581	5.83141	5.38262	6.22687	5.37521	6.58541	5.84306	7.14016	6.92408	5.99292	7.23251																				4,5
6.051	7.84886	3.51963	4.58976	8.02811	8.20596	7.68138	6.5376	7.19321	6.20422	5.65264	7.14444	6.18247	7.69121	4.71199																				Col-0 vs. 35S::UBP12_3.1	0.09091	0.1532	-0.0623	0.01463	3	3	4.257	70
6.61628	6.43982	5.70272	3.52235	7.7367	8.05996	8.1027	6.29315	3.30022	5.64893	6.5001	6.44494	6.7535	6.567	6.70034																				Col-0 vs. 35S::UBP12_3.2	0.09091	0.141	-0.05006	0.01463	3	3	3.421	70
6.23148	8.72138	3.35775	5.91071	7.34883	7.07027	8.28966	5.0517	6.78662	5.53363	6.46293	6.182	8.29375	5.75186	5.16745																				Col-0 vs. 35S::UBP13_1.1	0.09091	0.1415	-0.0506	0.01463	3	3	3.458	70
8.02797	6.36839	5.73954	3.88913	6.67374	6.39449	8.35761	6.88969	5.83558	7.13257	4.9251	5.68417	4.62861	4.78512	5.53327																				Col-0 vs. 35S::UBP13_2.3	0.09091	0.1661	-0.07518	0.01463	3	3	5.138	70
5.79005	6.49872	5.78625	6.24287	7.08694	6.53933	6.75959	6.12774	6.73229	6.02227	7.77997	7.88982	7.21616	4.73643	7.50595
7.39515	7.61425	7.18058	3.93591	6.97474	8.26103	5.50437	2.94427	6.618	6.2459	6.44967	3.45509	6.22251	7.8198	7.17318																				5,5
7.66999	6.71503	5.18662	2.89982	6.66313	7.30255	7.51958	5.71927	4.6746	6.33462	7.90329	3.89755	5.0517	4.64989	7.21078																				Col-0 vs. 35S::UBP12_3.1	0.2358	0.2197	0.01609	0.01463	3	3	1.1	70
6.88716	7.78868	7.62353	3.07538	6.92823	6.22096	7.6398	7.51311	7.44799	8.02705	7.19456	4.94686	7.18924	3.34327	7.41764																				Col-0 vs. 35S::UBP12_3.2	0.2358	0.2407	-0.00491	0.01463	3	3	0.3356	70
5.05726	7.22849	6.78869	6.42201	5.48762	7.08287	7.32988	5.03869	6.8559	7.13128	7.8823	3.38299	6.7818	7.68	6.32126																				Col-0 vs. 35S::UBP13_1.1	0.2358	0.2202	0.01554	0.01463	3	3	1.062	70
6.51278	6.73311	5.56768	6.38903	7.6847	3.42269	7.66425	5.37542	8.11589	7.14618	6.15626	4.24355	5.02763	7.30924	6.90347																				Col-0 vs. 35S::UBP13_2.3	0.2358	0.2408	-0.005025	0.01463	3	3	0.3434	70
4.93703	5.48419	6.50051	6.61787	4.5638	4.83192	7.76782	4.52628	5.76863	8.31585	8.29767	7.56335	5.3885	5.94326	6.72317
5.03959	7.41433	8.15754	7.62483	5.33644	7.10005	7.58843	4.29115	5.65312	5.49462	3.81104	5.73496	6.25087	5.59397	6.29477																				6,5
7.25516	5.83732	8.10998	6.81396	5.84611	7.42692	7.75342	4.89671	7.4805	4.99149	3.05397	5.23397	7.67285	7.78352	3.56219																				Col-0 vs. 35S::UBP12_3.1	0.2459	0.2561	-0.01017	0.01463	3	3	0.6953	70
8.41379	5.76519	7.15353	4.55371	5.53454	5.00296	8.2503	6.50079	7.75839	7.46322	4.36499	6.04721	6.34812	7.823	4.95206																				Col-0 vs. 35S::UBP12_3.2	0.2459	0.2456	0.0003391	0.01463	3	3	0.02317	70
7.26014	5.02823	7.24712	4.06832	5.12143	6.4938	3.68804	4.52678	7.80612	6.72686	5.01887	7.80509	7.2077	7.57604	4.19703																				Col-0 vs. 35S::UBP13_1.1	0.2459	0.2493	-0.00335	0.01463	3	3	0.2289	70
5.05609	6.27232	7.67866	6.87832	5.98982	5.285	6.89677	5.25119	7.24188	4.84609	7.35422	8.1338	7.7722	7.21505	2.7053																				Col-0 vs. 35S::UBP13_2.3	0.2459	0.2441	0.001799	0.01463	3	3	0.1229	70
7.53012	7.39343	7.70828	5.6823	4.45477	7.0926	4.28421	7.42893	7.39267	5.09816	6.11312	4.80147	7.46658	7.45738	5.71716
5.49876	5.09028	6.42848	5.0005	7.02499	7.31573	6.52792	6.27362	7.76151	6.0625	6.66084	2.87424	6.80378	5.71277	7.75773																				7,5
5.99647	8.19882	4.80373	5.33798	5.7422	4.59348	5.96363	6.51577	5.63559	5.09282	6.31381	6.54132	6.21023	6.83698	5.60904																				Col-0 vs. 35S::UBP12_3.1	0.2951	0.2241	0.07101	0.01463	3	3	4.852	70
5.73288	8.20707	7.03676	6.03707	7.44327	4.9802	4.38634	8.25554	7.58111	5.3929	7.86805	6.79061	6.92697	6.10363	6.82718																				Col-0 vs. 35S::UBP12_3.2	0.2951	0.252	0.04314	0.01463	3	3	2.948	70
5.52909	6.27932	6.67037	4.2256	4.20048	6.03135	5.57466	7.10085	4.71651	4.32511	7.04207	7.14846	5.22759	6.25052	5.70989																				Col-0 vs. 35S::UBP13_1.1	0.2951	0.2621	0.03305	0.01463	3	3	2.259	70
7.00238	6.9472	6.55701	7.24172	7.004	5.83141	7.57521	7.59031	5.80923	7.34463	4.13585	6.20644	6.48193	8.09332	4.64506																				Col-0 vs. 35S::UBP13_2.3	0.2951	0.2002	0.09494	0.01463	3	3	6.488	70
7.09842	4.62141	7.5203	5.41743	6.3153	6.78252	6.23688	8.23051	7.89694	3.79157	6.86337	6.60665	4.80898	8.13673	6.70782
7.11583	5.66575	6.08165	5.62075	6.20617	7.45515	7.30746	5.28034	5.82127	4.81533	4.4408	5.26314	5.64456	5.09956	5.81266																				8,5
5.4493	6.8386	8.47132	4.81384	6.21575	6.86106	7.80849	7.36433	4.67245	6.02737	7.73162	7.20943	4.38463	5.7447	8.03015																				Col-0 vs. 35S::UBP12_3.1	0.1024	0.03677	0.06561	0.01463	3	3	4.484	70
6.59555	8.53498	5.81649	7.40399	4.84645	3.88254	5.35785	6.2401	7.83258	5.89983	6.74436	4.62591	6.86858	5.02853	4.8636																				Col-0 vs. 35S::UBP12_3.2	0.1024	0.05089	0.05149	0.01463	3	3	3.519	70
7.62369	6.71553	7.63672	7.24418	4.88291	6.26152	5.22955	7.59659	5.98221	7.24395	6.55636	7.14557	4.5153	7.14759	4.7251																				Col-0 vs. 35S::UBP13_1.1	0.1024	0.04412	0.05826	0.01463	3	3	3.981	70
7.37298	6.93981	6.2872	7.93503	7.30141	3.40761	4.27084	6.12403	6.71681	5.22339	4.60042	6.40471	5.99658	4.73844	6.36057																				Col-0 vs. 35S::UBP13_2.3	0.1024	0.0228	0.07958	0.01463	3	3	5.438	70
7.20742	7.48026	4.83229	6.67043	4.74045	5.98856	7.12934	4.0493	6.63405	5.23054	7.23697	7.30955	5.80688	4.16334	7.32614
7.54982	7.1605	5.93017	6.77427	5.14578	6.1992	4.46906	7.16619	8.33015	5.22463	5.20844	7.20398	7.93444	7.75839	7.0104
8.6819	7.81854	7.73722	5.1698	3.54512	3.48085	4.3562	5.52726	6.07924	4.09923	6.22232	5.77278	5.03988	6.71291	8.25479
7.87435	4.60732	6.5312	5.16667	7.34259	6.12373	7.83451	4.3178	7.3032	5.96162	5.86334	2.79614	7.60467	5.51144	7.90527
5.94686	6.47212	8.79649	6.70816	7.07731	4.5508	5.68105	6.74166	6.82767	6.07481	6.42543	7.50269	7.05328	6.94689	3.80289
5.99966	5.61692	8.24326	6.86615	6.53247	3.54379	5.2766	7.39985	7.14401	4.88325	5.37966	5.7613	6.02038	6.24421	7.21535
8.13618	7.7525	8.54286	6.27076	4.57095	6.09166	7.78823	6.81179	5.16168	4.86041	5.53779	4.93075	7.47247	7.53797	7.12709
7.96743	4.85578	7.29781	6.37763	5.00911	3.11281	7.83424	7.94623	6.06036	7.36744	5.02883	6.14501	7.58526	6.7138	3.53044
6.96013	6.20171	4.62546	3.73951	6.35588	4.01678	6.91347	7.98694	7.06138	8.2847	7.91205	5.12853	4.65863	5.39331	5.07146
7.26375	8.69574	6.08427	6.00125	6.93593	2.85857	5.5866	7.96951	6.10127	7.72603	4.10455	7.47252	5.92956	6.31514	5.68775
7.3486	8.10148	8.1182	7.27214	4.06517	5.39123	5.64602	4.5223	7.88382	6.48376	3.42119	3.4766	3.51145	5.48989	7.71112
4.67374	7.37356	6.9077	3.77486	5.94985	3.24455	7.72948	5.34018	5.33776	6.05682	5.08291	4.97356	3.12296	7.19775	7.40041
6.02782	5.51588	5.95795	6.75564	5.50587	7.20432	6.39862	3.59423	5.4554	4.82274	8.09576	4.09236	5.65328	6.5985	6.52328
7.04062	6.59052	6.95721	4.95562	7.27	5.82004	5.48553	5.52159	5.15852	6.55649	4.16691	8.31356	7.45653	5.09676	5.14257
6.40205	4.93042	7.44553	5.1228	5.0706	5.20088	6.41782	4.19219	7.95809	6.78429	4.83338	7.154	5.06829	7.57883	6.0386
7.21346	5.39394	5.14149	6.91287	2.68672	3.65892	7.04367	5.35026	6.71592	7.87836	4.62051	6.59756	4.51026	3.87685	4.83083
5.15376	6.98664	6.53886	5.50344	2.98914	5.76202	7.45968	4.47431	7.16157	7.20739	5.53977	5.8084	4.84753	5.34545	3.08172
5.60111	5.27964	8.15317	6.37302	4.20048	5.35634	5.67807	5.95949	7.71839	5.70821	6.40743	6.72185	5.01522	4.5203	7.75747
6.00239	7.87971	6.52946	6.24207	6.29941	6.65866	3.82114	5.58677	8.03957	7.10688	5.46632	5.43078	3.30528	7.73616	3.29683
4.95691	5.63674	7.4361	4.37138	7.2213	7.29142	6.57343	5.08519	7.15503	7.50233	5.23274	3.7926	6.86188	4.91168	6.22323
8.05497	5.80743	5.93988	5.40369	6.92078	6.93772	7.453	6.30597	4.76851	4.58696	6.05283	4.77433	7.08798	7.06358	6.61763
7.43683	3.50043	7.17732	6.73802	5.36044	7.84723	5.0375	6.5121	5.78131	6.12694	7.61116	4.39374	3.50043	7.14082	3.68804
6.6936	7.38609	5.22438	6.4044	7.20528	7.42056	6.59273	8.39282	6.97431	5.25695	5.93952	5.2984	5.54032	5.47405	5.08149
6.19462	5.18636	4.76186	7.86169	7.18155	2.35648	7.87591	6.42722	7.01251	6.92611	7.33513	5.70072	6.07534	5.63935	5.58021
8.14853	3.73514	4.03965	7.34027	4.90525	3.24455	7.59116	6.83811	7.27108	6.85706	6.14609	4.36089	5.82398	5.22364	7.52328
7.16948	6.86801	5.91443	6.95366	5.04137	8.1522	3.30696	5.73154	5.04433	7.65443	4.75042	4.55949	4.81978	5.94854	6.20301
8.77078	4.91472	5.68495	7.02781	7.58417	6.81295	3.97112	5.96552	6.35524	4.74922	6.2552	6.77522	6.72857	5.40534	4.55226
6.54719	5.00327	6.84164	5.36946	5.00819	6.23912	5.30981	7.27912	7.80022	5.12335	4.30363	4.54983	7.68482	5.64391	6.75318
6.13134	5.74161	5.3	4.72225	7.30943	6.91086	6.24484	6.60789	7.59216	7.55243	6.75985	6.73541	7.61707	5.03452	5.0137
7.18976	7.30361	5.27988	3.41216	4.44888	3.79157	5.01644	5.53399	6.69887	6.92953	5.0917	5.57466	7.58192	7.82166	7.81277
4.88012	5.72243	7.82875	7.55755	7.12709	2.54961	4.42114	5.72916	3.49068	7.01532	7.14151	4.52429	8.0413	5.83692	5.05199
7.1959	6.64599	7.6687	3.89662	5.01583	4.69996	6.93155	5.6958	7.14245	6.4025	4.09618	6.44158	6.33013	7.3253	2.66141
7.11067	6.846	7.56264	6.48628	8.60816	6.98664	5.66161	7.77519	8.22289	7.37781	7.56182	5.18302	7.0648	6.84653	2.73253
6.14077	4.88776	4.08544	7.4559	5.30503	5.36903	4.22225	6.38833	3.83015	6.23103	4.85542	6.84155	6.53207	5.96986	8.27562
7.27773	7.56798	5.68339	7.04887	6.52321	5.09423	8.3726	3.20997	6.89755	5.6907	7.59392	7.18702	6.58293	6.97898	4.47744
5.25143	5.76547	5.34194	5.98706	6.13869	7.79507	7.35119	4.68947	6.92728	5.17267	4.14097	3.30696	6.647	6.74803	6.50044
5.68558	7.38587	4.99926	6.63634	6.79452	7.17599	6.05499	7.18333	5.36238	7.41762	3.257	5.75463	7.03045	7.93518	3.47091
6.38864	5.21145	5.88041	7.88218	4.10151	6.39157	6.81607	3.15477	4.39996	4.83557	3.42269	4.85399	5.4217	4.20801	4.57379
7.78634	4.90864	5.02099	7.98819	6.69633	7.01709	4.4145	6.43674	6.17324	4.47744	5.86112	7.56537	5.89983	4.22292	5.40966
6.3424	5.55284	4.69158	6.51577	4.8919	6.94194	4.59534	6.73131	7.09519	5.375	5.90046	5.68977	5.46243	4.40949	6.87182
7.50053	3.52235	5.90622	5.0375	4.44995	6.57797	8.19089	8.09304	6.2854	5.24152	7.1237	3.42419	6.03575	4.1533	7.80269
5.06017	7.76463	7.27874	4.06202	3.23557	7.75378	5.14471	5.80785	6.79282	6.83476	6.85706	3.77907	5.17786	2.65819	5.48305
8.7966	3.01197	7.21815	7.29277	7.48954	6.10609	6.00023	5.01278	4.5183	6.02283	5.71141	4.25664	7.44451	3.65655	8.27435
7.48042	4.57663	7.37258	5.91456	3.00062	6.34868	7.46069	5.78555	5.5866	6.60448	5.0222	7.08598	7.25364	3.16451	6.52078
7.19683	6.39272	7.30014	7.46957	5.87437	7.57319	5.0931	7.56397	6.73677	6.78828	7.6509	6.88021	4.89362	6.23607	6.60373
5.5757	7.92102	6.66436	7.97805	6.01557	7.13943	5.75782	8.13025	4.70786	5.65826	5.78597	4.77936	5.11263	5.66416	7.80404
7.23915	6.81093	6.91196	6.40668	5.44197	6.15976	5.51385	6.67634	7.12362	6.37896	6.5916	7.46179	6.93056	7.29564	7.43152
3.95191	7.70462	4.06202	7.07004	7.37434	6.75012	6.0566	6.29324	6.84394	5.58333	4.78244	8.02537	5.87152	5.03093	7.66149
6.07776	6.15441	4.83156	3.75573	5.15376	7.00862	6.78751	4.06675	5.29633	5.33157	5.76777	6.75377	7.45388	4.71446	7.40321
5.76906	5.83732	5.77407	3.53447	6.24064	3.95014	5.83772	7.97918	6.69468	7.00592	7.30533	6.92187	5.83195	3.60301	7.04599
4.86218	6.37067	5.02763	7.23145	6.19115	4.25404	7.94102	6.98192	3.72854	7.36299	7.53344	7.48416	4.48626	7.4036	5.72077
7.46923	5.35482	8.49538	5.49951	4.89465	7.21932	4.24618	7.41403	4.87977	7.59274	6.31564	5.86125	5.78696	7.78802	6.39395
7.34345	7.66907	6.87874	6.67391	7.63231	7.15883	6.66816	3.12498	7.13022	7.3882	7.11273	7.47853	6.29773	3.02542	2.88966
7.67095	5.74646	5.88207	4.73361	4.68947	5.67823	7.45332	3.95543	3.09635	7.41814	5.22067	7.12591	7.36981	7.07455	4.85613
6.7484	6.54896	5.09339	7.35946	8.27678	5.14818	4.64329	8.00896	7.49959	6.2032	7.08905	5.06829	5.41233	3.81206	8.20016
7.50879	7.31124	8.15008	7.398	7.33693	5.87114	7.46356	7.11802	5.24975	6.19359	5.32756	7.18434	6.48998	6.04558	4.15114
6.80956	7.54646	5.93661	3.78116	7.49333	6.15324	3.98231	4.83557	5.31501	6.80158	5.70195	7.03543	3.17415	6.4625	3.24097
6.84253	5.4221	6.43872	7.67236	6.54145	5.9557	3.99843	6.36484	5.784	4.23495	4.24881	5.87437	6.38183	6.72648	6.88693
5.66687	8.27643	8.55285	4.00848	5.28268	6.91788	6.04057	8.09003	4.67074	5.08063	7.06758	4.85934	6.79277	5.39685	3.2044
6.98897	5.96716	8.18465	6.76033	4.70661	7.03619	7.40536	4.94097	5.83745	4.13731	7.7032	4.68989	2.65497	4.46326	6.98613
6.11899	7.28864	5.92577	4.08157	8.63658	6.60149	4.25208	5.64715	7.51241	6.45761	6.32027	5.34479	5.08604	4.3892	6.06036
8.36785	7.40715	4.93867	3.76959	8.2552	7.54275	6.06591	6.92363	7.6371	5.17631	5.99005	5.76144	7.39963	7.9634	5.06858
8.34286	4.07458	7.5743	5.51681	6.24261	5.2092	6.42044	5.9127	3.26404	3.36412	7.76324	8.30505	5.84346	6.03311	4.67031
8.71099	4.74085	7.21838	5.15323	5.51422	8.31726	5.87437	7.42836	4.72957	7.62732	5.2766	4.11509	4.43918	4.42279	7.22702
7.22685	6.88063	7.22308	7.86497	6.13403	8.59829	4.77704	6.22886	3.35295	7.85951	3.65774	3.93591	6.49844	6.45039	5.51144
8.50985	7.60218	7.81588	5.65489	6.20561	5.93406	5.27519	7.95572	6.33535	4.97388	7.09763	7.36384	4.2702	6.84316	7.02626
7.336	7.14074	6.48523	7.53007	8.02846	7.68273	6.8026	4.77743	5.0088	6.25114	6.32431	7.82976	7.53956	3.00062	6.06282
7.36427	8.2432	4.59395	6.36492	3.29172	6.355	4.92976	4.84537	5.57553	6.75184	7.14759	5.23982	5.69194	5.71867	3.6869
7.11067	6.24386	7.66615	6.6246	2.3029	5.53671	5.20744	6.91068	4.32693	5.06598	7.70264	6.58077	6.9855	4.00095	4.08312
6.48593	7.6401	5.35395	5.72468	7.32248	4.07925	4.96719	4.64682	5.13881	5.85536	7.53616	7.7405	7.42377	4.28295	6.68435
8.05014	8.13838	7.02793	6.35004	4.11209	6.56007	7.19775	6.86605	5.07692	6.41144	7.10308	5.02552	4.09695	7.8526	5.40637
5.23641	4.88568	7.12055	5.17527	2.75613	4.90252	3.43015	4.81085	6.75852	6.83397	3.46519	7.5257	7.02434	5.36603	4.71775
7.25743	5.61391	5.98163	7.39822	6.6775	5.5157	6.98524	6.50553	7.74269	6.55251	4.31105	7.22825	5.40452	4.87172	5.16745
6.03179	8.31199	5.05784	6.53992	5.88501	6.58287	3.71187	7.81937	6.54211	7.5196	6.52765	7.84025	4.65384	6.20765	6.70406
6.49547	4.3178	8.16479	4.07692	6.40978	6.96126	7.70409	8.00222	7.18931	6.1615	3.65299	6.67785	6.80005	3.6869	6.99353
6.09632	7.51369	6.47184	6.80698	6.04829	4.68312	5.436	7.60165	6.97375	4.88464	2.95627	6.26336	6.87855	6.92629	7.21714
6.63363	5.11235	8.31082	5.78484	5.86712	5.20668	7.35131	5.32556	6.09156	5.33201	8.128	5.55958	6.44151	4.72265	7.31698
6.16613	5.01522	7.91242	4.28737	3.22285	7.27893	7.53121	5.89239	6.62039	7.99049	5.93625	3.82915	6.73196	4.06044	4.22895
7.22575	6.52369	5.2102	6.60758	8.05582	5.68324	7.41488	6.50656	7.70957	6.57234	6.27293	7.71739	4.96623	5.03183	7.29498
5.62091	5.38535	5.26362	6.69593	4.6582	7.08375	6.38972	5.00758	7.70842	6.91656	4.82789	3.2499	6.14796	4.99802	5.66528
4.16975	7.68193	4.94881	2.97519	4.0485	3.79776	3.77276	3.83809	5.35634	6.53087	4.06832	6.55818	5.92809	4.65384	3.28315
7.57789	5.5181	5.84638	2.72654	4.8363	3.85766	4.57568	4.55177	7.4821	7.47239	7.54978	7.58108	4.57285	6.47658	3.17031
7.69594	5.7422	6.6775	6.89982	7.12484	5.9056	4.05885	7.29971	6.3562	7.7799	4.76186	3.01423	5.83034	6.88763	6.45488
7.86384	8.34182	7.96777	5.24685	6.25476	3.99421	5.81649	6.62301	3.9105	7.98538	7.61804	5.27378	7.18671	2.99834	7.81923
7.73465	6.66125	6.90885	6.2435	5.22808	3.916	3.60676	3.37674	7.52941	3.56609	5.35698	5.86569	6.51584	5.56855	4.6634
8.12673	4.66211	6.08823	7.04315	6.0236	5.86021	3.98998	3.6601	4.87628	2.91236	5.30662	6.54462	7.04555	3.07961	8.01915
7.51791	5.65666	7.52882	7.52894	3.04089	4.66643	8.25227	4.91506	5.60009	5.15588	6.63731	4.37486	6.57426	4.96783	3.35935
7.80146	7.22692	6.19631	4.13511	5.66321	5.27261	4.97515	4.99523	7.55929	5.5269	4.34436	5.14604	5.34938	6.08259	5.98406
3.93411	6.44224	5.29334	5.19861	6.29392	5.99521	4.34376	7.26327	7.67758	7.95311	7.24162	2.97519	7.26182	5.5157	7.74884
6.1837	4.53271	5.7469	4.00347	8.73245	5.66225	7.96144	5.39123	7.30364	6.55205	7.40332	4.94457	7.26616	3.36412	3.49068
7.20562	7.26359	7.33256	5.71141	5.12853	5.37712	4.4816	5.42048	4.70537	5.79495	7.77707	6.19021	6.5816	6.60498	7.84052
5.43459	4.75161	6.51536	3.90312	3.35295	5.58711	6.83347	8.72606	5.22685	7.84727	6.40781	7.63763	7.5258	3.1856	7.21754
7.99077	7.57229	6.89732	5.79369	6.56383	5.57065	6.55224	4.68863	6.55479	8.0222	7.89638	6.61222	5.7994	6.27431	6.09746
6.19762	5.79467	7.49952	7.55721	4.21414	7.56571	5.2147	7.65009	3.28659	5.98059	4.74405	8.27664	6.16662	7.08429	5.38787
6.06218	7.92333	5.13124	5.88438	4.38634	6.47721	4.92344	5.75347	3.41819	7.74569	7.0317	4.792	5.5289	5.26718	5.53127
7.94125	6.32192	5.7762	8.09923	6.00917	7.70131	6.11434	7.21724	5.56434	6.32858	5.54086	5.69256	3.01648	3.85474	7.15954
8.19929	4.71281	6.14943	5.4775	3.86826	6.95926	7.70957	7.74504	7.69963	7.19669	6.782	5.83061	4.54351	7.74058	7.35507
8.26087	5.43319	8.18714	6.10096	3.79157	6.55041	7.78703	6.53341	6.59906	5.29702	7.58961	7.92683	6.86039	5.06945	8.21357
9.15491	7.03833	7.96964	6.97795	5.40534	5.22759	6.54791	6.17563	8.11708	6.74803	5.07376	5.11842	5.16168	7.15195	6.1583
5.17033	6.48256	7.9332	7.33836	1.97465	4.72997	6.34924	5.436	5.12444	7.34383	7.98012	6.75522	5.45265	5.97664	6.83347
4.34495	2.07169	7.46705	6.71736	6.43092	5.49084	4.77123	6.41902	5.69919	5.00819	5.15826	7.23612	2.68984	6.38826	7.84684
4.43972	6.18578	7.22962	7.63404	5.36345	6.86447	7.5668	6.68096	8.605	2.94909	7.52887	4.00347	6.79436	7.82041	7.32687
5.09085	5.04048	6.8649	6.78507	6.09218	6.80306	6.4883	4.88221	4.78128	3.129	8.73865	3.73075	5.07863	7.31634	7.73718
5.0381	5.27918	7.7272	6.59724	5.86099	4.62861	4.83739	6.72653	7.55963	6.11017	6.10752	6.86715	5.04787	3.63862	5.3671
7.99819	7.29697	6.48446	7.72301	6.02682	2.99834	7.32623	6.23993	5.42413	6.61505	6.85726	2.7877	4.73964	2.76773	5.16142
6.48045	7.08779	6.81853	3.93859	4.49142	3.33186	6.11302	5.7823	6.30798	6.94887	6.09436	3.27798	6.04558	4.60319	5.4861
6.36721	7.27073	7.34996	4.1754	4.43647	6.11728	4.71897	7.88384	7.95266	8.00039	3.14494	7.34193	3.23737	4.43266	8.17222
5.28338	8.00094	7.82946	7.29011	7.573	3.67301	6.58895	6.12061	4.20596	7.05937	3.93591	4.35502	3.33677	5.80536	6.63466
5.65714	4.70703	5.08206	4.77162	5.18148	3.21551	7.98141	7.66591	4.31902	7.29105	3.0387	5.33754	7.01371	4.5879	4.37889
6.63598	5.40843	7.45849	7.48844	8.39475	7.3912	7.63173	4.54595	6.50444	7.49197	7.5545	4.74045	2.8533	4.28611	5.11125
7.53391	5.61106	4.89843	4.72672	7.89457	6.01803	5.71837	3.65537	4.06517	5.5548	8.03149	7.65827	4.46906	6.69848	5.17657
6.1383	8.58349	5.80246	3.77802	7.99335	5.4356	7.19696	2.85857	4.16191	7.13425	5.11622	5.31636	6.60112	5.5594	7.03106
7.70999	8.29208	5.84585	4.98524	5.85955	6.38028	7.70085	7.99793	6.88964	7.51484	3.98998	7.31793	7.39431	6.73579	5.91431
7.65552	7.35363	5.39352	5.6573	2.91734	4.85184	8.02731	5.98568	4.6793	2.93456	6.33925	4.78742	6.20097	6.47439	6.88021
4.76499	7.72673	5.92344	5.94542	3.68804	4.59348	7.719	4.81421	6.26476	6.56751	6.06068	7.76201	6.15985	5.26954	4.11359
8.29975	6.75082	7.14122	5.26314	4.44458	7.44994	6.47077	5.53797	5.45029	7.72199	7.58361	5.65842	8.00647	6.81138	5.37521
8.27726	6.48956	8.48665	7.54197	3.93859	7.70297	7.04715	5.19123	7.20221	6.56558	3.59423	6.26082	6.00204	7.62644	5.61207
4.04207	6.23427	6.1645	6.5012	3.33186	4.70537	4.77859	5.13961	7.0313	3.85377	4.66729	6.84316	6.27302	6.25043	4.89568
6.05132	8.4586	7.09865	4.56762	5.89378	5.5955	3.00518	6.77028	4.27084	4.39996	6.99504	6.89728	5.08092	7.21774	5.64537
7.96711	5.78089	6.58084	5.86517	5.37138	6.58882	4.31535	7.31268	5.16772	6.7921	6.02194	8.20548	5.81389	6.38377	6.21767
8.741	4.57804	4.92043	7.35122	7.57047	7.49662	2.8373	6.34458	6.58376	4.34733	6.50923	8.00725	6.15548	6.84253	5.97676
5.78484	7.58864	6.65524	5.55053	3.98231	3.91874	5.57152	5.72483	5.62902	8.02921	5.55373	6.73671	4.9413	4.08775	6.94817
5.67177	7.20851	7.91106	6.05746	5.39831	5.57779	6.3334	5.40121	6.95318	4.72997	6.85508	4.6827	6.43828	5.81649	5.1107
6.24644	6.93745	6.68038	4.99087	4.22426	6.64771	6.67865	7.43724	7.7579	5.41007	7.6755	5.74058	6.11078	6.67582	3.35134
3.76959	8.1302	5.0832	7.49921	5.36496	3.70173	7.33773	7.58778	5.41723	5.47462	4.62321	8.32688	7.54605	5.08405	6.16169
6.73834	7.85625	5.52287	6.569	3.5879	6.49165	5.94314	6.39632	7.97751	7.33654	5.97045	8.07635	7.19318	6.61695	3.17223
4.87242	5.17033	6.53873	6.45567	8.17135	6.0216	7.07132	6.99853	8.4052	7.67417	7.52773	7.95284	5.01186	7.59876	3.86249
3.61544	6.92323	5.45833	7.48117	7.38113	5.16798	3.56868	8.02531	6.78782	6.51726	4.25989	8.32591	7.05284	4.16548	7.12543
4.89293	8.04115	7.84949	6.19425	5.61072	7.33018	7.4629	7.86996	5.87951	7.31844	5.99017	5.76777	7.33304	3.71857	3.14296
5.42756	4.31963	6.29705	5.27072	5.07835	7.66126	5.24758	4.54497	7.75857	3.37987	3.86442	5.79145	4.65515	5.08291	3.01423
7.86502	6.44479	7.86314	6.59756	4.13878	5.17137	6.58971	4.14897	6.07661	5.76849	6.77522	4.78971	6.28498	7.46734	4.93966
3.29683	7.37408	6.1949	4.82274	4.90252	5.24322	8.10342	6.27802	7.22492	3.39229	3.12094	3.55304	7.31671	5.03153	3.68575
4.82495	4.85112	7.51691	7.29784	4.3852	6.4645	5.89555	6.42937	6.1374	7.84501	7.10684	3.38299	6.69633	5.44713	3.46519
2.7877	5.85075	7.09842	4.02255	6.04883	6.0216	7.5539	5.67225	7.19359	4.05885	6.7262	6.75911	7.33426	6.13184	4.18313
3.78325	3.53179	6.85933	5.28384	7.05728	4.95303	7.24205	5.06974	5.41621	5.96681	6.98762	5.55462	7.53251	3.9959	5.40225
5.55622	5.11401	5.91666	5.63313	6.48193	5.8666	6.22323	7.79624	5.28198	4.03398	4.49655	6.01097	4.08312	7.15979	4.39261
8.14737	5.08746	6.6576	4.67545	6.00872	4.95141	4.18453	7.56782	7.85142	2.7706	5.48191	7.51389	5.95177	6.3441	7.55443
6.03991	7.22207	7.82214	6.91797	8.45289	7.15047	6.58166	7.60778	5.94024	7.34202	7.68972	4.34137	5.39935	4.64417	4.69996
6.55877	6.79652	5.32779	4.42059	7.90125	7.45228	6.0626	4.64241	7.44096	6.78787	7.358	5.24274	6.65566	6.20116	5.068
6.67374	7.78266	8.30649	5.47865	6.89156	4.85005	7.75086	7.15206	5.89175	4.82752	6.05596	4.62591	6.00034	5.31681	6.68274
7.65996	6.42283	6.7614	6.6046	7.25876	7.90391	7.02544	6.75399	3.75036	4.7689	6.97022	5.26338	4.91101	4.93736	4.00095
7.41184	7.42749	6.6514	5.70072	8.08792	5.44138	7.89703	5.71141	5.09676	7.64987	5.72602	5.13124	5.25766	5.11567	5.67729
7.40804	6.97104	7.75435	5.32243	7.52305	5.6694	2.7444	5.17449	7.38342	4.12181	5.42514	5.72677	3.0365	6.41114	4.12552
6.43144	7.2144	8.2754	6.66839	7.28345	6.29044	3.20626	5.67933	5.52122	6.04035	7.74418	6.63749	7.96291	7.04175	4.7782
7.90198	7.74543	6.83604	5.08972	7.85196	7.3845	6.14658	8.27341	6.22551	7.26987	7.57958	5.13043	7.06613	3.88631	5.64748
4.81756	4.54741	4.53813	7.63242	4.13804	6.67049	8.31788	5.65312	4.7755	5.3981	3.80697	6.75227	7.18128	3.16451	7.34342
5.87385	7.15353	7.8178	7.26201	6.30505	6.99353	4.692	7.45465	5.82845	4.44781	4.08467	6.19967	5.07146	6.62185	4.53567
5.59516	3.96679	7.74492	4.02746	7.28247	3.598	7.24323	6.58351	7.4698	6.92115	4.83338	6.79498	5.65666	2.7706	3.90682
7.08329	5.06308	4.06439	5.20895	5.49857	7.20211	6.32085	7.67936	5.35612	6.21877	4.1533	5.3393	5.54481	2.66779	6.76537
7.95473	6.25176	3.26228	2.69605	7.16633	3.95014	3.57384	4.7689	6.17362	6.88964	5.36496	5.49273	6.30026	5.59362	3.31032
7.87737	6.01557	5.91394	7.12329	5.38934	8.11032	3.75251	4.39431	6.43402	6.31339	6.38656	4.91607	5.13854	6.18209	5.97477
8.88424	7.19542	7.58726	3.51691	2.12789	5.92036	7.43095	5.92589	5.30092	6.62063	7.75035	4.61279	7.23879	6.8917	3.12296
5.82872	5.9489	5.03929	1.72242	6.79816	7.65749	6.9509	6.76595	5.44515	7.32273	6.31031	6.15001	4.55708	6.21776	3.916
5.07549	5.26812	7.62131	5.19505	4.98868	5.31726	3.10872	7.03502	7.24441	7.83473	5.45344	5.60635	5.82371	3.6765	4.24815
6.42387	5.9287	7.96081	7.47424	5.53018	4.87453	7.76502	3.76109	6.34184	7.46156	8.0099	7.59482	5.22487	5.85615	3.32858
4.07458	6.6599	6.69252	5.87694	3.59043	6.47198	5.21095	5.31884	8.15726	5.34106	6.00748	7.04895	7.52714	6.4066	3.31866
6.69394	7.58678	6.09911	5.9056	7.72461	4.97831	5.59737	3.43755	6.23364	3.35935	6.90098	4.94457	6.72972	4.87838	3.63257
6.92638	8.56452	6.88138	4.63486	8.53714	5.79243	4.38863	6.95847	6.61468	4.47587	6.61775	6.42283	5.81595	6.2712	5.54588
7.34715	8.27122	6.48726	5.16562	6.14854	7.72469	5.72228	5.27636	8.54712	5.59635	6.22569	5.03691	6.01333	5.42048	6.21593
5.73925	7.58302	7.71225	6.28506	5.44752	3.67417	7.78859	4.33598	7.60946	4.77743	5.08519	7.66653	7.03024	6.94464	3.91874
8.63735	7.80386	5.86504	3.64344	5.78724	3.87685	6.2256	7.47954	8.12261	6.49477	3.83809	6.00894	8.1051	3.63136	5.52525
7.70286	7.56891	4.76967	7.81269	8.36903	7.2849	6.94707	7.51943	4.76967	7.16246	6.68933	6.92971	6.97564	3.55697	5.81909
5.77335	5.63805	7.28763	7.56487	5.25862	4.47116	6.28916	6.2226	6.73382	4.0691	6.36823	7.61432	3.96592	7.99381	6.32275
8.31523	4.73884	4.17329	7.58064	7.84139	2.43585	7.79486	6.33543	4.84825	8.01784	4.11434	5.65119	6.19584	4.79466	3.48928
6.77511	4.38234	7.03033	6.42029	4.72997	4.15618	6.55283	5.5466	5.89302	7.78424	3.17415	7.18344	4.73078	6.92751	4.53222
6.22514	7.40399	4.97863	7.53533	3.41668	3.66716	5.0976	6.30588	5.14738	7.48869	2.70836	6.8982	6.06367	7.68996	6.71202
6.49352	6.54614	5.62058	7.3192	6.76415	6.49678	6.94526	6.99731	6.80352	6.03772	4.87977	6.5384	5.57762	7.569	5.0517
7.34315	7.78356	5.66972	3.49068	4.56523	5.42756	7.5453	6.9659	5.27425	4.11659	5.63935	6.2205	5.99395	4.21752	7.04743
6.65713	6.65743	4.63353	5.6823	3.95894	5.02038	7.79356	6.96426	7.71934	4.18453	4.87207	7.01507	4.45103	3.3736	5.86997
5.51144	5.97641	6.34804	7.26211	3.39691	7.75873	6.2117	7.54126	5.83892	5.21794	6.91911	5.48019	6.81391	5.13557	6.58933
8.72923	5.35395	6.02604	4.82716	4.02419	5.72243	7.1468	5.59397	7.65656	5.82561	5.7539	4.82089	4.90627	6.13423	8.02256
6.93406	8.54471	7.95778	5.28918	3.49487	5.1807	8.38651	6.07048	5.31094	7.86033	6.0059	6.22305	6.99635	3.31366	5.88476
8.9088	8.463	5.57588	2.67097	8.03757	7.72734	7.33639	5.56416	7.03757	7.11594	6.97564	7.23121	6.0497	5.39039	6.94892
5.44654	5.71912	6.43321	3.30191	7.5258	5.36474	6.92539	6.61947	5.77364	6.4167	4.64064	5.41662	3.10667	7.3124	7.28926
6.6103	6.5816	7.09348	7.69214	2.47523	5.16641	5.138	7.77675	4.5879	3.5358	4.66643	7.54775	4.84969	5.78159	3.98231
3.79981	5.14978	7.77326	5.8953	3.59549	6.15256	7.46831	5.37052	5.27918	4.93406	5.7584	4.74644	5.12417	5.00296	3.81408
3.80901	4.40165	6.46386	3.97888	4.39261	4.84789	6.35261	4.61325	6.77705	5.96139	6.85957	6.77935	4.84861	5.09113	7.04759
4.69912	5.76576	7.44842	4.3708	3.16838	5.56029	5.81444	6.48516	7.68722	7.76566	7.51093	4.34674	6.03212	5.67508	6.83875
7.32596	4.76967	6.68716	1.94884	6.75484	5.79954	6.46135	4.75081	5.94518	7.05665	2.68984	7.28908	5.63952	6.62173	4.94718
6.45293	6.643	5.84359	5.34742	5.71595	5.7422	7.76229	5.7994	6.5247	5.73481	3.48928	6.97611	6.83075	6.55486	7.52112
6.58756	7.69109	8.55833	3.43459	4.52628	4.00931	8.30693	7.69842	4.37659	7.14542	6.66932	7.46248	5.30252	6.09777	5.18148
4.5047	8.36504	7.47611	6.60261	8.03416	5.68667	7.14723	4.57804	7.07661	6.02093	7.69627	4.88256	6.87077	7.56221	7.01255
8.24976	5.33776	6.86935	5.87823	7.30212	6.94313	6.39747	3.31032	3.09635	4.84247	3.47234	4.60686	5.68573	5.16693	5.54014
5.92233	4.73764	8.3219	7.41707	5.00481	3.13899	7.36584	4.45316	4.11584	7.84549	2.97049	6.14903	7.11015	7.3449	6.94189
8.03587	5.10347	4.03154	5.58591	7.68535	4.845	6.79205	4.44566	5.30662	5.41028	5.20769	7.54173	6.86834	6.06793	5.52817
5.06192	7.05098	7.59142	5.76562	5.97162	5.27941	6.60149	5.61892	6.79066	6.30211	3.27798	5.89605	5.47539	6.84575	5.8199
4.13658	7.00338	6.04199	6.34788	7.73469	5.6129	3.48788	6.98863	7.31078	2.81556	5.03123	5.30708	7.01276	5.22857	5.31184
4.76225	6.71786	6.87486	3.02987	5.62423	6.63743	3.3736	5.2369	4.97419	4.28863	3.86922	6.78926	7.70502	7.00974	6.74986
6.1919	6.41557	7.38171	6.24171	5.76216	6.98252	7.14339	7.18737	4.97831	7.22525	4.15114	5.61808	6.4635	6.78828	6.29815
7.8212	6.44143	5.88807	7.64237	4.66384	4.3239	7.24676	5.47961	6.08312	4.47796	4.97578	6.92422	6.97611	6.666	3.50457
4.01347	7.44139	5.2579	3.22285	7.81834	4.96911	7.60809	5.78173	7.83958	3.90404	6.3109	5.12934	6.90375	7.06601	3.29172
6.68578	7.82155	7.71528	6.85721	3.29852	6.88707	5.68292	7.19772	8.23771	7.49547	6.03498	7.03215	8.0582	4.77743	6.69138
8.1549	3.57641	7.45492	4.75438	4.70204	6.25087	7.22294	6.39785	6.632	8.01944	4.64241	7.40998	4.03804	4.92009	7.18023
8.19448	3.26228	7.36474	6.01131	3.45509	6.24189	7.20012	6.70271	5.9881	6.92845	6.86351	6.5054	4.09771	4.37138	6.92674
7.88115	5.50176	7.43271	4.78013	3.41668	5.71353	5.88323	5.52269	7.84721	6.03958	7.23101	5.88896	6.04656	3.137	7.03514
6.68113	5.42271	4.78205	4.75438	5.65103	7.4739	5.24806	7.62239	5.80204	6.62008	6.68544	3.58917	5.54086	6.15879	5.52324
7.47132	6.72312	7.45513	6.2757	3.91691	6.63995	5.86217	6.35309	7.82289	4.64329	7.195	7.83708	8.03428	7.21939	6.4712
7.15693	7.86116	4.92243	7.69341	6.72378	7.41894	5.8701	6.83786	4.30115	5.09507	7.34561	7.12021	6.5312	6.07966	5.51551
5.10959	7.07723	8.17691	7.75317	6.44661	6.67118	7.09857	4.51278	6.49109	5.42109	5.93212	5.86647	4.72835	6.16517	5.74646
8.07133	7.2923	6.42781	7.77607	4.45902	7.02148	7.21173	8.23385	7.54716	6.62903	7.4591	3.36729	5.50903	4.0636	6.06324
6.26458	5.95272	4.94425	6.26144	6.85639	7.69542	7.62682	6.96065	4.99305	5.04048	7.97061	4.58462	4.09159	3.36094	7.18298
5.62091	6.62855	5.26291	7.03162	5.38577	7.02874	6.47049	5.45226	5.74748	6.98537	7.11262	5.62357	4.11434	5.83182	4.42719
6.49359	7.27599	6.28907	5.60314	6.24261	6.5431	5.09507	7.493	4.7524	7.3797	7.414	4.54058	7.68193	4.67759	6.29485
8.90154	7.53327	5.88972	3.19692	5.97687	7.8221	5.068	7.28939	3.38455	7.22432	4.02255	4.99149	6.91806	6.34393	3.65537
	7.13918	5.29426	4.31596	8.07338	6.2631	8.12971	3.87304	5.47674	6.14432	8.25015	4.14388	5.76921	4.81458	5.81554
	6.765	6.15587	8.15735	4.29178	7.9336	5.51144	4.74843	5.28034	6.17572	4.47274	7.18903	4.08002	6.91045	5.0222
	7.28973	7.38916	6.08907	8.71441	6.15441	4.4991	6.87268	6.49387	7.67567	3.90034	7.44338	7.88917	7.0045	4.81048
	6.86519	5.09507	5.15084	7.23843	5.77164	7.35499	4.46696	5.6656	6.14952	5.17734	6.69899	4.95076	5.57501	6.83243
	5.37606	7.42095	5.46942	6.47304	4.10832	7.8157	6.55538	5.77392	6.20478	5.92024	6.16556	5.82195	4.54643	4.42883
	7.53002	4.84933	7.13454	3.29001	6.38385	7.32889	5.45951	4.57521	6.58045	6.40288	7.43583	5.61424	6.72356	4.59765
	4.84861	6.7476	6.65613	5.19327	5.32265	5.11484	5.07376	7.44469	7.68112	5.47616	5.34938	3.64703	7.76002	7.53807
	8.81709	6.28421	6.00363	5.45716	7.62133	5.40658	4.05647	5.88552	8.62321	5.3701	4.36557	6.19873	6.30563	7.02303
	6.92395	7.5021	7.11489	4.5223	5.99063	5.93758	5.74836	5.82208	6.6514	5.46087	4.31535	5.3885	6.22178	4.30301
	7.22875	7.17704	5.16484	7.79999	5.83209	7.60648	7.44346	7.82877	5.23909	6.40948	7.46564	7.57745	6.66096	5.30206
	3.46948	6.23661	6.85164	4.20528	6.37935	5.99224	7.81427	5.23544	5.74924	6.39103	7.3372	7.00525	5.28524	7.23287
	5.79732	6.59912	6.29654	7.80046	7.46466	6.40948	6.62885	4.66988	8.35334	7.05379	5.66257	2.95866	6.12061	7.34187
	6.47332	7.45156	6.50752	7.14067	4.13731	7.48833	5.28198	5.11263	7.53797	3.18939	6.44567	6.91715	6.5529	5.88246
	4.82716	7.5672	7.05795	5.34698	4.18173	7.68651	6.44012	8.03064	7.44064	3.20812	5.2719	7.7817	2.72052	4.49706
	6.62958	6.07871	5.54158	7.87883	5.33577	4.127	5.48019	8.13002	5.99372	7.53692	8.01857	5.65634	4.97165	5.14069
	4.32814	4.70371	3.96679	6.53461	8.07077	6.07101	7.19974	6.05649	6.11637	6.37709	3.87875	2.97753	3.12699	4.96591
	3.58917	5.47019	5.8896	7.95308	6.62976	4.16762	6.04199	6.09332	5.62836	5.13476	7.4241	4.479	4.29366	6.28754
	6.9992	6.02316	2.8533	8.01014	5.37052	4.0461	5.33688	7.93654	8.19721	7.59915	6.90853	3.56219	3.04309	3.67882
	5.84731	5.56452	6.67686	7.43469	4.43102	5.43038	4.2766	3.67533	7.22499	6.33274	4.18453	5.32756	3.46519	5.25335
	6.37067	3.29343	4.00931	7.51895	6.724	3.08382	4.82789	6.14383	6.27457	6.83125	5.96881	4.89052	4.03236	3.46375
	4.87172	8.10053	6.06367	8.26348	5.71004	3.63257	4.45156	3.23014	6.64551	7.67633	5.45775	7.59735	7.1642	3.80697
	6.17295	7.88001	7.81427	4.03236	7.11951	5.97337	7.99028	5.00327	6.72703	7.4153	3.38299	5.84691	7.07506	7.03069
	7.21451	5.12662	4.50368	3.69377	7.1825	6.01792	4.63353	4.30115	5.09339	4.88949	3.39845	3.48788	4.59488	7.07715
	7.19703	5.66813	4.96495	8.02672	6.94114	6.4853	6.04807	7.16937	6.52752	3.35935	5.87643	4.90593	6.47898	5.68277
	6.30814	6.54482	7.85907	6.69995	7.00513	6.88618	5.44416	4.41339	6.30798	5.57257	5.77904	3.31366	5.52836	5.66289
	5.20013	7.80091	4.5168	8.12913	5.63198	8.60314	7.28219	5.1018	4.71856	3.40913	6.37294	3.5879	5.66766	6.49179
	7.06593	5.03482	7.68045	6.3977	4.85184	7.91458	3.64942	5.83759	4.53518	6.75415	5.59975	6.06878	4.58696	5.20492
	5.43078	5.57152	6.58185	5.3954	7.30678	7.10213	3.87113	5.28244	6.13263	4.56236	5.45068	5.44535	7.40519	4.11957
	7.43783	6.32808	4.23295	6.55662	7.20067	5.87075	4.88464	5.27847	5.38029	5.70532	6.17515	4.81011	4.09771	4.75753
	6.80972	8.67251	7.63397	5.25551	7.48042	4.26956	6.86615	8.00121	6.56046	7.13304	6.55381	7.23145	3.73404	6.94007
	5.80619	6.86034	7.11955	6.10373	6.77616	5.34458	5.76072	6.33706	6.22551	6.92246	6.51611	5.90735	4.00095	4.50673
	7.37873	8.01822	5.69194	5.67493	5.35807	6.88167	4.94195	5.92944	5.61424	6.8742	7.72528	3.64103	6.98715	7.00187
	7.45399	5.98891	6.00227	7.77528	6.35604	5.91926	3.11891	7.4119	8.13622	7.71612	6.76426	6.941	4.14824	5.24177
	6.5527	7.00633	4.21006	5.47019	7.23393	3.62771	6.7429	6.36729	7.02152	7.43345	7.84139	5.54319	4.80147	5.20038
	7.41602	6.18333	1.83838	5.86569	6.84091	6.62994	6.80138	6.94393	5.53996	7.55627	5.63166	6.93003	4.50875	4.63353
	7.64766	7.37655	6.59449	5.98047	5.68884	5.41028	5.4113	5.5724	7.85834		6.56396	5.77904	6.42662	5.43659
	6.85174	7.67771	3.9959	6.77044	4.36848	7.48892	2.88711	3.91782	6.58762		7.30681	5.45892	5.21345	4.02665
	7.17364	7.17374	7.30048	6.87813	7.04503	8.27553	4.52975	7.64052	7.19841		8.31049	6.63285	5.39477	5.0005
	6.44363	8.10903	5.19403	4.54886	5.37372	6.35715	8.01568	5.46165	6.03399		7.77185	7.6238	3.7085	6.07122
	5.3089	6.12774	6.37161	4.1754	6.19228	7.71632	6.16305	4.77974	7.05996		7.39287	6.75195	4.68651	3.80391
	7.25458	7.20651	5.8333	6.23831	4.79996	5.27166	5.69673	8.50958	6.25273		5.17241	7.20378	3.19316	4.78551
	5.23617	5.8477	6.10075	4.38577	7.40472	5.57187	6.52933	7.88987	6.61916		5.1057	3.72523	7.16043	3.88443
	7.98247	7.90112	4.83338	7.62727	6.63688	4.67844	6.22976	6.24661	5.77592		4.89293	4.67117	7.37876	3.79879
	5.82534	4.50723	7.66902	7.28462	6.20829	4.91741	7.31038	3.60924	7.40002		6.33868	5.5081	5.12471	4.57521
	6.63839	7.68444	5.20139	6.94074	5.14283	6.03135	6.20032	3.40609	5.25431		7.35196	5.69796	7.49761	3.37203
	5.79899	5.4113	7.96541	7.57477	3.36412	3.59549	6.27837	3.15868	7.4763		4.37716	3.74495	4.68057	5.68558
	5.22389	7.24076	7.81817	3.66833	6.11424	5.12335	6.49913	4.56188	5.51422		7.10251	6.73125	5.71686	4.8363
	4.53567	7.22197	8.2253	1.96826	3.59926	6.21895	8.07464	3.52235	6.17782		7.17082	6.68956	5.79089	6.43953
	6.67345	7.80016	7.69035	7.16693	3.3861	8.19438	5.51219	6.80667	6.82099		5.42978	4.05568	7.76217	3.9368
	6.85947	6.57022	5.12116	4.08621	4.36906	3.73514	4.77936	3.96243	6.08636		5.3496	5.33886	6.64515	8.18126
	7.84425	7.52795	6.06292	6.85508	5.01125	7.44716	7.19889	5.25191	7.22729		5.52379	7.06217	6.55864	6.56867
	6.85252	5.01947	7.56775	7.46902	6.5249	4.61006	7.07789	4.27978	5.64163		5.74704	4.13658	5.97291	5.64277
	5.51496	7.49967	7.41422	5.46826	6.13064	6.22232	5.91195	7.95379	7.22462		6.4794	6.32817	5.3843	5.32623
	7.69406	8.07083	5.80881	2.94909	4.6455	5.74131	5.54821	5.2408	7.94902		4.57095	5.16457	7.85103	5.96716
	4.43592	5.94674	6.37302	7.89251	4.43809	5.10848	8.35805	7.02842	4.65384		6.57375	5.5107	7.41833	4.30735
	6.60925	7.83895	4.5168	3.94216	6.65855	6.31738	5.01552	7.68229	7.96916		3.73623	6.2658	6.43704	5.35178
	7.37246	6.92087	6.92282	7.45714	6.01356	7.33943	7.52184	5.75898	6.0873		3.36729	5.93358	6.37271	3.56349
	5.78216		6.40098	2.99834	5.8341	4.9553	6.75874	6.09187	7.71753		5.6387	6.51455	4.9707	5.52067
	5.43058		7.74145	6.87775	5.27683	6.78771	6.43136	5.16928	5.76849		4.4842	5.20013	6.96443	5.81156
	7.49891		7.614	5.74821	6.54929	4.09923	8.0702	6.7697	4.23096		6.37896	5.21868	3.1988	7.25889
	8.45407		6.15138	5.58281	6.24981	6.15995	6.81979	5.89416	5.67901		5.19174	3.44636	4.16406	7.18278
	7.16129		7.66819	6.22023	7.65938	5.40658	5.95498	6.82334	7.19696		5.09507	2.75028	3.15281	3.58153
	5.54696		5.84585	4.14606	7.10966	5.62754	5.98522	8.03923	8.09546		8.26724	6.52638	7.5355	2.7444
	7.99031		4.83957	7.01544	8.20426	7.45688	7.52288	6.47113	6.50601		6.67582	4.78244	4.69326	5.51662
	7.6524		5.81909	5.31117	7.95502	7.20053	7.47442	4.74365	4.84897		5.88642	2.95149	5.98764	5.59362
	8.22615		6.95764	6.25801	4.85076	4.80523	6.6828	4.54935	4.68778		8.09632	4.02991	6.98414	5.17553
	6.82144		7.33099	7.57881	5.24709	5.88871	4.88395	7.43878	6.89128		6.18209	3.33022	3.94038	5.74352
	5.29794		7.56101	3.43755	7.17114	5.86504	6.00057	4.39431	6.51516		6.77569	2.84799	3.50319	3.93501
	7.36069		4.91875	4.127	6.28924	7.66913	7.08348	7.36104	4.90796		4.20665	4.3644	3.28315	7.47775
	6.06196		7.18716	5.24347	6.71241	6.27578	7.1175	6.22659	6.2129		5.25215	5.39769	5.28151	4.67887
	5.37818		6.46857	6.23894	6.79452	6.11292	5.45912	5.61858	7.39752		7.53172	4.14243	4.93571	3.33677
	5.98545		7.07974	8.14152	4.51479	6.66588	5.29679	5.79606	5.92356		5.67162	5.16536	5.09479	3.10461
	7.71009		4.0738	4.72794	4.4764	6.67397	2.99375	4.83957	6.99252		6.61437	5.41376	7.75488	3.81408
	6.35842		5.02763	6.48726	6.63272	8.09481	3.37517	7.18068	6.83747		6.39495	4.93373	4.03642	4.31658
	6.65996		7.75841	7.27672	5.74968	7.70021	4.2376	8.20785	5.19632		4.87768	4.33358	5.46554	5.06279
			5.0461	7.41974	6.59593	5.18559	7.13696	5.78498	5.51791		3.32528	7.56387	6.531	5.81854
			5.26124	7.70104	6.87273	6.66248	5.12798	5.39935	7.6638		7.37666	7.8326	4.97515	4.79162
			4.23827	7.72966	7.32206	5.50437	6.2658	6.52496	7.28023		5.28058	7.22572	3.93232	5.28338
			5.05228	5.42292	6.7469	7.71853	5.89327	7.25465	8.16299		3.82915	7.98166	4.57332	6.21088
			6.8811	5.48019	4.80034	7.21912	7.36885	6.78973	5.84226		7.02919	7.35004	5.37839	7.41875
			3.26579	8.07953	7.37462	7.60766	6.5054	6.50978	5.49311		6.49158	3.95367	3.7085	8.18831
			4.84428	6.16536	6.49657	7.57349	7.43816	5.64748	5.52232			4.73723	3.96505	5.87887
			3.32693	5.12798	5.15403	7.46556	6.55877	7.32542	7.53961			6.5378	3.80901	6.57918
			4.77201	5.85022	5.78555	5.23739	7.10217	7.49616	5.77904			3.0029	5.95093	4.65209
			4.69368	4.31043	6.56085	4.4909	7.6375	7.73692	7.39253			5.42352	6.05649	7.18096
			5.74058	4.72591	1.68909	5.29426	6.97821	4.94294	5.50866			6.36334	6.25942	6.34659
			6.98838	6.65045	5.67681	6.08018	7.23691	7.05233	7.46264			6.67605	5.87617	3.21735
			6.67831	6.94477	6.85682	5.98233	7.05811	7.18459	5.91443			4.28232	6.13293	6.48291
			3.76322	6.83263	7.80649	6.86471	7.75557	5.95117	8.30221			4.19149	6.28121	4.79048
			7.35449	6.3053	7.55702	5.71957		4.13878	6.23256			4.7328	7.00746	7.50435
			5.72542	7.07486	8.10446	5.72092		3.57384				5.93831	6.19771	4.10455
			5.04581	6.92128	4.53222	8.10259		6.20153				3.03208	7.9307	5.38703
			7.0648	7.89042	6.06314	7.77393		4.31841				3.82215	7.55934	3.76535
			4.6187	6.94149	4.78051	6.00973		7.64361				5.34676	6.53027	7.71409
			5.63428	7.82101	5.48667	5.03153		4.13291				5.1228	4.94392	6.00057
			5.76605	7.58947	6.40645	4.91168		5.51662				4.65733	6.92872	3.1837
			6.06878	8.04743	7.88693	6.58623		6.58382				6.47162	5.41171	4.35972
			7.80419	7.30964	5.95712	6.39854		5.48951				7.94383	4.22828	6.8515
			6.8723	8.17485	7.58148	4.91236		5.81019				5.34633	7.89877	3.46662
			5.64098	5.72348	7.42831	7.15865		5.06105				5.2693	6.11687	6.98956
			6.96768	5.07692	3.89568	8.41937		3.98828				6.97422	3.85669	5.0729
			7.40268	6.98787	4.35325	5.78991		7.55719				3.95543	5.97641	5.86543
			5.23078	4.22895	5.63903	6.05208		7.15557				5.45029	6.84989	5.0384
			6.87372	4.89603	6.39816	7.29819		6.79267				8.07021	4.5208	4.86926
			6.67159	6.65966	7.32242	7.32388		4.36148				3.39998	8.12448	6.85009
			8.03567	5.35958	5.09339	5.58694		5.73422				5.25647	7.13356	5.76921
			3.32528	5.92858	6.27033	6.68061		6.33998				5.24395	5.64958	6.34361
			7.61865	6.52456	6.85933	4.88845		7.58386				5.03482	3.64223	6.83179
			2.65497	7.04667	5.86217	4.68694		4.03398				3.844	6.486	4.61371
			4.3092	6.04046	6.53521	5.63494		7.0856				3.83015	6.78942	5.652
			4.80147	5.45833	5.41294	7.67968		5.44416				4.62141	4.90694	6.41309
			3.96766	7.87093	3.70286	6.36492		7.51156				4.70992		4.5158
			5.70577	6.195	7.71017	6.10803		6.63024				7.08959		7.27421
			5.81581	5.8845	4.35679	6.36957		7.56137				7.34588		7.13816
			3.0901	7.34925	6.61794	4.62366		7.66203				5.04107		5.51754
			3.52099	4.77084	4.74245	6.59222		7.96267				6.99811		7.80312
			7.04143	7.30678	3.62649	6.16363						6.05574		6.94038
			3.77486	5.76072	4.87172	6.3938						7.41023		6.41512
			2.93943	7.60007	6.48305	7.01593						6.88477		6.8625
			5.27378	4.95368	5.77035	8.53607						7.0549		6.6875
			6.30647	8.29614	4.79845	6.87206						4.48988
			7.03401	5.54014	6.31331	5.74131						5.79327
			7.43613	6.82588	6.45747	7.17191						7.67922
			4.78589	7.72797	7.25286	6.56745						4.17681
			5.02612	6.5561	5.55142	7.10771						6.10496
			5.07978	7.61561	4.05409	7.53029						6.53933
			7.80689	7.90081	6.16844	7.64729						4.20459
			6.72074	6.70474	6.55355	7.54387						4.87383
			4.62591	3.99674	4.9707	6.73038						7.66793
			3.27798	7.71393	5.57657	6.92359						6.67409
			3.54379	4.31963	7.39058	5.14845						5.58866
			5.33068	5.436	6.77202	7.15675						6.43696
			4.65907	7.48445	6.32702	5.15297						5.23348
			7.4955	8.11423	5.08234	5.72423						6.99643
			5.01217	7.4837	6.2393	7.50839						7.56628
			3.53044	4.12774	7.55745	6.6355						7.58375
			3.37987	5.2298	6.1582	5.60787						6.75243
			4.55612	7.42912	4.70412	7.63006						8.05736
			7.96989	5.57605	3.53044	5.85851
			7.58403	6.15363	5.51791	6.45307
			3.42866	8.35881	6.96984	6.52058
			6.09674	7.54987	7.13026	8.03809
			4.99895	6.49436	4.58087	6.51046
			4.68482	7.62823	7.76006	6.58787
			4.36031	5.17553	7.24392	2.90736
			4.68439	8.02202	6.41797	5.16745
			6.76749	7.95937	6.00057	6.59906
			3.73185	5.53725	6.45934	4.00095
			6.8649	4.40108	5.41682	7.15532
			4.66513	5.44989	7.52224	4.95271
			6.38671	7.59475	7.59924	7.01696
			7.05249	6.28941	4.89637	5.1431
			5.31614	4.68142	7.02874	5.83732
			4.88707	3.27103	4.42389	4.37889
			6.24154	7.5717	5.26765	2.65497
			7.36113	3.88348	6.39846	7.69163
			6.86576	7.04695	4.64989	2.80451
			7.51796	8.43495	7.9106	7.52761
			7.53447	6.15314	7.70702	5.0962
			7.50362	4.97578	7.00066	6.26231
				4.19634	4.9367	4.22694
				6.9815	4.18802	7.423
				7.13509	6.18974	6.80515
				6.93043	3.34812	6.29341
				7.46511	6.75184	7.12047
				8.27428	3.05397	5.68542
				5.50176	5.90922	6.73322
				6.54982	6.17171	7.56758
				7.61255	6.33998	3.88348
				6.12433	5.17033	5.05638
				5.10208	4.75517	8.23147
				6.61934	7.40845	7.93906
				4.20116	4.7202	5.47674
				6.73158	7.0963	7.69515
				6.72906	5.93163	3.07113
				6.10219	7.7229	7.73295
				4.53764	7.43127	6.55721
				5.88858	5.73555	6.57509
				6.46157	5.15297	4.31474
				7.31463	7.58129	5.69024
				7.53401	3.32693	3.5358
				6.91811	6.72212	7.81396
				6.59254	3.59043	6.24484
				7.78246	4.9367	7.03065
				8.57078	6.17218	4.01264
				7.77777	4.54595	5.58832
					4.71734	6.87505
					6.27759	4.17187
					5.62207	5.99567
					6.36144	6.82374
					6.79975	7.50238
					6.87813	6.37693
					5.94109	6.65914
					4.42828	6.95213
					7.27354	5.40369
					7.04567	4.12032
					5.28268	3.56997
					6.66588	4.53123
					7.22649	3.46519
					5.92405	4.56093
					6.80515	6.43025
					5.25263	7.9075
					6.42966	5.22734
					7.99671	6.18257
					6.29239	5.72662
					1.64579	7.73413
					3.73951	7.62705
					5.2157	6.57163
					4.17752	5.4217
					7.87451	7.19635
					6.28241	4.92577
					6.93758	7.19283
					7.42004	7.31963
					5.51404	6.77448
					5.52927	4.2209
					4.04369	5.16457
					4.73764	6.68234
					6.61407	6.81361
					4.41561	6.39854
					5.44515	6.59204
					5.158	5.35785
					8.1198	5.64812
					6.84887	5.27237
					5.98499	8.15742
					6.10383	6.03991
					3.97716	6.76632
					3.51145	6.3494
					6.48495	7.1825
					2.26551	8.00818
					6.23355	6.60436
					8.15177	5.05843
					6.21565	6.01703
					6.16227	5.78682
					5.37138	6.17257
					6.86753	5.6082
					5.67477	5.37308
					5.51015	6.22114
					6.03289	6.39088
					6.8768	5.58608
					7.10737	5.33046
					6.03696	7.95624
					5.93589	6.30722
					7.14198
					4.85685
					7.06746
					3.70962
					6.60832
					4.00848
					5.66972
					6.58977
					4.09313
					6.24573
					5.83558
					4.90728
					5.06598
					6.52879
					5.52836
					7.06953
					7.28685
					6.08948
					7.5834
					6.89936
					6.57311
					4.6827
					4.87733
					8.35186
					5.87694
					7.75736
					7.42114
					4.97736
					6.66746
					3.39537
					4.84247
					4.85542
					2.79614
					4.37774
					6.16796
					4.65252
					6.52732
					4.70744
					7.16054
					6.25493
					7.81496
					5.6776
					6.50786
					7.28427
					5.88934
					6.04427
					6.2129
					5.72602
					5.79982
					6.14835
					6.97949
					6.22913
					6.94406
					6.03168
					7.36998
					3.95981
					7.85548
					6.94087
					4.07769
					4.49501
					4.93241
					7.17402
					7.9422
					6.1741
					6.23112
					7.56938
					7.38544
