# Supplementary material for: UBP12 and UBP13 negatively regulate the activity of the ubiquitin-dependent peptidases DA1, DAR1 and DAR2
Source: eLife. 2020 Mar 25;9:e52276. doi: 10.7554/eLife.52276 (PMC7141810; doi:10.7554/eLife.52276)
Supplement: Figure 2—source data 2. [file elife-52276-fig2-data2.xlsx]

## Sheet: F2_FS1 Leaf index da1-1
	Leaf blade length							Statistical analysis
	Col-0			da1-1				Table Analyzed	Leaf blade index da1-1
	R1	R2	R3	R1	R2	R3
	5.528	6.047	5.94	6.158	6.6595	6.686		Column B	da1-1
	5.4565	6.376	6.445	6.461	6.092	6.041		vs.	vs,
	5.282	5.9345	5.505	5.1	6.9325	7.248		Column A	Col-0
	5.0585	5.53	5.382	5.5775	6.004	6.719
	5.2155	6.6035	5.308	6.4995	6.406	6.594		Unpaired t test
	6.097	6.0615	6.076	6.068	7.266	6.248		P value	<0,0001
	5.7935		6.06			6.355		P value summary	****
								Significantly different (P < 0.05)?	Yes
	Leaf blade width							One- or two-tailed P value?	Two-tailed
								t, df	t=5,844, df=12
	Col-0			da1-1
	R1	R2	R3	R1	R2	R3		How big is the difference?
	5.6345	5.922	6.222	7.3695	7.9045	8.149		Mean of column A	0.9693
	5.8885	6.8185	6.856	7.5985	7.73	7.655		Mean of column B	0.821
	5.6605	6.423	6.247	6.7665	8.5625	8.134		Difference between means (B - A) ± SEM	-0,1483 ± 0,02539
	5.59	5.9345	5.579	7.196	7.7705	8.203		95% confidence interval	-0,2037 to -0,09304
	5.4915	6.649	5.813	7.743	7.626	7.516		R squared (eta squared)	0.74
	6.1715	6.2365	6.503	7.1495	8.108	7.977
	4.603		6.407			7.918		F test to compare variances
								F, DFn, Dfd	7,725, 6, 6
	Leaf blade index							P value	0.0252
								P value summary	*
	Col-0			da1-1				Significantly different (P < 0.05)?	Yes
	R1	R2	R3	R1	R2	R3
	0.981099	1.02111	0.954677	0.835606	0.842495	0.820469		Data analyzed
	0.926637	0.935103	0.940053	0.850299	0.788098	0.789157		Sample size, column A	7
	0.933133	0.923945	0.881223	0.753713	0.809635	0.891075		Sample size, column B	7
	0.904919	0.931839	0.964689	0.775083	0.772666	0.819091
	0.949741	0.993157	0.913126	0.839403	0.840021	0.877328
	0.987928	0.971939	0.934338	0.848731	0.896152	0.783252
	1.25864		0.94584			0.802602

## Sheet: F2_FS1 Leaf index 35S-UBP12-13
	Leaf blade length																Statistical analysis
	Col-0			35S::UBP13_1.1			35S::UBP13_2.3			35S::UBP12_3.1			35S::UBP12_3.2				ANOVA results
	R1	R2	R3	R1	R2	R3	R1	R2	R3	R1	R2	R3	R1	R2	R3
	6.256	6.406	7.051	6.003	5.647	5.637	4.866	5.282	4.105	5.685	5.443	5.158	5.709	5.582	5.292		Table Analyzed	Leaf blade index 35S-UBP13/12
	7.231	6.331	6.683	5.286	5.35	5.277	4.196	4.74	4.81	6.442	5.443	5.174	4.779	5.65	5.53
	6.698	6.545	6.435	6.534	5.227	6.268	3.926	5.222	5.244	5.718	5.265	5.515	5.558	5.484	4.977		Two-way ANOVA	Ordinary
	6.807	7.061	6.755	5.118	5.277	4.1	4.608	4.77	5.615	6.135	5.182	5.805	4.731	5.76	5.268		Alpha	0.05
	6.927	6.911	7.034	4.744	5.237	4.612	4.619	5.416	5.315	5.566	5.549	6.004	5.145	5.689	5.241
	7.285	7.22	6.589	5.371	5.253	4.549	4.218	4.541	5.214	4.601	5.8	5.725	5.245	5.618	5.307		Source of Variation	% of total variation	P value	P value summary	Significant?
	6.875	5.575	6.672	5.263	5.858	4.319	4.632	4.324	4.734	5.434	5.564	5.367	5.938	5.611	5.291		Interaction	19.06	0.1365	ns	No
	6.004	6.102	6.674	5.135	5.879	3.629	4.233	4.555	4.819	6.319	4.122	6.214	5.523	5.629	4.789		Row Factor	6.653	0.0467	*	Yes
	7.368	6.852	6.362		4.864	4.847	5.876	5.312	4.623	4.44	4.558		5.054	5.768	4.9		Column Factor	38.1	<0,0001	****	Yes
	6.332	6.093	6.785		4.577	5.286	3.998	4.592	5.411		6.025		5.212	6.113	4.99
	6.468	6.368	5.512		5.142	4.443	4.827	5.012	4.615		4.194		5.38	5.708	4.924		ANOVA table	SS (Type III)	DF	MS	F (DFn, DFd)	P value
	7.017	5.581	6.858		5.137	4.69	4.365	4.382	5.004		4.853		5.071	5.235	5.564		Interaction	0.3732	60	0.006219	F (60, 129) = 1,263	P=0,1365
	6.094	5.918	6.667			4.984	4.589	4.615	4.832		5.665		4.975	5.244	5.186		Row Factor	0.1303	15	0.008684	F (15, 129) = 1,764	P=0,0467
	6.984	6.795	6.898			5.273	4.016	4.691	5.078		4.906		5.291	5.924	5.121		Column Factor	0.7459	4	0.1865	F (4, 129) = 37,88	P<0,0001
	6.792	6.064	4.797			4.599		4.75			4.688		5.63	5.325	5.198		Residual	0.635	129	0.004922
	6.737	6.484	7.481			4.944		4.315			4.875		5.079	5.467	4.629
																	Multiple comparisons
	Leaf blade width
																	Compare column means (main column effect)
	Col-0			35S::UBP13_1.1			35S::UBP13_2.3			35S::UBP12_3.1			35S::UBP12_3.2
	R1	R2	R3	R1	R2	R3	R1	R2	R3	R1	R2	R3	R1	R2	R3		Number of families	1
	7.449	6.328	7.521	6.496	6.501	5.775	6.051	6.369	5.557	6.663	6.183	6.415	6.869	6.164	6.083		Number of comparisons per family	4
	7.45	6.429	7.21	4.461	5.128	6.386	5.838	6.261	6.027	7.223	6.718	6.171	5.791	6.755	6.404		Alpha	0.05
	6.976	6.675	6.929	6.933	6.553	6.795	5.59	5.958	7.049	6.156	6.476	6.598	6.877	6.31	6.132
	6.925	6.94	7.775	4.804	6.155	4.363	6.155	5.809	6.325	7.019	6.181	7.036	6.048	6.367	6.019		Dunnett's multiple comparisons test	Mean Diff,	95,00% CI of diff,	Significant?	Summary	Adjusted P Value
	7.253	6.599	6.947	4.468	6.481	4.564	6.059	5.911	6.358	6.533	6.838	6.178	6.142	6.078	6.616
	7.205	6.842	6.928	4.954	5.255	5.623	5.984	5.407	6.608	5.556	6.83	6.809	6.567	6.665	6.221		Col-0 vs. 35S::UBP13_1.1	0.0554	0,01466 to 0,09614	Yes	**	0.0037
	7.493	6.027	7.072	5.135	5.428	4.639	6.124	5.692	6.092	5.483	6.814	6.56	6.341	6.522	6.319		Col-0 vs. 35S::UBP13_2.3	0.1757	0,1380 to 0,2134	Yes	****	<0,0001
	6.723	6.339	6.584	4.831	6.494	3.044	6.03	6.062	6.369	7.144	4.197	7.141	6.72	6.29	5.932		Col-0 vs. 35S::UBP12_3.1	0.1023	0,05942 to 0,1451	Yes	****	<0,0001
	7.647	6.352	6.632		6.096	6.048	6.859	5.91	5.78	5.518	4.653		6.407	6.291	6.452		Col-0 vs. 35S::UBP12_3.2	0.1177	0,08213 to 0,1532	Yes	****	<0,0001
	6.623	6.116	6.968		5.54	4.531	4.963	5.789	6.595		6.929		6.09	6.775	6.106
	7.137	6.516	5.864		6.341	5.795	5.636	5.782	6.362		5.226		5.837	6.29	6.151
	7.203	6.05	6.948		6.396	6.007	5.942	5.519	6.204		6.048		6.205	6.185	6.622		Test details	Mean 1	Mean 2	Mean Diff,	SE of diff,	N1	N2	q	DF
	6.591	6.522	6.774			6.084	5.862	5.835	6.197		6.757		6.517	6.145	6.393
	6.834	6.449	7.316			6.516	6.009	5.615	6.621		6.251		6.696	6.718	5.523		Col-0 vs. 35S::UBP13_1.1	0.9638	0.9084	0.0554	0.01641	48	36	3.377	129
	7.042	6.038	5.731			4.761		6.106			4.306		6.047	5.957	6.034		Col-0 vs. 35S::UBP13_2.3	0.9638	0.7881	0.1757	0.01519	48	44	11.57	129
	7.512	6.473	7.56			6.248		5.546			6.081		6.151	7.394	6.075		Col-0 vs. 35S::UBP12_3.1	0.9638	0.8615	0.1023	0.01726	48	33	5.925	129
																	Col-0 vs. 35S::UBP12_3.2	0.9638	0.8461	0.1177	0.01432	48	48	8.218	129
	Leaf index
	Col-0			35S::UBP13_1.1			35S::UBP13_2.3			35S::UBP12_3.1			35S::UBP12_3.2
	R1	R2	R3	R1	R2	R3	R1	R2	R3	R1	R2	R3	R1	R2	R3
	0.839844	1.01233	0.93756	0.924107	0.869	0.976	0.804165	0.82933	0.738709	0.853	0.88	0.804	0.831	0.906	0.87
	0.970604	0.984757	0.926954	1.18494	1.043	0.826	0.718739	0.757068	0.798004	0.892	0.81	0.838	0.825	0.836	0.864
	0.960149	0.980524	0.928705	0.942449	0.798	0.922	0.702326	0.876469	0.743933	0.929	0.813	0.836	0.808	0.869	0.812
	0.98296	1.01744	0.868796	1.06536	0.857	0.94	0.74866	0.82114	0.887739	0.874	0.838	0.825	0.782	0.905	0.875
	0.955053	1.04728	1.01259	1.06177	0.808	1.011	0.762337	0.916258	0.835924	0.852	0.811	0.972	0.838	0.936	0.792
	1.0111	1.05525	0.951054	1.08417	1	0.809	0.70488	0.839837	0.789124	0.828	0.849	0.841	0.799	0.843	0.853
	0.917523	0.925004	0.943373	1.02493	1.079	0.931	0.756368	0.759663	0.777135	0.991	0.817	0.818	0.936	0.86	0.837
	0.893054	0.962612	1.01376	1.06293	0.905	1.192	0.70199	0.751402	0.756637	0.885	0.982	0.87	0.822	0.895	0.807
	0.963515	1.07872	0.959253		0.798	0.801	0.856685	0.898816	0.799833	0.805	0.98		0.789	0.917	0.759
	0.956062	0.996239	0.973836		0.826	1.167	0.805561	0.793229	0.820416		0.87		0.856	0.902	0.817
	0.906263	0.977287	0.94003		0.811	0.767	0.856458	0.866828	0.725355		0.803		0.922	0.907	0.801
	0.974177	0.922479	0.987112		0.803	0.781	0.734601	0.793984	0.806581		0.802		0.817	0.846	0.84
	0.924594	0.90739	0.984177			0.819	0.782839	0.790917	0.779761		0.838		0.763	0.853	0.811
	1.02195	1.05365	0.942878			0.809	0.668331	0.835441	0.766984		0.785		0.79	0.882	0.927
	0.964499	1.00431	0.837147			0.966		0.777923			1.089		0.931	0.894	0.861
	0.896832	1.0017	0.989556			0.791		0.778038			0.802		0.826	0.739	0.762

## Sheet: F2_FS3 Rel expression UBP12-13
Expression data								Statistical analysis
	UBP12			UBP13				Table Analyzed	Col-0 background UBP12-13
	mean	SEM	n	mean	SEM	n
Col-0	0.074133	0.002433	3	0.137	0.009404	3		Two-way ANOVA	Ordinary
da1-1	0.075467	0.002697	3	0.121667	0.006119	3		Alpha	0.05
35S::UBP12_3.1 (+/+)	0.563333	0.103399	3	0.1018	0.009619	3
35S::UBP12_3.2 (+/+)	0.494667	0.128595	3	0.075567	0.014667	3		Source of Variation	% of total variation	P value	P value summary	Significant?
35S::UBP12_1.1 (+/-)	0.842667	0.093026	3	0.0759	0.009425	3		Interaction	76.12	<0,0001	****	Yes
35S::UBP12_1.1 (+/+)	0.759	0.105235	3	0.0803	0.011534	3		Row Factor	16.16	<0,0001	****	Yes
35S::UBP13_1.1 (+/-)	0.079233	0.011112	3	0.865	0.12079	3		Column Factor	0.2369	0.2671	ns	No
35S::UBP13_1.1 (+/+)	0.081567	0.003066	3	0.799	0.101195	3
35S::UBP13_2.3 (+/-)	0.0731	0.007711	3	0.545667	0.022703	3		ANOVA table	SS	DF	MS	F (DFn, DFd)	P value
35S::UBP13_2.3 (+/+)	0.0811	0.01318	3	0.632667	0.05166	3		Interaction	4.64	9	0.5156	F (9, 40) = 45,22	P<0,0001
								Row Factor	0.985	9	0.1094	F (9, 40) = 9,600	P<0,0001
								Column Factor	0.01444	1	0.01444	F (1, 40) = 1,267	P=0,2671
								Residual	0.456	40	0.0114
								Difference between column means
								Mean of UBP12	0.3124
								Mean of UBP13	0.3435
								Difference between means	-0.03103
								SE of difference	0.02757
								95% CI of difference	-0,08675 to 0,02469
								Within each column, compare rows (simple effects within columns)
								Number of families	2
								Number of comparisons per family	9
								Alpha	0.05
								Dunnett's multiple comparisons test	Mean Diff,	95,00% CI of diff,	Significant?	Summary	Adjusted P Value
								UBP12
								Col-0 vs. da1-1	-0.001334	-0,2465 to 0,2438	No	ns	>0,9999
								Col-0 vs. 35S::UBP12_3.1 (+/+)	-0.4892	-0,7343 to -0,2441	Yes	****	<0,0001
								Col-0 vs. 35S::UBP12_3.2 (+/+)	-0.4205	-0,6657 to -0,1754	Yes	***	0.0002
								Col-0 vs. 35S::UBP12_1.1 (+/-)	-0.7685	-1,014 to -0,5234	Yes	****	<0,0001
								Col-0 vs. 35S::UBP12_1.1 (+/+)	-0.6849	-0,9300 to -0,4397	Yes	****	<0,0001
								Col-0 vs. 35S::UBP13_1.1 (+/-)	-0.0051	-0,2502 to 0,2400	No	ns	>0,9999
								Col-0 vs. 35S::UBP13_1.1 (+/+)	-0.007434	-0,2526 to 0,2377	No	ns	0.9999
								Col-0 vs. 35S::UBP13_2.3 (+/-)	0.001033	-0,2441 to 0,2462	No	ns	>0,9999
								Col-0 vs. 35S::UBP13_2.3 (+/+)	-0.006967	-0,2521 to 0,2382	No	ns	0.9999
								UBP13
								Col-0 vs. da1-1	0.01533	-0,2298 to 0,2605	No	ns	0.9997
								Col-0 vs. 35S::UBP12_3.1 (+/+)	0.0352	-0,2099 to 0,2803	No	ns	0.9994
								Col-0 vs. 35S::UBP12_3.2 (+/+)	0.06143	-0,1837 to 0,3066	No	ns	0.9871
								Col-0 vs. 35S::UBP12_1.1 (+/-)	0.0611	-0,1840 to 0,3062	No	ns	0.9876
								Col-0 vs. 35S::UBP12_1.1 (+/+)	0.0567	-0,1884 to 0,3018	No	ns	0.9918
								Col-0 vs. 35S::UBP13_1.1 (+/-)	-0.728	-0,9731 to -0,4829	Yes	****	<0,0001
								Col-0 vs. 35S::UBP13_1.1 (+/+)	-0.662	-0,9071 to -0,4169	Yes	****	<0,0001
								Col-0 vs. 35S::UBP13_2.3 (+/-)	-0.4087	-0,6538 to -0,1635	Yes	***	0.0003
								Col-0 vs. 35S::UBP13_2.3 (+/+)	-0.4957	-0,7408 to -0,2505	Yes	****	<0,0001
								Test details	Mean 1	Mean 2	Mean Diff,	SE of diff,	N1	N2	q	DF
								UBP12
								Col-0 vs. da1-1	0.07413	0.07547	-0.001334	0.08718	3	3	0.0153	40
								Col-0 vs. 35S::UBP12_3.1 (+/+)	0.07413	0.5633	-0.4892	0.08718	3	3	5.611	40
								Col-0 vs. 35S::UBP12_3.2 (+/+)	0.07413	0.4947	-0.4205	0.08718	3	3	4.824	40
								Col-0 vs. 35S::UBP12_1.1 (+/-)	0.07413	0.8427	-0.7685	0.08718	3	3	8.815	40
								Col-0 vs. 35S::UBP12_1.1 (+/+)	0.07413	0.759	-0.6849	0.08718	3	3	7.856	40
								Col-0 vs. 35S::UBP13_1.1 (+/-)	0.07413	0.07923	-0.0051	0.08718	3	3	0.0585	40
								Col-0 vs. 35S::UBP13_1.1 (+/+)	0.07413	0.08157	-0.007434	0.08718	3	3	0.08527	40
								Col-0 vs. 35S::UBP13_2.3 (+/-)	0.07413	0.0731	0.001033	0.08718	3	3	0.01185	40
								Col-0 vs. 35S::UBP13_2.3 (+/+)	0.07413	0.0811	-0.006967	0.08718	3	3	0.07991	40

## Sheet: F2_FS4 Leaf area ubp12-1
Leaf area data								Statistical analysis
	ubp12-1			Col-0				Table Analyzed	ubp12-1 ANOVA
	R1	R2	R3	R1	R2	R3
cot	11.6896	12.0591	12.7195	12.2419	10.0702	12.8603		Two-way ANOVA	Ordinary
1-2	58.1581	59.7355	73.8255	56.1169	47.39	70.005		Alpha	0.05
3	161.305	158.362	166.982	161.2	156.494	189.754
4	197.975	204.024	219.598	213.373	201.769	245.478		Source of Variation	% of total variation	P value	P value summary	Significant?
5	265.909	276.061	292.819	283.446	277.056	322.488		Interaction	0.9144	0.7747	ns	No
6	310.318	309.055	340.151	314.368	318.867	363.967		Row Factor	91.71	<0,0001	****	Yes
7	321.346	331.811	375.174	306.841	332.791	390.446		Column Factor	0.07042	0.4611	ns	No
8	353.318	346.813	393.626	293.701	338.428	400.981
9	280.215	295.59	366.547	243.245	282.59	333.21		ANOVA table	SS (Type III)	DF	MS	F (DFn, DFd)
10	215.842	207.836	280.633	162.093	211.681	270.402		Interaction	8140	11	740	F (11, 46) = 0,6520
11	179.137	184.115	286.769	110.494	148.393	209.779		Row Factor	816446	11	74222	F (11, 46) = 65,39
12		87.3755		55.7199	98.0044	144.767		Column Factor	626.9	1	626.9	F (1, 46) = 0,5524
13				30.9166	45.3121			Residual	52210	46	1135
14				15.9905	28.99
15				12.686	8.795			Difference between column means
								Predicted (LS) mean of ubp12-1	217
								Predicted (LS) mean of Col-0	210.8
								Difference between predicted means	6.143
								SE of difference	8.265
								95% CI of difference	-10,49 to 22,78
								Compare each cell mean with the other cell mean in that row
								Number of families	1
								Number of comparisons per family	12
								Alpha	0.05
								Sidak's multiple comparisons test	Predicted (LS) mean diff,	95,00% CI of diff,	Significant?	Summary	Adjusted P Value
								ubp12-1 - Col-0
								cot	0.432	-82,28 to 83,15	No	ns	>0,9999
								1-2	6.069	-76,65 to 88,79	No	ns	>0,9999
								3	-6.933	-89,65 to 75,78	No	ns	>0,9999
								4	-13.01	-95,72 to 69,71	No	ns	>0,9999
								5	-16.07	-98,78 to 66,65	No	ns	>0,9999
								6	-12.56	-95,28 to 70,16	No	ns	>0,9999
								7	-0.5824	-83,30 to 82,13	No	ns	>0,9999
								8	20.22	-62,50 to 102,9	No	ns	0.9995
								9	27.77	-54,95 to 110,5	No	ns	0.9899
								10	20.05	-62,67 to 102,8	No	ns	0.9995
								11	60.45	-22,26 to 143,2	No	ns	0.3319
								12	-12.12	-129,1 to 104,9	No	ns	>0,9999
								Test details	Predicted (LS) mean 1	Predicted (LS) mean 2	Predicted (LS) mean diff,	SE of diff,	N1	N2	t	DF
								ubp12-1 - Col-0
								cot	12.16	11.72	0.432	27.51	3	3	0.0157	46
								1-2	63.91	57.84	6.069	27.51	3	3	0.2206	46
								3	162.2	169.1	-6.933	27.51	3	3	0.252	46
								4	207.2	220.2	-13.01	27.51	3	3	0.4729	46
								5	278.3	294.3	-16.07	27.51	3	3	0.5841	46
								6	319.8	332.4	-12.56	27.51	3	3	0.4566	46
								7	342.8	343.4	-0.5824	27.51	3	3	0.02117	46
								8	364.6	344.4	20.22	27.51	3	3	0.7349	46
								9	314.1	286.3	27.77	27.51	3	3	1.01	46
								10	234.8	214.7	20.05	27.51	3	3	0.7287	46
								11	216.7	156.2	60.45	27.51	3	3	2.198	46
								12	87.38	99.5	-12.12	38.9	1	3	0.3116	46

## Sheet: F2_FS5 Leaf area ubp13-1
Leaf area data								Statistical analysis
	ubp13-1			Col-0
	R1	R2	R3	R1	R2	R3		Table Analyzed	ubp13-1 ANOVA
cot	12.9955	12.897	14.1836	10.129	12.3073	11.4992
1-2	75.3459	76.2403	88.0486	52.7398	60.6709	67.4186		Two-way ANOVA	Ordinary
3	174.674	192.523	190.031	160.018	200.112	178.056		Alpha	0.05
4	222.389	243.169	238.619	213.033	250.739	232.325
5	277.26	319.783	305.453	271.471	332.274	309.142		Source of Variation	% of total variation	P value	P value summary	Significant?
6	334.498	364.158	347.269	309.241	373.772	389.103		Interaction	0.4535	0.9717	ns	No
7	333.24	370.746	353.417	334.51	395.988	360.23		Row Factor	94.36	<0,0001	****	Yes
8	324.177	405.285	401.685	330.274	406.465	391.703		Column Factor	0.1235	0.2836	ns	No
9	261.898	340.23	344.842	274.3	356.102	341.619
10	215.252	270.054	306.806	199.427	248.052	255.609		ANOVA table	SS (Type III)	DF	MS	F (DFn, DFd)	P value
11	138.27	245.757	225.252	140.844	212.584	203.545		Interaction	5000	12	416.6	F (12, 51) = 0,3595	P=0,9717
12	62.9425	148.658	140.639	70.8936	118.375	127.509		Row Factor	1040213	12	86684	F (12, 51) = 74,79	P<0,0001
13	45.873	102.018	179.22	36.978	79.503			Column Factor	1361	1	1361	F (1, 51) = 1,175	P=0,2836
								Residual	59113	51	1159
								Difference between column means
								Predicted (LS) mean of ubp13-1	223.2
								Predicted (LS) mean of Col-0	214.8
								Difference between predicted means	8.436
								SE of difference	7.784
								95% CI of difference	-7,190 to 24,06
								Compare each cell mean with the other cell mean in that row
								Number of families	1
								Number of comparisons per family	13
								Alpha	0.05
								Sidak's multiple comparisons test	Predicted (LS) mean diff,	95,00% CI of diff,	Significant?	Summary	Adjusted P Value
								ubp13-1 - Col-0
								cot	2.047	-81,92 to 86,01	No	ns	>0,9999
								1-2	19.6	-64,36 to 103,6	No	ns	0.9998
								3	6.347	-77,62 to 90,31	No	ns	>0,9999
								4	2.693	-81,27 to 86,66	No	ns	>0,9999
								5	-3.464	-87,43 to 80,50	No	ns	>0,9999
								6	-8.731	-92,69 to 75,23	No	ns	>0,9999
								7	-11.11	-95,07 to 72,85	No	ns	>0,9999
								8	0.902	-83,06 to 84,86	No	ns	>0,9999
								9	-8.351	-92,31 to 75,61	No	ns	>0,9999
								10	29.67	-54,29 to 113,6	No	ns	0.9885
								11	17.44	-66,53 to 101,4	No	ns	>0,9999
								12	11.82	-72,14 to 95,78	No	ns	>0,9999
								13	50.8	-43,08 to 144,7	No	ns	0.7747
								Test details	Predicted (LS) mean 1	Predicted (LS) mean 2	Predicted (LS) mean diff,	SE of diff,	N1	N2	t	DF
								ubp13-1 - Col-0
								cot	13.36	11.31	2.047	27.8	3	3	0.07363	51
								1-2	79.88	60.28	19.6	27.8	3	3	0.7052	51
								3	185.7	179.4	6.347	27.8	3	3	0.2283	51
								4	234.7	232	2.693	27.8	3	3	0.09688	51
								5	300.8	304.3	-3.464	27.8	3	3	0.1246	51
								6	348.6	357.4	-8.731	27.8	3	3	0.3141	51
								7	352.5	363.6	-11.11	27.8	3	3	0.3996	51
								8	377	376.1	0.902	27.8	3	3	0.03245	51
								9	315.7	324	-8.351	27.8	3	3	0.3004	51
								10	264	234.4	29.67	27.8	3	3	1.068	51
								11	203.1	185.7	17.44	27.8	3	3	0.6272	51
								12	117.4	105.6	11.82	27.8	3	3	0.4252	51
								13	109	58.24	50.8	31.08	3	2	1.634	51

## Sheet: F2_FS6 Leaf area ubp13-2
Leaf area data								Statistical analysis
	ubp13-2			Col-0
	R1	R2	R3	R1	R2	R3		Table Analyzed	ubp13-2 ANOVA
cot	13.3224	13.3382	13.9346	13.718	11.7539	12.5486
1-2	64.7773	68.0395	73.5294	57.614	55.9981	59.1628		Two-way ANOVA	Ordinary
3	157.31	196.375	179.311	161.342	179.885	170.691		Alpha	0.05
4	208.499	259.405	232.133	219.089	240.585	230.016
5	274.299	328.063	293.588	272.586	311.313	284.307		Source of Variation	% of total variation	P value	P value summary	Significant?
6	312.033	361.066	353.103	317.887	344.888	331.819		Interaction	0.5196	0.9336	ns	No
7	340.281	398.512	395.116	318.9	353.195	346.373		Row Factor	91.4	<0,0001	****	Yes
8	355.54	415.629	439.507	313.386	369.257	347.127		Column Factor	0.6365	0.0132	*	Yes
9	263.308	369.86	382.364	261.765	326.005	311.861
10	204.955	289.525	302.273	189.123	267.539	236.185		ANOVA table	SS (Type III)	DF	MS	F (DFn, DFd)	P value
11	141.825	225.956	205.28	132.56	197.192	195.37		Interaction	5616	12	468	F (12, 49) = 0,4501	P=0,9336
12	57.1265	158.849		67.9106	127.88	102.418		Row Factor	987973	12	82331	F (12, 49) = 79,17	P<0,0001
13		84.783		41.8573	114.159	48.0873		Column Factor	6881	1	6881	F (1, 49) = 6,616	P=0,0132
14				26.349				Residual	50958	49	1040
								Difference between column means
								Predicted (LS) mean of ubp13-1	223.3
								Predicted (LS) mean of Col-0	203.7
								Difference between predicted means	19.67
								SE of difference	7.646
								95% CI of difference	4,302 to 35,03
								Compare each cell mean with the other cell mean in that row
								Number of families	1
								Number of comparisons per family	13
								Alpha	0.05
								Sidak's multiple comparisons test	Predicted (LS) mean diff,	95,00% CI of diff,	Significant?	Summary	Adjusted P Value
								ubp13-1 - Col-0
								cot	0.8583	-78,83 to 80,54	No	ns	>0,9999
								1-2	11.19	-68,49 to 90,88	No	ns	>0,9999
								3	7.026	-72,66 to 86,71	No	ns	>0,9999
								4	3.449	-76,24 to 83,13	No	ns	>0,9999
								5	9.247	-70,44 to 88,93	No	ns	>0,9999
								6	10.54	-69,15 to 90,22	No	ns	>0,9999
								7	38.48	-41,20 to 118,2	No	ns	0.8796
								8	60.3	-19,38 to 140,0	No	ns	0.2933
								9	38.63	-41,05 to 118,3	No	ns	0.8767
								10	34.63	-45,05 to 114,3	No	ns	0.9399
								11	15.98	-63,71 to 95,66	No	ns	>0,9999
								12	8.585	-80,51 to 97,68	No	ns	>0,9999
								13	16.75	-95,94 to 129,4	No	ns	>0,9999
								Test details	Predicted (LS) mean 1	Predicted (LS) mean 2	Predicted (LS) mean diff,	SE of diff,	N1	N2	t	DF
								ubp13-1 - Col-0
								cot	13.53	12.67	0.8583	26.33	3	3	0.0326	49
								1-2	68.78	57.59	11.19	26.33	3	3	0.425	49
								3	177.7	170.6	7.026	26.33	3	3	0.2668	49
								4	233.3	229.9	3.449	26.33	3	3	0.131	49
								5	298.6	289.4	9.247	26.33	3	3	0.3512	49
								6	342.1	331.5	10.54	26.33	3	3	0.4001	49
								7	378	339.5	38.48	26.33	3	3	1.461	49
								8	403.6	343.3	60.3	26.33	3	3	2.29	49
								9	338.5	299.9	38.63	26.33	3	3	1.467	49
								10	265.6	230.9	34.63	26.33	3	3	1.315	49
								11	191	175	15.98	26.33	3	3	0.6069	49
								12	108	99.4	8.585	29.44	2	3	0.2916	49
								13	84.78	68.03	16.75	37.24	1	3	0.4498	49

## Sheet: F2_FS7 Leaf area ubp13-3
Leaf area data								Statistical analysis
	ubp13-3			Col-0
	R1	R2	R3	R1	R2	R3		Table Analyzed	ubp13-3 ANOVA
cot	11.666	12.3701	12.9848	11.5447	11.1791	11.4606
1-2	60.1286	63.2871	73.5324	54.4759	53.9925	62.9215		Two-way ANOVA	Ordinary
3	161.832	171.999	178.761	164.579	166.258	174.776		Alpha	0.05
4	218.172	233.286	220.715	218.01	219.776	240.013
5	274.783	298.689	291.145	286.594	320.447	306.524		Source of Variation	% of total variation	P value	P value summary	Significant?
6	329.628	336.131	344.728	325.11	328.918	360.792		Interaction	0.1324	0.9997	ns	No
7	323.256	351.267	369.476	340.244	350.17	407.395		Row Factor	94.68	<0,0001	****	Yes
8	354.292	360.822	414.369	343.626	340.399	438.465		Column Factor	0.07493	0.3423	ns	No
9	296.759	300.233	366.48	285.213	302.562	388.039
10	193.101	252.041	299.667	217.598	238.767	317.219		ANOVA table	SS (Type III)	DF	MS	F (DFn, DFd)	P value
11	151.03	192.363	206.688	166.408	170.009	256.828		Interaction	1419	12	118.3	F (12, 49) = 0,1353	P=0,9997
12	88.4415	102.278	124.275	105.552	123.528	124.45		Row Factor	1015399	12	84617	F (12, 49) = 96,82	P<0,0001
13	53.76	44.8883			72.3084			Column Factor	803.6	1	803.6	F (1, 49) = 0,9195	P=0,3423
								Residual	42825	49	874
								Difference between column means
								Predicted (LS) mean of ubp13-1	210
								Predicted (LS) mean of Col-0	216.7
								Difference between predicted means	-6.721
								SE of difference	7.009
								95% CI of difference	-20,81 to 7,364
								Compare each cell mean with the other cell mean in that row
								Number of families	1
								Number of comparisons per family	13
								Alpha	0.05
								Sidak's multiple comparisons test	Predicted (LS) mean diff,	95,00% CI of diff,	Significant?	Summary	Adjusted P Value
								ubp13-1 - Col-0
								cot	0.9455	-72,10 to 73,99	No	ns	>0,9999
								1-2	8.519	-64,53 to 81,57	No	ns	>0,9999
								3	2.326	-70,72 to 75,38	No	ns	>0,9999
								4	-1.875	-74,92 to 71,17	No	ns	>0,9999
								5	-16.32	-89,37 to 56,73	No	ns	0.9999
								6	-1.444	-74,49 to 71,61	No	ns	>0,9999
								7	-17.94	-90,99 to 55,11	No	ns	0.9997
								8	2.331	-70,72 to 75,38	No	ns	>0,9999
								9	-4.114	-77,16 to 68,94	No	ns	>0,9999
								10	-9.592	-82,64 to 63,46	No	ns	>0,9999
								11	-14.39	-87,44 to 58,66	No	ns	>0,9999
								12	-12.84	-85,89 to 60,20	No	ns	>0,9999
								13	-22.98	-132,6 to 86,59	No	ns	>0,9999
								Test details	Predicted (LS) mean 1	Predicted (LS) mean 2	Predicted (LS) mean diff,	SE of diff,	N1	N2	t	DF
								ubp13-1 - Col-0
								cot	12.34	11.39	0.9455	24.14	3	3	0.03917	49
								1-2	65.65	57.13	8.519	24.14	3	3	0.3529	49
								3	170.9	168.5	2.326	24.14	3	3	0.09636	49
								4	224.1	225.9	-1.875	24.14	3	3	0.0777	49
								5	288.2	304.5	-16.32	24.14	3	3	0.676	49
								6	336.8	338.3	-1.444	24.14	3	3	0.05983	49
								7	348	365.9	-17.94	24.14	3	3	0.7431	49
								8	376.5	374.2	2.331	24.14	3	3	0.09656	49
								9	321.2	325.3	-4.114	24.14	3	3	0.1704	49
								10	248.3	257.9	-9.592	24.14	3	3	0.3974	49
								11	183.4	197.7	-14.39	24.14	3	3	0.5961	49
								12	105	117.8	-12.84	24.14	3	3	0.5321	49
								13	49.32	72.31	-22.98	36.21	2	1	0.6348	49

## Sheet: F2_FS1 Rel frequency CA ubp12-2
LN cell area							Relative frequency cell area								Statistical analysis
Col-0 R1	Col-0 R2	Col-0 R3	ubp12-2 R1	ubp12-2 R2	ubp12-2 R3		Bin center	Col-0			ubp12-2
6.50265	5.18431	8.47282	4.80147	9.13984	6.355		5	0.010989	0.0139535	0.014218	0.0368664	0.044	0.0147059		Table Analyzed	Average 3 repeats Cell distribution LN (bin = 1 from 5)
8.32973	3.9251	7.85841	8.1477	8.30522	6.97799		6	0.0879121	0.0976744	0.07109	0.165899	0.16	0.102941
7.1013	6.6326	6.83431	6.27665	8.36594	5.86971		7	0.291209	0.274419	0.28436	0.248848	0.344	0.245098		Two-way ANOVA	Ordinary
7.36523	6.34884	7.77212	7.53699	7.97151	6.2475		8	0.318681	0.32093	0.388626	0.37788	0.268	0.387255		Alpha	0.05
7.46962	8.20498	7.5063	8.03766	5.04875	8.4777		9	0.236264	0.255814	0.222749	0.165899	0.18	0.235294
8.01474	7.34523	8.8015	6.01546	5.27378	7.69456		10	0.0549451	0.0325581	0.0189573	0.00460829	0.004	0.0147059		Source of Variation	% of total variation	P value	P value summary	Significant?
7.90288	8.10278	8.5838	7.29545	6.01479	7.54714										Interaction	1.649	0.1501	ns	No
6.20922	8.8426	7.4135	6.84458	5.38514	8.49042										Row Factor	93.97	<0,0001	****	Yes
9.28681	7.58249	7.05664	8.48097	6.91214	8.81707										Column Factor	0.0001029	0.9813	ns	No
7.03853	8.01919	7.28481	8.60286	7.29992	6.94203
6.59931	8.668	8.6982	9.12735	7.72843	7.7778										ANOVA table	SS	DF	MS	F (DFn, DFd)	P value
8.22672	6.74814	6.8963	8.03772	6.72422	8.55493										Interaction	0.009627	5	0.001925	F (5, 24) = 1,804	P=0,1501
8.497	5.18405	7.63546	5.80412	6.60187	8.79863										Row Factor	0.5487	5	0.1097	F (5, 24) = 102,8	P<0,0001
6.1384	8.60196	8.75112	6.3104	6.22351	7.08633										Column Factor	6.009e-07	1	6.009e-07	F (1, 24) = 0,0005632	P=0,9813
8.92492	5.84412	6.01937	6.8613	9.27657	7.90623										Residual	0.02561	24	0.001067
8.79746	7.89287	7.8753	8.38703	6.23382	7.88219
6.97044	6.30706	7.40581	7.78066	6.11535	8.03551										Difference between column means
7.85499	9.11535	9.10512	7.12129	8.38276	7.03195										Mean of Col-0	0.1664
9.83951	6.68601	7.72623	8.09587	6.74905	7.68271										Mean of ubp12-2	0.1667
7.24706	8.02865	7.14741	8.43954	7.49197	6.74722										Difference between means	-0.0002584
8.55102	8.99179	8.18682	7.6352	6.85503	8.99522										SE of difference	0.01089
7.52694	8.77059	8.71628	8.19542	8.63013	8.15338										95% CI of difference	-0,02273 to 0,02221
6.31837	9.75504	7.42773	9.01605	7.19535	8.22701
7.4235	7.89717	7.077	7.28048	8.10648	8.63119
8.78288	8.31547	7.59258	7.64418	8.03404	8.69131
9.31383	7.20535	8.69909	8.33844	8.83512	6.47764										Compare each cell mean with the other cell mean in that row
7.49524	6.68532	8.06329	6.79328	8.00372	8.22424
8.32914	7.59086	7.02805	7.83145	5.88259	7.78436										Number of families	1
6.82324	7.47236	6.84448	8.66846	7.91895	7.60229										Number of comparisons per family	6
8.10557	7.40898	6.76828	7.90086	8.96391	8.91872										Alpha	0.05
9.08752	6.71252	8.93728	8.58353	8.42798	6.60367
7.92584	8.23363	8.17836	6.37732	5.9211	8.35749										Sidak's multiple comparisons test	Mean Diff,	95,00% CI of diff,	Significant?	Summary	Adjusted P Value
7.87784	7.20395	7.87131	7.48321	6.80688	7.16417
8.1521	7.72821	7.68326	6.8671	7.68324	7.99316										Col-0 - ubp12-2
7.88725	8.07725	8.31333	5.84837	5.91083	9.47766										5	-0.0188	-0,09524 to 0,05764	No	ns	0.9819
7.8274	9.87811	6.33201	8.83857	8.9412	7.1983										6	-0.05739	-0,1338 to 0,01905	No	ns	0.2255
6.54171	6.81888	7.40052	6.82916	7.02397	6.84355										7	0.004014	-0,07243 to 0,08045	No	ns	>0,9999
7.40984	8.86013	7.56159	8.6759	6.25467	5.75011										8	-0.001633	-0,07807 to 0,07481	No	ns	>0,9999
8.49712	7.31963	8.1996	8.22477	8.80524	4.53321										9	0.04454	-0,03190 to 0,1210	No	ns	0.4959
8.52928	8.47828	8.82375	5.98105	6.31373	8.32528										10	0.02772	-0,04873 to 0,1042	No	ns	0.8912
8.33011	8.51337	7.28134	5.15799	4.59626	7.50231
8.67727	8.53365	8.40854	8.37785	6.26047	8.95984
6.63411	7.08275	8.99961	7.79151	7.64935	7.74869										Test details	Mean 1	Mean 2	Mean Diff,	SE of diff,	N1	N2	t	DF
6.81668	8.04865	8.03143	6.43121	8.17174	6.76801
8.34916	7.80778	8.39948	8.5131	8.23156	6.89053										Col-0 - ubp12-2
6.08165	8.46187	7.51013	5.34172	6.6899	7.57307										5	0.01305	0.03186	-0.0188	0.02667	3	3	0.705	24
7.68083	8.53055	6.60516	8.54621	7.08179	7.65625										6	0.08556	0.1429	-0.05739	0.02667	3	3	2.152	24
7.38345	8.83361	7.27836	8.77785	4.85792	6.40182										7	0.2833	0.2793	0.004014	0.02667	3	3	0.1505	24
7.17729	7.46261	6.94451	6.16256	5.9254	8.46967										8	0.3427	0.3444	-0.001633	0.02667	3	3	0.06121	24
8.55307	8.55403	6.78107	7.05597	8.23113	5.37627										9	0.2383	0.1937	0.04454	0.02667	3	3	1.67	24
9.61099	9.18021	9.11134	7.60302	8.61267	9.22039										10	0.03549	0.007771	0.02772	0.02667	3	3	1.039	24
7.02123	6.60733	7.63843	8.97823	6.05896	7.90845
8.87333	9.39823	8.12444	8.41116	6.98273	8.67307
7.93739	8.1789	8.39179	7.55216	7.44569	6.89778
8.02215	7.18535	8.65296	6.50793	6.35117	7.92627
6.67229	9.21394	6.85373	8.23228	7.76648	7.31509
9.24231	8.77055	7.53839	8.64395	7.62667	6.10752
8.11548	6.27336	7.87803	8.15028	8.65894	8.79614
8.87567	6.2082	7.33117	7.69235	8.75426	6.41954
9.70804	6.10517	7.94796	6.43195	6.72323	7.93924
6.94065	7.15704	9.18736	7.18065	7.44852	6.68389
8.73702	7.37523	7.31765	6.79739	6.17257	9.12857
6.97663	9.25125	8.44323	5.30092	5.28663	8.75411
7.31421	6.92994	6.78039	7.48471	6.34563	8.01605
7.73516	7.42015	6.45653	6.03003	5.03183	8.52406
7.23244	9.39267	7.06436	7.36148	6.73981	8.53905
8.68011	8.12373	8.89905	9.0862	8.04926	7.92918
9.89711	8.72763	8.10317	7.09504	8.95105	7.97254
7.16594	9.17581	7.96856	9.2051	8.35496	8.47367
8.56491	6.98009	9.32146	8.48976	6.36097	9.37846
8.3698	8.25336	7.08966	7.6556	8.58761	6.28335
7.31908	6.92571	6.34659	7.7875	5.99692	6.09756
8.384	6.08979	7.71056	6.25052	5.86738	7.38242
7.18107	8.09801	8.97337	7.89323	6.69927	8.01126
6.62484	6.22823	8.62936	8.45312	6.56228	7.45106
6.10691	8.20181	7.42177	5.52269	8.99639	9.1324
6.84809	7.1981	8.36418	6.49602	8.56509	8.13234
7.41226	6.52409	7.40192	6.18058	6.99639	9.97061
7.13429	8.77459	8.35292	7.76515	7.22097	7.82568
9.68022	8.3457	6.91652	8.86552	7.85208	9.35035
6.99987	7.91942	7.29753	6.61689	7.46222	8.84851
6.66336	8.11205	7.75629	5.50643	7.16969	8.69606
9.00943	7.41524	7.80657	6.25933	8.02954	7.77386
9.24552	9.27034	8.61954	6.25388	6.80683	8.87551
5.27543	8.64349	8.81876	7.15044	6.09931	8.10701
9.04412	6.54495	6.28745	6.46999	7.83904	6.63628
8.76359	7.06491	7.93227	8.79131	6.50855	9.12421
7.39963	7.56877	7.64534	7.28804	6.69235	7.64703
6.41272	7.92411	8.20436	5.8485	6.9272	9.20867
6.63923	8.8014	7.37457	7.67626	9.38896	8.28235
8.38902	8.80443	8.961	6.56816	8.47917	8.72742
9.16577	7.40893	5.43459	6.47488	7.07564	7.8124
7.87042	6.07692	9.14369	7.52067	7.85188	7.67947
7.83866	6.55818	7.56637	7.31899	6.6859	9.16198
8.35944	8.57546	6.53	8.70015	6.417	7.32376
6.81456	8.45105	8.21259	8.1147	7.1782	7.95701
5.99966	8.50439	9.00688	5.47	7.60199	6.86624
7.83601	7.21265	6.32899	8.08361	7.38754	6.66582
7.58847	7.33036	8.41844	5.91703	6.1121	9.02149
8.56894	8.52964	8.90145	7.94881	7.90381	8.59244
9.0778	6.00544	6.61695	6.82941	8.05084	7.96635
6.72273	6.32768	8.09708	7.45428	5.27566	7.80348
6.91168	7.93621	7.91572	8.59397	4.69745	6.4645
7.80161	6.84326	5.98452	8.45441	5.2097	8.16076
7.77372	9.65588	6.3774	8.89315	6.59511	7.22016
9.52037	7.16054	5.25862	6.33949	6.79616	8.85897
8.33117	8.30491	7.42585	5.68433	7.67894	8.04752
6.3928	7.72954	7.90554	7.42823	7.32575	9.81837
7.50643	8.27126	7.0511	7.15231	6.17553	5.92036
7.81912	8.34947	8.91315	7.86144	8.47004	8.00581
9.84273	7.60682	6.84419	6.58705	5.22906	7.3389
8.53932	8.25626	6.33429	7.47866	7.68102	5.1651
8.51442	9.55071	7.57843	6.22478	8.62393	7.78537
8.70881	8.26158	8.76349	8.05826	6.83263	7.15339
9.03849	8.2121	7.10126	7.78745	9.12481	7.14386
8.9909	6.55642	7.46251	8.69033	8.72485	6.15138
7.33456	7.49664	8.91466	8.24137	6.28463	8.29312
7.13443	7.74478	7.96412	8.3048	7.25953	9.8049
8.31076	7.09176	8.91107	5.38997	5.87282	5.84479
9.19921	8.2052	6.40796	7.62841	7.63373	8.14061
8.51755	6.10783	6.77663	7.53866	9.00429	7.94975
8.7104	8.10646	8.22048	6.74808	8.29506	8.10907
6.76262	8.7661	8.14738	8.81168	7.28848	7.81249
7.64481	8.71763	5.86997	7.22184	8.69468	8.4368
9.35476	8.96409	8.85841	6.34836	8.44277	9.15401
8.28867	7.90838	6.65654	8.78196	8.06408	7.52288
6.73856	8.6066	9.55111	7.07436	7.68733	7.68663
5.61491	9.00446	7.61402	8.11258	8.9008	7.31497
8.915	7.37635	8.8191	7.98105	6.16507	6.05574
6.31065	7.9906	7.6281	8.06015	8.25091	8.6362
7.33696	7.36072	7.43117	6.8866	7.66458	8.32494
8.85343	8.86085	6.18446	5.3415	8.52474	9.44059
9.00173	6.4385	8.98836	7.20797	6.7278	7.67805
8.07211	8.43584	8.97866	6.48991	7.39608	7.25529
8.1884	8.60136	8.14968	8.99146	7.07397	7.4702
8.41823	9.71313	8.27925	8.04076	8.54104	8.54274
8.007	8.62549	7.16782	7.772	7.20176	8.16103
7.84546	8.65119	7.18086	8.127	6.22351	7.51718
8.28287	8.87104	7.56216	6.2685	7.9211	9.1387
8.42062	7.38476	9.7972	6.68182	6.58026	7.08594
6.22641	7.90142	8.85596	8.16379	6.61345	9.11583
8.94026	5.92968	8.09402	7.88382	7.60108	7.41866
7.26388	6.6871	8.13432	6.6421	8.42378	8.3485
7.32012	6.82842	9.20411	7.24676	6.89709	8.8709
8.3924	6.70962	8.12506	7.55469	7.76863	8.3311
6.6314	7.49082	7.56065	6.11343	8.19149	7.81548
6.3474	8.0459	7.30317	8.27642	8.10314	7.08717
5.06395	8.60973	6.89551	6.61351	6.29544	7.9441
7.61357	8.39578	7.05276	7.77813	5.51994	6.30496
5.95689	8.36739	7.98105	8.78431	6.74533	7.39377
7.89705	7.5477	6.80987	6.57924	6.59975	8.29738
6.91324	8.11898	6.88011	6.80911	9.23696	6.90687
6.72642	8.11849	8.30358	7.95568	6.91606	7.52422
7.35375	5.7108	8.71062	8.35227	7.39864	7.42989
10.3246	6.68813	7.66115	6.54818	7.14448	7.8927
9.01288	7.29277	7.64306	7.55697	6.90471	6.09849
7.12333	8.38537	6.75361	9.35328	8.35128	6.43025
9.14197	8.20463	7.77045	7.92142	9.02851	7.22832
8.87301	8.84825	7.97433	7.01214	7.88966	8.06735
8.21402	7.85372	7.21882	8.06573	6.89904	6.31206
5.95985	7.87987	8.29808	6.90908	7.43442	8.77081
8.02865	8.49079	8.55147	6.52638	6.76368	8.94946
6.42447	7.39642	8.61445	9.05235	7.12658	8.66137
8.51311	9.51329	8.14012	7.68178	6.22813	8.46484
8.18016	7.22855	7.47054	8.65067	6.56254	8.58968
7.24641	9.99377	7.7982	7.68937	8.07661	6.52173
9.78929	7.34033	9.35409	7.24585	6.72085	7.98136
8.81212	6.83075	7.74127	7.76931	7.15525	7.88098
7.25969	6.78756	8.20188	7.69508	9.28802	8.46934
8.48107	7.60115	9.20885	8.27834	8.16474	6.93869
6.8692	6.20968	9.48735	9.50637	9.01408	7.54777
8.12754	8.35818	7.6829	8.44844	7.28857	6.70496
8.38907	7.9239	8.47951	7.60652	7.81459	8.33983
8.89686	6.87586	8.14728	8.08178	5.78569	9.03359
8.02103	7.07847	8.38307	8.68766	6.97538	8.55568
7.53172	6.06559	8.99012	5.2766	6.51026	6.35667
6.48123	5.2107	6.48754	7.43689	7.45026	6.93829
8.25202	7.8362	7.86601	7.54253	7.59184	8.52161
8.78204	8.52935	7.55565	6.05606	8.46177	8.82293
7.06071	7.7959	9.39868	6.79339	9.19783	7.43591
9.58346	9.34349	7.97786	8.11321	9.2987	6.23957
8.21262	8.82524	6.84497	6.33046	6.99572	7.95524
	7.34833	7.17138	6.10558	7.8174	7.44343
	7.70324	6.86236	6.71891	7.12728	6.85062
	7.87206	7.3438	7.32279	6.50505	7.90252
	7.08013	7.39276	7.54787	8.63368	8.72016
	6.70158	7.6203	7.68064	8.62985	8.18483
	7.08591	4.79314	8.24582	6.93441	7.14571
	6.3593	6.01591	8.10789	7.95161	7.79267
	8.5987	6.5298	8.32477	7.39676	8.52088
	9.47206	8.22316	8.36221	8.68387	7.1865
	8.65442	6.33103	9.02018	8.95452	6.72725
	7.96385	7.45661	6.16979	8.6281	7.23935
	7.89553	8.23319	8.6913	6.77333	8.82412
	7.05953	8.8268	7.14817	8.82886	7.00379
	7.64037	7.1088	6.33291	7.36935	8.13098
	8.63187	6.97044	6.50334	6.01915	6.75366
	6.75211	6.79133	6.65601	8.81667	8.96354
	8.77451	8.80563	7.69958	7.04135	7.68493
	5.99418	9.10918	8.91361	8.43623	7.4264
	7.59209	9.10582	7.37111	7.6945	8.15059
	8.975	8.54895	7.84999	7.65686	7.94828
	6.38462	7.79786	8.49918	7.36046	7.02711
	5.67414	8.42263	8.54539	6.30211	7.14755
	8.12084	8.18076	8.39897	7.35007
	9.13524	7.93157	8.69626	9.02773
	8.67514	9.34947	5.73881	8.16312
	8.52556	7.03861	6.28318	8.30445
	8.74168	7.9272	8.07649	7.55896
	8.57881	9.68877	7.48275	7.1584
	9.43314	10.2611	8.21042	7.39766
	7.30592		8.8021	5.94241
	8.25034		7.09119	6.01949
	7.55507		8.63922	7.18813
	8.498		8.04234	8.71892
			7.01544	7.22792
			8.98044	7.02923
				7.74518
				8.58738
				7.90093
				5.79159
				5.84903
				6.43865
				7.57423
				6.96239
				6.69212
				6.60746
				8.33154
				9.76824
				8.65433
				6.64628
				7.89752
				5.67838
				7.33084
				8.45851
				7.00158
				7.38056
				6.55133
				6.45516
				8.26364
				6.89281
				8.61927
				6.51114
				7.86564
				6.16507
				8.74836
				9.17317
				8.59117
				8.18815
				8.94535
