# Supplementary material for: UBP12 and UBP13 negatively regulate the activity of the ubiquitin-dependent peptidases DA1, DAR1 and DAR2
Source: eLife. 2020 Mar 25;9:e52276. doi: 10.7554/eLife.52276 (PMC7141810; doi:10.7554/eLife.52276)
Supplement: Figure 3—source data 1. [file elife-52276-fig3-data1.xlsx]

## Sheet: F3A Flow cytometry
Counts Flow cytometry data
	Col_2C			Col_4C			Col_8C			Col_16C			Col_32C			35S::UBP12_2C			35S::UBP12_4C			35S::UBP12_8C			35S::UBP12_16C			35S::UBP12_32C			Col_2C			Col_4C			Col_8C			Col_16C			Col_32C			35S::UBP13_2C			35S::UBP13_4C
DAS	R1	R2	R3	R1	R2	R3	R1	R2	R3	R1	R2	R3	R1	R2	R3	R1	R2	R3	R1	R2	R3	R1	R2	R3	R1	R2	R3	R1	R2	R3	R1	R2	R3	R1	R2	R3	R1	R2	R3	R1	R2	R3	R1	R2	R3	R1	R2	R3	R1
D9	0.739287	0.75043	0.741724	0.260713	0.24957	0.258276	0	0	0	0	0	0	0	0	0	0.720152	0.745777	0.757425	0.279848	0.254223	0.242575	0	0	0	0	0	0	0	0	0	0.657932	0.738105	0.738468	0.342068	0.261895	0.261532	0	0	0	0	0	0	0	0	0	0.735355	0.725298	0.76404	0.264645
D12	0.401634	0.446967	0.423309	0.534377	0.50845	0.530156	0.058271	0.041887	0.042045	0.004901	0.002488	0.004184	0.000817	0.000207	0.000306	0.501987	0.533941	0.559191	0.464868	0.433637	0.407489	0.031263	0.029281	0.030401	0.001464	0.002634	0.002617	0.000418	0.000507	0.000302	0.400367	0.454186	0.447947	0.539425	0.502885	0.48738	0.054095	0.037967	0.057476	0.00489	0.003847	0.004967	0.001222	0.001114	0.00223	0.62288	0.593408	0.622934	0.349162
D15	0.236247	0.264207	0.248562	0.385833	0.404947	0.324708	0.354467	0.309076	0.386873	0.022309	0.020339	0.037379	0.001144	0.001431	0.002479	0.276888	0.268251	0.280684	0.447567	0.345923	0.487646	0.26263	0.363895	0.219366	0.011881	0.021525	0.011203	0.001033	0.000406	0.0011	0.228378	0.273483	0.266222	0.371762	0.327895	0.395189	0.373555	0.365387	0.308672	0.024811	0.031411	0.0283	0.001495	0.001824	0.001617	0.290817	0.322703	0.412232	0.398074
D18	0.157002	0.245911	0.226402	0.285868	0.346888	0.304107	0.510524	0.375511	0.423085	0.04317	0.029646	0.043049	0.003436	0.002045	0.003357	0.248029	0.252746	0.241106	0.31218	0.282374	0.284097	0.406287	0.408344	0.411464	0.030449	0.054117	0.061128	0.003055	0.002419	0.002205	0.215805	0.251767	0.259211	0.311928	0.272969	0.340769	0.431213	0.426303	0.360957	0.039066	0.047629	0.037246	0.001988	0.001332	0.001817	0.287211	0.300299	0.285493	0.30194
D21	0.169649	0.238405	0.249402	0.184167	0.295092	0.275598	0.395453	0.409693	0.412251	0.240047	0.053497	0.059761	0.010683	0.003313	0.002988	0.23416	0.247179	0.264374	0.279044	0.273781	0.318501	0.415403	0.408102	0.383704	0.068782	0.068823	0.031975	0.002611	0.002116	0.001445	0.212064	0.24638	0.212133	0.29845	0.266266	0.260848	0.44417	0.407812	0.459723	0.042946	0.076178	0.062877	0.002369	0.003365	0.004419	0.285583	0.256576	0.328199	0.262883
D24	0.162539	0.238723	0.230516	0.234004	0.286163	0.275962	0.545436	0.426052	0.439904	0.053371	0.046427	0.049033	0.00465	0.002636	0.004584	0.256701	0.239899	0.234502	0.386973	0.326751	0.287978	0.32123	0.409068	0.440483	0.034389	0.023275	0.035948	0.000708	0.001008	0.001089	0.188665	0.263415	0.222025	0.30269	0.309146	0.287861	0.463208	0.387602	0.452155	0.042651	0.03689	0.03618	0.002786	0.002947	0.001779	0.277143	0.218747	0.236911	0.274756
D27	0.136955	0.232641	0.226764	0.207298	0.312166	0.237461	0.566021	0.420772	0.438288	0.084812	0.033234	0.094863	0.004914	0.001187	0.002624	0.227133	0.230383	0.23327	0.296055	0.256171	0.283285	0.417384	0.405479	0.407769	0.056066	0.105358	0.072155	0.003362	0.002609	0.003522	0.172081	0.216729	0.22159	0.276804	0.262308	0.287144	0.4722	0.451325	0.436703	0.075827	0.065679	0.051619	0.003089	0.003959	0.002944	0.275	0.229664	0.266848	0.248566
Statisctical analysis 35S::UBP12_3.1
Table Analyzed	Col-0 vs 35S::UBP12_3.1
Two-way ANOVA	Ordinary
Alpha	0.05
Source of Variation	% of total variation	P value	P value summary	Significant?
Interaction	38.73	<0,0001	****	Yes
Row Factor	3.744e-12	>0,9999	ns	No
Column Factor	59.56	<0,0001	****	Yes
ANOVA table	SS (Type III)	DF	MS	F (DFn, DFd)	P value
Interaction	4.532	54	0.08392	F (54, 245) = 102,2	P<0,0001
Row Factor	4.381e-13	6	7.302e-14	F (6, 245) = 8,894e-011	P>0,9999
Column Factor	6.969	9	0.7743	F (9, 245) = 943,2	P<0,0001
Residual	0.2011	245	0.000821
Within each row, compare columns (simple effects within rows)
Number of families	7
Number of comparisons per family	45
Alpha	0.05
Tukey's multiple comparisons test	Predicted (LS) mean diff,	95,00% CI of diff,	Significant?	Summary	Adjusted P Value
D9
Col_2C vs. Col_4C	0.4553	0,4025 to 0,5081	Yes	****	<0,0001
Col_2C vs. Col_8C	0.7277	0,6748 to 0,7805	Yes	****	<0,0001
Col_2C vs. Col_16C	0.7277	0,6748 to 0,7805	Yes	****	<0,0001
Col_2C vs. Col_32C	0.7277	0,6748 to 0,7805	Yes	****	<0,0001
Col_2C vs. 35S::UBP12_2C	-0.01346	-0,07815 to 0,05123	No	ns	0.9997
Col_2C vs. 35S::UBP12_4C	0.4688	0,4041 to 0,5335	Yes	****	<0,0001
Col_2C vs. 35S::UBP12_8C	0.7277	0,6630 to 0,7924	Yes	****	<0,0001
Col_2C vs. 35S::UBP12_16C	0.7277	0,6630 to 0,7924	Yes	****	<0,0001
Col_2C vs. 35S::UBP12_32C	0.7277	0,6630 to 0,7924	Yes	****	<0,0001
Col_4C vs. Col_8C	0.2723	0,2195 to 0,3252	Yes	****	<0,0001
Col_4C vs. Col_16C	0.2723	0,2195 to 0,3252	Yes	****	<0,0001
Col_4C vs. Col_32C	0.2723	0,2195 to 0,3252	Yes	****	<0,0001
Col_4C vs. 35S::UBP12_2C	-0.4688	-0,5335 to -0,4041	Yes	****	<0,0001
Col_4C vs. 35S::UBP12_4C	0.01346	-0,05123 to 0,07815	No	ns	0.9997
Col_4C vs. 35S::UBP12_8C	0.2723	0,2076 to 0,3370	Yes	****	<0,0001
Col_4C vs. 35S::UBP12_16C	0.2723	0,2076 to 0,3370	Yes	****	<0,0001
Col_4C vs. 35S::UBP12_32C	0.2723	0,2076 to 0,3370	Yes	****	<0,0001
Col_8C vs. Col_16C	-1.11e-16	-0,05282 to 0,05282	No	ns	>0,9999
Col_8C vs. Col_32C	-8.327e-17	-0,05282 to 0,05282	No	ns	>0,9999
Col_8C vs. 35S::UBP12_2C	-0.7411	-0,8058 to -0,6764	Yes	****	<0,0001
Col_8C vs. 35S::UBP12_4C	-0.2589	-0,3236 to -0,1942	Yes	****	<0,0001
Col_8C vs. 35S::UBP12_8C	-2.776e-16	-0,06469 to 0,06469	No	ns	>0,9999
Col_8C vs. 35S::UBP12_16C	-1.943e-16	-0,06469 to 0,06469	No	ns	>0,9999
Col_8C vs. 35S::UBP12_32C	0	-0,06469 to 0,06469	No	ns	>0,9999
Col_16C vs. Col_32C	2.776e-17	-0,05282 to 0,05282	No	ns	>0,9999
Col_16C vs. 35S::UBP12_2C	-0.7411	-0,8058 to -0,6764	Yes	****	<0,0001
Col_16C vs. 35S::UBP12_4C	-0.2589	-0,3236 to -0,1942	Yes	****	<0,0001
Col_16C vs. 35S::UBP12_8C	-1.665e-16	-0,06469 to 0,06469	No	ns	>0,9999
Col_16C vs. 35S::UBP12_16C	-8.327e-17	-0,06469 to 0,06469	No	ns	>0,9999
Col_16C vs. 35S::UBP12_32C	1.11e-16	-0,06469 to 0,06469	No	ns	>0,9999
Col_32C vs. 35S::UBP12_2C	-0.7411	-0,8058 to -0,6764	Yes	****	<0,0001
Col_32C vs. 35S::UBP12_4C	-0.2589	-0,3236 to -0,1942	Yes	****	<0,0001
Col_32C vs. 35S::UBP12_8C	-1.943e-16	-0,06469 to 0,06469	No	ns	>0,9999
Col_32C vs. 35S::UBP12_16C	-1.11e-16	-0,06469 to 0,06469	No	ns	>0,9999
Col_32C vs. 35S::UBP12_32C	8.327e-17	-0,06469 to 0,06469	No	ns	>0,9999
35S::UBP12_2C vs. 35S::UBP12_4C	0.4822	0,4075 to 0,5569	Yes	****	<0,0001
35S::UBP12_2C vs. 35S::UBP12_8C	0.7411	0,6664 to 0,8158	Yes	****	<0,0001
35S::UBP12_2C vs. 35S::UBP12_16C	0.7411	0,6664 to 0,8158	Yes	****	<0,0001
35S::UBP12_2C vs. 35S::UBP12_32C	0.7411	0,6664 to 0,8158	Yes	****	<0,0001
35S::UBP12_4C vs. 35S::UBP12_8C	0.2589	0,1842 to 0,3336	Yes	****	<0,0001
35S::UBP12_4C vs. 35S::UBP12_16C	0.2589	0,1842 to 0,3336	Yes	****	<0,0001
35S::UBP12_4C vs. 35S::UBP12_32C	0.2589	0,1842 to 0,3336	Yes	****	<0,0001
35S::UBP12_8C vs. 35S::UBP12_16C	8.327e-17	-0,07470 to 0,07470	No	ns	>0,9999
35S::UBP12_8C vs. 35S::UBP12_32C	2.776e-16	-0,07470 to 0,07470	No	ns	>0,9999
35S::UBP12_16C vs. 35S::UBP12_32C	1.943e-16	-0,07470 to 0,07470	No	ns	>0,9999
D12
Col_2C vs. Col_4C	-0.08804	-0,1409 to -0,03522	Yes	****	<0,0001
Col_2C vs. Col_8C	0.3804	0,3276 to 0,4333	Yes	****	<0,0001
Col_2C vs. Col_16C	0.4249	0,3720 to 0,4777	Yes	****	<0,0001
Col_2C vs. Col_32C	0.4281	0,3753 to 0,4809	Yes	****	<0,0001
Col_2C vs. 35S::UBP12_2C	-0.1026	-0,1673 to -0,03794	Yes	****	<0,0001
Col_2C vs. 35S::UBP12_4C	-0.006263	-0,07096 to 0,05843	No	ns	>0,9999
Col_2C vs. 35S::UBP12_8C	0.3988	0,3341 to 0,4634	Yes	****	<0,0001
Col_2C vs. 35S::UBP12_16C	0.4268	0,3621 to 0,4915	Yes	****	<0,0001
Col_2C vs. 35S::UBP12_32C	0.4287	0,3640 to 0,4934	Yes	****	<0,0001
Col_4C vs. Col_8C	0.4685	0,4157 to 0,5213	Yes	****	<0,0001
Col_4C vs. Col_16C	0.5129	0,4601 to 0,5657	Yes	****	<0,0001
Col_4C vs. Col_32C	0.5161	0,4633 to 0,5690	Yes	****	<0,0001
Col_4C vs. 35S::UBP12_2C	-0.01459	-0,07929 to 0,05010	No	ns	0.9994
Col_4C vs. 35S::UBP12_4C	0.08178	0,01709 to 0,1465	Yes	**	0.0029
Col_4C vs. 35S::UBP12_8C	0.4868	0,4221 to 0,5515	Yes	****	<0,0001
Col_4C vs. 35S::UBP12_16C	0.5149	0,4502 to 0,5796	Yes	****	<0,0001
Col_4C vs. 35S::UBP12_32C	0.5167	0,4520 to 0,5814	Yes	****	<0,0001
Col_8C vs. Col_16C	0.04441	-0,008412 to 0,09723	No	ns	0.1858
Col_8C vs. Col_32C	0.04764	-0,005182 to 0,1005	No	ns	0.1169
Col_8C vs. 35S::UBP12_2C	-0.4831	-0,5478 to -0,4184	Yes	****	<0,0001
Col_8C vs. 35S::UBP12_4C	-0.3867	-0,4514 to -0,3220	Yes	****	<0,0001
Col_8C vs. 35S::UBP12_8C	0.01831	-0,04639 to 0,08300	No	ns	0.9963
Col_8C vs. 35S::UBP12_16C	0.04639	-0,01831 to 0,1111	No	ns	0.3997
Col_8C vs. 35S::UBP12_32C	0.04821	-0,01648 to 0,1129	No	ns	0.3426
Col_16C vs. Col_32C	0.00323	-0,04959 to 0,05605	No	ns	>0,9999
Col_16C vs. 35S::UBP12_2C	-0.5275	-0,5922 to -0,4628	Yes	****	<0,0001
Col_16C vs. 35S::UBP12_4C	-0.4311	-0,4958 to -0,3664	Yes	****	<0,0001
Col_16C vs. 35S::UBP12_8C	-0.0261	-0,09080 to 0,03859	No	ns	0.9555
Col_16C vs. 35S::UBP12_16C	0.001974	-0,06272 to 0,06667	No	ns	>0,9999
Col_16C vs. 35S::UBP12_32C	0.003804	-0,06089 to 0,06850	No	ns	>0,9999
Col_32C vs. 35S::UBP12_2C	-0.5307	-0,5954 to -0,4660	Yes	****	<0,0001
Col_32C vs. 35S::UBP12_4C	-0.4343	-0,4990 to -0,3697	Yes	****	<0,0001
Col_32C vs. 35S::UBP12_8C	-0.02933	-0,09403 to 0,03536	No	ns	0.9107
Col_32C vs. 35S::UBP12_16C	-0.001256	-0,06595 to 0,06344	No	ns	>0,9999
Col_32C vs. 35S::UBP12_32C	0.0005737	-0,06412 to 0,06527	No	ns	>0,9999
35S::UBP12_2C vs. 35S::UBP12_4C	0.09637	0,02167 to 0,1711	Yes	**	0.0021
35S::UBP12_2C vs. 35S::UBP12_8C	0.5014	0,4267 to 0,5761	Yes	****	<0,0001
35S::UBP12_2C vs. 35S::UBP12_16C	0.5295	0,4548 to 0,6042	Yes	****	<0,0001
35S::UBP12_2C vs. 35S::UBP12_32C	0.5313	0,4566 to 0,6060	Yes	****	<0,0001
35S::UBP12_4C vs. 35S::UBP12_8C	0.405	0,3303 to 0,4797	Yes	****	<0,0001
35S::UBP12_4C vs. 35S::UBP12_16C	0.4331	0,3584 to 0,5078	Yes	****	<0,0001
35S::UBP12_4C vs. 35S::UBP12_32C	0.4349	0,3602 to 0,5096	Yes	****	<0,0001
35S::UBP12_8C vs. 35S::UBP12_16C	0.02808	-0,04663 to 0,1028	No	ns	0.9718
35S::UBP12_8C vs. 35S::UBP12_32C	0.02991	-0,04480 to 0,1046	No	ns	0.9576
35S::UBP12_16C vs. 35S::UBP12_32C	0.001829	-0,07287 to 0,07653	No	ns	>0,9999
D15
Col_2C vs. Col_4C	-0.1155	-0,1684 to -0,06272	Yes	****	<0,0001
Col_2C vs. Col_8C	-0.09682	-0,1496 to -0,04400	Yes	****	<0,0001
Col_2C vs. Col_16C	0.2254	0,1726 to 0,2782	Yes	****	<0,0001
Col_2C vs. Col_32C	0.2512	0,1984 to 0,3040	Yes	****	<0,0001
Col_2C vs. 35S::UBP12_2C	-0.02242	-0,08712 to 0,04227	No	ns	0.9837
Col_2C vs. 35S::UBP12_4C	-0.1742	-0,2389 to -0,1095	Yes	****	<0,0001
Col_2C vs. 35S::UBP12_8C	-0.02911	-0,09381 to 0,03558	No	ns	0.9144
Col_2C vs. 35S::UBP12_16C	0.238	0,1733 to 0,3027	Yes	****	<0,0001
Col_2C vs. 35S::UBP12_32C	0.252	0,1873 to 0,3167	Yes	****	<0,0001
Col_4C vs. Col_8C	0.01872	-0,03411 to 0,07154	No	ns	0.981
Col_4C vs. Col_16C	0.341	0,2881 to 0,3938	Yes	****	<0,0001
Col_4C vs. Col_32C	0.3667	0,3139 to 0,4195	Yes	****	<0,0001
Col_4C vs. 35S::UBP12_2C	0.09311	0,02842 to 0,1578	Yes	***	0.0003
Col_4C vs. 35S::UBP12_4C	-0.05866	-0,1234 to 0,006038	No	ns	0.1125
Col_4C vs. 35S::UBP12_8C	0.08643	0,02173 to 0,1511	Yes	**	0.0012
Col_4C vs. 35S::UBP12_16C	0.3535	0,2888 to 0,4182	Yes	****	<0,0001
Col_4C vs. 35S::UBP12_32C	0.3675	0,3028 to 0,4322	Yes	****	<0,0001
Col_8C vs. Col_16C	0.3222	0,2694 to 0,3751	Yes	****	<0,0001
Col_8C vs. Col_32C	0.348	0,2952 to 0,4008	Yes	****	<0,0001
Col_8C vs. 35S::UBP12_2C	0.0744	0,009703 to 0,1391	Yes	*	0.0108
Col_8C vs. 35S::UBP12_4C	-0.07737	-0,1421 to -0,01268	Yes	**	0.0064
Col_8C vs. 35S::UBP12_8C	0.06771	0,003014 to 0,1324	Yes	*	0.032
Col_8C vs. 35S::UBP12_16C	0.3348	0,2701 to 0,3995	Yes	****	<0,0001
Col_8C vs. 35S::UBP12_32C	0.3488	0,2841 to 0,4135	Yes	****	<0,0001
Col_16C vs. Col_32C	0.02576	-0,02706 to 0,07858	No	ns	0.8671
Col_16C vs. 35S::UBP12_2C	-0.2478	-0,3125 to -0,1832	Yes	****	<0,0001
Col_16C vs. 35S::UBP12_4C	-0.3996	-0,4643 to -0,3349	Yes	****	<0,0001
Col_16C vs. 35S::UBP12_8C	-0.2545	-0,3192 to -0,1898	Yes	****	<0,0001
Col_16C vs. 35S::UBP12_16C	0.01256	-0,05214 to 0,07725	No	ns	0.9998
Col_16C vs. 35S::UBP12_32C	0.02658	-0,03812 to 0,09127	No	ns	0.9502
Col_32C vs. 35S::UBP12_2C	-0.2736	-0,3383 to -0,2089	Yes	****	<0,0001
Col_32C vs. 35S::UBP12_4C	-0.4254	-0,4901 to -0,3607	Yes	****	<0,0001
Col_32C vs. 35S::UBP12_8C	-0.2803	-0,3450 to -0,2156	Yes	****	<0,0001
Col_32C vs. 35S::UBP12_16C	-0.0132	-0,07790 to 0,05149	No	ns	0.9997
Col_32C vs. 35S::UBP12_32C	0.0008187	-0,06388 to 0,06551	No	ns	>0,9999
35S::UBP12_2C vs. 35S::UBP12_4C	-0.1518	-0,2265 to -0,07707	Yes	****	<0,0001
35S::UBP12_2C vs. 35S::UBP12_8C	-0.006689	-0,08139 to 0,06801	No	ns	>0,9999
35S::UBP12_2C vs. 35S::UBP12_16C	0.2604	0,1857 to 0,3351	Yes	****	<0,0001
35S::UBP12_2C vs. 35S::UBP12_32C	0.2744	0,1997 to 0,3491	Yes	****	<0,0001
35S::UBP12_4C vs. 35S::UBP12_8C	0.1451	0,07038 to 0,2198	Yes	****	<0,0001
35S::UBP12_4C vs. 35S::UBP12_16C	0.4122	0,3375 to 0,4869	Yes	****	<0,0001
35S::UBP12_4C vs. 35S::UBP12_32C	0.4262	0,3515 to 0,5009	Yes	****	<0,0001
35S::UBP12_8C vs. 35S::UBP12_16C	0.2671	0,1924 to 0,3418	Yes	****	<0,0001
35S::UBP12_8C vs. 35S::UBP12_32C	0.2811	0,2064 to 0,3558	Yes	****	<0,0001
35S::UBP12_16C vs. 35S::UBP12_32C	0.01402	-0,06068 to 0,08873	No	ns	0.9999
D18
Col_2C vs. Col_4C	-0.08441	-0,1372 to -0,03158	Yes	****	<0,0001
Col_2C vs. Col_8C	-0.1952	-0,2481 to -0,1424	Yes	****	<0,0001
Col_2C vs. Col_16C	0.186	0,1332 to 0,2389	Yes	****	<0,0001
Col_2C vs. Col_32C	0.2237	0,1709 to 0,2765	Yes	****	<0,0001
Col_2C vs. 35S::UBP12_2C	-0.02128	-0,08597 to 0,04342	No	ns	0.9887
Col_2C vs. 35S::UBP12_4C	-0.06687	-0,1316 to -0,002173	Yes	*	0.0363
Col_2C vs. 35S::UBP12_8C	-0.1827	-0,2474 to -0,1180	Yes	****	<0,0001
Col_2C vs. 35S::UBP12_16C	0.1775	0,1128 to 0,2421	Yes	****	<0,0001
Col_2C vs. 35S::UBP12_32C	0.2235	0,1588 to 0,2882	Yes	****	<0,0001
Col_4C vs. Col_8C	-0.1108	-0,1637 to -0,05802	Yes	****	<0,0001
Col_4C vs. Col_16C	0.2705	0,2176 to 0,3233	Yes	****	<0,0001
Col_4C vs. Col_32C	0.3081	0,2553 to 0,3609	Yes	****	<0,0001
Col_4C vs. 35S::UBP12_2C	0.06313	-0,001566 to 0,1278	No	ns	0.0624
Col_4C vs. 35S::UBP12_4C	0.01754	-0,04716 to 0,08223	No	ns	0.9973
Col_4C vs. 35S::UBP12_8C	-0.09828	-0,1630 to -0,03358	Yes	****	<0,0001
Col_4C vs. 35S::UBP12_16C	0.2619	0,1972 to 0,3266	Yes	****	<0,0001
Col_4C vs. 35S::UBP12_32C	0.3079	0,2432 to 0,3726	Yes	****	<0,0001
Col_8C vs. Col_16C	0.3813	0,3285 to 0,4341	Yes	****	<0,0001
Col_8C vs. Col_32C	0.4189	0,3661 to 0,4718	Yes	****	<0,0001
Col_8C vs. 35S::UBP12_2C	0.174	0,1093 to 0,2387	Yes	****	<0,0001
Col_8C vs. 35S::UBP12_4C	0.1284	0,06369 to 0,1931	Yes	****	<0,0001
Col_8C vs. 35S::UBP12_8C	0.01257	-0,05213 to 0,07726	No	ns	0.9998
Col_8C vs. 35S::UBP12_16C	0.3727	0,3080 to 0,4374	Yes	****	<0,0001
Col_8C vs. 35S::UBP12_32C	0.4187	0,3540 to 0,4834	Yes	****	<0,0001
Col_16C vs. Col_32C	0.03764	-0,01518 to 0,09046	No	ns	0.409
Col_16C vs. 35S::UBP12_2C	-0.2073	-0,2720 to -0,1426	Yes	****	<0,0001
Col_16C vs. 35S::UBP12_4C	-0.2529	-0,3176 to -0,1882	Yes	****	<0,0001
Col_16C vs. 35S::UBP12_8C	-0.3687	-0,4334 to -0,3040	Yes	****	<0,0001
Col_16C vs. 35S::UBP12_16C	-0.008597	-0,07329 to 0,05610	No	ns	>0,9999
Col_16C vs. 35S::UBP12_32C	0.03741	-0,02729 to 0,1021	No	ns	0.7049
Col_32C vs. 35S::UBP12_2C	-0.245	-0,3097 to -0,1803	Yes	****	<0,0001
Col_32C vs. 35S::UBP12_4C	-0.2906	-0,3552 to -0,2259	Yes	****	<0,0001
Col_32C vs. 35S::UBP12_8C	-0.4064	-0,4711 to -0,3417	Yes	****	<0,0001
Col_32C vs. 35S::UBP12_16C	-0.04624	-0,1109 to 0,01846	No	ns	0.4045
Col_32C vs. 35S::UBP12_32C	-0.0002305	-0,06492 to 0,06446	No	ns	>0,9999
35S::UBP12_2C vs. 35S::UBP12_4C	-0.04559	-0,1203 to 0,02911	No	ns	0.6357
35S::UBP12_2C vs. 35S::UBP12_8C	-0.1614	-0,2361 to -0,08670	Yes	****	<0,0001
35S::UBP12_2C vs. 35S::UBP12_16C	0.1987	0,1240 to 0,2734	Yes	****	<0,0001
35S::UBP12_2C vs. 35S::UBP12_32C	0.2447	0,1700 to 0,3194	Yes	****	<0,0001
35S::UBP12_4C vs. 35S::UBP12_8C	-0.1158	-0,1905 to -0,04111	Yes	****	<0,0001
35S::UBP12_4C vs. 35S::UBP12_16C	0.2443	0,1696 to 0,3190	Yes	****	<0,0001
35S::UBP12_4C vs. 35S::UBP12_32C	0.2903	0,2156 to 0,3650	Yes	****	<0,0001
35S::UBP12_8C vs. 35S::UBP12_16C	0.3601	0,2854 to 0,4348	Yes	****	<0,0001
35S::UBP12_8C vs. 35S::UBP12_32C	0.4061	0,3314 to 0,4808	Yes	****	<0,0001
35S::UBP12_16C vs. 35S::UBP12_32C	0.04601	-0,02870 to 0,1207	No	ns	0.6233
D21
Col_2C vs. Col_4C	-0.04206	-0,09489 to 0,01076	No	ns	0.2513
Col_2C vs. Col_8C	-0.2002	-0,2530 to -0,1474	Yes	****	<0,0001
Col_2C vs. Col_16C	0.1321	0,07930 to 0,1849	Yes	****	<0,0001
Col_2C vs. Col_32C	0.2168	0,1640 to 0,2696	Yes	****	<0,0001
Col_2C vs. 35S::UBP12_2C	-0.02723	-0,09193 to 0,03746	No	ns	0.9422
Col_2C vs. 35S::UBP12_4C	-0.0691	-0,1338 to -0,004409	Yes	*	0.0258
Col_2C vs. 35S::UBP12_8C	-0.1811	-0,2458 to -0,1164	Yes	****	<0,0001
Col_2C vs. 35S::UBP12_16C	0.1648	0,1001 to 0,2295	Yes	****	<0,0001
Col_2C vs. 35S::UBP12_32C	0.2193	0,1546 to 0,2840	Yes	****	<0,0001
Col_4C vs. Col_8C	-0.1581	-0,2109 to -0,1053	Yes	****	<0,0001
Col_4C vs. Col_16C	0.1742	0,1214 to 0,2270	Yes	****	<0,0001
Col_4C vs. Col_32C	0.2589	0,2061 to 0,3117	Yes	****	<0,0001
Col_4C vs. 35S::UBP12_2C	0.01483	-0,04986 to 0,07953	No	ns	0.9993
Col_4C vs. 35S::UBP12_4C	-0.02704	-0,09173 to 0,03766	No	ns	0.9447
Col_4C vs. 35S::UBP12_8C	-0.139	-0,2037 to -0,07431	Yes	****	<0,0001
Col_4C vs. 35S::UBP12_16C	0.2069	0,1422 to 0,2716	Yes	****	<0,0001
Col_4C vs. 35S::UBP12_32C	0.2613	0,1967 to 0,3260	Yes	****	<0,0001
Col_8C vs. Col_16C	0.3323	0,2795 to 0,3851	Yes	****	<0,0001
Col_8C vs. Col_32C	0.417	0,3642 to 0,4698	Yes	****	<0,0001
Col_8C vs. 35S::UBP12_2C	0.1729	0,1083 to 0,2376	Yes	****	<0,0001
Col_8C vs. 35S::UBP12_4C	0.1311	0,06638 to 0,1958	Yes	****	<0,0001
Col_8C vs. 35S::UBP12_8C	0.01911	-0,04558 to 0,08381	No	ns	0.9948
Col_8C vs. 35S::UBP12_16C	0.365	0,3003 to 0,4297	Yes	****	<0,0001
Col_8C vs. 35S::UBP12_32C	0.4195	0,3548 to 0,4842	Yes	****	<0,0001
Col_16C vs. Col_32C	0.08469	0,03187 to 0,1375	Yes	****	<0,0001
Col_16C vs. 35S::UBP12_2C	-0.1594	-0,2240 to -0,09466	Yes	****	<0,0001
Col_16C vs. 35S::UBP12_4C	-0.2012	-0,2659 to -0,1365	Yes	****	<0,0001
Col_16C vs. 35S::UBP12_8C	-0.3132	-0,3779 to -0,2485	Yes	****	<0,0001
Col_16C vs. 35S::UBP12_16C	0.03269	-0,03200 to 0,09739	No	ns	0.8405
Col_16C vs. 35S::UBP12_32C	0.08716	0,02247 to 0,1519	Yes	**	0.001
Col_32C vs. 35S::UBP12_2C	-0.244	-0,3087 to -0,1794	Yes	****	<0,0001
Col_32C vs. 35S::UBP12_4C	-0.2859	-0,3506 to -0,2212	Yes	****	<0,0001
Col_32C vs. 35S::UBP12_8C	-0.3979	-0,4626 to -0,3332	Yes	****	<0,0001
Col_32C vs. 35S::UBP12_16C	-0.052	-0,1167 to 0,01269	No	ns	0.2393
Col_32C vs. 35S::UBP12_32C	0.002466	-0,06223 to 0,06716	No	ns	>0,9999
35S::UBP12_2C vs. 35S::UBP12_4C	-0.04187	-0,1166 to 0,03283	No	ns	0.7411
35S::UBP12_2C vs. 35S::UBP12_8C	-0.1538	-0,2285 to -0,07913	Yes	****	<0,0001
35S::UBP12_2C vs. 35S::UBP12_16C	0.192	0,1173 to 0,2667	Yes	****	<0,0001
35S::UBP12_2C vs. 35S::UBP12_32C	0.2465	0,1718 to 0,3212	Yes	****	<0,0001
35S::UBP12_4C vs. 35S::UBP12_8C	-0.112	-0,1867 to -0,03726	Yes	***	0.0001
35S::UBP12_4C vs. 35S::UBP12_16C	0.2339	0,1592 to 0,3086	Yes	****	<0,0001
35S::UBP12_4C vs. 35S::UBP12_32C	0.2884	0,2137 to 0,3631	Yes	****	<0,0001
35S::UBP12_8C vs. 35S::UBP12_16C	0.3459	0,2712 to 0,4206	Yes	****	<0,0001
35S::UBP12_8C vs. 35S::UBP12_32C	0.4003	0,3256 to 0,4750	Yes	****	<0,0001
35S::UBP12_16C vs. 35S::UBP12_32C	0.05447	-0,02023 to 0,1292	No	ns	0.3746
D24
Col_2C vs. Col_4C	-0.06499	-0,1178 to -0,01217	Yes	**	0.0043
Col_2C vs. Col_8C	-0.2347	-0,2876 to -0,1819	Yes	****	<0,0001
Col_2C vs. Col_16C	0.1736	0,1207 to 0,2264	Yes	****	<0,0001
Col_2C vs. Col_32C	0.2144	0,1616 to 0,2672	Yes	****	<0,0001
Col_2C vs. 35S::UBP12_2C	-0.02605	-0,09075 to 0,03864	No	ns	0.956
Col_2C vs. 35S::UBP12_4C	-0.1163	-0,1809 to -0,05156	Yes	****	<0,0001
Col_2C vs. 35S::UBP12_8C	-0.1726	-0,2373 to -0,1079	Yes	****	<0,0001
Col_2C vs. 35S::UBP12_16C	0.1864	0,1217 to 0,2511	Yes	****	<0,0001
Col_2C vs. 35S::UBP12_32C	0.2167	0,1520 to 0,2814	Yes	****	<0,0001
Col_4C vs. Col_8C	-0.1698	-0,2226 to -0,1169	Yes	****	<0,0001
Col_4C vs. Col_16C	0.2385	0,1857 to 0,2914	Yes	****	<0,0001
Col_4C vs. Col_32C	0.2794	0,2266 to 0,3322	Yes	****	<0,0001
Col_4C vs. 35S::UBP12_2C	0.03894	-0,02576 to 0,1036	No	ns	0.6542
Col_4C vs. 35S::UBP12_4C	-0.05126	-0,1160 to 0,01343	No	ns	0.2578
Col_4C vs. 35S::UBP12_8C	-0.1076	-0,1723 to -0,04293	Yes	****	<0,0001
Col_4C vs. 35S::UBP12_16C	0.2514	0,1867 to 0,3161	Yes	****	<0,0001
Col_4C vs. 35S::UBP12_32C	0.2817	0,2170 to 0,3464	Yes	****	<0,0001
Col_8C vs. Col_16C	0.4083	0,3555 to 0,4611	Yes	****	<0,0001
Col_8C vs. Col_32C	0.4492	0,3963 to 0,5020	Yes	****	<0,0001
Col_8C vs. 35S::UBP12_2C	0.2087	0,1440 to 0,2734	Yes	****	<0,0001
Col_8C vs. 35S::UBP12_4C	0.1185	0,05380 to 0,1832	Yes	****	<0,0001
Col_8C vs. 35S::UBP12_8C	0.06213	-0,002562 to 0,1268	No	ns	0.0715
Col_8C vs. 35S::UBP12_16C	0.4212	0,3565 to 0,4859	Yes	****	<0,0001
Col_8C vs. 35S::UBP12_32C	0.4515	0,3868 to 0,5162	Yes	****	<0,0001
Col_16C vs. Col_32C	0.04086	-0,01196 to 0,09368	No	ns	0.29
Col_16C vs. 35S::UBP12_2C	-0.1996	-0,2643 to -0,1349	Yes	****	<0,0001
Col_16C vs. 35S::UBP12_4C	-0.2898	-0,3545 to -0,2251	Yes	****	<0,0001
Col_16C vs. 35S::UBP12_8C	-0.3462	-0,4109 to -0,2815	Yes	****	<0,0001
Col_16C vs. 35S::UBP12_16C	0.01289	-0,05181 to 0,07758	No	ns	0.9998
Col_16C vs. 35S::UBP12_32C	0.04316	-0,02154 to 0,1079	No	ns	0.5081
Col_32C vs. 35S::UBP12_2C	-0.2405	-0,3052 to -0,1758	Yes	****	<0,0001
Col_32C vs. 35S::UBP12_4C	-0.3307	-0,3954 to -0,2660	Yes	****	<0,0001
Col_32C vs. 35S::UBP12_8C	-0.387	-0,4517 to -0,3223	Yes	****	<0,0001
Col_32C vs. 35S::UBP12_16C	-0.02797	-0,09267 to 0,03672	No	ns	0.9321
Col_32C vs. 35S::UBP12_32C	0.002295	-0,06240 to 0,06699	No	ns	>0,9999
35S::UBP12_2C vs. 35S::UBP12_4C	-0.0902	-0,1649 to -0,01550	Yes	**	0.0056
35S::UBP12_2C vs. 35S::UBP12_8C	-0.1466	-0,2213 to -0,07186	Yes	****	<0,0001
35S::UBP12_2C vs. 35S::UBP12_16C	0.2125	0,1378 to 0,2872	Yes	****	<0,0001
35S::UBP12_2C vs. 35S::UBP12_32C	0.2428	0,1681 to 0,3175	Yes	****	<0,0001
35S::UBP12_4C vs. 35S::UBP12_8C	-0.05636	-0,1311 to 0,01834	No	ns	0.325
35S::UBP12_4C vs. 35S::UBP12_16C	0.3027	0,2280 to 0,3774	Yes	****	<0,0001
35S::UBP12_4C vs. 35S::UBP12_32C	0.333	0,2583 to 0,4077	Yes	****	<0,0001
35S::UBP12_8C vs. 35S::UBP12_16C	0.3591	0,2844 to 0,4338	Yes	****	<0,0001
35S::UBP12_8C vs. 35S::UBP12_32C	0.3893	0,3146 to 0,4640	Yes	****	<0,0001
35S::UBP12_16C vs. 35S::UBP12_32C	0.03027	-0,04443 to 0,1050	No	ns	0.9543
D27
Col_2C vs. Col_4C	-0.06274	-0,1156 to -0,009914	Yes	**	0.0071
Col_2C vs. Col_8C	-0.2631	-0,3159 to -0,2103	Yes	****	<0,0001
Col_2C vs. Col_16C	0.1335	0,08063 to 0,1863	Yes	****	<0,0001
Col_2C vs. Col_32C	0.198	0,1452 to 0,2508	Yes	****	<0,0001
Col_2C vs. 35S::UBP12_2C	-0.02914	-0,09383 to 0,03556	No	ns	0.914
Col_2C vs. 35S::UBP12_4C	-0.07738	-0,1421 to -0,01268	Yes	**	0.0064
Col_2C vs. 35S::UBP12_8C	-0.2091	-0,2738 to -0,1444	Yes	****	<0,0001
Col_2C vs. 35S::UBP12_16C	0.1233	0,05857 to 0,1880	Yes	****	<0,0001
Col_2C vs. 35S::UBP12_32C	0.198	0,1333 to 0,2627	Yes	****	<0,0001
Col_4C vs. Col_8C	-0.2004	-0,2532 to -0,1475	Yes	****	<0,0001
Col_4C vs. Col_16C	0.1962	0,1434 to 0,2490	Yes	****	<0,0001
Col_4C vs. Col_32C	0.2607	0,2079 to 0,3136	Yes	****	<0,0001
Col_4C vs. 35S::UBP12_2C	0.0336	-0,03109 to 0,09830	No	ns	0.8174
Col_4C vs. 35S::UBP12_4C	-0.01464	-0,07933 to 0,05005	No	ns	0.9993
Col_4C vs. 35S::UBP12_8C	-0.1463	-0,2110 to -0,08165	Yes	****	<0,0001
Col_4C vs. 35S::UBP12_16C	0.186	0,1213 to 0,2507	Yes	****	<0,0001
Col_4C vs. 35S::UBP12_32C	0.2607	0,1960 to 0,3254	Yes	****	<0,0001
Col_8C vs. Col_16C	0.3965	0,3437 to 0,4494	Yes	****	<0,0001
Col_8C vs. Col_32C	0.4611	0,4083 to 0,5139	Yes	****	<0,0001
Col_8C vs. 35S::UBP12_2C	0.234	0,1693 to 0,2987	Yes	****	<0,0001
Col_8C vs. 35S::UBP12_4C	0.1857	0,1210 to 0,2504	Yes	****	<0,0001
Col_8C vs. 35S::UBP12_8C	0.05401	-0,01069 to 0,1187	No	ns	0.1938
Col_8C vs. 35S::UBP12_16C	0.3864	0,3217 to 0,4511	Yes	****	<0,0001
Col_8C vs. 35S::UBP12_32C	0.4611	0,3964 to 0,5257	Yes	****	<0,0001
Col_16C vs. Col_32C	0.06455	0,01173 to 0,1174	Yes	**	0.0048
Col_16C vs. 35S::UBP12_2C	-0.1626	-0,2273 to -0,09790	Yes	****	<0,0001
Col_16C vs. 35S::UBP12_4C	-0.2108	-0,2755 to -0,1461	Yes	****	<0,0001
Col_16C vs. 35S::UBP12_8C	-0.3425	-0,4072 to -0,2778	Yes	****	<0,0001
Col_16C vs. 35S::UBP12_16C	-0.01019	-0,07488 to 0,05451	No	ns	>0,9999
Col_16C vs. 35S::UBP12_32C	0.06451	-0,0001862 to 0,1292	No	ns	0.0514
Col_32C vs. 35S::UBP12_2C	-0.2271	-0,2918 to -0,1624	Yes	****	<0,0001
Col_32C vs. 35S::UBP12_4C	-0.2754	-0,3401 to -0,2107	Yes	****	<0,0001
Col_32C vs. 35S::UBP12_8C	-0.4071	-0,4718 to -0,3424	Yes	****	<0,0001
Col_32C vs. 35S::UBP12_16C	-0.07474	-0,1394 to -0,01005	Yes	*	0.0102
Col_32C vs. 35S::UBP12_32C	-4.483e-05	-0,06474 to 0,06465	No	ns	>0,9999
35S::UBP12_2C vs. 35S::UBP12_4C	-0.04824	-0,1229 to 0,02646	No	ns	0.5561
35S::UBP12_2C vs. 35S::UBP12_8C	-0.1799	-0,2547 to -0,1052	Yes	****	<0,0001
35S::UBP12_2C vs. 35S::UBP12_16C	0.1524	0,07770 to 0,2271	Yes	****	<0,0001
35S::UBP12_2C vs. 35S::UBP12_32C	0.2271	0,1524 to 0,3018	Yes	****	<0,0001
35S::UBP12_4C vs. 35S::UBP12_8C	-0.1317	-0,2064 to -0,05700	Yes	****	<0,0001
35S::UBP12_4C vs. 35S::UBP12_16C	0.2006	0,1259 to 0,2753	Yes	****	<0,0001
35S::UBP12_4C vs. 35S::UBP12_32C	0.2753	0,2006 to 0,3500	Yes	****	<0,0001
35S::UBP12_8C vs. 35S::UBP12_16C	0.3324	0,2576 to 0,4071	Yes	****	<0,0001
35S::UBP12_8C vs. 35S::UBP12_32C	0.407	0,3323 to 0,4817	Yes	****	<0,0001
35S::UBP12_16C vs. 35S::UBP12_32C	0.0747	-7,084e-006 to 0,1494	No	ns	0.05
Test details	Predicted (LS) mean 1	Predicted (LS) mean 2	Predicted (LS) mean diff,	SE of diff,	N1	N2	q	DF
D9
Col_2C vs. Col_4C	0.7277	0.2723	0.4553	0.01654	6	6	38.92	245
Col_2C vs. Col_8C	0.7277	0	0.7277	0.01654	6	6	62.21	245
Col_2C vs. Col_16C	0.7277	1.11e-16	0.7277	0.01654	6	6	62.21	245
Col_2C vs. Col_32C	0.7277	8.327e-17	0.7277	0.01654	6	6	62.21	245
Col_2C vs. 35S::UBP12_2C	0.7277	0.7411	-0.01346	0.02026	6	3	0.9396	245
Col_2C vs. 35S::UBP12_4C	0.7277	0.2589	0.4688	0.02026	6	3	32.72	245
Col_2C vs. 35S::UBP12_8C	0.7277	2.776e-16	0.7277	0.02026	6	3	50.79	245
Col_2C vs. 35S::UBP12_16C	0.7277	1.943e-16	0.7277	0.02026	6	3	50.79	245
Col_2C vs. 35S::UBP12_32C	0.7277	0	0.7277	0.02026	6	3	50.79	245
Col_4C vs. Col_8C	0.2723	0	0.2723	0.01654	6	6	23.28	245
Col_4C vs. Col_16C	0.2723	1.11e-16	0.2723	0.01654	6	6	23.28	245
Col_4C vs. Col_32C	0.2723	8.327e-17	0.2723	0.01654	6	6	23.28	245
Col_4C vs. 35S::UBP12_2C	0.2723	0.7411	-0.4688	0.02026	6	3	32.72	245
Col_4C vs. 35S::UBP12_4C	0.2723	0.2589	0.01346	0.02026	6	3	0.9396	245
Col_4C vs. 35S::UBP12_8C	0.2723	2.776e-16	0.2723	0.02026	6	3	19.01	245
Col_4C vs. 35S::UBP12_16C	0.2723	1.943e-16	0.2723	0.02026	6	3	19.01	245
Col_4C vs. 35S::UBP12_32C	0.2723	0	0.2723	0.02026	6	3	19.01	245
Col_8C vs. Col_16C	0	1.11e-16	-1.11e-16	0.01654	6	6	9.491e-15	245
Col_8C vs. Col_32C	0	8.327e-17	-8.327e-17	0.01654	6	6	7.118e-15	245
Col_8C vs. 35S::UBP12_2C	0	0.7411	-0.7411	0.02026	6	3	51.73	245
Col_8C vs. 35S::UBP12_4C	0	0.2589	-0.2589	0.02026	6	3	18.07	245
Col_8C vs. 35S::UBP12_8C	0	2.776e-16	-2.776e-16	0.02026	6	3	1.937e-14	245
Col_8C vs. 35S::UBP12_16C	0	1.943e-16	-1.943e-16	0.02026	6	3	1.356e-14	245
Col_8C vs. 35S::UBP12_32C	0	0	0	0.02026	6	3	0	245
Col_16C vs. Col_32C	1.11e-16	8.327e-17	2.776e-17	0.01654	6	6	2.373e-15	245
Col_16C vs. 35S::UBP12_2C	1.11e-16	0.7411	-0.7411	0.02026	6	3	51.73	245
Col_16C vs. 35S::UBP12_4C	1.11e-16	0.2589	-0.2589	0.02026	6	3	18.07	245
Col_16C vs. 35S::UBP12_8C	1.11e-16	2.776e-16	-1.665e-16	0.02026	6	3	1.162e-14	245
Col_16C vs. 35S::UBP12_16C	1.11e-16	1.943e-16	-8.327e-17	0.02026	6	3	5.812e-15	245
Col_16C vs. 35S::UBP12_32C	1.11e-16	0	1.11e-16	0.02026	6	3	7.75e-15	245
Col_32C vs. 35S::UBP12_2C	8.327e-17	0.7411	-0.7411	0.02026	6	3	51.73	245
Col_32C vs. 35S::UBP12_4C	8.327e-17	0.2589	-0.2589	0.02026	6	3	18.07	245
Col_32C vs. 35S::UBP12_8C	8.327e-17	2.776e-16	-1.943e-16	0.02026	6	3	1.356e-14	245
Col_32C vs. 35S::UBP12_16C	8.327e-17	1.943e-16	-1.11e-16	0.02026	6	3	7.75e-15	245
Col_32C vs. 35S::UBP12_32C	8.327e-17	0	8.327e-17	0.02026	6	3	5.812e-15	245
35S::UBP12_2C vs. 35S::UBP12_4C	0.7411	0.2589	0.4822	0.02339	3	3	29.15	245
35S::UBP12_2C vs. 35S::UBP12_8C	0.7411	2.776e-16	0.7411	0.02339	3	3	44.8	245
35S::UBP12_2C vs. 35S::UBP12_16C	0.7411	1.943e-16	0.7411	0.02339	3	3	44.8	245
35S::UBP12_2C vs. 35S::UBP12_32C	0.7411	0	0.7411	0.02339	3	3	44.8	245
35S::UBP12_4C vs. 35S::UBP12_8C	0.2589	2.776e-16	0.2589	0.02339	3	3	15.65	245
35S::UBP12_4C vs. 35S::UBP12_16C	0.2589	1.943e-16	0.2589	0.02339	3	3	15.65	245
35S::UBP12_4C vs. 35S::UBP12_32C	0.2589	0	0.2589	0.02339	3	3	15.65	245
35S::UBP12_8C vs. 35S::UBP12_16C	2.776e-16	1.943e-16	8.327e-17	0.02339	3	3	5.034e-15	245
35S::UBP12_8C vs. 35S::UBP12_32C	2.776e-16	0	2.776e-16	0.02339	3	3	1.678e-14	245
35S::UBP12_16C vs. 35S::UBP12_32C	1.943e-16	0	1.943e-16	0.02339	3	3	1.174e-14	245
D12
Col_2C vs. Col_4C	0.4291	0.5171	-0.08804	0.01654	6	6	7.527	245
Col_2C vs. Col_8C	0.4291	0.04862	0.3804	0.01654	6	6	32.52	245
Col_2C vs. Col_16C	0.4291	0.004213	0.4249	0.01654	6	6	36.32	245
Col_2C vs. Col_32C	0.4291	0.0009827	0.4281	0.01654	6	6	36.6	245
Col_2C vs. 35S::UBP12_2C	0.4291	0.5317	-0.1026	0.02026	6	3	7.164	245
Col_2C vs. 35S::UBP12_4C	0.4291	0.4353	-0.006263	0.02026	6	3	0.4372	245
Col_2C vs. 35S::UBP12_8C	0.4291	0.03032	0.3988	0.02026	6	3	27.83	245
Col_2C vs. 35S::UBP12_16C	0.4291	0.002238	0.4268	0.02026	6	3	29.79	245
Col_2C vs. 35S::UBP12_32C	0.4291	0.000409	0.4287	0.02026	6	3	29.92	245
Col_4C vs. Col_8C	0.5171	0.04862	0.4685	0.01654	6	6	40.05	245
Col_4C vs. Col_16C	0.5171	0.004213	0.5129	0.01654	6	6	43.85	245
Col_4C vs. Col_32C	0.5171	0.0009827	0.5161	0.01654	6	6	44.12	245
Col_4C vs. 35S::UBP12_2C	0.5171	0.5317	-0.01459	0.02026	6	3	1.019	245
Col_4C vs. 35S::UBP12_4C	0.5171	0.4353	0.08178	0.02026	6	3	5.708	245
Col_4C vs. 35S::UBP12_8C	0.5171	0.03032	0.4868	0.02026	6	3	33.98	245
Col_4C vs. 35S::UBP12_16C	0.5171	0.002238	0.5149	0.02026	6	3	35.94	245
Col_4C vs. 35S::UBP12_32C	0.5171	0.000409	0.5167	0.02026	6	3	36.07	245
Col_8C vs. Col_16C	0.04862	0.004213	0.04441	0.01654	6	6	3.797	245
Col_8C vs. Col_32C	0.04862	0.0009827	0.04764	0.01654	6	6	4.073	245
Col_8C vs. 35S::UBP12_2C	0.04862	0.5317	-0.4831	0.02026	6	3	33.72	245
Col_8C vs. 35S::UBP12_4C	0.04862	0.4353	-0.3867	0.02026	6	3	26.99	245
Col_8C vs. 35S::UBP12_8C	0.04862	0.03032	0.01831	0.02026	6	3	1.278	245
Col_8C vs. 35S::UBP12_16C	0.04862	0.002238	0.04639	0.02026	6	3	3.238	245
Col_8C vs. 35S::UBP12_32C	0.04862	0.000409	0.04821	0.02026	6	3	3.365	245
Col_16C vs. Col_32C	0.004213	0.0009827	0.00323	0.01654	6	6	0.2761	245
Col_16C vs. 35S::UBP12_2C	0.004213	0.5317	-0.5275	0.02026	6	3	36.82	245
Col_16C vs. 35S::UBP12_4C	0.004213	0.4353	-0.4311	0.02026	6	3	30.09	245
Col_16C vs. 35S::UBP12_8C	0.004213	0.03032	-0.0261	0.02026	6	3	1.822	245
Col_16C vs. 35S::UBP12_16C	0.004213	0.002238	0.001974	0.02026	6	3	0.1378	245
Col_16C vs. 35S::UBP12_32C	0.004213	0.000409	0.003804	0.02026	6	3	0.2655	245
Col_32C vs. 35S::UBP12_2C	0.0009827	0.5317	-0.5307	0.02026	6	3	37.05	245
Col_32C vs. 35S::UBP12_4C	0.0009827	0.4353	-0.4343	0.02026	6	3	30.32	245
Col_32C vs. 35S::UBP12_8C	0.0009827	0.03032	-0.02933	0.02026	6	3	2.047	245
Col_32C vs. 35S::UBP12_16C	0.0009827	0.002238	-0.001256	0.02026	6	3	0.08765	245
Col_32C vs. 35S::UBP12_32C	0.0009827	0.000409	0.0005737	0.02026	6	3	0.04004	245
35S::UBP12_2C vs. 35S::UBP12_4C	0.5317	0.4353	0.09637	0.02339	3	3	5.826	245
35S::UBP12_2C vs. 35S::UBP12_8C	0.5317	0.03032	0.5014	0.02339	3	3	30.31	245
35S::UBP12_2C vs. 35S::UBP12_16C	0.5317	0.002238	0.5295	0.02339	3	3	32.01	245
35S::UBP12_2C vs. 35S::UBP12_32C	0.5317	0.000409	0.5313	0.02339	3	3	32.12	245
35S::UBP12_4C vs. 35S::UBP12_8C	0.4353	0.03032	0.405	0.02339	3	3	24.48	245
35S::UBP12_4C vs. 35S::UBP12_16C	0.4353	0.002238	0.4331	0.02339	3	3	26.18	245
35S::UBP12_4C vs. 35S::UBP12_32C	0.4353	0.000409	0.4349	0.02339	3	3	26.29	245
35S::UBP12_8C vs. 35S::UBP12_16C	0.03032	0.002238	0.02808	0.02339	3	3	1.697	245
35S::UBP12_8C vs. 35S::UBP12_32C	0.03032	0.000409	0.02991	0.02339	3	3	1.808	245
35S::UBP12_16C vs. 35S::UBP12_32C	0.002238	0.000409	0.001829	0.02339	3	3	0.1106	245
D15
Col_2C vs. Col_4C	0.2528	0.3684	-0.1155	0.01654	6	6	9.877	245
Col_2C vs. Col_8C	0.2528	0.3497	-0.09682	0.01654	6	6	8.277	245
Col_2C vs. Col_16C	0.2528	0.02742	0.2254	0.01654	6	6	19.27	245
Col_2C vs. Col_32C	0.2528	0.001665	0.2512	0.01654	6	6	21.47	245
Col_2C vs. 35S::UBP12_2C	0.2528	0.2753	-0.02242	0.02026	6	3	1.565	245
Col_2C vs. 35S::UBP12_4C	0.2528	0.427	-0.1742	0.02026	6	3	12.16	245
Col_2C vs. 35S::UBP12_8C	0.2528	0.282	-0.02911	0.02026	6	3	2.032	245
Col_2C vs. 35S::UBP12_16C	0.2528	0.01487	0.238	0.02026	6	3	16.61	245
Col_2C vs. 35S::UBP12_32C	0.2528	0.0008463	0.252	0.02026	6	3	17.59	245
Col_4C vs. Col_8C	0.3684	0.3497	0.01872	0.01654	6	6	1.6	245
Col_4C vs. Col_16C	0.3684	0.02742	0.341	0.01654	6	6	29.15	245
Col_4C vs. Col_32C	0.3684	0.001665	0.3667	0.01654	6	6	31.35	245
Col_4C vs. 35S::UBP12_2C	0.3684	0.2753	0.09311	0.02026	6	3	6.5	245
Col_4C vs. 35S::UBP12_4C	0.3684	0.427	-0.05866	0.02026	6	3	4.094	245
Col_4C vs. 35S::UBP12_8C	0.3684	0.282	0.08643	0.02026	6	3	6.033	245
Col_4C vs. 35S::UBP12_16C	0.3684	0.01487	0.3535	0.02026	6	3	24.68	245
Col_4C vs. 35S::UBP12_32C	0.3684	0.0008463	0.3675	0.02026	6	3	25.66	245
Col_8C vs. Col_16C	0.3497	0.02742	0.3222	0.01654	6	6	27.55	245
Col_8C vs. Col_32C	0.3497	0.001665	0.348	0.01654	6	6	29.75	245
Col_8C vs. 35S::UBP12_2C	0.3497	0.2753	0.0744	0.02026	6	3	5.193	245
Col_8C vs. 35S::UBP12_4C	0.3497	0.427	-0.07737	0.02026	6	3	5.401	245
Col_8C vs. 35S::UBP12_8C	0.3497	0.282	0.06771	0.02026	6	3	4.726	245
Col_8C vs. 35S::UBP12_16C	0.3497	0.01487	0.3348	0.02026	6	3	23.37	245
Col_8C vs. 35S::UBP12_32C	0.3497	0.0008463	0.3488	0.02026	6	3	24.35	245
Col_16C vs. Col_32C	0.02742	0.001665	0.02576	0.01654	6	6	2.202	245
Col_16C vs. 35S::UBP12_2C	0.02742	0.2753	-0.2478	0.02026	6	3	17.3	245
Col_16C vs. 35S::UBP12_4C	0.02742	0.427	-0.3996	0.02026	6	3	27.89	245
Col_16C vs. 35S::UBP12_8C	0.02742	0.282	-0.2545	0.02026	6	3	17.77	245
Col_16C vs. 35S::UBP12_16C	0.02742	0.01487	0.01256	0.02026	6	3	0.8764	245
Col_16C vs. 35S::UBP12_32C	0.02742	0.0008463	0.02658	0.02026	6	3	1.855	245
Col_32C vs. 35S::UBP12_2C	0.001665	0.2753	-0.2736	0.02026	6	3	19.1	245
Col_32C vs. 35S::UBP12_4C	0.001665	0.427	-0.4254	0.02026	6	3	29.69	245
Col_32C vs. 35S::UBP12_8C	0.001665	0.282	-0.2803	0.02026	6	3	19.57	245
Col_32C vs. 35S::UBP12_16C	0.001665	0.01487	-0.0132	0.02026	6	3	0.9217	245
Col_32C vs. 35S::UBP12_32C	0.001665	0.0008463	0.0008187	0.02026	6	3	0.05714	245
35S::UBP12_2C vs. 35S::UBP12_4C	0.2753	0.427	-0.1518	0.02339	3	3	9.175	245
35S::UBP12_2C vs. 35S::UBP12_8C	0.2753	0.282	-0.006689	0.02339	3	3	0.4044	245
35S::UBP12_2C vs. 35S::UBP12_16C	0.2753	0.01487	0.2604	0.02339	3	3	15.74	245
35S::UBP12_2C vs. 35S::UBP12_32C	0.2753	0.0008463	0.2744	0.02339	3	3	16.59	245
35S::UBP12_4C vs. 35S::UBP12_8C	0.427	0.282	0.1451	0.02339	3	3	8.77	245
35S::UBP12_4C vs. 35S::UBP12_16C	0.427	0.01487	0.4122	0.02339	3	3	24.92	245
35S::UBP12_4C vs. 35S::UBP12_32C	0.427	0.0008463	0.4262	0.02339	3	3	25.76	245
35S::UBP12_8C vs. 35S::UBP12_16C	0.282	0.01487	0.2671	0.02339	3	3	16.15	245
35S::UBP12_8C vs. 35S::UBP12_32C	0.282	0.0008463	0.2811	0.02339	3	3	16.99	245
35S::UBP12_16C vs. 35S::UBP12_32C	0.01487	0.0008463	0.01402	0.02339	3	3	0.8477	245
D18
Col_2C vs. Col_4C	0.226	0.3104	-0.08441	0.01654	6	6	7.216	245
Col_2C vs. Col_8C	0.226	0.4213	-0.1952	0.01654	6	6	16.69	245
Col_2C vs. Col_16C	0.226	0.03997	0.186	0.01654	6	6	15.91	245
Col_2C vs. Col_32C	0.226	0.002329	0.2237	0.01654	6	6	19.12	245
Col_2C vs. 35S::UBP12_2C	0.226	0.2473	-0.02128	0.02026	6	3	1.485	245
Col_2C vs. 35S::UBP12_4C	0.226	0.2929	-0.06687	0.02026	6	3	4.667	245
Col_2C vs. 35S::UBP12_8C	0.226	0.4087	-0.1827	0.02026	6	3	12.75	245
Col_2C vs. 35S::UBP12_16C	0.226	0.04856	0.1775	0.02026	6	3	12.39	245
Col_2C vs. 35S::UBP12_32C	0.226	0.00256	0.2235	0.02026	6	3	15.6	245
Col_4C vs. Col_8C	0.3104	0.4213	-0.1108	0.01654	6	6	9.476	245
Col_4C vs. Col_16C	0.3104	0.03997	0.2705	0.01654	6	6	23.12	245
Col_4C vs. Col_32C	0.3104	0.002329	0.3081	0.01654	6	6	26.34	245
Col_4C vs. 35S::UBP12_2C	0.3104	0.2473	0.06313	0.02026	6	3	4.406	245
Col_4C vs. 35S::UBP12_4C	0.3104	0.2929	0.01754	0.02026	6	3	1.224	245
Col_4C vs. 35S::UBP12_8C	0.3104	0.4087	-0.09828	0.02026	6	3	6.86	245
Col_4C vs. 35S::UBP12_16C	0.3104	0.04856	0.2619	0.02026	6	3	18.28	245
Col_4C vs. 35S::UBP12_32C	0.3104	0.00256	0.3079	0.02026	6	3	21.49	245
Col_8C vs. Col_16C	0.4213	0.03997	0.3813	0.01654	6	6	32.6	245
Col_8C vs. Col_32C	0.4213	0.002329	0.4189	0.01654	6	6	35.81	245
Col_8C vs. 35S::UBP12_2C	0.4213	0.2473	0.174	0.02026	6	3	12.14	245
Col_8C vs. 35S::UBP12_4C	0.4213	0.2929	0.1284	0.02026	6	3	8.961	245
Col_8C vs. 35S::UBP12_8C	0.4213	0.4087	0.01257	0.02026	6	3	0.8772	245
Col_8C vs. 35S::UBP12_16C	0.4213	0.04856	0.3727	0.02026	6	3	26.02	245
Col_8C vs. 35S::UBP12_32C	0.4213	0.00256	0.4187	0.02026	6	3	29.23	245
Col_16C vs. Col_32C	0.03997	0.002329	0.03764	0.01654	6	6	3.218	245
Col_16C vs. 35S::UBP12_2C	0.03997	0.2473	-0.2073	0.02026	6	3	14.47	245
Col_16C vs. 35S::UBP12_4C	0.03997	0.2929	-0.2529	0.02026	6	3	17.65	245
Col_16C vs. 35S::UBP12_8C	0.03997	0.4087	-0.3687	0.02026	6	3	25.74	245
Col_16C vs. 35S::UBP12_16C	0.03997	0.04856	-0.008597	0.02026	6	3	0.6001	245
Col_16C vs. 35S::UBP12_32C	0.03997	0.00256	0.03741	0.02026	6	3	2.611	245
Col_32C vs. 35S::UBP12_2C	0.002329	0.2473	-0.245	0.02026	6	3	17.1	245
Col_32C vs. 35S::UBP12_4C	0.002329	0.2929	-0.2906	0.02026	6	3	20.28	245
Col_32C vs. 35S::UBP12_8C	0.002329	0.4087	-0.4064	0.02026	6	3	28.37	245
Col_32C vs. 35S::UBP12_16C	0.002329	0.04856	-0.04624	0.02026	6	3	3.227	245
Col_32C vs. 35S::UBP12_32C	0.002329	0.00256	-0.0002305	0.02026	6	3	0.01609	245
35S::UBP12_2C vs. 35S::UBP12_4C	0.2473	0.2929	-0.04559	0.02339	3	3	2.756	245
35S::UBP12_2C vs. 35S::UBP12_8C	0.2473	0.4087	-0.1614	0.02339	3	3	9.757	245
35S::UBP12_2C vs. 35S::UBP12_16C	0.2473	0.04856	0.1987	0.02339	3	3	12.01	245
35S::UBP12_2C vs. 35S::UBP12_32C	0.2473	0.00256	0.2447	0.02339	3	3	14.79	245
35S::UBP12_4C vs. 35S::UBP12_8C	0.2929	0.4087	-0.1158	0.02339	3	3	7.001	245
35S::UBP12_4C vs. 35S::UBP12_16C	0.2929	0.04856	0.2443	0.02339	3	3	14.77	245
35S::UBP12_4C vs. 35S::UBP12_32C	0.2929	0.00256	0.2903	0.02339	3	3	17.55	245
35S::UBP12_8C vs. 35S::UBP12_16C	0.4087	0.04856	0.3601	0.02339	3	3	21.77	245
35S::UBP12_8C vs. 35S::UBP12_32C	0.4087	0.00256	0.4061	0.02339	3	3	24.55	245
35S::UBP12_16C vs. 35S::UBP12_32C	0.04856	0.00256	0.04601	0.02339	3	3	2.781	245
D21
Col_2C vs. Col_4C	0.2213	0.2634	-0.04206	0.01654	6	6	3.596	245
Col_2C vs. Col_8C	0.2213	0.4215	-0.2002	0.01654	6	6	17.11	245
Col_2C vs. Col_16C	0.2213	0.08922	0.1321	0.01654	6	6	11.3	245
Col_2C vs. Col_32C	0.2213	0.004523	0.2168	0.01654	6	6	18.54	245
Col_2C vs. 35S::UBP12_2C	0.2213	0.2486	-0.02723	0.02026	6	3	1.901	245
Col_2C vs. 35S::UBP12_4C	0.2213	0.2904	-0.0691	0.02026	6	3	4.824	245
Col_2C vs. 35S::UBP12_8C	0.2213	0.4024	-0.1811	0.02026	6	3	12.64	245
Col_2C vs. 35S::UBP12_16C	0.2213	0.05653	0.1648	0.02026	6	3	11.5	245
Col_2C vs. 35S::UBP12_32C	0.2213	0.002057	0.2193	0.02026	6	3	15.31	245
Col_4C vs. Col_8C	0.2634	0.4215	-0.1581	0.01654	6	6	13.52	245
Col_4C vs. Col_16C	0.2634	0.08922	0.1742	0.01654	6	6	14.89	245
Col_4C vs. Col_32C	0.2634	0.004523	0.2589	0.01654	6	6	22.13	245
Col_4C vs. 35S::UBP12_2C	0.2634	0.2486	0.01483	0.02026	6	3	1.035	245
Col_4C vs. 35S::UBP12_4C	0.2634	0.2904	-0.02704	0.02026	6	3	1.887	245
Col_4C vs. 35S::UBP12_8C	0.2634	0.4024	-0.139	0.02026	6	3	9.702	245
Col_4C vs. 35S::UBP12_16C	0.2634	0.05653	0.2069	0.02026	6	3	14.44	245
Col_4C vs. 35S::UBP12_32C	0.2634	0.002057	0.2613	0.02026	6	3	18.24	245
Col_8C vs. Col_16C	0.4215	0.08922	0.3323	0.01654	6	6	28.41	245
Col_8C vs. Col_32C	0.4215	0.004523	0.417	0.01654	6	6	35.65	245
Col_8C vs. 35S::UBP12_2C	0.4215	0.2486	0.1729	0.02026	6	3	12.07	245
Col_8C vs. 35S::UBP12_4C	0.4215	0.2904	0.1311	0.02026	6	3	9.149	245
Col_8C vs. 35S::UBP12_8C	0.4215	0.4024	0.01911	0.02026	6	3	1.334	245
Col_8C vs. 35S::UBP12_16C	0.4215	0.05653	0.365	0.02026	6	3	25.48	245
Col_8C vs. 35S::UBP12_32C	0.4215	0.002057	0.4195	0.02026	6	3	29.28	245
Col_16C vs. Col_32C	0.08922	0.004523	0.08469	0.01654	6	6	7.241	245
Col_16C vs. 35S::UBP12_2C	0.08922	0.2486	-0.1594	0.02026	6	3	11.12	245
Col_16C vs. 35S::UBP12_4C	0.08922	0.2904	-0.2012	0.02026	6	3	14.05	245
Col_16C vs. 35S::UBP12_8C	0.08922	0.4024	-0.3132	0.02026	6	3	21.86	245
Col_16C vs. 35S::UBP12_16C	0.08922	0.05653	0.03269	0.02026	6	3	2.282	245
Col_16C vs. 35S::UBP12_32C	0.08922	0.002057	0.08716	0.02026	6	3	6.084	245
Col_32C vs. 35S::UBP12_2C	0.004523	0.2486	-0.244	0.02026	6	3	17.04	245
Col_32C vs. 35S::UBP12_4C	0.004523	0.2904	-0.2859	0.02026	6	3	19.96	245
Col_32C vs. 35S::UBP12_8C	0.004523	0.4024	-0.3979	0.02026	6	3	27.77	245
Col_32C vs. 35S::UBP12_16C	0.004523	0.05653	-0.052	0.02026	6	3	3.63	245
Col_32C vs. 35S::UBP12_32C	0.004523	0.002057	0.002466	0.02026	6	3	0.1721	245
35S::UBP12_2C vs. 35S::UBP12_4C	0.2486	0.2904	-0.04187	0.02339	3	3	2.531	245
35S::UBP12_2C vs. 35S::UBP12_8C	0.2486	0.4024	-0.1538	0.02339	3	3	9.299	245
35S::UBP12_2C vs. 35S::UBP12_16C	0.2486	0.05653	0.192	0.02339	3	3	11.61	245
35S::UBP12_2C vs. 35S::UBP12_32C	0.2486	0.002057	0.2465	0.02339	3	3	14.9	245
35S::UBP12_4C vs. 35S::UBP12_8C	0.2904	0.4024	-0.112	0.02339	3	3	6.768	245
35S::UBP12_4C vs. 35S::UBP12_16C	0.2904	0.05653	0.2339	0.02339	3	3	14.14	245
35S::UBP12_4C vs. 35S::UBP12_32C	0.2904	0.002057	0.2884	0.02339	3	3	17.43	245
35S::UBP12_8C vs. 35S::UBP12_16C	0.4024	0.05653	0.3459	0.02339	3	3	20.91	245
35S::UBP12_8C vs. 35S::UBP12_32C	0.4024	0.002057	0.4003	0.02339	3	3	24.2	245
35S::UBP12_16C vs. 35S::UBP12_32C	0.05653	0.002057	0.05447	0.02339	3	3	3.293	245
D24
Col_2C vs. Col_4C	0.2176	0.2826	-0.06499	0.01654	6	6	5.556	245
Col_2C vs. Col_8C	0.2176	0.4524	-0.2347	0.01654	6	6	20.07	245
Col_2C vs. Col_16C	0.2176	0.04409	0.1736	0.01654	6	6	14.84	245
Col_2C vs. Col_32C	0.2176	0.00323	0.2144	0.01654	6	6	18.33	245
Col_2C vs. 35S::UBP12_2C	0.2176	0.2437	-0.02605	0.02026	6	3	1.819	245
Col_2C vs. 35S::UBP12_4C	0.2176	0.3339	-0.1163	0.02026	6	3	8.115	245
Col_2C vs. 35S::UBP12_8C	0.2176	0.3903	-0.1726	0.02026	6	3	12.05	245
Col_2C vs. 35S::UBP12_16C	0.2176	0.0312	0.1864	0.02026	6	3	13.01	245
Col_2C vs. 35S::UBP12_32C	0.2176	0.000935	0.2167	0.02026	6	3	15.13	245
Col_4C vs. Col_8C	0.2826	0.4524	-0.1698	0.01654	6	6	14.51	245
Col_4C vs. Col_16C	0.2826	0.04409	0.2385	0.01654	6	6	20.39	245
Col_4C vs. Col_32C	0.2826	0.00323	0.2794	0.01654	6	6	23.89	245
Col_4C vs. 35S::UBP12_2C	0.2826	0.2437	0.03894	0.02026	6	3	2.718	245
Col_4C vs. 35S::UBP12_4C	0.2826	0.3339	-0.05126	0.02026	6	3	3.578	245
Col_4C vs. 35S::UBP12_8C	0.2826	0.3903	-0.1076	0.02026	6	3	7.512	245
Col_4C vs. 35S::UBP12_16C	0.2826	0.0312	0.2514	0.02026	6	3	17.55	245
Col_4C vs. 35S::UBP12_32C	0.2826	0.000935	0.2817	0.02026	6	3	19.66	245
Col_8C vs. Col_16C	0.4524	0.04409	0.4083	0.01654	6	6	34.91	245
Col_8C vs. Col_32C	0.4524	0.00323	0.4492	0.01654	6	6	38.4	245
Col_8C vs. 35S::UBP12_2C	0.4524	0.2437	0.2087	0.02026	6	3	14.57	245
Col_8C vs. 35S::UBP12_4C	0.4524	0.3339	0.1185	0.02026	6	3	8.271	245
Col_8C vs. 35S::UBP12_8C	0.4524	0.3903	0.06213	0.02026	6	3	4.337	245
Col_8C vs. 35S::UBP12_16C	0.4524	0.0312	0.4212	0.02026	6	3	29.4	245
Col_8C vs. 35S::UBP12_32C	0.4524	0.000935	0.4515	0.02026	6	3	31.51	245
Col_16C vs. Col_32C	0.04409	0.00323	0.04086	0.01654	6	6	3.493	245
Col_16C vs. 35S::UBP12_2C	0.04409	0.2437	-0.1996	0.02026	6	3	13.93	245
Col_16C vs. 35S::UBP12_4C	0.04409	0.3339	-0.2898	0.02026	6	3	20.23	245
Col_16C vs. 35S::UBP12_8C	0.04409	0.3903	-0.3462	0.02026	6	3	24.16	245
Col_16C vs. 35S::UBP12_16C	0.04409	0.0312	0.01289	0.02026	6	3	0.8996	245
Col_16C vs. 35S::UBP12_32C	0.04409	0.000935	0.04316	0.02026	6	3	3.012	245
Col_32C vs. 35S::UBP12_2C	0.00323	0.2437	-0.2405	0.02026	6	3	16.79	245
Col_32C vs. 35S::UBP12_4C	0.00323	0.3339	-0.3307	0.02026	6	3	23.08	245
Col_32C vs. 35S::UBP12_8C	0.00323	0.3903	-0.387	0.02026	6	3	27.02	245
Col_32C vs. 35S::UBP12_16C	0.00323	0.0312	-0.02797	0.02026	6	3	1.953	245
Col_32C vs. 35S::UBP12_32C	0.00323	0.000935	0.002295	0.02026	6	3	0.1602	245
35S::UBP12_2C vs. 35S::UBP12_4C	0.2437	0.3339	-0.0902	0.02339	3	3	5.453	245
35S::UBP12_2C vs. 35S::UBP12_8C	0.2437	0.3903	-0.1466	0.02339	3	3	8.86	245
35S::UBP12_2C vs. 35S::UBP12_16C	0.2437	0.0312	0.2125	0.02339	3	3	12.85	245
35S::UBP12_2C vs. 35S::UBP12_32C	0.2437	0.000935	0.2428	0.02339	3	3	14.68	245
35S::UBP12_4C vs. 35S::UBP12_8C	0.3339	0.3903	-0.05636	0.02339	3	3	3.407	245
35S::UBP12_4C vs. 35S::UBP12_16C	0.3339	0.0312	0.3027	0.02339	3	3	18.3	245
35S::UBP12_4C vs. 35S::UBP12_32C	0.3339	0.000935	0.333	0.02339	3	3	20.13	245
35S::UBP12_8C vs. 35S::UBP12_16C	0.3903	0.0312	0.3591	0.02339	3	3	21.71	245
35S::UBP12_8C vs. 35S::UBP12_32C	0.3903	0.000935	0.3893	0.02339	3	3	23.53	245
35S::UBP12_16C vs. 35S::UBP12_32C	0.0312	0.000935	0.03027	0.02339	3	3	1.83	245
D27
Col_2C vs. Col_4C	0.2011	0.2639	-0.06274	0.01654	6	6	5.363	245
Col_2C vs. Col_8C	0.2011	0.4642	-0.2631	0.01654	6	6	22.49	245
Col_2C vs. Col_16C	0.2011	0.06767	0.1335	0.01654	6	6	11.41	245
Col_2C vs. Col_32C	0.2011	0.00312	0.198	0.01654	6	6	16.93	245
Col_2C vs. 35S::UBP12_2C	0.2011	0.2303	-0.02914	0.02026	6	3	2.034	245
Col_2C vs. 35S::UBP12_4C	0.2011	0.2785	-0.07738	0.02026	6	3	5.401	245
Col_2C vs. 35S::UBP12_8C	0.2011	0.4102	-0.2091	0.02026	6	3	14.59	245
Col_2C vs. 35S::UBP12_16C	0.2011	0.07786	0.1233	0.02026	6	3	8.604	245
Col_2C vs. 35S::UBP12_32C	0.2011	0.003164	0.198	0.02026	6	3	13.82	245
Col_4C vs. Col_8C	0.2639	0.4642	-0.2004	0.01654	6	6	17.13	245
Col_4C vs. Col_16C	0.2639	0.06767	0.1962	0.01654	6	6	16.77	245
Col_4C vs. Col_32C	0.2639	0.00312	0.2607	0.01654	6	6	22.29	245
Col_4C vs. 35S::UBP12_2C	0.2639	0.2303	0.0336	0.02026	6	3	2.345	245
Col_4C vs. 35S::UBP12_4C	0.2639	0.2785	-0.01464	0.02026	6	3	1.022	245
Col_4C vs. 35S::UBP12_8C	0.2639	0.4102	-0.1463	0.02026	6	3	10.22	245
Col_4C vs. 35S::UBP12_16C	0.2639	0.07786	0.186	0.02026	6	3	12.98	245
Col_4C vs. 35S::UBP12_32C	0.2639	0.003164	0.2607	0.02026	6	3	18.2	245
Col_8C vs. Col_16C	0.4642	0.06767	0.3965	0.01654	6	6	33.9	245
Col_8C vs. Col_32C	0.4642	0.00312	0.4611	0.01654	6	6	39.42	245
Col_8C vs. 35S::UBP12_2C	0.4642	0.2303	0.234	0.02026	6	3	16.33	245
Col_8C vs. 35S::UBP12_4C	0.4642	0.2785	0.1857	0.02026	6	3	12.96	245
Col_8C vs. 35S::UBP12_8C	0.4642	0.4102	0.05401	0.02026	6	3	3.77	245
Col_8C vs. 35S::UBP12_16C	0.4642	0.07786	0.3864	0.02026	6	3	26.97	245
Col_8C vs. 35S::UBP12_32C	0.4642	0.003164	0.4611	0.02026	6	3	32.18	245
Col_16C vs. Col_32C	0.06767	0.00312	0.06455	0.01654	6	6	5.519	245
Col_16C vs. 35S::UBP12_2C	0.06767	0.2303	-0.1626	0.02026	6	3	11.35	245
Col_16C vs. 35S::UBP12_4C	0.06767	0.2785	-0.2108	0.02026	6	3	14.72	245
Col_16C vs. 35S::UBP12_8C	0.06767	0.4102	-0.3425	0.02026	6	3	23.91	245
Col_16C vs. 35S::UBP12_16C	0.06767	0.07786	-0.01019	0.02026	6	3	0.7111	245
Col_16C vs. 35S::UBP12_32C	0.06767	0.003164	0.06451	0.02026	6	3	4.503	245
Col_32C vs. 35S::UBP12_2C	0.00312	0.2303	-0.2271	0.02026	6	3	15.86	245
Col_32C vs. 35S::UBP12_4C	0.00312	0.2785	-0.2754	0.02026	6	3	19.22	245
Col_32C vs. 35S::UBP12_8C	0.00312	0.4102	-0.4071	0.02026	6	3	28.42	245
Col_32C vs. 35S::UBP12_16C	0.00312	0.07786	-0.07474	0.02026	6	3	5.217	245
Col_32C vs. 35S::UBP12_32C	0.00312	0.003164	-4.483e-05	0.02026	6	3	0.003129	245
35S::UBP12_2C vs. 35S::UBP12_4C	0.2303	0.2785	-0.04824	0.02339	3	3	2.916	245
35S::UBP12_2C vs. 35S::UBP12_8C	0.2303	0.4102	-0.1799	0.02339	3	3	10.88	245
35S::UBP12_2C vs. 35S::UBP12_16C	0.2303	0.07786	0.1524	0.02339	3	3	9.213	245
35S::UBP12_2C vs. 35S::UBP12_32C	0.2303	0.003164	0.2271	0.02339	3	3	13.73	245
35S::UBP12_4C vs. 35S::UBP12_8C	0.2785	0.4102	-0.1317	0.02339	3	3	7.962	245
35S::UBP12_4C vs. 35S::UBP12_16C	0.2785	0.07786	0.2006	0.02339	3	3	12.13	245
35S::UBP12_4C vs. 35S::UBP12_32C	0.2785	0.003164	0.2753	0.02339	3	3	16.64	245
35S::UBP12_8C vs. 35S::UBP12_16C	0.4102	0.07786	0.3324	0.02339	3	3	20.09	245
35S::UBP12_8C vs. 35S::UBP12_32C	0.4102	0.003164	0.407	0.02339	3	3	24.61	245
35S::UBP12_16C vs. 35S::UBP12_32C	0.07786	0.003164	0.0747	0.02339	3	3	4.515	245
Statisctical analysis 35S::UBP13_1.1
Table Analyzed	Col-0 vs 35S::UBP13_1.1
Two-way ANOVA	Ordinary
Alpha	0.05
Source of Variation	% of total variation	P value	P value summary	Significant?
Interaction	37.74	<0,0001	****	Yes
Row Factor	2.169e-12	>0,9999	ns	No
Column Factor	60.14	<0,0001	****	Yes
ANOVA table	SS (Type III)	DF	MS	F (DFn, DFd)	P value
Interaction	4.418	54	0.08181	F (54, 245) = 80,64	P<0,0001
Row Factor	2.54e-13	6	4.233e-14	F (6, 245) = 4,172e-011	P>0,9999
Column Factor	7.041	9	0.7823	F (9, 245) = 771,1	P<0,0001
Residual	0.2485	245	0.001014
Within each row, compare columns (simple effects within rows)
Number of families	7
Number of comparisons per family	45
Alpha	0.05
Tukey's multiple comparisons test	Predicted (LS) mean diff,	95,00% CI of diff,	Significant?	Summary	Adjusted P Value
D9
Col_2C vs. Col_4C	0.4553	0,3966 to 0,5140	Yes	****	<0,0001
Col_2C vs. Col_8C	0.7277	0,6689 to 0,7864	Yes	****	<0,0001
Col_2C vs. Col_16C	0.7277	0,6689 to 0,7864	Yes	****	<0,0001
Col_2C vs. Col_32C	0.7277	0,6689 to 0,7864	Yes	****	<0,0001
Col_2C vs. 35S::UBP13_2C	-0.01391	-0,08582 to 0,05801	No	ns	0.9998
Col_2C vs. 35S::UBP13_4C	0.4692	0,3973 to 0,5411	Yes	****	<0,0001
Col_2C vs. 35S::UBP13_8C	0.7277	0,6557 to 0,7996	Yes	****	<0,0001
Col_2C vs. 35S::UBP13_16C	0.7277	0,6557 to 0,7996	Yes	****	<0,0001
Col_2C vs. 35S::UBP13_32C	0.7277	0,6557 to 0,7996	Yes	****	<0,0001
Col_4C vs. Col_8C	0.2723	0,2136 to 0,3311	Yes	****	<0,0001
Col_4C vs. Col_16C	0.2723	0,2136 to 0,3311	Yes	****	<0,0001
Col_4C vs. Col_32C	0.2723	0,2136 to 0,3311	Yes	****	<0,0001
Col_4C vs. 35S::UBP13_2C	-0.4692	-0,5411 to -0,3973	Yes	****	<0,0001
Col_4C vs. 35S::UBP13_4C	0.01391	-0,05801 to 0,08582	No	ns	0.9998
Col_4C vs. 35S::UBP13_8C	0.2723	0,2004 to 0,3443	Yes	****	<0,0001
Col_4C vs. 35S::UBP13_16C	0.2723	0,2004 to 0,3443	Yes	****	<0,0001
Col_4C vs. 35S::UBP13_32C	0.2723	0,2004 to 0,3443	Yes	****	<0,0001
Col_8C vs. Col_16C	-2.776e-17	-0,05872 to 0,05872	No	ns	>0,9999
Col_8C vs. Col_32C	2.776e-17	-0,05872 to 0,05872	No	ns	>0,9999
Col_8C vs. 35S::UBP13_2C	-0.7416	-0,8135 to -0,6696	Yes	****	<0,0001
Col_8C vs. 35S::UBP13_4C	-0.2584	-0,3304 to -0,1865	Yes	****	<0,0001
Col_8C vs. 35S::UBP13_8C	-1.665e-16	-0,07192 to 0,07192	No	ns	>0,9999
Col_8C vs. 35S::UBP13_16C	-1.388e-16	-0,07192 to 0,07192	No	ns	>0,9999
Col_8C vs. 35S::UBP13_32C	1.11e-16	-0,07192 to 0,07192	No	ns	>0,9999
Col_16C vs. Col_32C	5.551e-17	-0,05872 to 0,05872	No	ns	>0,9999
Col_16C vs. 35S::UBP13_2C	-0.7416	-0,8135 to -0,6696	Yes	****	<0,0001
Col_16C vs. 35S::UBP13_4C	-0.2584	-0,3304 to -0,1865	Yes	****	<0,0001
Col_16C vs. 35S::UBP13_8C	-1.388e-16	-0,07192 to 0,07192	No	ns	>0,9999
Col_16C vs. 35S::UBP13_16C	-1.11e-16	-0,07192 to 0,07192	No	ns	>0,9999
Col_16C vs. 35S::UBP13_32C	1.388e-16	-0,07192 to 0,07192	No	ns	>0,9999
Col_32C vs. 35S::UBP13_2C	-0.7416	-0,8135 to -0,6696	Yes	****	<0,0001
Col_32C vs. 35S::UBP13_4C	-0.2584	-0,3304 to -0,1865	Yes	****	<0,0001
Col_32C vs. 35S::UBP13_8C	-1.943e-16	-0,07192 to 0,07192	No	ns	>0,9999
Col_32C vs. 35S::UBP13_16C	-1.665e-16	-0,07192 to 0,07192	No	ns	>0,9999
Col_32C vs. 35S::UBP13_32C	8.327e-17	-0,07192 to 0,07192	No	ns	>0,9999
35S::UBP13_2C vs. 35S::UBP13_4C	0.4831	0,4001 to 0,5662	Yes	****	<0,0001
35S::UBP13_2C vs. 35S::UBP13_8C	0.7416	0,6585 to 0,8246	Yes	****	<0,0001
35S::UBP13_2C vs. 35S::UBP13_16C	0.7416	0,6585 to 0,8246	Yes	****	<0,0001
35S::UBP13_2C vs. 35S::UBP13_32C	0.7416	0,6585 to 0,8246	Yes	****	<0,0001
35S::UBP13_4C vs. 35S::UBP13_8C	0.2584	0,1754 to 0,3415	Yes	****	<0,0001
35S::UBP13_4C vs. 35S::UBP13_16C	0.2584	0,1754 to 0,3415	Yes	****	<0,0001
35S::UBP13_4C vs. 35S::UBP13_32C	0.2584	0,1754 to 0,3415	Yes	****	<0,0001
35S::UBP13_8C vs. 35S::UBP13_16C	2.776e-17	-0,08304 to 0,08304	No	ns	>0,9999
35S::UBP13_8C vs. 35S::UBP13_32C	2.776e-16	-0,08304 to 0,08304	No	ns	>0,9999
35S::UBP13_16C vs. 35S::UBP13_32C	2.498e-16	-0,08304 to 0,08304	No	ns	>0,9999
D12
Col_2C vs. Col_4C	-0.08804	-0,1468 to -0,02932	Yes	***	0.0001
Col_2C vs. Col_8C	0.3804	0,3217 to 0,4392	Yes	****	<0,0001
Col_2C vs. Col_16C	0.4249	0,3661 to 0,4836	Yes	****	<0,0001
Col_2C vs. Col_32C	0.4281	0,3694 to 0,4868	Yes	****	<0,0001
Col_2C vs. 35S::UBP13_2C	-0.184	-0,2559 to -0,1121	Yes	****	<0,0001
Col_2C vs. 35S::UBP13_4C	0.07541	0,003492 to 0,1473	Yes	*	0.0314
Col_2C vs. 35S::UBP13_8C	0.3999	0,3280 to 0,4718	Yes	****	<0,0001
Col_2C vs. 35S::UBP13_16C	0.4261	0,3542 to 0,4980	Yes	****	<0,0001
Col_2C vs. 35S::UBP13_32C	0.4279	0,3560 to 0,4999	Yes	****	<0,0001
Col_4C vs. Col_8C	0.4685	0,4098 to 0,5272	Yes	****	<0,0001
Col_4C vs. Col_16C	0.5129	0,4542 to 0,5716	Yes	****	<0,0001
Col_4C vs. Col_32C	0.5161	0,4574 to 0,5748	Yes	****	<0,0001
Col_4C vs. 35S::UBP13_2C	-0.09596	-0,1679 to -0,02405	Yes	**	0.0012
Col_4C vs. 35S::UBP13_4C	0.1635	0,09154 to 0,2354	Yes	****	<0,0001
Col_4C vs. 35S::UBP13_8C	0.488	0,4160 to 0,5599	Yes	****	<0,0001
Col_4C vs. 35S::UBP13_16C	0.5141	0,4422 to 0,5860	Yes	****	<0,0001
Col_4C vs. 35S::UBP13_32C	0.516	0,4441 to 0,5879	Yes	****	<0,0001
Col_8C vs. Col_16C	0.04441	-0,01431 to 0,1031	No	ns	0.3215
Col_8C vs. Col_32C	0.04764	-0,01108 to 0,1064	No	ns	0.2277
Col_8C vs. 35S::UBP13_2C	-0.5645	-0,6364 to -0,4925	Yes	****	<0,0001
Col_8C vs. 35S::UBP13_4C	-0.305	-0,3770 to -0,2331	Yes	****	<0,0001
Col_8C vs. 35S::UBP13_8C	0.01947	-0,05244 to 0,09139	No	ns	0.9973
Col_8C vs. 35S::UBP13_16C	0.04564	-0,02628 to 0,1176	No	ns	0.5813
Col_8C vs. 35S::UBP13_32C	0.04749	-0,02442 to 0,1194	No	ns	0.5232
Col_16C vs. Col_32C	0.00323	-0,05549 to 0,06195	No	ns	>0,9999
Col_16C vs. 35S::UBP13_2C	-0.6089	-0,6808 to -0,5369	Yes	****	<0,0001
Col_16C vs. 35S::UBP13_4C	-0.3494	-0,4214 to -0,2775	Yes	****	<0,0001
Col_16C vs. 35S::UBP13_8C	-0.02494	-0,09685 to 0,04698	No	ns	0.9836
Col_16C vs. 35S::UBP13_16C	0.001228	-0,07069 to 0,07314	No	ns	>0,9999
Col_16C vs. 35S::UBP13_32C	0.00308	-0,06884 to 0,07500	No	ns	>0,9999
Col_32C vs. 35S::UBP13_2C	-0.6121	-0,6840 to -0,5402	Yes	****	<0,0001
Col_32C vs. 35S::UBP13_4C	-0.3527	-0,4246 to -0,2808	Yes	****	<0,0001
Col_32C vs. 35S::UBP13_8C	-0.02817	-0,1001 to 0,04375	No	ns	0.9631
Col_32C vs. 35S::UBP13_16C	-0.002002	-0,07392 to 0,06991	No	ns	>0,9999
Col_32C vs. 35S::UBP13_32C	-0.0001497	-0,07207 to 0,07177	No	ns	>0,9999
35S::UBP13_2C vs. 35S::UBP13_4C	0.2594	0,1764 to 0,3425	Yes	****	<0,0001
35S::UBP13_2C vs. 35S::UBP13_8C	0.5839	0,5009 to 0,6670	Yes	****	<0,0001
35S::UBP13_2C vs. 35S::UBP13_16C	0.6101	0,5270 to 0,6931	Yes	****	<0,0001
35S::UBP13_2C vs. 35S::UBP13_32C	0.6119	0,5289 to 0,6950	Yes	****	<0,0001
35S::UBP13_4C vs. 35S::UBP13_8C	0.3245	0,2415 to 0,4076	Yes	****	<0,0001
35S::UBP13_4C vs. 35S::UBP13_16C	0.3507	0,2676 to 0,4337	Yes	****	<0,0001
35S::UBP13_4C vs. 35S::UBP13_32C	0.3525	0,2695 to 0,4356	Yes	****	<0,0001
35S::UBP13_8C vs. 35S::UBP13_16C	0.02616	-0,05688 to 0,1092	No	ns	0.9917
35S::UBP13_8C vs. 35S::UBP13_32C	0.02802	-0,05502 to 0,1111	No	ns	0.9865
35S::UBP13_16C vs. 35S::UBP13_32C	0.001853	-0,08119 to 0,08489	No	ns	>0,9999
D15
Col_2C vs. Col_4C	-0.1155	-0,1743 to -0,05682	Yes	****	<0,0001
Col_2C vs. Col_8C	-0.09682	-0,1555 to -0,03810	Yes	****	<0,0001
Col_2C vs. Col_16C	0.2254	0,1667 to 0,2841	Yes	****	<0,0001
Col_2C vs. Col_32C	0.2512	0,1925 to 0,3099	Yes	****	<0,0001
Col_2C vs. 35S::UBP13_2C	-0.08907	-0,1610 to -0,01715	Yes	**	0.0039
Col_2C vs. 35S::UBP13_4C	-0.1701	-0,2420 to -0,09820	Yes	****	<0,0001
Col_2C vs. 35S::UBP13_8C	0.03352	-0,03840 to 0,1054	No	ns	0.8958
Col_2C vs. 35S::UBP13_16C	0.2381	0,1661 to 0,3100	Yes	****	<0,0001
Col_2C vs. 35S::UBP13_32C	0.2519	0,1799 to 0,3238	Yes	****	<0,0001
Col_4C vs. Col_8C	0.01872	-0,04000 to 0,07744	No	ns	0.991
Col_4C vs. Col_16C	0.341	0,2822 to 0,3997	Yes	****	<0,0001
Col_4C vs. Col_32C	0.3667	0,3080 to 0,4254	Yes	****	<0,0001
Col_4C vs. 35S::UBP13_2C	0.02647	-0,04544 to 0,09839	No	ns	0.9754
Col_4C vs. 35S::UBP13_4C	-0.05458	-0,1265 to 0,01734	No	ns	0.3167
Col_4C vs. 35S::UBP13_8C	0.1491	0,07714 to 0,2210	Yes	****	<0,0001
Col_4C vs. 35S::UBP13_16C	0.3536	0,2817 to 0,4255	Yes	****	<0,0001
Col_4C vs. 35S::UBP13_32C	0.3674	0,2955 to 0,4393	Yes	****	<0,0001
Col_8C vs. Col_16C	0.3222	0,2635 to 0,3810	Yes	****	<0,0001
Col_8C vs. Col_32C	0.348	0,2893 to 0,4067	Yes	****	<0,0001
Col_8C vs. 35S::UBP13_2C	0.007754	-0,06416 to 0,07967	No	ns	>0,9999
Col_8C vs. 35S::UBP13_4C	-0.07329	-0,1452 to -0,001377	Yes	*	0.0417
Col_8C vs. 35S::UBP13_8C	0.1303	0,05842 to 0,2023	Yes	****	<0,0001
Col_8C vs. 35S::UBP13_16C	0.3349	0,2630 to 0,4068	Yes	****	<0,0001
Col_8C vs. 35S::UBP13_32C	0.3487	0,2768 to 0,4206	Yes	****	<0,0001
Col_16C vs. Col_32C	0.02576	-0,03296 to 0,08448	No	ns	0.9261
Col_16C vs. 35S::UBP13_2C	-0.3145	-0,3864 to -0,2426	Yes	****	<0,0001
Col_16C vs. 35S::UBP13_4C	-0.3955	-0,4675 to -0,3236	Yes	****	<0,0001
Col_16C vs. 35S::UBP13_8C	-0.1919	-0,2638 to -0,1200	Yes	****	<0,0001
Col_16C vs. 35S::UBP13_16C	0.01263	-0,05929 to 0,08454	No	ns	>0,9999
Col_16C vs. 35S::UBP13_32C	0.02644	-0,04548 to 0,09835	No	ns	0.9756
Col_32C vs. 35S::UBP13_2C	-0.3403	-0,4122 to -0,2683	Yes	****	<0,0001
Col_32C vs. 35S::UBP13_4C	-0.4213	-0,4932 to -0,3494	Yes	****	<0,0001
Col_32C vs. 35S::UBP13_8C	-0.2177	-0,2896 to -0,1458	Yes	****	<0,0001
Col_32C vs. 35S::UBP13_16C	-0.01313	-0,08505 to 0,05878	No	ns	0.9999
Col_32C vs. 35S::UBP13_32C	0.0006773	-0,07124 to 0,07259	No	ns	>0,9999
35S::UBP13_2C vs. 35S::UBP13_4C	-0.08105	-0,1641 to 0,001994	No	ns	0.0623
35S::UBP13_2C vs. 35S::UBP13_8C	0.1226	0,03954 to 0,2056	Yes	***	0.0002
35S::UBP13_2C vs. 35S::UBP13_16C	0.3271	0,2441 to 0,4102	Yes	****	<0,0001
35S::UBP13_2C vs. 35S::UBP13_32C	0.3409	0,2579 to 0,4240	Yes	****	<0,0001
35S::UBP13_4C vs. 35S::UBP13_8C	0.2036	0,1206 to 0,2867	Yes	****	<0,0001
35S::UBP13_4C vs. 35S::UBP13_16C	0.4082	0,3251 to 0,4912	Yes	****	<0,0001
35S::UBP13_4C vs. 35S::UBP13_32C	0.422	0,3389 to 0,5050	Yes	****	<0,0001
35S::UBP13_8C vs. 35S::UBP13_16C	0.2045	0,1215 to 0,2876	Yes	****	<0,0001
35S::UBP13_8C vs. 35S::UBP13_32C	0.2183	0,1353 to 0,3014	Yes	****	<0,0001
35S::UBP13_16C vs. 35S::UBP13_32C	0.01381	-0,06923 to 0,09685	No	ns	>0,9999
D18
Col_2C vs. Col_4C	-0.08441	-0,1431 to -0,02569	Yes	***	0.0003
Col_2C vs. Col_8C	-0.1952	-0,2540 to -0,1365	Yes	****	<0,0001
Col_2C vs. Col_16C	0.186	0,1273 to 0,2448	Yes	****	<0,0001
Col_2C vs. Col_32C	0.2237	0,1650 to 0,2824	Yes	****	<0,0001
Col_2C vs. 35S::UBP13_2C	-0.06498	-0,1369 to 0,006931	No	ns	0.1153
Col_2C vs. 35S::UBP13_4C	-0.1338	-0,2058 to -0,06193	Yes	****	<0,0001
Col_2C vs. 35S::UBP13_8C	-0.1016	-0,1735 to -0,02968	Yes	***	0.0004
Col_2C vs. 35S::UBP13_16C	0.2055	0,1336 to 0,2774	Yes	****	<0,0001
Col_2C vs. 35S::UBP13_32C	0.225	0,1531 to 0,2969	Yes	****	<0,0001
Col_4C vs. Col_8C	-0.1108	-0,1696 to -0,05213	Yes	****	<0,0001
Col_4C vs. Col_16C	0.2705	0,2117 to 0,3292	Yes	****	<0,0001
Col_4C vs. Col_32C	0.3081	0,2494 to 0,3668	Yes	****	<0,0001
Col_4C vs. 35S::UBP13_2C	0.01942	-0,05250 to 0,09134	No	ns	0.9974
Col_4C vs. 35S::UBP13_4C	-0.04944	-0,1214 to 0,02248	No	ns	0.4629
Col_4C vs. 35S::UBP13_8C	-0.01719	-0,08910 to 0,05473	No	ns	0.999
Col_4C vs. 35S::UBP13_16C	0.2899	0,2180 to 0,3618	Yes	****	<0,0001
Col_4C vs. 35S::UBP13_32C	0.3094	0,2375 to 0,3813	Yes	****	<0,0001
Col_8C vs. Col_16C	0.3813	0,3226 to 0,4400	Yes	****	<0,0001
Col_8C vs. Col_32C	0.4189	0,3602 to 0,4777	Yes	****	<0,0001
Col_8C vs. 35S::UBP13_2C	0.1303	0,05835 to 0,2022	Yes	****	<0,0001
Col_8C vs. 35S::UBP13_4C	0.0614	-0,01051 to 0,1333	No	ns	0.169
Col_8C vs. 35S::UBP13_8C	0.09366	0,02174 to 0,1656	Yes	**	0.0018
Col_8C vs. 35S::UBP13_16C	0.4007	0,3288 to 0,4727	Yes	****	<0,0001
Col_8C vs. 35S::UBP13_32C	0.4203	0,3483 to 0,4922	Yes	****	<0,0001
Col_16C vs. Col_32C	0.03764	-0,02108 to 0,09636	No	ns	0.5669
Col_16C vs. 35S::UBP13_2C	-0.251	-0,3229 to -0,1791	Yes	****	<0,0001
Col_16C vs. 35S::UBP13_4C	-0.3199	-0,3918 to -0,2480	Yes	****	<0,0001
Col_16C vs. 35S::UBP13_8C	-0.2876	-0,3596 to -0,2157	Yes	****	<0,0001
Col_16C vs. 35S::UBP13_16C	0.01945	-0,05247 to 0,09136	No	ns	0.9974
Col_16C vs. 35S::UBP13_32C	0.03896	-0,03296 to 0,1109	No	ns	0.7775
Col_32C vs. 35S::UBP13_2C	-0.2887	-0,3606 to -0,2168	Yes	****	<0,0001
Col_32C vs. 35S::UBP13_4C	-0.3575	-0,4294 to -0,2856	Yes	****	<0,0001
Col_32C vs. 35S::UBP13_8C	-0.3253	-0,3972 to -0,2534	Yes	****	<0,0001
Col_32C vs. 35S::UBP13_16C	-0.01819	-0,09011 to 0,05373	No	ns	0.9984
Col_32C vs. 35S::UBP13_32C	0.00132	-0,07060 to 0,07324	No	ns	>0,9999
35S::UBP13_2C vs. 35S::UBP13_4C	-0.06886	-0,1519 to 0,01418	No	ns	0.2015
35S::UBP13_2C vs. 35S::UBP13_8C	-0.03661	-0,1196 to 0,04643	No	ns	0.924
35S::UBP13_2C vs. 35S::UBP13_16C	0.2705	0,1874 to 0,3535	Yes	****	<0,0001
35S::UBP13_2C vs. 35S::UBP13_32C	0.29	0,2070 to 0,3730	Yes	****	<0,0001
35S::UBP13_4C vs. 35S::UBP13_8C	0.03225	-0,05079 to 0,1153	No	ns	0.9651
35S::UBP13_4C vs. 35S::UBP13_16C	0.3393	0,2563 to 0,4224	Yes	****	<0,0001
35S::UBP13_4C vs. 35S::UBP13_32C	0.3589	0,2758 to 0,4419	Yes	****	<0,0001
35S::UBP13_8C vs. 35S::UBP13_16C	0.3071	0,2240 to 0,3901	Yes	****	<0,0001
35S::UBP13_8C vs. 35S::UBP13_32C	0.3266	0,2436 to 0,4096	Yes	****	<0,0001
35S::UBP13_16C vs. 35S::UBP13_32C	0.01951	-0,06353 to 0,1026	No	ns	0.9991
D21
Col_2C vs. Col_4C	-0.04206	-0,1008 to 0,01665	No	ns	0.4009
Col_2C vs. Col_8C	-0.2002	-0,2589 to -0,1415	Yes	****	<0,0001
Col_2C vs. Col_16C	0.1321	0,07340 to 0,1908	Yes	****	<0,0001
Col_2C vs. Col_32C	0.2168	0,1581 to 0,2755	Yes	****	<0,0001
Col_2C vs. 35S::UBP13_2C	-0.06878	-0,1407 to 0,003135	No	ns	0.0741
Col_2C vs. 35S::UBP13_4C	-0.08049	-0,1524 to -0,008578	Yes	*	0.0151
Col_2C vs. 35S::UBP13_8C	-0.1235	-0,1954 to -0,05155	Yes	****	<0,0001
Col_2C vs. 35S::UBP13_16C	0.161	0,08905 to 0,2329	Yes	****	<0,0001
Col_2C vs. 35S::UBP13_32C	0.2185	0,1466 to 0,2904	Yes	****	<0,0001
Col_4C vs. Col_8C	-0.1581	-0,2168 to -0,09939	Yes	****	<0,0001
Col_4C vs. Col_16C	0.1742	0,1155 to 0,2329	Yes	****	<0,0001
Col_4C vs. Col_32C	0.2589	0,2002 to 0,3176	Yes	****	<0,0001
Col_4C vs. 35S::UBP13_2C	-0.02672	-0,09863 to 0,04520	No	ns	0.9739
Col_4C vs. 35S::UBP13_4C	-0.03843	-0,1103 to 0,03349	No	ns	0.7911
Col_4C vs. 35S::UBP13_8C	-0.0814	-0,1533 to -0,009489	Yes	*	0.0132
Col_4C vs. 35S::UBP13_16C	0.203	0,1311 to 0,2749	Yes	****	<0,0001
Col_4C vs. 35S::UBP13_32C	0.2605	0,1886 to 0,3325	Yes	****	<0,0001
Col_8C vs. Col_16C	0.3323	0,2736 to 0,3910	Yes	****	<0,0001
Col_8C vs. Col_32C	0.417	0,3583 to 0,4757	Yes	****	<0,0001
Col_8C vs. 35S::UBP13_2C	0.1314	0,05948 to 0,2033	Yes	****	<0,0001
Col_8C vs. 35S::UBP13_4C	0.1197	0,04777 to 0,1916	Yes	****	<0,0001
Col_8C vs. 35S::UBP13_8C	0.07671	0,004793 to 0,1486	Yes	*	0.0262
Col_8C vs. 35S::UBP13_16C	0.3611	0,2892 to 0,4331	Yes	****	<0,0001
Col_8C vs. 35S::UBP13_32C	0.4187	0,3467 to 0,4906	Yes	****	<0,0001
Col_16C vs. Col_32C	0.08469	0,02598 to 0,1434	Yes	***	0.0003
Col_16C vs. 35S::UBP13_2C	-0.2009	-0,2728 to -0,1290	Yes	****	<0,0001
Col_16C vs. 35S::UBP13_4C	-0.2126	-0,2845 to -0,1407	Yes	****	<0,0001
Col_16C vs. 35S::UBP13_8C	-0.2556	-0,3275 to -0,1837	Yes	****	<0,0001
Col_16C vs. 35S::UBP13_16C	0.02884	-0,04308 to 0,1008	No	ns	0.9572
Col_16C vs. 35S::UBP13_32C	0.08635	0,01444 to 0,1583	Yes	**	0.0061
Col_32C vs. 35S::UBP13_2C	-0.2856	-0,3575 to -0,2137	Yes	****	<0,0001
Col_32C vs. 35S::UBP13_4C	-0.2973	-0,3692 to -0,2254	Yes	****	<0,0001
Col_32C vs. 35S::UBP13_8C	-0.3403	-0,4122 to -0,2684	Yes	****	<0,0001
Col_32C vs. 35S::UBP13_16C	-0.05585	-0,1278 to 0,01606	No	ns	0.2845
Col_32C vs. 35S::UBP13_32C	0.00166	-0,07026 to 0,07358	No	ns	>0,9999
35S::UBP13_2C vs. 35S::UBP13_4C	-0.01171	-0,09475 to 0,07133	No	ns	>0,9999
35S::UBP13_2C vs. 35S::UBP13_8C	-0.05469	-0,1377 to 0,02835	No	ns	0.5272
35S::UBP13_2C vs. 35S::UBP13_16C	0.2297	0,1467 to 0,3128	Yes	****	<0,0001
35S::UBP13_2C vs. 35S::UBP13_32C	0.2873	0,2042 to 0,3703	Yes	****	<0,0001
35S::UBP13_4C vs. 35S::UBP13_8C	-0.04298	-0,1260 to 0,04006	No	ns	0.8206
35S::UBP13_4C vs. 35S::UBP13_16C	0.2415	0,1584 to 0,3245	Yes	****	<0,0001
35S::UBP13_4C vs. 35S::UBP13_32C	0.299	0,2159 to 0,3820	Yes	****	<0,0001
35S::UBP13_8C vs. 35S::UBP13_16C	0.2844	0,2014 to 0,3675	Yes	****	<0,0001
35S::UBP13_8C vs. 35S::UBP13_32C	0.3419	0,2589 to 0,4250	Yes	****	<0,0001
35S::UBP13_16C vs. 35S::UBP13_32C	0.05751	-0,02553 to 0,1406	No	ns	0.4517
D24
Col_2C vs. Col_4C	-0.06499	-0,1237 to -0,006272	Yes	*	0.0173
Col_2C vs. Col_8C	-0.2347	-0,2935 to -0,1760	Yes	****	<0,0001
Col_2C vs. Col_16C	0.1736	0,1148 to 0,2323	Yes	****	<0,0001
Col_2C vs. Col_32C	0.2144	0,1557 to 0,2731	Yes	****	<0,0001
Col_2C vs. 35S::UBP13_2C	-0.02662	-0,09854 to 0,04530	No	ns	0.9745
Col_2C vs. 35S::UBP13_4C	-0.0643	-0,1362 to 0,007612	No	ns	0.1244
Col_2C vs. 35S::UBP13_8C	-0.2019	-0,2738 to -0,1300	Yes	****	<0,0001
Col_2C vs. 35S::UBP13_16C	0.1652	0,09332 to 0,2372	Yes	****	<0,0001
Col_2C vs. 35S::UBP13_32C	0.2158	0,1439 to 0,2878	Yes	****	<0,0001
Col_4C vs. Col_8C	-0.1698	-0,2285 to -0,1110	Yes	****	<0,0001
Col_4C vs. Col_16C	0.2385	0,1798 to 0,2973	Yes	****	<0,0001
Col_4C vs. Col_32C	0.2794	0,2207 to 0,3381	Yes	****	<0,0001
Col_4C vs. 35S::UBP13_2C	0.03837	-0,03354 to 0,1103	No	ns	0.7925
Col_4C vs. 35S::UBP13_4C	0.0006873	-0,07123 to 0,07260	No	ns	>0,9999
Col_4C vs. 35S::UBP13_8C	-0.1369	-0,2088 to -0,06501	Yes	****	<0,0001
Col_4C vs. 35S::UBP13_16C	0.2302	0,1583 to 0,3021	Yes	****	<0,0001
Col_4C vs. 35S::UBP13_32C	0.2808	0,2089 to 0,3527	Yes	****	<0,0001
Col_8C vs. Col_16C	0.4083	0,3496 to 0,4670	Yes	****	<0,0001
Col_8C vs. Col_32C	0.4492	0,3904 to 0,5079	Yes	****	<0,0001
Col_8C vs. 35S::UBP13_2C	0.2081	0,1362 to 0,2800	Yes	****	<0,0001
Col_8C vs. 35S::UBP13_4C	0.1704	0,09853 to 0,2424	Yes	****	<0,0001
Col_8C vs. 35S::UBP13_8C	0.03283	-0,03909 to 0,1047	No	ns	0.9071
Col_8C vs. 35S::UBP13_16C	0.4	0,3281 to 0,4719	Yes	****	<0,0001
Col_8C vs. 35S::UBP13_32C	0.4506	0,3787 to 0,5225	Yes	****	<0,0001
Col_16C vs. Col_32C	0.04086	-0,01786 to 0,09958	No	ns	0.4446
Col_16C vs. 35S::UBP13_2C	-0.2002	-0,2721 to -0,1283	Yes	****	<0,0001
Col_16C vs. 35S::UBP13_4C	-0.2379	-0,3098 to -0,1659	Yes	****	<0,0001
Col_16C vs. 35S::UBP13_8C	-0.3755	-0,4474 to -0,3036	Yes	****	<0,0001
Col_16C vs. 35S::UBP13_16C	-0.008317	-0,08023 to 0,06360	No	ns	>0,9999
Col_16C vs. 35S::UBP13_32C	0.04228	-0,02964 to 0,1142	No	ns	0.6844
Col_32C vs. 35S::UBP13_2C	-0.241	-0,3130 to -0,1691	Yes	****	<0,0001
Col_32C vs. 35S::UBP13_4C	-0.2787	-0,3506 to -0,2068	Yes	****	<0,0001
Col_32C vs. 35S::UBP13_8C	-0.4163	-0,4882 to -0,3444	Yes	****	<0,0001
Col_32C vs. 35S::UBP13_16C	-0.04918	-0,1211 to 0,02274	No	ns	0.4709
Col_32C vs. 35S::UBP13_32C	0.001418	-0,07050 to 0,07333	No	ns	>0,9999
35S::UBP13_2C vs. 35S::UBP13_4C	-0.03768	-0,1207 to 0,04536	No	ns	0.9102
35S::UBP13_2C vs. 35S::UBP13_8C	-0.1753	-0,2583 to -0,09225	Yes	****	<0,0001
35S::UBP13_2C vs. 35S::UBP13_16C	0.1919	0,1088 to 0,2749	Yes	****	<0,0001
35S::UBP13_2C vs. 35S::UBP13_32C	0.2425	0,1594 to 0,3255	Yes	****	<0,0001
35S::UBP13_4C vs. 35S::UBP13_8C	-0.1376	-0,2207 to -0,05457	Yes	****	<0,0001
35S::UBP13_4C vs. 35S::UBP13_16C	0.2295	0,1465 to 0,3126	Yes	****	<0,0001
35S::UBP13_4C vs. 35S::UBP13_32C	0.2801	0,1971 to 0,3632	Yes	****	<0,0001
35S::UBP13_8C vs. 35S::UBP13_16C	0.3672	0,2841 to 0,4502	Yes	****	<0,0001
35S::UBP13_8C vs. 35S::UBP13_32C	0.4178	0,3347 to 0,5008	Yes	****	<0,0001
35S::UBP13_16C vs. 35S::UBP13_32C	0.0506	-0,03244 to 0,1336	No	ns	0.6379
D27
Col_2C vs. Col_4C	-0.06274	-0,1215 to -0,004018	Yes	*	0.0257
Col_2C vs. Col_8C	-0.2631	-0,3218 to -0,2044	Yes	****	<0,0001
Col_2C vs. Col_16C	0.1335	0,07474 to 0,1922	Yes	****	<0,0001
Col_2C vs. Col_32C	0.198	0,1393 to 0,2567	Yes	****	<0,0001
Col_2C vs. 35S::UBP13_2C	-0.05604	-0,1280 to 0,01587	No	ns	0.2799
Col_2C vs. 35S::UBP13_4C	-0.0489	-0,1208 to 0,02302	No	ns	0.4796
Col_2C vs. 35S::UBP13_8C	-0.1486	-0,2205 to -0,07664	Yes	****	<0,0001
Col_2C vs. 35S::UBP13_16C	0.06516	-0,006754 to 0,1371	No	ns	0.1131
Col_2C vs. 35S::UBP13_32C	0.194	0,1221 to 0,2659	Yes	****	<0,0001
Col_4C vs. Col_8C	-0.2004	-0,2591 to -0,1416	Yes	****	<0,0001
Col_4C vs. Col_16C	0.1962	0,1375 to 0,2549	Yes	****	<0,0001
Col_4C vs. Col_32C	0.2607	0,2020 to 0,3195	Yes	****	<0,0001
Col_4C vs. 35S::UBP13_2C	0.006693	-0,06522 to 0,07861	No	ns	>0,9999
Col_4C vs. 35S::UBP13_4C	0.01384	-0,05807 to 0,08576	No	ns	0.9998
Col_4C vs. 35S::UBP13_8C	-0.08582	-0,1577 to -0,01391	Yes	**	0.0066
Col_4C vs. 35S::UBP13_16C	0.1279	0,05598 to 0,1998	Yes	****	<0,0001
Col_4C vs. 35S::UBP13_32C	0.2567	0,1848 to 0,3286	Yes	****	<0,0001
Col_8C vs. Col_16C	0.3965	0,3378 to 0,4553	Yes	****	<0,0001
Col_8C vs. Col_32C	0.4611	0,4024 to 0,5198	Yes	****	<0,0001
Col_8C vs. 35S::UBP13_2C	0.207	0,1351 to 0,2790	Yes	****	<0,0001
Col_8C vs. 35S::UBP13_4C	0.2142	0,1423 to 0,2861	Yes	****	<0,0001
Col_8C vs. 35S::UBP13_8C	0.1145	0,04262 to 0,1864	Yes	****	<0,0001
Col_8C vs. 35S::UBP13_16C	0.3283	0,2563 to 0,4002	Yes	****	<0,0001
Col_8C vs. 35S::UBP13_32C	0.4571	0,3851 to 0,5290	Yes	****	<0,0001
Col_16C vs. Col_32C	0.06455	0,005834 to 0,1233	Yes	*	0.0187
Col_16C vs. 35S::UBP13_2C	-0.1895	-0,2614 to -0,1176	Yes	****	<0,0001
Col_16C vs. 35S::UBP13_4C	-0.1824	-0,2543 to -0,1104	Yes	****	<0,0001
Col_16C vs. 35S::UBP13_8C	-0.282	-0,3539 to -0,2101	Yes	****	<0,0001
Col_16C vs. 35S::UBP13_16C	-0.06829	-0,1402 to 0,003623	No	ns	0.0786
Col_16C vs. 35S::UBP13_32C	0.06052	-0,01140 to 0,1324	No	ns	0.1848
Col_32C vs. 35S::UBP13_2C	-0.2541	-0,3260 to -0,1821	Yes	****	<0,0001
Col_32C vs. 35S::UBP13_4C	-0.2469	-0,3188 to -0,1750	Yes	****	<0,0001
Col_32C vs. 35S::UBP13_8C	-0.3466	-0,4185 to -0,2747	Yes	****	<0,0001
Col_32C vs. 35S::UBP13_16C	-0.1328	-0,2048 to -0,06093	Yes	****	<0,0001
Col_32C vs. 35S::UBP13_32C	-0.004036	-0,07595 to 0,06788	No	ns	>0,9999
35S::UBP13_2C vs. 35S::UBP13_4C	0.007148	-0,07589 to 0,09019	No	ns	>0,9999
35S::UBP13_2C vs. 35S::UBP13_8C	-0.09252	-0,1756 to -0,009474	Yes	*	0.016
35S::UBP13_2C vs. 35S::UBP13_16C	0.1212	0,03816 to 0,2042	Yes	***	0.0002
35S::UBP13_2C vs. 35S::UBP13_32C	0.25	0,1670 to 0,3331	Yes	****	<0,0001
35S::UBP13_4C vs. 35S::UBP13_8C	-0.09966	-0,1827 to -0,01662	Yes	**	0.0061
35S::UBP13_4C vs. 35S::UBP13_16C	0.1141	0,03102 to 0,1971	Yes	***	0.0007
35S::UBP13_4C vs. 35S::UBP13_32C	0.2429	0,1598 to 0,3259	Yes	****	<0,0001
35S::UBP13_8C vs. 35S::UBP13_16C	0.2137	0,1307 to 0,2968	Yes	****	<0,0001
35S::UBP13_8C vs. 35S::UBP13_32C	0.3425	0,2595 to 0,4256	Yes	****	<0,0001
35S::UBP13_16C vs. 35S::UBP13_32C	0.1288	0,04577 to 0,2118	Yes	****	<0,0001
Test details	Predicted (LS) mean 1	Predicted (LS) mean 2	Predicted (LS) mean diff,	SE of diff,	N1	N2	q	DF
D9
Col_2C vs. Col_4C	0.7277	0.2723	0.4553	0.01839	6	6	35.02	245
Col_2C vs. Col_8C	0.7277	1.11e-16	0.7277	0.01839	6	6	55.96	245
Col_2C vs. Col_16C	0.7277	1.388e-16	0.7277	0.01839	6	6	55.96	245
Col_2C vs. Col_32C	0.7277	8.327e-17	0.7277	0.01839	6	6	55.96	245
Col_2C vs. 35S::UBP13_2C	0.7277	0.7416	-0.01391	0.02252	6	3	0.8732	245
Col_2C vs. 35S::UBP13_4C	0.7277	0.2584	0.4692	0.02252	6	3	29.46	245
Col_2C vs. 35S::UBP13_8C	0.7277	2.776e-16	0.7277	0.02252	6	3	45.69	245
Col_2C vs. 35S::UBP13_16C	0.7277	2.498e-16	0.7277	0.02252	6	3	45.69	245
Col_2C vs. 35S::UBP13_32C	0.7277	0	0.7277	0.02252	6	3	45.69	245
Col_4C vs. Col_8C	0.2723	1.11e-16	0.2723	0.01839	6	6	20.94	245
Col_4C vs. Col_16C	0.2723	1.388e-16	0.2723	0.01839	6	6	20.94	245
Col_4C vs. Col_32C	0.2723	8.327e-17	0.2723	0.01839	6	6	20.94	245
Col_4C vs. 35S::UBP13_2C	0.2723	0.7416	-0.4692	0.02252	6	3	29.46	245
Col_4C vs. 35S::UBP13_4C	0.2723	0.2584	0.01391	0.02252	6	3	0.8732	245
Col_4C vs. 35S::UBP13_8C	0.2723	2.776e-16	0.2723	0.02252	6	3	17.1	245
Col_4C vs. 35S::UBP13_16C	0.2723	2.498e-16	0.2723	0.02252	6	3	17.1	245
Col_4C vs. 35S::UBP13_32C	0.2723	0	0.2723	0.02252	6	3	17.1	245
Col_8C vs. Col_16C	1.11e-16	1.388e-16	-2.776e-17	0.01839	6	6	2.135e-15	245
Col_8C vs. Col_32C	1.11e-16	8.327e-17	2.776e-17	0.01839	6	6	2.135e-15	245
Col_8C vs. 35S::UBP13_2C	1.11e-16	0.7416	-0.7416	0.02252	6	3	46.56	245
Col_8C vs. 35S::UBP13_4C	1.11e-16	0.2584	-0.2584	0.02252	6	3	16.23	245
Col_8C vs. 35S::UBP13_8C	1.11e-16	2.776e-16	-1.665e-16	0.02252	6	3	1.046e-14	245
Col_8C vs. 35S::UBP13_16C	1.11e-16	2.498e-16	-1.388e-16	0.02252	6	3	8.714e-15	245
Col_8C vs. 35S::UBP13_32C	1.11e-16	0	1.11e-16	0.02252	6	3	6.971e-15	245
Col_16C vs. Col_32C	1.388e-16	8.327e-17	5.551e-17	0.01839	6	6	4.269e-15	245
Col_16C vs. 35S::UBP13_2C	1.388e-16	0.7416	-0.7416	0.02252	6	3	46.56	245
Col_16C vs. 35S::UBP13_4C	1.388e-16	0.2584	-0.2584	0.02252	6	3	16.23	245
Col_16C vs. 35S::UBP13_8C	1.388e-16	2.776e-16	-1.388e-16	0.02252	6	3	8.714e-15	245
Col_16C vs. 35S::UBP13_16C	1.388e-16	2.498e-16	-1.11e-16	0.02252	6	3	6.971e-15	245
Col_16C vs. 35S::UBP13_32C	1.388e-16	0	1.388e-16	0.02252	6	3	8.714e-15	245
Col_32C vs. 35S::UBP13_2C	8.327e-17	0.7416	-0.7416	0.02252	6	3	46.56	245
Col_32C vs. 35S::UBP13_4C	8.327e-17	0.2584	-0.2584	0.02252	6	3	16.23	245
Col_32C vs. 35S::UBP13_8C	8.327e-17	2.776e-16	-1.943e-16	0.02252	6	3	1.22e-14	245
Col_32C vs. 35S::UBP13_16C	8.327e-17	2.498e-16	-1.665e-16	0.02252	6	3	1.046e-14	245
Col_32C vs. 35S::UBP13_32C	8.327e-17	0	8.327e-17	0.02252	6	3	5.229e-15	245
35S::UBP13_2C vs. 35S::UBP13_4C	0.7416	0.2584	0.4831	0.02601	3	3	26.27	245
35S::UBP13_2C vs. 35S::UBP13_8C	0.7416	2.776e-16	0.7416	0.02601	3	3	40.33	245
35S::UBP13_2C vs. 35S::UBP13_16C	0.7416	2.498e-16	0.7416	0.02601	3	3	40.33	245
35S::UBP13_2C vs. 35S::UBP13_32C	0.7416	0	0.7416	0.02601	3	3	40.33	245
35S::UBP13_4C vs. 35S::UBP13_8C	0.2584	2.776e-16	0.2584	0.02601	3	3	14.05	245
35S::UBP13_4C vs. 35S::UBP13_16C	0.2584	2.498e-16	0.2584	0.02601	3	3	14.05	245
35S::UBP13_4C vs. 35S::UBP13_32C	0.2584	0	0.2584	0.02601	3	3	14.05	245
35S::UBP13_8C vs. 35S::UBP13_16C	2.776e-16	2.498e-16	2.776e-17	0.02601	3	3	1.509e-15	245
35S::UBP13_8C vs. 35S::UBP13_32C	2.776e-16	0	2.776e-16	0.02601	3	3	1.509e-14	245
35S::UBP13_16C vs. 35S::UBP13_32C	2.498e-16	0	2.498e-16	0.02601	3	3	1.358e-14	245
D12
Col_2C vs. Col_4C	0.4291	0.5171	-0.08804	0.01839	6	6	6.771	245
Col_2C vs. Col_8C	0.4291	0.04862	0.3804	0.01839	6	6	29.26	245
Col_2C vs. Col_16C	0.4291	0.004213	0.4249	0.01839	6	6	32.67	245
Col_2C vs. Col_32C	0.4291	0.0009827	0.4281	0.01839	6	6	32.92	245
Col_2C vs. 35S::UBP13_2C	0.4291	0.6131	-0.184	0.02252	6	3	11.55	245
Col_2C vs. 35S::UBP13_4C	0.4291	0.3537	0.07541	0.02252	6	3	4.735	245
Col_2C vs. 35S::UBP13_8C	0.4291	0.02915	0.3999	0.02252	6	3	25.11	245
Col_2C vs. 35S::UBP13_16C	0.4291	0.002985	0.4261	0.02252	6	3	26.76	245
Col_2C vs. 35S::UBP13_32C	0.4291	0.001132	0.4279	0.02252	6	3	26.87	245
Col_4C vs. Col_8C	0.5171	0.04862	0.4685	0.01839	6	6	36.03	245
Col_4C vs. Col_16C	0.5171	0.004213	0.5129	0.01839	6	6	39.44	245
Col_4C vs. Col_32C	0.5171	0.0009827	0.5161	0.01839	6	6	39.69	245
Col_4C vs. 35S::UBP13_2C	0.5171	0.6131	-0.09596	0.02252	6	3	6.026	245
Col_4C vs. 35S::UBP13_4C	0.5171	0.3537	0.1635	0.02252	6	3	10.26	245
Col_4C vs. 35S::UBP13_8C	0.5171	0.02915	0.488	0.02252	6	3	30.64	245
Col_4C vs. 35S::UBP13_16C	0.5171	0.002985	0.5141	0.02252	6	3	32.28	245
Col_4C vs. 35S::UBP13_32C	0.5171	0.001132	0.516	0.02252	6	3	32.4	245
Col_8C vs. Col_16C	0.04862	0.004213	0.04441	0.01839	6	6	3.415	245
Col_8C vs. Col_32C	0.04862	0.0009827	0.04764	0.01839	6	6	3.664	245
Col_8C vs. 35S::UBP13_2C	0.04862	0.6131	-0.5645	0.02252	6	3	35.44	245
Col_8C vs. 35S::UBP13_4C	0.04862	0.3537	-0.305	0.02252	6	3	19.15	245
Col_8C vs. 35S::UBP13_8C	0.04862	0.02915	0.01947	0.02252	6	3	1.223	245
Col_8C vs. 35S::UBP13_16C	0.04862	0.002985	0.04564	0.02252	6	3	2.866	245
Col_8C vs. 35S::UBP13_32C	0.04862	0.001132	0.04749	0.02252	6	3	2.982	245
Col_16C vs. Col_32C	0.004213	0.0009827	0.00323	0.01839	6	6	0.2484	245
Col_16C vs. 35S::UBP13_2C	0.004213	0.6131	-0.6089	0.02252	6	3	38.23	245
Col_16C vs. 35S::UBP13_4C	0.004213	0.3537	-0.3494	0.02252	6	3	21.94	245
Col_16C vs. 35S::UBP13_8C	0.004213	0.02915	-0.02494	0.02252	6	3	1.566	245
Col_16C vs. 35S::UBP13_16C	0.004213	0.002985	0.001228	0.02252	6	3	0.0771	245
Col_16C vs. 35S::UBP13_32C	0.004213	0.001132	0.00308	0.02252	6	3	0.1934	245
Col_32C vs. 35S::UBP13_2C	0.0009827	0.6131	-0.6121	0.02252	6	3	38.44	245
Col_32C vs. 35S::UBP13_4C	0.0009827	0.3537	-0.3527	0.02252	6	3	22.15	245
Col_32C vs. 35S::UBP13_8C	0.0009827	0.02915	-0.02817	0.02252	6	3	1.769	245
Col_32C vs. 35S::UBP13_16C	0.0009827	0.002985	-0.002002	0.02252	6	3	0.1257	245
Col_32C vs. 35S::UBP13_32C	0.0009827	0.001132	-0.0001497	0.02252	6	3	0.009398	245
35S::UBP13_2C vs. 35S::UBP13_4C	0.6131	0.3537	0.2594	0.02601	3	3	14.11	245
35S::UBP13_2C vs. 35S::UBP13_8C	0.6131	0.02915	0.5839	0.02601	3	3	31.75	245
35S::UBP13_2C vs. 35S::UBP13_16C	0.6131	0.002985	0.6101	0.02601	3	3	33.18	245
35S::UBP13_2C vs. 35S::UBP13_32C	0.6131	0.001132	0.6119	0.02601	3	3	33.28	245
35S::UBP13_4C vs. 35S::UBP13_8C	0.3537	0.02915	0.3245	0.02601	3	3	17.65	245
35S::UBP13_4C vs. 35S::UBP13_16C	0.3537	0.002985	0.3507	0.02601	3	3	19.07	245
35S::UBP13_4C vs. 35S::UBP13_32C	0.3537	0.001132	0.3525	0.02601	3	3	19.17	245
35S::UBP13_8C vs. 35S::UBP13_16C	0.02915	0.002985	0.02616	0.02601	3	3	1.423	245
35S::UBP13_8C vs. 35S::UBP13_32C	0.02915	0.001132	0.02802	0.02601	3	3	1.524	245
35S::UBP13_16C vs. 35S::UBP13_32C	0.002985	0.001132	0.001853	0.02601	3	3	0.1007	245
D15
Col_2C vs. Col_4C	0.2528	0.3684	-0.1155	0.01839	6	6	8.886	245
Col_2C vs. Col_8C	0.2528	0.3497	-0.09682	0.01839	6	6	7.446	245
Col_2C vs. Col_16C	0.2528	0.02742	0.2254	0.01839	6	6	17.34	245
Col_2C vs. Col_32C	0.2528	0.001665	0.2512	0.01839	6	6	19.32	245
Col_2C vs. 35S::UBP13_2C	0.2528	0.3419	-0.08907	0.02252	6	3	5.593	245
Col_2C vs. 35S::UBP13_4C	0.2528	0.423	-0.1701	0.02252	6	3	10.68	245
Col_2C vs. 35S::UBP13_8C	0.2528	0.2193	0.03352	0.02252	6	3	2.105	245
Col_2C vs. 35S::UBP13_16C	0.2528	0.0148	0.2381	0.02252	6	3	14.95	245
Col_2C vs. 35S::UBP13_32C	0.2528	0.0009877	0.2519	0.02252	6	3	15.82	245
Col_4C vs. Col_8C	0.3684	0.3497	0.01872	0.01839	6	6	1.439	245
Col_4C vs. Col_16C	0.3684	0.02742	0.341	0.01839	6	6	26.22	245
Col_4C vs. Col_32C	0.3684	0.001665	0.3667	0.01839	6	6	28.2	245
Col_4C vs. 35S::UBP13_2C	0.3684	0.3419	0.02647	0.02252	6	3	1.662	245
Col_4C vs. 35S::UBP13_4C	0.3684	0.423	-0.05458	0.02252	6	3	3.427	245
Col_4C vs. 35S::UBP13_8C	0.3684	0.2193	0.1491	0.02252	6	3	9.36	245
Col_4C vs. 35S::UBP13_16C	0.3684	0.0148	0.3536	0.02252	6	3	22.2	245
Col_4C vs. 35S::UBP13_32C	0.3684	0.0009877	0.3674	0.02252	6	3	23.07	245
Col_8C vs. Col_16C	0.3497	0.02742	0.3222	0.01839	6	6	24.78	245
Col_8C vs. Col_32C	0.3497	0.001665	0.348	0.01839	6	6	26.76	245
Col_8C vs. 35S::UBP13_2C	0.3497	0.3419	0.007754	0.02252	6	3	0.4869	245
Col_8C vs. 35S::UBP13_4C	0.3497	0.423	-0.07329	0.02252	6	3	4.602	245
Col_8C vs. 35S::UBP13_8C	0.3497	0.2193	0.1303	0.02252	6	3	8.184	245
Col_8C vs. 35S::UBP13_16C	0.3497	0.0148	0.3349	0.02252	6	3	21.03	245
Col_8C vs. 35S::UBP13_32C	0.3497	0.0009877	0.3487	0.02252	6	3	21.89	245
Col_16C vs. Col_32C	0.02742	0.001665	0.02576	0.01839	6	6	1.981	245
Col_16C vs. 35S::UBP13_2C	0.02742	0.3419	-0.3145	0.02252	6	3	19.75	245
Col_16C vs. 35S::UBP13_4C	0.02742	0.423	-0.3955	0.02252	6	3	24.84	245
Col_16C vs. 35S::UBP13_8C	0.02742	0.2193	-0.1919	0.02252	6	3	12.05	245
Col_16C vs. 35S::UBP13_16C	0.02742	0.0148	0.01263	0.02252	6	3	0.793	245
Col_16C vs. 35S::UBP13_32C	0.02742	0.0009877	0.02644	0.02252	6	3	1.66	245
Col_32C vs. 35S::UBP13_2C	0.001665	0.3419	-0.3403	0.02252	6	3	21.37	245
Col_32C vs. 35S::UBP13_4C	0.001665	0.423	-0.4213	0.02252	6	3	26.45	245
Col_32C vs. 35S::UBP13_8C	0.001665	0.2193	-0.2177	0.02252	6	3	13.67	245
Col_32C vs. 35S::UBP13_16C	0.001665	0.0148	-0.01313	0.02252	6	3	0.8245	245
Col_32C vs. 35S::UBP13_32C	0.001665	0.0009877	0.0006773	0.02252	6	3	0.04253	245
35S::UBP13_2C vs. 35S::UBP13_4C	0.3419	0.423	-0.08105	0.02601	3	3	4.407	245
35S::UBP13_2C vs. 35S::UBP13_8C	0.3419	0.2193	0.1226	0.02601	3	3	6.666	245
35S::UBP13_2C vs. 35S::UBP13_16C	0.3419	0.0148	0.3271	0.02601	3	3	17.79	245
35S::UBP13_2C vs. 35S::UBP13_32C	0.3419	0.0009877	0.3409	0.02601	3	3	18.54	245
35S::UBP13_4C vs. 35S::UBP13_8C	0.423	0.2193	0.2036	0.02601	3	3	11.07	245
35S::UBP13_4C vs. 35S::UBP13_16C	0.423	0.0148	0.4082	0.02601	3	3	22.2	245
35S::UBP13_4C vs. 35S::UBP13_32C	0.423	0.0009877	0.422	0.02601	3	3	22.95	245
35S::UBP13_8C vs. 35S::UBP13_16C	0.2193	0.0148	0.2045	0.02601	3	3	11.12	245
35S::UBP13_8C vs. 35S::UBP13_32C	0.2193	0.0009877	0.2183	0.02601	3	3	11.87	245
35S::UBP13_16C vs. 35S::UBP13_32C	0.0148	0.0009877	0.01381	0.02601	3	3	0.7509	245
D18
Col_2C vs. Col_4C	0.226	0.3104	-0.08441	0.01839	6	6	6.491	245
Col_2C vs. Col_8C	0.226	0.4213	-0.1952	0.01839	6	6	15.02	245
Col_2C vs. Col_16C	0.226	0.03997	0.186	0.01839	6	6	14.31	245
Col_2C vs. Col_32C	0.226	0.002329	0.2237	0.01839	6	6	17.2	245
Col_2C vs. 35S::UBP13_2C	0.226	0.291	-0.06498	0.02252	6	3	4.081	245
Col_2C vs. 35S::UBP13_4C	0.226	0.3599	-0.1338	0.02252	6	3	8.405	245
Col_2C vs. 35S::UBP13_8C	0.226	0.3276	-0.1016	0.02252	6	3	6.379	245
Col_2C vs. 35S::UBP13_16C	0.226	0.02052	0.2055	0.02252	6	3	12.9	245
Col_2C vs. 35S::UBP13_32C	0.226	0.001009	0.225	0.02252	6	3	14.13	245
Col_4C vs. Col_8C	0.3104	0.4213	-0.1108	0.01839	6	6	8.524	245
Col_4C vs. Col_16C	0.3104	0.03997	0.2705	0.01839	6	6	20.8	245
Col_4C vs. Col_32C	0.3104	0.002329	0.3081	0.01839	6	6	23.69	245
Col_4C vs. 35S::UBP13_2C	0.3104	0.291	0.01942	0.02252	6	3	1.219	245
Col_4C vs. 35S::UBP13_4C	0.3104	0.3599	-0.04944	0.02252	6	3	3.104	245
Col_4C vs. 35S::UBP13_8C	0.3104	0.3276	-0.01719	0.02252	6	3	1.079	245
Col_4C vs. 35S::UBP13_16C	0.3104	0.02052	0.2899	0.02252	6	3	18.2	245
Col_4C vs. 35S::UBP13_32C	0.3104	0.001009	0.3094	0.02252	6	3	19.43	245
Col_8C vs. Col_16C	0.4213	0.03997	0.3813	0.01839	6	6	29.32	245
Col_8C vs. Col_32C	0.4213	0.002329	0.4189	0.01839	6	6	32.22	245
Col_8C vs. 35S::UBP13_2C	0.4213	0.291	0.1303	0.02252	6	3	8.18	245
Col_8C vs. 35S::UBP13_4C	0.4213	0.3599	0.0614	0.02252	6	3	3.856	245
Col_8C vs. 35S::UBP13_8C	0.4213	0.3276	0.09366	0.02252	6	3	5.881	245
Col_8C vs. 35S::UBP13_16C	0.4213	0.02052	0.4007	0.02252	6	3	25.16	245
Col_8C vs. 35S::UBP13_32C	0.4213	0.001009	0.4203	0.02252	6	3	26.39	245
Col_16C vs. Col_32C	0.03997	0.002329	0.03764	0.01839	6	6	2.895	245
Col_16C vs. 35S::UBP13_2C	0.03997	0.291	-0.251	0.02252	6	3	15.76	245
Col_16C vs. 35S::UBP13_4C	0.03997	0.3599	-0.3199	0.02252	6	3	20.09	245
Col_16C vs. 35S::UBP13_8C	0.03997	0.3276	-0.2876	0.02252	6	3	18.06	245
Col_16C vs. 35S::UBP13_16C	0.03997	0.02052	0.01945	0.02252	6	3	1.221	245
Col_16C vs. 35S::UBP13_32C	0.03997	0.001009	0.03896	0.02252	6	3	2.446	245
Col_32C vs. 35S::UBP13_2C	0.002329	0.291	-0.2887	0.02252	6	3	18.13	245
Col_32C vs. 35S::UBP13_4C	0.002329	0.3599	-0.3575	0.02252	6	3	22.45	245
Col_32C vs. 35S::UBP13_8C	0.002329	0.3276	-0.3253	0.02252	6	3	20.43	245
Col_32C vs. 35S::UBP13_16C	0.002329	0.02052	-0.01819	0.02252	6	3	1.142	245
Col_32C vs. 35S::UBP13_32C	0.002329	0.001009	0.00132	0.02252	6	3	0.0829	245
35S::UBP13_2C vs. 35S::UBP13_4C	0.291	0.3599	-0.06886	0.02601	3	3	3.745	245
35S::UBP13_2C vs. 35S::UBP13_8C	0.291	0.3276	-0.03661	0.02601	3	3	1.991	245
35S::UBP13_2C vs. 35S::UBP13_16C	0.291	0.02052	0.2705	0.02601	3	3	14.71	245
35S::UBP13_2C vs. 35S::UBP13_32C	0.291	0.001009	0.29	0.02601	3	3	15.77	245
35S::UBP13_4C vs. 35S::UBP13_8C	0.3599	0.3276	0.03225	0.02601	3	3	1.754	245
35S::UBP13_4C vs. 35S::UBP13_16C	0.3599	0.02052	0.3393	0.02601	3	3	18.45	245
35S::UBP13_4C vs. 35S::UBP13_32C	0.3599	0.001009	0.3589	0.02601	3	3	19.51	245
35S::UBP13_8C vs. 35S::UBP13_16C	0.3276	0.02052	0.3071	0.02601	3	3	16.7	245
35S::UBP13_8C vs. 35S::UBP13_32C	0.3276	0.001009	0.3266	0.02601	3	3	17.76	245
35S::UBP13_16C vs. 35S::UBP13_32C	0.02052	0.001009	0.01951	0.02601	3	3	1.061	245
D21
Col_2C vs. Col_4C	0.2213	0.2634	-0.04206	0.01839	6	6	3.235	245
Col_2C vs. Col_8C	0.2213	0.4215	-0.2002	0.01839	6	6	15.39	245
Col_2C vs. Col_16C	0.2213	0.08922	0.1321	0.01839	6	6	10.16	245
Col_2C vs. Col_32C	0.2213	0.004523	0.2168	0.01839	6	6	16.67	245
Col_2C vs. 35S::UBP13_2C	0.2213	0.2901	-0.06878	0.02252	6	3	4.319	245
Col_2C vs. 35S::UBP13_4C	0.2213	0.3018	-0.08049	0.02252	6	3	5.054	245
Col_2C vs. 35S::UBP13_8C	0.2213	0.3448	-0.1235	0.02252	6	3	7.753	245
Col_2C vs. 35S::UBP13_16C	0.2213	0.06038	0.161	0.02252	6	3	10.11	245
Col_2C vs. 35S::UBP13_32C	0.2213	0.002863	0.2185	0.02252	6	3	13.72	245
Col_4C vs. Col_8C	0.2634	0.4215	-0.1581	0.01839	6	6	12.16	245
Col_4C vs. Col_16C	0.2634	0.08922	0.1742	0.01839	6	6	13.4	245
Col_4C vs. Col_32C	0.2634	0.004523	0.2589	0.01839	6	6	19.91	245
Col_4C vs. 35S::UBP13_2C	0.2634	0.2901	-0.02672	0.02252	6	3	1.678	245
Col_4C vs. 35S::UBP13_4C	0.2634	0.3018	-0.03843	0.02252	6	3	2.413	245
Col_4C vs. 35S::UBP13_8C	0.2634	0.3448	-0.0814	0.02252	6	3	5.112	245
Col_4C vs. 35S::UBP13_16C	0.2634	0.06038	0.203	0.02252	6	3	12.75	245
Col_4C vs. 35S::UBP13_32C	0.2634	0.002863	0.2605	0.02252	6	3	16.36	245
Col_8C vs. Col_16C	0.4215	0.08922	0.3323	0.01839	6	6	25.56	245
Col_8C vs. Col_32C	0.4215	0.004523	0.417	0.01839	6	6	32.07	245
Col_8C vs. 35S::UBP13_2C	0.4215	0.2901	0.1314	0.02252	6	3	8.251	245
Col_8C vs. 35S::UBP13_4C	0.4215	0.3018	0.1197	0.02252	6	3	7.515	245
Col_8C vs. 35S::UBP13_8C	0.4215	0.3448	0.07671	0.02252	6	3	4.817	245
Col_8C vs. 35S::UBP13_16C	0.4215	0.06038	0.3611	0.02252	6	3	22.68	245
Col_8C vs. 35S::UBP13_32C	0.4215	0.002863	0.4187	0.02252	6	3	26.29	245
Col_16C vs. Col_32C	0.08922	0.004523	0.08469	0.01839	6	6	6.513	245
Col_16C vs. 35S::UBP13_2C	0.08922	0.2901	-0.2009	0.02252	6	3	12.62	245
Col_16C vs. 35S::UBP13_4C	0.08922	0.3018	-0.2126	0.02252	6	3	13.35	245
Col_16C vs. 35S::UBP13_8C	0.08922	0.3448	-0.2556	0.02252	6	3	16.05	245
Col_16C vs. 35S::UBP13_16C	0.08922	0.06038	0.02884	0.02252	6	3	1.811	245
Col_16C vs. 35S::UBP13_32C	0.08922	0.002863	0.08635	0.02252	6	3	5.422	245
Col_32C vs. 35S::UBP13_2C	0.004523	0.2901	-0.2856	0.02252	6	3	17.93	245
Col_32C vs. 35S::UBP13_4C	0.004523	0.3018	-0.2973	0.02252	6	3	18.67	245
Col_32C vs. 35S::UBP13_8C	0.004523	0.3448	-0.3403	0.02252	6	3	21.37	245
Col_32C vs. 35S::UBP13_16C	0.004523	0.06038	-0.05585	0.02252	6	3	3.507	245
Col_32C vs. 35S::UBP13_32C	0.004523	0.002863	0.00166	0.02252	6	3	0.1042	245
35S::UBP13_2C vs. 35S::UBP13_4C	0.2901	0.3018	-0.01171	0.02601	3	3	0.6369	245
35S::UBP13_2C vs. 35S::UBP13_8C	0.2901	0.3448	-0.05469	0.02601	3	3	2.974	245
35S::UBP13_2C vs. 35S::UBP13_16C	0.2901	0.06038	0.2297	0.02601	3	3	12.49	245
35S::UBP13_2C vs. 35S::UBP13_32C	0.2901	0.002863	0.2873	0.02601	3	3	15.62	245
35S::UBP13_4C vs. 35S::UBP13_8C	0.3018	0.3448	-0.04298	0.02601	3	3	2.337	245
35S::UBP13_4C vs. 35S::UBP13_16C	0.3018	0.06038	0.2415	0.02601	3	3	13.13	245
35S::UBP13_4C vs. 35S::UBP13_32C	0.3018	0.002863	0.299	0.02601	3	3	16.26	245
35S::UBP13_8C vs. 35S::UBP13_16C	0.3448	0.06038	0.2844	0.02601	3	3	15.47	245
35S::UBP13_8C vs. 35S::UBP13_32C	0.3448	0.002863	0.3419	0.02601	3	3	18.6	245
35S::UBP13_16C vs. 35S::UBP13_32C	0.06038	0.002863	0.05751	0.02601	3	3	3.128	245
D24
Col_2C vs. Col_4C	0.2176	0.2826	-0.06499	0.01839	6	6	4.998	245
Col_2C vs. Col_8C	0.2176	0.4524	-0.2347	0.01839	6	6	18.05	245
Col_2C vs. Col_16C	0.2176	0.04409	0.1736	0.01839	6	6	13.35	245
Col_2C vs. Col_32C	0.2176	0.00323	0.2144	0.01839	6	6	16.49	245
Col_2C vs. 35S::UBP13_2C	0.2176	0.2443	-0.02662	0.02252	6	3	1.672	245
Col_2C vs. 35S::UBP13_4C	0.2176	0.282	-0.0643	0.02252	6	3	4.038	245
Col_2C vs. 35S::UBP13_8C	0.2176	0.4196	-0.2019	0.02252	6	3	12.68	245
Col_2C vs. 35S::UBP13_16C	0.2176	0.05241	0.1652	0.02252	6	3	10.38	245
Col_2C vs. 35S::UBP13_32C	0.2176	0.001812	0.2158	0.02252	6	3	13.55	245
Col_4C vs. Col_8C	0.2826	0.4524	-0.1698	0.01839	6	6	13.06	245
Col_4C vs. Col_16C	0.2826	0.04409	0.2385	0.01839	6	6	18.35	245
Col_4C vs. Col_32C	0.2826	0.00323	0.2794	0.01839	6	6	21.49	245
Col_4C vs. 35S::UBP13_2C	0.2826	0.2443	0.03837	0.02252	6	3	2.409	245
Col_4C vs. 35S::UBP13_4C	0.2826	0.282	0.0006873	0.02252	6	3	0.04316	245
Col_4C vs. 35S::UBP13_8C	0.2826	0.4196	-0.1369	0.02252	6	3	8.598	245
Col_4C vs. 35S::UBP13_16C	0.2826	0.05241	0.2302	0.02252	6	3	14.46	245
Col_4C vs. 35S::UBP13_32C	0.2826	0.001812	0.2808	0.02252	6	3	17.63	245
Col_8C vs. Col_16C	0.4524	0.04409	0.4083	0.01839	6	6	31.4	245
Col_8C vs. Col_32C	0.4524	0.00323	0.4492	0.01839	6	6	34.54	245
Col_8C vs. 35S::UBP13_2C	0.4524	0.2443	0.2081	0.02252	6	3	13.07	245
Col_8C vs. 35S::UBP13_4C	0.4524	0.282	0.1704	0.02252	6	3	10.7	245
Col_8C vs. 35S::UBP13_8C	0.4524	0.4196	0.03283	0.02252	6	3	2.062	245
Col_8C vs. 35S::UBP13_16C	0.4524	0.05241	0.4	0.02252	6	3	25.12	245
Col_8C vs. 35S::UBP13_32C	0.4524	0.001812	0.4506	0.02252	6	3	28.29	245
Col_16C vs. Col_32C	0.04409	0.00323	0.04086	0.01839	6	6	3.142	245
Col_16C vs. 35S::UBP13_2C	0.04409	0.2443	-0.2002	0.02252	6	3	12.57	245
Col_16C vs. 35S::UBP13_4C	0.04409	0.282	-0.2379	0.02252	6	3	14.94	245
Col_16C vs. 35S::UBP13_8C	0.04409	0.4196	-0.3755	0.02252	6	3	23.58	245
Col_16C vs. 35S::UBP13_16C	0.04409	0.05241	-0.008317	0.02252	6	3	0.5222	245
Col_16C vs. 35S::UBP13_32C	0.04409	0.001812	0.04228	0.02252	6	3	2.655	245
Col_32C vs. 35S::UBP13_2C	0.00323	0.2443	-0.241	0.02252	6	3	15.14	245
Col_32C vs. 35S::UBP13_4C	0.00323	0.282	-0.2787	0.02252	6	3	17.5	245
Col_32C vs. 35S::UBP13_8C	0.00323	0.4196	-0.4163	0.02252	6	3	26.14	245
Col_32C vs. 35S::UBP13_16C	0.00323	0.05241	-0.04918	0.02252	6	3	3.088	245
Col_32C vs. 35S::UBP13_32C	0.00323	0.001812	0.001418	0.02252	6	3	0.08904	245
35S::UBP13_2C vs. 35S::UBP13_4C	0.2443	0.282	-0.03768	0.02601	3	3	2.049	245
35S::UBP13_2C vs. 35S::UBP13_8C	0.2443	0.4196	-0.1753	0.02601	3	3	9.533	245
35S::UBP13_2C vs. 35S::UBP13_16C	0.2443	0.05241	0.1919	0.02601	3	3	10.43	245
35S::UBP13_2C vs. 35S::UBP13_32C	0.2443	0.001812	0.2425	0.02601	3	3	13.18	245
35S::UBP13_4C vs. 35S::UBP13_8C	0.282	0.4196	-0.1376	0.02601	3	3	7.483	245
35S::UBP13_4C vs. 35S::UBP13_16C	0.282	0.05241	0.2295	0.02601	3	3	12.48	245
35S::UBP13_4C vs. 35S::UBP13_32C	0.282	0.001812	0.2801	0.02601	3	3	15.23	245
35S::UBP13_8C vs. 35S::UBP13_16C	0.4196	0.05241	0.3672	0.02601	3	3	19.97	245
35S::UBP13_8C vs. 35S::UBP13_32C	0.4196	0.001812	0.4178	0.02601	3	3	22.72	245
35S::UBP13_16C vs. 35S::UBP13_32C	0.05241	0.001812	0.0506	0.02601	3	3	2.751	245
D27
Col_2C vs. Col_4C	0.2011	0.2639	-0.06274	0.01839	6	6	4.825	245
Col_2C vs. Col_8C	0.2011	0.4642	-0.2631	0.01839	6	6	20.23	245
Col_2C vs. Col_16C	0.2011	0.06767	0.1335	0.01839	6	6	10.26	245
Col_2C vs. Col_32C	0.2011	0.00312	0.198	0.01839	6	6	15.23	245
Col_2C vs. 35S::UBP13_2C	0.2011	0.2572	-0.05604	0.02252	6	3	3.519	245
Col_2C vs. 35S::UBP13_4C	0.2011	0.25	-0.0489	0.02252	6	3	3.07	245
Col_2C vs. 35S::UBP13_8C	0.2011	0.3497	-0.1486	0.02252	6	3	9.328	245
Col_2C vs. 35S::UBP13_16C	0.2011	0.136	0.06516	0.02252	6	3	4.092	245
Col_2C vs. 35S::UBP13_32C	0.2011	0.007156	0.194	0.02252	6	3	12.18	245
Col_4C vs. Col_8C	0.2639	0.4642	-0.2004	0.01839	6	6	15.41	245
Col_4C vs. Col_16C	0.2639	0.06767	0.1962	0.01839	6	6	15.09	245
Col_4C vs. Col_32C	0.2639	0.00312	0.2607	0.01839	6	6	20.05	245
Col_4C vs. 35S::UBP13_2C	0.2639	0.2572	0.006693	0.02252	6	3	0.4203	245
Col_4C vs. 35S::UBP13_4C	0.2639	0.25	0.01384	0.02252	6	3	0.8691	245
Col_4C vs. 35S::UBP13_8C	0.2639	0.3497	-0.08582	0.02252	6	3	5.389	245
Col_4C vs. 35S::UBP13_16C	0.2639	0.136	0.1279	0.02252	6	3	8.031	245
Col_4C vs. 35S::UBP13_32C	0.2639	0.007156	0.2567	0.02252	6	3	16.12	245
Col_8C vs. Col_16C	0.4642	0.06767	0.3965	0.01839	6	6	30.5	245
Col_8C vs. Col_32C	0.4642	0.00312	0.4611	0.01839	6	6	35.46	245
Col_8C vs. 35S::UBP13_2C	0.4642	0.2572	0.207	0.02252	6	3	13	245
Col_8C vs. 35S::UBP13_4C	0.4642	0.25	0.2142	0.02252	6	3	13.45	245
Col_8C vs. 35S::UBP13_8C	0.4642	0.3497	0.1145	0.02252	6	3	7.192	245
Col_8C vs. 35S::UBP13_16C	0.4642	0.136	0.3283	0.02252	6	3	20.61	245
Col_8C vs. 35S::UBP13_32C	0.4642	0.007156	0.4571	0.02252	6	3	28.7	245
Col_16C vs. Col_32C	0.06767	0.00312	0.06455	0.01839	6	6	4.964	245
Col_16C vs. 35S::UBP13_2C	0.06767	0.2572	-0.1895	0.02252	6	3	11.9	245
Col_16C vs. 35S::UBP13_4C	0.06767	0.25	-0.1824	0.02252	6	3	11.45	245
Col_16C vs. 35S::UBP13_8C	0.06767	0.3497	-0.282	0.02252	6	3	17.71	245
Col_16C vs. 35S::UBP13_16C	0.06767	0.136	-0.06829	0.02252	6	3	4.288	245
Col_16C vs. 35S::UBP13_32C	0.06767	0.007156	0.06052	0.02252	6	3	3.8	245
Col_32C vs. 35S::UBP13_2C	0.00312	0.2572	-0.2541	0.02252	6	3	15.95	245
Col_32C vs. 35S::UBP13_4C	0.00312	0.25	-0.2469	0.02252	6	3	15.5	245
Col_32C vs. 35S::UBP13_8C	0.00312	0.3497	-0.3466	0.02252	6	3	21.76	245
Col_32C vs. 35S::UBP13_16C	0.00312	0.136	-0.1328	0.02252	6	3	8.342	245
Col_32C vs. 35S::UBP13_32C	0.00312	0.007156	-0.004036	0.02252	6	3	0.2535	245
35S::UBP13_2C vs. 35S::UBP13_4C	0.2572	0.25	0.007148	0.02601	3	3	0.3887	245
35S::UBP13_2C vs. 35S::UBP13_8C	0.2572	0.3497	-0.09252	0.02601	3	3	5.031	245
35S::UBP13_2C vs. 35S::UBP13_16C	0.2572	0.136	0.1212	0.02601	3	3	6.591	245
35S::UBP13_2C vs. 35S::UBP13_32C	0.2572	0.007156	0.25	0.02601	3	3	13.6	245
35S::UBP13_4C vs. 35S::UBP13_8C	0.25	0.3497	-0.09966	0.02601	3	3	5.42	245
35S::UBP13_4C vs. 35S::UBP13_16C	0.25	0.136	0.1141	0.02601	3	3	6.202	245
35S::UBP13_4C vs. 35S::UBP13_32C	0.25	0.007156	0.2429	0.02601	3	3	13.21	245
35S::UBP13_8C vs. 35S::UBP13_16C	0.3497	0.136	0.2137	0.02601	3	3	11.62	245
35S::UBP13_8C vs. 35S::UBP13_32C	0.3497	0.007156	0.3425	0.02601	3	3	18.63	245
35S::UBP13_16C vs. 35S::UBP13_32C	0.136	0.007156	0.1288	0.02601	3	3	7.005	245
[truncated: 11 more columns]

## Sheet: F3B-C Gene expression levels
Relative expression levels D9															Relative expression levels D12
		Col-0			35S::UBP12_3.1			Col-0			35S::UBP13_1.1						Col-0			35S::UBP12_3.1			Col-0			35S::UBP13_1.1
		R1	R2	R3	R1	R2	R3	R1	R2	R3	R1	R2	R3				R1	R2	R3	R1	R2	R3	R1	R2	R3	R1	R2	R3
	AN3	0.738	0.864	1	0.727	0.534	0.67	0.745	0.588	0.612	1	1	0.852			AN3	0.0564	0.0682	0.0509	0.123	0.108	0.296	0.0896	0.0894	0.0609	0.241	0.257	0.263
	CYCB1;1	0.851	0.855	1	1	0.839	0.806	0.768	0.917	0.738	0.726	1	0.591			CYCB1;1	0.434	0.413	0.344	0.435	0.447	0.783	0.424	0.532	0.422	0.578	0.892	0.725
	ANT	0.899	0.72	0.549	0.666	0.454	1	0.839	0.526	0.63	1	1	0.878			ANT	0.325	0.316	0.594	0.387	0.266	0.598	0.471	0.283	0.347	0.507	0.441	0.591
	GRF5	0.646		0.568	0.499	0.401	0.568	0.484	0.42	0.464	1	1	1			GRF5	0.127	0.217	0.15	0.312	0.252	0.291	0.154	0.132	0.106	0.328	0.285	0.365
	KLUH	0.307	0.398	0.533	0.452	0.206	0.276	0.249	0.297	0.183	1	1	1			KLUH	0.0026	0.00227			0.00352	0.0213	0.00233	0.0532		0.00402	0.0273	0.0334
		35S::UBP12_3.1		35S::UBP13_1.1													35S::UBP12_3.1		35S::UBP13_1.1
		Mean	SEM	Mean	SEM												Mean	SEM	Mean	SEM
	AN3	-0.150649	0.103709	0.254453	0.123497											AN3	1.53731	0.906368	2.66394	0.372857
	ANT	0.0184963	0.246724	0.382657	0.137595											ANT	0.0710616	0.282907	0.317637	0.199004
	CYCB1;1	0.0313901	0.0845805	-0.09651	0.146729											CYCB1;1	0.296224	0.276606	0.708836	0.233525
	GRF5	-0.0524141	0.119509	0.936483	0.151276											GRF5	0.930023	0.235624	1.20767	0.280366
	KLUH	-0.0503305	0.266404	2.05033	0.467061											KLUH	-0.178146	0.907981	0.428698	1.33991
Statistical analysis D9															Statistical analysis D12
Table Analyzed	Row stats of Day 9 Proliferation genes														Table Analyzed	Row stats of Day 12 Proliferation genes
Two-way ANOVA	Ordinary														Two-way ANOVA	Ordinary
Alpha	0.05														Alpha	0.05
Source of Variation	% of total variation	P value	P value summary	Significant?											Source of Variation	% of total variation	P value	P value summary	Significant?
Interaction	22.09	<0,0001	****	Yes											Interaction	3.684	0.1632	ns	No
Row Factor	16.64	<0,0001	****	Yes											Row Factor	72.23	<0,0001	****	Yes
Column Factor	31.31	<0,0001	****	Yes											Column Factor	9.569	<0,0001	****	Yes
ANOVA table	SS (Type III)	DF	MS	F (DFn, DFd)	P value										ANOVA table	SS (Type III)	DF	MS	F (DFn, DFd)	P value
Interaction	0.7832	8	0.0979	F (8, 44) = 5,803	P<0,0001										Interaction	0.09655	8	0.01207	F (8, 42) = 1,570	P=0,1632
Row Factor	0.59	4	0.1475	F (4, 44) = 8,743	P<0,0001										Row Factor	1.893	4	0.4733	F (4, 42) = 61,56	P<0,0001
Column Factor	1.11	2	0.5551	F (2, 44) = 32,91	P<0,0001										Column Factor	0.2508	2	0.1254	F (2, 42) = 16,31	P<0,0001
Residual	0.7423	44	0.01687												Residual	0.3229	42	0.007688
Within each row, compare columns (simple effects within rows)															Within each row, compare columns (simple effects within rows)
Number of families	5														Number of families	5
Number of comparisons per family	2														Number of comparisons per family	2
Alpha	0.05														Alpha	0.05
Dunnett's multiple comparisons test	Predicted (LS) mean diff,	95,00% CI of diff,	Significant?	Summary	Adjusted P Value										Dunnett's multiple comparisons test	Predicted (LS) mean diff,	95,00% CI of diff,	Significant?	Summary	Adjusted P Value
AN3															AN3
Col-0 vs. 35S::UBP12	0.1142	-0,09722 to 0,3256	No	ns	0.3782										Col-0 vs. 35S::UBP12	-0.1064	-0,2494 to 0,03650	No	ns	0.171
Col-0 vs. 35S::UBP13	-0.1928	-0,4042 to 0,01855	No	ns	0.0785										Col-0 vs. 35S::UBP13	-0.1844	-0,3274 to -0,04150	Yes	**	0.0095
CYCB1;1															CYCB1;1
Col-0 vs. 35S::UBP12	-0.02683	-0,2382 to 0,1846	No	ns	0.9442										Col-0 vs. 35S::UBP12	-0.1268	-0,2698 to 0,01610	No	ns	0.0886
Col-0 vs. 35S::UBP13	0.0825	-0,1289 to 0,2939	No	ns	0.5924										Col-0 vs. 35S::UBP13	-0.3035	-0,4464 to -0,1606	Yes	****	<0,0001
ANT															ANT
Col-0 vs. 35S::UBP12	-0.01283	-0,2242 to 0,1986	No	ns	0.9869										Col-0 vs. 35S::UBP12	-0.02767	-0,1706 to 0,1153	No	ns	0.8755
Col-0 vs. 35S::UBP13	-0.2655	-0,4769 to -0,05411	Yes	*	0.0116										Col-0 vs. 35S::UBP13	-0.1237	-0,2666 to 0,01927	No	ns	0.0987
GRF5															GRF5
Col-0 vs. 35S::UBP12	0.02707	-0,1909 to 0,2451	No	ns	0.9459										Col-0 vs. 35S::UBP12	-0.1373	-0,2803 to 0,005599	No	ns	0.0613
Col-0 vs. 35S::UBP13	-0.4836	-0,7016 to -0,2656	Yes	****	<0,0001										Col-0 vs. 35S::UBP13	-0.1783	-0,3213 to -0,03540	Yes	*	0.0123
KLUH															KLUH
Col-0 vs. 35S::UBP12	0.0165	-0,1949 to 0,2279	No	ns	0.9785										Col-0 vs. 35S::UBP12	0.00269	-0,1721 to 0,1775	No	ns	0.9991
Col-0 vs. 35S::UBP13	-0.6722	-0,8836 to -0,4608	Yes	****	<0,0001										Col-0 vs. 35S::UBP13	-0.006473	-0,1606 to 0,1477	No	ns	0.9936
Test details	Predicted (LS) mean 1	Predicted (LS) mean 2	Predicted (LS) mean diff,	SE of diff,	N1	N2	q	DF							Test details	Predicted (LS) mean 1	Predicted (LS) mean 2	Predicted (LS) mean diff,	SE of diff,	N1	N2	q	DF
AN3															AN3
Col-0 vs. 35S::UBP12	0.7578	0.6437	0.1142	0.09184	6	3	1.243	44							Col-0 vs. 35S::UBP12	0.06923	0.1757	-0.1064	0.062	6	3	1.717	42
Col-0 vs. 35S::UBP13	0.7578	0.9507	-0.1928	0.09184	6	3	2.1	44							Col-0 vs. 35S::UBP13	0.06923	0.2537	-0.1844	0.062	6	3	2.975	42
CYCB1;1															CYCB1;1
Col-0 vs. 35S::UBP12	0.8548	0.8817	-0.02683	0.09184	6	3	0.2922	44							Col-0 vs. 35S::UBP12	0.4282	0.555	-0.1268	0.062	6	3	2.046	42
Col-0 vs. 35S::UBP13	0.8548	0.7723	0.0825	0.09184	6	3	0.8983	44							Col-0 vs. 35S::UBP13	0.4282	0.7317	-0.3035	0.062	6	3	4.895	42
ANT															ANT
Col-0 vs. 35S::UBP12	0.6938	0.7067	-0.01283	0.09184	6	3	0.1397	44							Col-0 vs. 35S::UBP12	0.3893	0.417	-0.02767	0.062	6	3	0.4462	42
Col-0 vs. 35S::UBP13	0.6938	0.9593	-0.2655	0.09184	6	3	2.891	44							Col-0 vs. 35S::UBP13	0.3893	0.513	-0.1237	0.062	6	3	1.995	42
GRF5															GRF5
Col-0 vs. 35S::UBP12	0.5164	0.4893	0.02707	0.09486	5	3	0.2853	44							Col-0 vs. 35S::UBP12	0.1477	0.285	-0.1373	0.062	6	3	2.215	42
Col-0 vs. 35S::UBP13	0.5164	1	-0.4836	0.09486	5	3	5.098	44							Col-0 vs. 35S::UBP13	0.1477	0.326	-0.1783	0.062	6	3	2.876	42
KLUH															KLUH
Col-0 vs. 35S::UBP12	0.3278	0.3113	0.0165	0.09184	6	3	0.1797	44							Col-0 vs. 35S::UBP12	0.0151	0.01241	0.00269	0.07594	4	2	0.03542	42
Col-0 vs. 35S::UBP13	0.3278	1	-0.6722	0.09184	6	3	7.319	44							Col-0 vs. 35S::UBP13	0.0151	0.02157	-0.006473	0.06697	4	3	0.09666	42

## Sheet: F3D Cell area D12
Col-0						35S::UBP12_3.1						35S::UBP13_1.1
Pavement cell ID	Figure	pixels	pixels/µm2	µm2		Pavement cell ID	Figure	pixels	pixels/µm2	µm2		Pavement cell ID	Figure	pixels	pixels/µm2	µm2
1	col_L3.tif	0.22	0.000478734	459.545		1	35S::UBP12_L3.tif	0.024	0.000478734	50.1322		1	35S::UBP13_L3.tif	0.01	0.000478734	20.8884
2	col_L3.tif	0.147	0.000478734	307.06		2	35S::UBP12_L3.tif	0.016	0.000478734	33.4215		2	35S::UBP13_L3.tif	0.016	0.000478734	33.4215
3	col_L3.tif	0.082	0.000478734	171.285		3	35S::UBP12_L3.tif	0.053	0.000478734	110.709		3	35S::UBP13_L3.tif	0.075	0.000478734	156.663
4	col_L3.tif	0.022	0.000478734	45.9545		4	35S::UBP12_L3.tif	0.067	0.000478734	139.952		4	35S::UBP13_L3.tif	0.005	0.000478734	10.4442
5	col_L3.tif	0.025	0.000478734	52.221		5	35S::UBP12_L3.tif	0.062	0.000478734	129.508		5	35S::UBP13_L3.tif	0.015	0.000478734	31.3326
6	col_L3.tif	0.162	0.000478734	338.392		6	35S::UBP12_L3.tif	0.029	0.000478734	60.5764		6	35S::UBP13_L3.tif	0.057	0.000478734	119.064
7	col_L3.tif	0.051	0.000478734	106.531		7	35S::UBP12_L3.tif	0.015	0.000478734	31.3326		7	35S::UBP13_L3.tif	0.027	0.000478734	56.3987
8	col_L3.tif	0.092	0.000478734	192.173		8	35S::UBP12_L3.tif	0.018	0.000478734	37.5991		8	35S::UBP13_L3.tif	0.036	0.000478734	75.1983
9	col_L3.tif	0.022	0.000478734	45.9545		9	35S::UBP12_L3.tif	0.073	0.000478734	152.485		9	35S::UBP13_L3.tif	0.037	0.000478734	77.2871
10	col_L3.tif	0.005	0.000478734	10.4442		10	35S::UBP12_L3.tif	0.016	0.000478734	33.4215		10	35S::UBP13_L3.tif	0.014	0.000478734	29.2438
11	col_L3.tif	0.091	0.000478734	190.085		11	35S::UBP12_L3.tif	0.018	0.000478734	37.5991		11	35S::UBP13_L3.tif	0.02	0.000478734	41.7768
12	col_L3.tif	0.012	0.000478734	25.0661		12	35S::UBP12_L3.tif	0.087	0.000478734	181.729		12	35S::UBP13_L3.tif	0.008	0.000478734	16.7107
13	col_L3.tif	0.006	0.000478734	12.533		13	35S::UBP12_L3.tif	0.017	0.000478734	35.5103		13	35S::UBP13_L3.tif	0.014	0.000478734	29.2438
14	col_L3.tif	0.143	0.000478734	298.704		14	35S::UBP12_L3.tif	0.086	0.000478734	179.64		14	35S::UBP13_L3.tif	0.064	0.000478734	133.686
15	col_L3.tif	0.16	0.000478734	334.215		15	35S::UBP12_L3.tif	0.014	0.000478734	29.2438		15	35S::UBP13_L3.tif	0.017	0.000478734	35.5103
16	col_L3.tif	0.075	0.000478734	156.663		16	35S::UBP12_L3.tif	0.035	0.000478734	73.1094		16	35S::UBP13_L3.tif	0.01	0.000478734	20.8884
17	col_L3.tif	0.022	0.000478734	45.9545		17	35S::UBP12_L3.tif	0.017	0.000478734	35.5103		17	35S::UBP13_L3.tif	0.024	0.000478734	50.1322
18	col_L3.tif	0.107	0.000478734	223.506		18	35S::UBP12_L3.tif	0.068	0.000478734	142.041		18	35S::UBP13_L3.tif	0.014	0.000478734	29.2438
19	col_L3.tif	0.04	0.000478734	83.5536		19	35S::UBP12_L3.tif	0.083	0.000478734	173.374		19	35S::UBP13_L3.tif	0.007	0.000478734	14.6219
20	col_L3.tif	0.02	0.000478734	41.7768		20	35S::UBP12_L3.tif	0.015	0.000478734	31.3326		20	35S::UBP13_L3.tif	0.06	0.000478734	125.33
21	col_L3.tif	0.016	0.000478734	33.4215		21	35S::UBP12_L3.tif	0.058	0.000478734	121.153		21	35S::UBP13_L3.tif	0.024	0.000478734	50.1322
22	col_L3.tif	0.034	0.000478734	71.0206		22	35S::UBP12_L3.tif	0.023	0.000478734	48.0433		22	35S::UBP13_L3.tif	0.043	0.000478734	89.8202
23	col_L3.tif	0.016	0.000478734	33.4215		23	35S::UBP12_L3.tif	0.006	0.000478734	12.533		23	35S::UBP13_L3.tif	0.029	0.000478734	60.5764
24	col_L3.tif	0.025	0.000478734	52.221		24	35S::UBP12_L3.tif	0.007	0.000478734	14.6219		24	35S::UBP13_L3.tif	0.042	0.000478734	87.7313
25	col_L3.tif	0.018	0.000478734	37.5991		25	35S::UBP12_L3.tif	0.042	0.000478734	87.7313		25	35S::UBP13_L3.tif	0.088	0.000478734	183.818
26	col_L3.tif	0.105	0.000478734	219.328		26	35S::UBP12_L3.tif	0.015	0.000478734	31.3326		26	35S::UBP13_L3.tif	0.009	0.000478734	18.7996
27	col_L3.tif	0.05	0.000478734	104.442		27	35S::UBP12_L3.tif	0.015	0.000478734	31.3326		27	35S::UBP13_L3.tif	0.015	0.000478734	31.3326
28	col_L3.tif	0.015	0.000478734	31.3326		28	35S::UBP12_L3.tif	0.058	0.000478734	121.153		28	35S::UBP13_L3.tif	0.033	0.000478734	68.9318
29	col_L3.tif	0.2	0.000478734	417.768		29	35S::UBP12_L3.tif	0.09	0.000478734	187.996		29	35S::UBP13_L3.tif	0.078	0.000478734	162.93
30	col_L3.tif	0.071	0.000478734	148.308		30	35S::UBP12_L3.tif	0.022	0.000478734	45.9545		30	35S::UBP13_L3.tif	0.008	0.000478734	16.7107
31	col_L3.tif	0.095	0.000478734	198.44		31	35S::UBP12_L3.tif	0.053	0.000478734	110.709		31	35S::UBP13_L3.tif	0.032	0.000478734	66.8429
32	col_L3.tif	0.017	0.000478734	35.5103		32	35S::UBP12_L3.tif	0.022	0.000478734	45.9545		32	35S::UBP13_L3.tif	0.051	0.000478734	106.531
33	col_L3.tif	0.082	0.000478734	171.285		33	35S::UBP12_L3.tif	0.024	0.000478734	50.1322		33	35S::UBP13_L3.tif	0.022	0.000478734	45.9545
34	col_L3.tif	0.02	0.000478734	41.7768		34	35S::UBP12_L3.tif	0.032	0.000478734	66.8429		34	35S::UBP13_L3.tif	0.011	0.000478734	22.9773
35	col_L3.tif	0.025	0.000478734	52.221		35	35S::UBP12_L3.tif	0.04	0.000478734	83.5536		35	35S::UBP13_L3.tif	0.008	0.000478734	16.7107
36	col_L3.tif	0.144	0.000478734	300.793		36	35S::UBP12_L3.tif	0.053	0.000478734	110.709		36	35S::UBP13_L3.tif	0.048	0.000478734	100.264
37	col_L3.tif	0.115	0.000478734	240.217		37	35S::UBP12_L3.tif	0.019	0.000478734	39.688		37	35S::UBP13_L3.tif	0.025	0.000478734	52.221
38	col_L3.tif	0.094	0.000478734	196.351		38	35S::UBP12_L3.tif	0.012	0.000478734	25.0661		38	35S::UBP13_L3.tif	0.047	0.000478734	98.1755
39	col_L3.tif	0.083	0.000478734	173.374		39	35S::UBP12_L3.tif	0.053	0.000478734	110.709		39	35S::UBP13_L3.tif	0.01	0.000478734	20.8884
40	col_L3.tif	0.018	0.000478734	37.5991		40	35S::UBP12_L3.tif	0.031	0.000478734	64.7541		40	35S::UBP13_L3.tif	0.008	0.000478734	16.7107
41	col_L3.tif	0.032	0.000478734	66.8429		41	35S::UBP12_L3.tif	0.026	0.000478734	54.3099		41	35S::UBP13_L3.tif	0.035	0.000478734	73.1094
42	col_L3.tif	0.126	0.000478734	263.194		42	35S::UBP12_L3.tif	0.103	0.000478734	215.151		42	35S::UBP13_L3.tif	0.025	0.000478734	52.221
43	col_L3.tif	0.04	0.000478734	83.5536		43	35S::UBP12_L3.tif	0.038	0.000478734	79.376		43	35S::UBP13_L3.tif	0.076	0.000478734	158.752
44	col_L3.tif	0.07	0.000478734	146.219		44	35S::UBP12_L3.tif	0.017	0.000478734	35.5103		44	35S::UBP13_L3.tif	0.013	0.000478734	27.1549
45	col_L3.tif	0.078	0.000478734	162.93		45	35S::UBP12_L3.tif	0.018	0.000478734	37.5991		45	35S::UBP13_L3.tif	0.018	0.000478734	37.5991
46	col_L3.tif	0.112	0.000478734	233.95		46	35S::UBP12_L3.tif	0.017	0.000478734	35.5103		46	35S::UBP13_L3.tif	0.01	0.000478734	20.8884
47	col_L3.tif	0.081	0.000478734	169.196		47	35S::UBP12_L3.tif	0.039	0.000478734	81.4648		47	35S::UBP13_L3.tif	0.016	0.000478734	33.4215
48	col_L3.tif	0.32	0.000478734	668.429		48	35S::UBP12_L3.tif	0.054	0.000478734	112.797		48	35S::UBP13_L3.tif	0.01	0.000478734	20.8884
49	col_L3.tif	0.219	0.000478734	457.456		49	35S::UBP12_L3.tif	0.077	0.000478734	160.841		49	35S::UBP13_L3.tif	0.048	0.000478734	100.264
50	col_L3.tif	0.113	0.000478734	236.039		50	35S::UBP12_L3.tif	0.028	0.000478734	58.4875		50	35S::UBP13_L3.tif	0.013	0.000478734	27.1549
51	col_L3.tif	0.066	0.000478734	137.864		51	35S::UBP12_L3.tif	0.041	0.000478734	85.6425		51	35S::UBP13_L3.tif	0.007	0.000478734	14.6219
52	col_L3.tif	0.026	0.000478734	54.3099		52	35S::UBP12_L3.tif	0.029	0.000478734	60.5764		52	35S::UBP13_L3.tif	0.091	0.000478734	190.085
53	col_L3.tif	0.023	0.000478734	48.0433		53	35S::UBP12_L3.tif	0.017	0.000478734	35.5103		53	35S::UBP13_L3.tif	0.06	0.000478734	125.33
54	col_L3.tif	0.022	0.000478734	45.9545		54	35S::UBP12_L3.tif	0.021	0.000478734	43.8657		54	35S::UBP13_L3.tif	0.015	0.000478734	31.3326
55	col_L3.tif	0.113	0.000478734	236.039		55	35S::UBP12_L3.tif	0.105	0.000478734	219.328		55	35S::UBP13_L3.tif	0.023	0.000478734	48.0433
56	col_L3.tif	0.015	0.000478734	31.3326		56	35S::UBP12_L3.tif	0.007	0.000478734	14.6219		56	35S::UBP13_L3.tif	0.039	0.000478734	81.4648
57	col_L3.tif	0.094	0.000478734	196.351		57	35S::UBP12_L3.tif	0.009	0.000478734	18.7996		57	35S::UBP13_L3.tif	0.043	0.000478734	89.8202
58	col_L3.tif	0.032	0.000478734	66.8429		58	35S::UBP12_L3.tif	0.055	0.000478734	114.886		58	35S::UBP13_L3.tif	0.021	0.000478734	43.8657
59	col_L3.tif	0.055	0.000478734	114.886		59	35S::UBP12_L3.tif	0.033	0.000478734	68.9318		59	35S::UBP13_L3.tif	0.017	0.000478734	35.5103
60	col_L3.tif	0.021	0.000478734	43.8657		60	35S::UBP12_L3.tif	0.063	0.000478734	131.597		60	35S::UBP13_L3.tif	0.012	0.000478734	25.0661
61	col_L3.tif	0.254	0.000478734	530.566		61	35S::UBP12_L3.tif	0.045	0.000478734	93.9978		61	35S::UBP13_L3.tif	0.011	0.000478734	22.9773
62	col_L3.tif	0.358	0.000478734	747.805		62	35S::UBP12_L3.tif	0.031	0.000478734	64.7541		62	35S::UBP13_L3.tif	0.008	0.000478734	16.7107
63	col_L3.tif	0.077	0.000478734	160.841		63	35S::UBP12_L3.tif	0.02	0.000478734	41.7768		63	35S::UBP13_L3.tif	0.038	0.000478734	79.376
64	col_L3.tif	0.029	0.000478734	60.5764		64	35S::UBP12_L3.tif	0.014	0.000478734	29.2438		64	35S::UBP13_L3.tif	0.023	0.000478734	48.0433
65	col_L3.tif	0.027	0.000478734	56.3987		65	35S::UBP12_L3.tif	0.01	0.000478734	20.8884		65	35S::UBP13_L3.tif	0.03	0.000478734	62.6652
66	col_L3.tif	0.105	0.000478734	219.328		66	35S::UBP12_L3.tif	0.012	0.000478734	25.0661		66	35S::UBP13_L3.tif	0.046	0.000478734	96.0867
67	col_L3.tif	0.042	0.000478734	87.7313		67	35S::UBP12_L3.tif	0.011	0.000478734	22.9773		67	35S::UBP13_L3.tif	0.011	0.000478734	22.9773
68	col_L3.tif	0.077	0.000478734	160.841		68	35S::UBP12_L3.tif	0.054	0.000478734	112.797		68	35S::UBP13_L3.tif	0.01	0.000478734	20.8884
69	col_L3.tif	0.01	0.000478734	20.8884		69	35S::UBP12_L3.tif	0.039	0.000478734	81.4648		69	35S::UBP13_L3.tif	0.049	0.000478734	102.353
70	col_L3.tif	0.011	0.000478734	22.9773		70	35S::UBP12_L3.tif	0.048	0.000478734	100.264		70	35S::UBP13_L3.tif	0.049	0.000478734	102.353
71	col_L3.tif	0.264	0.000478734	551.454		71	35S::UBP12_L3.tif	0.036	0.000478734	75.1983		71	35S::UBP13_L3.tif	0.015	0.000478734	31.3326
72	col_L3.tif	0.244	0.000478734	509.677		72	35S::UBP12_L3.tif	0.014	0.000478734	29.2438		72	35S::UBP13_L3.tif	0.029	0.000478734	60.5764
73	col_L3.tif	0.155	0.000478734	323.77		73	35S::UBP12_L3.tif	0.012	0.000478734	25.0661		73	35S::UBP13_L3.tif	0.098	0.000478734	204.706
74	col_L3.tif	0.057	0.000478734	119.064		74	35S::UBP12_L3.tif	0.049	0.000478734	102.353		74	35S::UBP13_L3.tif	0.045	0.000478734	93.9978
75	col_L3.tif	0.09	0.000478734	187.996		75	35S::UBP12_L3.tif	0.075	0.000478734	156.663		75	35S::UBP13_L3.tif	0.022	0.000478734	45.9545
76	col_L3.tif	0.035	0.000478734	73.1094		76	35S::UBP12_L3.tif	0.017	0.000478734	35.5103		76	35S::UBP13_L3.tif	0.011	0.000478734	22.9773
77	col_L3.tif	0.12	0.000478734	250.661		77	35S::UBP12_L3.tif	0.029	0.000478734	60.5764		77	35S::UBP13_L3.tif	0.062	0.000478734	129.508
78	col_L3.tif	0.01	0.000478734	20.8884		78	35S::UBP12_L3.tif	0.012	0.000478734	25.0661		78	35S::UBP13_L3.tif	0.026	0.000478734	54.3099
79	col_L3.tif	0.013	0.000478734	27.1549		79	35S::UBP12_L3.tif	0.014	0.000478734	29.2438		79	35S::UBP13_L3.tif	0.029	0.000478734	60.5764
80	col_L3.tif	0.113	0.000478734	236.039		80	35S::UBP12_L3.tif	0.028	0.000478734	58.4875		80	35S::UBP13_L3.tif	0.011	0.000478734	22.9773
81	col_L3.tif	0.147	0.000478734	307.06		81	35S::UBP12_L3.tif	0.063	0.000478734	131.597		81	35S::UBP13_L3.tif	0.065	0.000478734	135.775
82	col_L3.tif	0.106	0.000478734	221.417		82	35S::UBP12_L3.tif	0.043	0.000478734	89.8202		82	35S::UBP13_L3.tif	0.031	0.000478734	64.7541
83	col_L3.tif	0.037	0.000478734	77.2871		83	35S::UBP12_L3.tif	0.065	0.000478734	135.775		83	35S::UBP13_L3.tif	0.009	0.000478734	18.7996
84	col_L3.tif	0.127	0.000478734	265.283		84	35S::UBP12_L3.tif	0.051	0.000478734	106.531		84	35S::UBP13_L3.tif	0.005	0.000478734	10.4442
85	col_L3.tif	0.034	0.000478734	71.0206		85	35S::UBP12_L3.tif	0.043	0.000478734	89.8202		85	35S::UBP13_L3.tif	0.035	0.000478734	73.1094
86	col_L3.tif	0.165	0.000478734	344.659		86	35S::UBP12_L3.tif	0.02	0.000478734	41.7768		86	35S::UBP13_L3.tif	0.026	0.000478734	54.3099
87	col_L3.tif	0.091	0.000478734	190.085		87	35S::UBP12_L3.tif	0.058	0.000478734	121.153		87	35S::UBP13_L3.tif	0.013	0.000478734	27.1549
88	col_L3.tif	0.016	0.000478734	33.4215		88	35S::UBP12_L3.tif	0.06	0.000478734	125.33		88	35S::UBP13_L3.tif	0.055	0.000478734	114.886
89	col_L3.tif	0.014	0.000478734	29.2438		89	35S::UBP12_L3.tif	0.067	0.000478734	139.952		89	35S::UBP13_L3.tif	0.049	0.000478734	102.353
90	col_L3.tif	0.043	0.000478734	89.8202		90	35S::UBP12_L3.tif	0.049	0.000478734	102.353		90	35S::UBP13_L3.tif	0.015	0.000478734	31.3326
91	col_L3.tif	0.488	0.000478734	1019.35		91	35S::UBP12_L3.tif	0.008	0.000478734	16.7107		91	35S::UBP13_L3.tif	0.023	0.000478734	48.0433
92	col_L3.tif	0.086	0.000478734	179.64		92	35S::UBP12_L3.tif	0.015	0.000478734	31.3326		92	35S::UBP13_L3.tif	0.053	0.000478734	110.709
93	col_L3.tif	0.01	0.000478734	20.8884		93	35S::UBP12_L3.tif	0.042	0.000478734	87.7313		93	35S::UBP13_L3.tif	0.093	0.000478734	194.262
94	col_L3.tif	0.019	0.000478734	39.688		94	35S::UBP12_L3.tif	0.071	0.000478734	148.308		94	35S::UBP13_L3.tif	0.055	0.000478734	114.886
95	col_L3.tif	0.099	0.000478734	206.795		95	35S::UBP12_L3.tif	0.016	0.000478734	33.4215		95	35S::UBP13_L3.tif	0.055	0.000478734	114.886
96	col_L3.tif	0.042	0.000478734	87.7313		96	35S::UBP12_L3.tif	0.031	0.000478734	64.7541		96	35S::UBP13_L3.tif	0.127	0.000478734	265.283
97	col_L3.tif	0.031	0.000478734	64.7541		97	35S::UBP12_L3.tif	0.05	0.000478734	104.442		97	35S::UBP13_L3.tif	0.025	0.000478734	52.221
98	col_L3.tif	0.117	0.000478734	244.394		98	35S::UBP12_L3.tif	0.013	0.000478734	27.1549		98	35S::UBP13_L3.tif	0.018	0.000478734	37.5991
99	col_L3.tif	0.15	0.000478734	313.326		99	35S::UBP12_L3.tif	0.011	0.000478734	22.9773		99	35S::UBP13_L3.tif	0.073	0.000478734	152.485
100	col_L3.tif	0.057	0.000478734	119.064		100	35S::UBP12_L3.tif	0.066	0.000478734	137.864		100	35S::UBP13_L3.tif	0.074	0.000478734	154.574
101	col_L3.tif	0.025	0.000478734	52.221		101	35S::UBP12_L3.tif	0.019	0.000478734	39.688		101	35S::UBP13_L3.tif	0.015	0.000478734	31.3326
102	col_L3.tif	0.176	0.000478734	367.636		102	35S::UBP12_L3.tif	0.043	0.000478734	89.8202		102	35S::UBP13_L3.tif	0.011	0.000478734	22.9773
103	col_L3.tif	0.162	0.000478734	338.392		103	35S::UBP12_L3.tif	0.032	0.000478734	66.8429		103	35S::UBP13_L3.tif	0.06	0.000478734	125.33
104	col_L3.tif	0.168	0.000478734	350.925		104	35S::UBP12_L3.tif	0.022	0.000478734	45.9545		104	35S::UBP13_L3.tif	0.009	0.000478734	18.7996
105	col_L3.tif	0.032	0.000478734	66.8429		105	35S::UBP12_L3.tif	0.035	0.000478734	73.1094		105	35S::UBP13_L3.tif	0.01	0.000478734	20.8884
106	col_L3.tif	0.089	0.000478734	185.907		106	35S::UBP12_L3.tif	0.023	0.000478734	48.0433		106	35S::UBP13_L3.tif	0.017	0.000478734	35.5103
107	col_L3.tif	0.082	0.000478734	171.285		107	35S::UBP12_L3.tif	0.033	0.000478734	68.9318		107	35S::UBP13_L3.tif	0.011	0.000478734	22.9773
108	col_L3.tif	0.011	0.000478734	22.9773		108	35S::UBP12_L3.tif	0.07	0.000478734	146.219		108	35S::UBP13_L3.tif	0.016	0.000478734	33.4215
109	col_L3.tif	0.052	0.000478734	108.62		109	35S::UBP12_L3.tif	0.069	0.000478734	144.13		109	35S::UBP13_L3.tif	0.074	0.000478734	154.574
110	col_L3.tif	0.047	0.000478734	98.1755		110	35S::UBP12_L3.tif	0.014	0.000478734	29.2438		110	35S::UBP13_L3.tif	0.053	0.000478734	110.709
111	col_L3.tif	0.19	0.000478734	396.88		111	35S::UBP12_L3.tif	0.012	0.000478734	25.0661		111	35S::UBP13_L3.tif	0.011	0.000478734	22.9773
112	col_L3.tif	0.015	0.000478734	31.3326		112	35S::UBP12_L3.tif	0.032	0.000478734	66.8429		112	35S::UBP13_L3.tif	0.009	0.000478734	18.7996
113	col_L3.tif	0.172	0.000478734	359.281		113	35S::UBP12_L3.tif	0.009	0.000478734	18.7996		113	35S::UBP13_L3.tif	0.04	0.000478734	83.5536
114	col_L3.tif	0.022	0.000478734	45.9545		114	35S::UBP12_L3.tif	0.014	0.000478734	29.2438		114	35S::UBP13_L3.tif	0.005	0.000478734	10.4442
115	col_L3.tif	0.028	0.000478734	58.4875		115	35S::UBP12_L3.tif	0.036	0.000478734	75.1983		115	35S::UBP13_L3.tif	0.036	0.000478734	75.1983
116	col_L3.tif	0.122	0.000478734	254.839		116	35S::UBP12_L3.tif	0.032	0.000478734	66.8429		116	35S::UBP13_L3.tif	0.008	0.000478734	16.7107
117	col_L3.tif	0.153	0.000478734	319.593		117	35S::UBP12_L3.tif	0.031	0.000478734	64.7541		117	35S::UBP13_L3.tif	0.037	0.000478734	77.2871
118	col_L3.tif	0.162	0.000478734	338.392		118	35S::UBP12_L3.tif	0.021	0.000478734	43.8657		118	35S::UBP13_L3.tif	0.024	0.000478734	50.1322
119	col_L3.tif	0.255	0.000478734	532.654		119	35S::UBP12_L3.tif	0.014	0.000478734	29.2438		119	35S::UBP13_L3.tif	0.046	0.000478734	96.0867
120	col_L3.tif	0.064	0.000478734	133.686		120	35S::UBP12_L3.tif	0.09	0.000478734	187.996		120	35S::UBP13_L3.tif	0.106	0.000478734	221.417
121	col_L3.tif	0.129	0.000478734	269.46		121	35S::UBP12_L3.tif	0.026	0.000478734	54.3099		121	35S::UBP13_L3.tif	0.077	0.000478734	160.841
122	col_L3.tif	0.064	0.000478734	133.686		122	35S::UBP12_L3.tif	0.011	0.000478734	22.9773		122	35S::UBP13_L3.tif	0.033	0.000478734	68.9318
123	col_L3.tif	0.132	0.000478734	275.727		123	35S::UBP12_L3.tif	0.007	0.000478734	14.6219		123	35S::UBP13_L3.tif	0.037	0.000478734	77.2871
124	col_L3.tif	0.024	0.000478734	50.1322		124	35S::UBP12_L3.tif	0.016	0.000478734	33.4215		124	35S::UBP13_L3.tif	0.055	0.000478734	114.886
125	col_L3.tif	0.017	0.000478734	35.5103		125	35S::UBP12_L3.tif	0.102	0.000478734	213.062		125	35S::UBP13_L3.tif	0.077	0.000478734	160.841
126	col_L3.tif	0.049	0.000478734	102.353		126	35S::UBP12_L3.tif	0.026	0.000478734	54.3099		126	35S::UBP13_L3.tif	0.015	0.000478734	31.3326
127	col_L3.tif	0.169	0.000478734	353.014		127	35S::UBP12_L3.tif	0.036	0.000478734	75.1983		127	35S::UBP13_L3.tif	0.019	0.000478734	39.688
128	col_L3.tif	0.065	0.000478734	135.775		128	35S::UBP12_L3.tif	0.02	0.000478734	41.7768		128	35S::UBP13_L3.tif	0.047	0.000478734	98.1755
129	col_L3.tif	0.047	0.000478734	98.1755		129	35S::UBP12_L3.tif	0.074	0.000478734	154.574		129	35S::UBP13_L3.tif	0.059	0.000478734	123.242
130	col_L3.tif	0.186	0.000478734	388.524		130	35S::UBP12_L3.tif	0.01	0.000478734	20.8884		130	35S::UBP13_L3.tif	0.028	0.000478734	58.4875
131	col_L3.tif	0.016	0.000478734	33.4215		131	35S::UBP12_L3.tif	0.006	0.000478734	12.533		131	35S::UBP13_L3.tif	0.025	0.000478734	52.221
131	col_L3.tif	0.032	0.000478734	66.8429		132	35S::UBP12_L3.tif	0.026	0.000478734	54.3099		132	35S::UBP13_L3.tif	0.061	0.000478734	127.419
						133	35S::UBP12_L3.tif	0.03	0.000478734	62.6652		133	35S::UBP13_L3.tif	0.017	0.000478734	35.5103
						134	35S::UBP12_L3.tif	0.041	0.000478734	85.6425		134	35S::UBP13_L3.tif	0.055	0.000478734	114.886
						135	35S::UBP12_L3.tif	0.021	0.000478734	43.8657		135	35S::UBP13_L3.tif	0.068	0.000478734	142.041
						136	35S::UBP12_L3.tif	0.036	0.000478734	75.1983		136	35S::UBP13_L3.tif	0.01	0.000478734	20.8884
						137	35S::UBP12_L3.tif	0.017	0.000478734	35.5103		137	35S::UBP13_L3.tif	0.011	0.000478734	22.9773
						138	35S::UBP12_L3.tif	0.044	0.000478734	91.909		138	35S::UBP13_L3.tif	0.024	0.000478734	50.1322
						139	35S::UBP12_L3.tif	0.027	0.000478734	56.3987		139	35S::UBP13_L3.tif	0.035	0.000478734	73.1094
						140	35S::UBP12_L3.tif	0.017	0.000478734	35.5103		140	35S::UBP13_L3.tif	0.038	0.000478734	79.376
						141	35S::UBP12_L3.tif	0.107	0.000478734	223.506		141	35S::UBP13_L3.tif	0.065	0.000478734	135.775
						142	35S::UBP12_L3.tif	0.121	0.000478734	252.75		142	35S::UBP13_L3.tif	0.039	0.000478734	81.4648
						143	35S::UBP12_L3.tif	0.054	0.000478734	112.797		143	35S::UBP13_L3.tif	0.081	0.000478734	169.196
						144	35S::UBP12_L3.tif	0.01	0.000478734	20.8884		144	35S::UBP13_L3.tif	0.031	0.000478734	64.7541
						145	35S::UBP12_L3.tif	0.012	0.000478734	25.0661		145	35S::UBP13_L3.tif	0.03	0.000478734	62.6652
						146	35S::UBP12_L3.tif	0.046	0.000478734	96.0867		146	35S::UBP13_L3.tif	0.162	0.000478734	338.392
						147	35S::UBP12_L3.tif	0.097	0.000478734	202.618		147	35S::UBP13_L3.tif	0.072	0.000478734	150.397
						148	35S::UBP12_L3.tif	0.034	0.000478734	71.0206		148	35S::UBP13_L3.tif	0.016	0.000478734	33.4215
						149	35S::UBP12_L3.tif	0.012	0.000478734	25.0661		149	35S::UBP13_L3.tif	0.02	0.000478734	41.7768
						150	35S::UBP12_L3.tif	0.025	0.000478734	52.221		150	35S::UBP13_L3.tif	0.044	0.000478734	91.909
						151	35S::UBP12_L3.tif	0.023	0.000478734	48.0433		151	35S::UBP13_L3.tif	0.05	0.000478734	104.442
						152	35S::UBP12_L3.tif	0.029	0.000478734	60.5764		152	35S::UBP13_L3.tif	0.031	0.000478734	64.7541
						153	35S::UBP12_L3.tif	0.085	0.000478734	177.551		153	35S::UBP13_L3.tif	0.034	0.000478734	71.0206
						154	35S::UBP12_L3.tif	0.101	0.000478734	210.973		154	35S::UBP13_L3.tif	0.058	0.000478734	121.153
						155	35S::UBP12_L3.tif	0.053	0.000478734	110.709		155	35S::UBP13_L3.tif	0.028	0.000478734	58.4875
						156	35S::UBP12_L3.tif	0.026	0.000478734	54.3099		156	35S::UBP13_L3.tif	0.05	0.000478734	104.442
						157	35S::UBP12_L3.tif	0.013	0.000478734	27.1549		157	35S::UBP13_L3.tif	0.009	0.000478734	18.7996
						158	35S::UBP12_L3.tif	0.04	0.000478734	83.5536		158	35S::UBP13_L3.tif	0.006	0.000478734	12.533
						159	35S::UBP12_L3.tif	0.011	0.000478734	22.9773		159	35S::UBP13_L3.tif	0.042	0.000478734	87.7313
						160	35S::UBP12_L3.tif	0.028	0.000478734	58.4875		160	35S::UBP13_L3.tif	0.083	0.000478734	173.374
						161	35S::UBP12_L3.tif	0.023	0.000478734	48.0433		161	35S::UBP13_L3.tif	0.084	0.000478734	175.463
						162	35S::UBP12_L3.tif	0.008	0.000478734	16.7107		162	35S::UBP13_L3.tif	0.021	0.000478734	43.8657
						163	35S::UBP12_L3.tif	0.008	0.000478734	16.7107		163	35S::UBP13_L3.tif	0.012	0.000478734	25.0661
						164	35S::UBP12_L3.tif	0.022	0.000478734	45.9545		164	35S::UBP13_L3.tif	0.009	0.000478734	18.7996
						165	35S::UBP12_L3.tif	0.058	0.000478734	121.153		165	35S::UBP13_L3.tif	0.045	0.000478734	93.9978
						166	35S::UBP12_L3.tif	0.022	0.000478734	45.9545		166	35S::UBP13_L3.tif	0.03	0.000478734	62.6652
						167	35S::UBP12_L3.tif	0.097	0.000478734	202.618		167	35S::UBP13_L3.tif	0.015	0.000478734	31.3326
						168	35S::UBP12_L3.tif	0.012	0.000478734	25.0661		168	35S::UBP13_L3.tif	0.014	0.000478734	29.2438
						169	35S::UBP12_L3.tif	0.01	0.000478734	20.8884		169	35S::UBP13_L3.tif	0.014	0.000478734	29.2438
						170	35S::UBP12_L3.tif	0.024	0.000478734	50.1322		170	35S::UBP13_L3.tif	0.08	0.000478734	167.107
												171	35S::UBP13_L3.tif	0.009	0.000478734	18.7996
												172	35S::UBP13_L3.tif	0.011	0.000478734	22.9773
												173	35S::UBP13_L3.tif	0.073	0.000478734	152.485
												174	35S::UBP13_L3.tif	0.029	0.000478734	60.5764
												175	35S::UBP13_L3.tif	0.01	0.000478734	20.8884
												176	35S::UBP13_L3.tif	0.018	0.000478734	37.5991
												177	35S::UBP13_L3.tif	0.024	0.000478734	50.1322
												178	35S::UBP13_L3.tif	0.015	0.000478734	31.3326
												179	35S::UBP13_L3.tif	0.101	0.000478734	210.973
												180	35S::UBP13_L3.tif	0.03	0.000478734	62.6652
												181	35S::UBP13_L3.tif	0.043	0.000478734	89.8202
												182	35S::UBP13_L3.tif	0.018	0.000478734	37.5991
												183	35S::UBP13_L3.tif	0.022	0.000478734	45.9545
												184	35S::UBP13_L3.tif	0.073	0.000478734	152.485
												185	35S::UBP13_L3.tif	0.077	0.000478734	160.841
