# Supplementary material for: UBP12 and UBP13 negatively regulate the activity of the ubiquitin-dependent peptidases DA1, DAR1 and DAR2
Source: eLife. 2020 Mar 25;9:e52276. doi: 10.7554/eLife.52276 (PMC7141810; doi:10.7554/eLife.52276)
Supplement: Figure 3—source data 2. [file elife-52276-fig3-data2.xlsx]

## Sheet: FS3A-B Endoreduplication index
Flow cytometry counts
Col-0									35S::UBP12_3.1									Col-0									35S::UBP13_1.1
R1
	2C	4C	8C	16C	32C	EI				2C	4C	8C	16C	32C	EI				2C	4C	8C	16C	32C	EI				2C	4C	8C	16C	32C	EI
D9	3295	1162				1.26071			D9	3034	1179				1.27985			D9	6001	3120				1.34207			D9	3201	1152				1.26465
D12	2950	3925	428	36	6	1.66889			D12	4801	4446	299	14	4	1.53346			D12	3930	5295	531	48	12	1.66718			D12	6060	3397	237	19	16	1.41032
D15	2478	4047	3718	234	12	2.16627			D15	2680	4332	2542	115	10	2.0126			D15	2292	3731	3749	249	15	2.19928			D15	2809	3845	2866	128	11	2.03582
D18	1462	2662	4754	402	32	2.45017			D18	2517	3168	4123	309	31	2.22832			D18	2171	3138	4338	393	20	2.2995			D18	2769	2911	3645	304	12	2.15766
D21	1858	2017	4331	2629	117	2.73795			D21	2332	2779	4137	685	26	2.32664			D21	2148	3023	4499	435	24	2.32511			D21	2793	2571	3560	812	44	2.25798
D24	1608	2315	5396	528	46	2.50359			D24	2538	3826	3176	340	7	2.13543			D24	1964	3151	4822	444	29	2.3682			D24	2670	2647	3604	682	31	2.24818
D27	1505	2278	6220	932	54	2.61343			D27	2297	2994	4221	567	34	2.31247			D27	1727	2778	4739	761	31	2.46104			D27	2684	2426	2903	1639	108	2.3915
R2
	2C	4C	8C	16C	32C	EI				2C	4C	8C	16C	32C	EI				2C	4C	8C	16C	32C	EI				2C	4C	8C	16C	32C	EI
D9	6976	2320				1.24957			D9	7020	2393				1.25422			D9	6888	2444				1.26189			D9	4742	1796				1.2747
D12	4311	4904	404	24	2	1.60052			D12	5270	4280	289	26	5	1.50213			D12	4486	4967	375	38	11	1.59482			D12	5581	3446	339	31	8	1.45178
D15	2585	3962	3024	199	14	2.08984			D15	2642	3407	3584	212	4	2.13991			D15	2699	3236	3606	310	18	2.1602			D15	3147	3756	2563	273	13	2.0001
D18	2165	3054	3306	261	18	2.19502			D18	2508	2802	4052	537	24	2.27109			D18	2458	2665	4162	465	13	2.27379			D18	2909	4039	2613	120	6	1.99608
D21	1943	2405	3339	436	27	2.28822			D21	2453	2717	4050	683	21	2.30492			D21	2416	2611	3999	747	33	2.32388			D21	2497	2570	3885	750	30	2.306
D24	2355	2823	4203	458	26	2.28809			D24	2381	3243	4060	231	10	2.21874			D24	2592	3042	3814	363	29	2.20681			D24	2161	2803	4495	407	13	2.3226
D27	392	526	709	56	2	2.25816			D27	2296	2553	4041	1050	26	2.39364			D27	2135	2584	4446	647	39	2.37783			D27	2270	2203	3681	1659	71	2.5
R3
	2C	4C	8C	16C	32C	EI				2C	4C	8C	16C	32C	EI				2C	4C	8C	16C	32C	EI				2C	4C	8C	16C	32C	EI
D9	5646	1966				1.25828			D9	7166	2295				1.24257			D9	6740	2387				1.26153			D9	7224	2231				1.23596
D12	4148	5195	412	41	3	1.62802			D12	5555	4048	302	26	3	1.47735			D12	4419	4808	567	49	22	1.62615			D12	6220	3449	270	37	9	1.41422
D15	2507	3275	3902	377	25	2.2205			D15	2806	4875	2193	112	11	1.96439			D15	2634	3910	3054	280	16	2.1039			D15	4199	4947	1003	32	5	1.69399
D18	2293	3080	4285	436	34	2.29285			D18	2406	2835	4106	610	22	2.29923			D18	2568	3376	3576	369	18	2.18169			D18	2946	3722	3457	182	12	2.08828
D21	2504	2767	4139	600	30	2.29133			D21	2745	3307	3984	332	15	2.18761			D21	2112	2597	4577	626	44	2.3866			D21	3260	3760	2694	209	10	1.98812
D24	2313	2769	4414	492	46	2.32121			D24	2368	2908	4448	363	11	2.28114			D24	2246	2912	4574	366	18	2.30783			D24	2362	2865	4283	451	9	2.28586
D27	2247	2353	4343	940	26	2.40912			D27	2318	2815	4052	717	35	2.32938			D27	2258	2926	4450	526	30	2.32718			D27	2653	2770	3770	717	32	2.26624
Endoreduplication index
		Col-0			35S::UBP12_3.1			Col-0			35S::UBP13_1.1
		R1	R2	R3	R1	R2	R3	R1	R2	R3	R1	R2	R3
	D9	1.26071	1.24957	1.25828	1.27985	1.25422	1.24257	1.34207	1.26189	1.26153	1.26465	1.2747	1.23596
	D12	1.66889	1.60052	1.62802	1.53346	1.50213	1.47735	1.66718	1.59482	1.62615	1.41032	1.45178	1.41422
	D15	2.16627	2.08984	2.2205	2.01261	2.13991	1.96439	2.19928	2.1602	2.1039	2.03582	2.0001	1.69399
	D18	2.45017	2.19502	2.29285	2.22832	2.27109	2.29923	2.2995	2.27379	2.18169	2.15766	1.99608	2.08828
	D21	2.73795	2.28822	2.29134	2.32664	2.30492	2.18761	2.32511	2.32388	2.3866	2.25798	2.306	1.98812
	D24	2.50359	2.28809	2.32121	2.13543	2.21874	2.28114	2.3682	2.20681	2.30783	2.24818	2.3226	2.28586
	D27	2.61343	2.25816	2.40912	2.31247	2.39364	2.32938	2.46104	2.37783	2.32718	2.3915	2.5	2.26624
Statistical analysis 35S::UBP12_3.1
Compare each cell mean with the other cell mean in that row
Number of families	1
Number of comparisons per family	7
Alpha	0.05
Sidak's multiple comparisons test	Predicted (LS) mean diff,	95,00% CI of diff,	Significant?	Summary	Adjusted P Value
Col-0 - 35S::UBP12
D9	0.01346	-0,1634 to 0,1903	No	ns	>0,9999
D12	0.1266	-0,05025 to 0,3035	No	ns	0.3047
D15	0.1177	-0,05917 to 0,2946	No	ns	0.3913
D18	0.01596	-0,1609 to 0,1928	No	ns	>0,9999
D21	0.1191	-0,05774 to 0,2960	No	ns	0.3766
D24	0.1208	-0,05601 to 0,2977	No	ns	0.3593
D27	0.06263	-0,1142 to 0,2395	No	ns	0.937
Test details	Predicted (LS) mean 1	Predicted (LS) mean 2	Predicted (LS) mean diff,	SE of diff,	N1	N2	t	DF
Col-0 - 35S::UBP12
D9	1.272	1.259	0.01346	0.06318	6	3	0.2131	49
D12	1.631	1.504	0.1266	0.06318	6	3	2.004	49
D15	2.157	2.039	0.1177	0.06318	6	3	1.863	49
D18	2.282	2.266	0.01596	0.06318	6	3	0.2526	49
D21	2.392	2.273	0.1191	0.06318	6	3	1.886	49
D24	2.333	2.212	0.1208	0.06318	6	3	1.913	49
D27	2.408	2.345	0.06263	0.06318	6	3	0.9914	49
Statistical analysis 35S::UBP13_1,1
Compare each cell mean with the other cell mean in that row
Number of families	1
Number of comparisons per family	7
Alpha	0.05
Sidak's multiple comparisons test	Predicted (LS) mean diff,	95,00% CI of diff,	Significant?	Summary	Adjusted P Value
Col-0 - 35S::UBP13
D9	0.01391	-0,1898 to 0,2176	No	ns	>0,9999
D12	0.2055	0,001806 to 0,4092	Yes	*	0.0469
D15	0.2467	0,04301 to 0,4504	Yes	**	0.0097
D18	0.2015	-0,002185 to 0,4052	No	ns	0.0541
D21	0.2082	0,004467 to 0,4118	Yes	*	0.0426
D24	0.04707	-0,1566 to 0,2508	No	ns	0.9942
D27	0.02188	-0,1818 to 0,2256	No	ns	>0,9999
Test details	Predicted (LS) mean 1	Predicted (LS) mean 2	Predicted (LS) mean diff,	SE of diff,	N1	N2	t	DF
Col-0 - 35S::UBP13
D9	1.272	1.258	0.01391	0.07276	6	3	0.1911	49
D12	1.631	1.425	0.2055	0.07276	6	3	2.824	49
D15	2.157	1.91	0.2467	0.07276	6	3	3.391	49
D18	2.282	2.081	0.2015	0.07276	6	3	2.769	49
D21	2.392	2.184	0.2082	0.07276	6	3	2.861	49
D24	2.333	2.286	0.04707	0.07276	6	3	0.647	49
D27	2.408	2.386	0.02188	0.07276	6	3	0.3008	49

## Sheet: FS3C-D Gene expression levels
Relative expression levels D15															Relative expression levels D18
		Col-0			35S::UBP12_3.1			Col-0			35S::UBP13_1.1						Col-0			35S::UBP12_3.1			Col-0			35S::UBP13_1.1
		R1	R2	R3	R1	R2	R3	R1	R2	R3	R1	R2	R3				R1	R2	R3	R1	R2	R3	R1	R2	R3	R1	R2	R3
	AN3	0.00187	0.00134		0.00262	0.00131	0.0131	0.00187	0.00106	0.00153	0.00638	0.0134	0.0135			AN3	0.00868	0.00623	0.00546	0.0112	0.00546	0.00578	0.0105	0.00347	0.00593	0.00707	0.0079	0.00577
	CYCB1;1	0.0385	0.0818		0.076	0.0507	0.19	0.0782	0.0899	0.0623	0.0826	0.181	0.173			CYCB1;1	0.022	0.0188	0.0242	0.0255	0.0461	0.0372	0.0227	0.0304	0.0227	0.0338	0.0343	0.0357
	ANT	0.129	0.102		0.115	0.0883	0.27	0.162	0.1	0.14	0.179	0.173	0.276			ANT	0.0577	0.0499	0.0886	0.0701	0.0634	0.0992	0.0655	0.0462	0.0652	0.105	0.0813	0.154
	GRF5	0.000579			0.000738	0.00101	0.039	0.000944	0.00329	0.000491	0.0164	0.0192	0.0256			GRF5	0.000331	0.000255	0.000245	0.000314	0.000862		0.000353	0.000342	0.000479	0.00173	0.00965	0.001
	KLUH		0.00235		0.00653		0.00234	0.00213		0.00474	0.00562		0.0132			KLUH	0	0	0		2.95e-05		0	0	0		0.00259	0.0027
Fractional difference to Col-0															Fractional difference to Col-0
		35S::UBP12_3.1		35S::UBP13_1.1													35S::UBP12_3.1		35S::UBP13_1.1
		Mean	SEM	Mean	SEM												Mean	SEM	Mean	SEM
	AN3	2.70056	2.46115	6.23164	1.7038											AN3	0.114477	0.324984	0.0300472	0.181606
	ANT	0.246182	0.462076	0.653502	0.304923											ANT	0.247387	0.215813	0.824176	0.389011
	CYCB1;1	0.505085	0.641244	1.0749	0.524136											CYCB1;1	0.545455	0.274353	0.474432	0.101426
	GRF5	9.24334	10.8633	14.3846	7.95011											GRF5	0.759601	0.839786	11.3491	8.38561
	KLUH	0.443059	0.786554	2.06182	1.48795											KLUH
Statistical analysis D15															Statistical analysis D18
Table Analyzed	Row stats of Day 15 Proliferation genes														Table Analyzed	Row stats of Day 18 Proliferation genes
Two-way ANOVA	Ordinary														Two-way ANOVA	Ordinary
Alpha	0.05														Alpha	0.05
Source of Variation	% of total variation	P value	P value summary	Significant?											Source of Variation	% of total variation	P value	P value summary	Significant?
Interaction	3.542	0.5462	ns	No											Interaction	6.127	0.0019	**	Yes
Row Factor	76.24	<0,0001	****	Yes											Row Factor	80.77	<0,0001	****	Yes
Column Factor	4.522	0.0187	*	Yes											Column Factor	2.952	0.0018	**	Yes
ANOVA table	SS (Type III)	DF	MS	F (DFn, DFd)	P value										ANOVA table	SS (Type III)	DF	MS	F (DFn, DFd)	P value
Interaction	0.009706	8	0.001213	F (8, 35) = 0,8755	P=0,5462										Interaction	0.003747	8	0.0004683	F (8, 41) = 3,834	P=0,0019
Row Factor	0.2089	4	0.05222	F (4, 35) = 37,68	P<0,0001										Row Factor	0.0494	4	0.01235	F (4, 41) = 101,1	P<0,0001
Column Factor	0.01239	2	0.006195	F (2, 35) = 4,470	P=0,0187										Column Factor	0.001806	2	0.0009028	F (2, 41) = 7,392	P=0,0018
Residual	0.04851	35	0.001386												Residual	0.005008	41	0.0001221
Within each row, compare columns (simple effects within rows)															Within each row, compare columns (simple effects within rows)
Number of families	5														Number of families	5
Number of comparisons per family	2														Number of comparisons per family	2
Alpha	0.05														Alpha	0.05
Dunnett's multiple comparisons test	Predicted (LS) mean diff,	95,00% CI of diff,	Significant?	Summary	Adjusted P Value										Dunnett's multiple comparisons test	Predicted (LS) mean diff,	95,00% CI of diff,	Significant?	Summary	Adjusted P Value
AN3															AN3
Col-0 vs. 35S::UBP12	-0.004143	-0,06717 to 0,05888	No	ns	0.9842										Col-0 vs. 35S::UBP12	-0.0007683	-0,01880 to 0,01726	No	ns	0.9935
Col-0 vs. 35S::UBP13	-0.009559	-0,07258 to 0,05347	No	ns	0.9192										Col-0 vs. 35S::UBP13	-0.0002017	-0,01823 to 0,01783	No	ns	0.9996
CYCB1;1															CYCB1;1
Col-0 vs. 35S::UBP12	-0.03543	-0,09845 to 0,02760	No	ns	0.3448										Col-0 vs. 35S::UBP12	-0.0128	-0,03083 to 0,005231	No	ns	0.1979
Col-0 vs. 35S::UBP13	-0.07539	-0,1384 to -0,01237	Yes	*	0.0171										Col-0 vs. 35S::UBP13	-0.01113	-0,02916 to 0,006897	No	ns	0.2858
ANT															ANT
Col-0 vs. 35S::UBP12	-0.03117	-0,09419 to 0,03186	No	ns	0.4324										Col-0 vs. 35S::UBP12	-0.01538	-0,03341 to 0,002647	No	ns	0.1044
Col-0 vs. 35S::UBP13	-0.08273	-0,1458 to -0,01971	Yes	**	0.0086										Col-0 vs. 35S::UBP13	-0.05125	-0,06928 to -0,03322	Yes	****	<0,0001
GRF5															GRF5
Col-0 vs. 35S::UBP12	-0.01226	-0,07802 to 0,05351	No	ns	0.8789										Col-0 vs. 35S::UBP12	-0.0002538	-0,02110 to 0,02059	No	ns	0.9994
Col-0 vs. 35S::UBP13	-0.01907	-0,08484 to 0,04669	No	ns	0.7358										Col-0 vs. 35S::UBP13	-0.003793	-0,02185 to 0,01426	No	ns	0.8566
KLUH															KLUH
Col-0 vs. 35S::UBP12	-0.001362	-0,08007 to 0,07734	No	ns	0.9989										Col-0 vs. 35S::UBP12	-2.95e-05	-0,02767 to 0,02761	No	ns	>0,9999
Col-0 vs. 35S::UBP13	-0.006337	-0,08504 to 0,07237	No	ns	0.9762										Col-0 vs. 35S::UBP13	-0.002645	-0,02354 to 0,01825	No	ns	0.946
Test details	Predicted (LS) mean 1	Predicted (LS) mean 2	Predicted (LS) mean diff,	SE of diff,	N1	N2	q	DF							Test details	Predicted (LS) mean 1	Predicted (LS) mean 2	Predicted (LS) mean diff,	SE of diff,	N1	N2	q	DF
AN3															AN3
Col-0 vs. 35S::UBP12	0.001534	0.005677	-0.004143	0.02719	5	3	0.1524	35							Col-0 vs. 35S::UBP12	0.006712	0.00748	-0.0007683	0.007815	6	3	0.09832	41
Col-0 vs. 35S::UBP13	0.001534	0.01109	-0.009559	0.02719	5	3	0.3516	35							Col-0 vs. 35S::UBP13	0.006712	0.006913	-0.0002017	0.007815	6	3	0.02581	41
CYCB1;1															CYCB1;1
Col-0 vs. 35S::UBP12	0.07014	0.1056	-0.03543	0.02719	5	3	1.303	35							Col-0 vs. 35S::UBP12	0.02347	0.03627	-0.0128	0.007815	6	3	1.638	41
Col-0 vs. 35S::UBP13	0.07014	0.1455	-0.07539	0.02719	5	3	2.773	35							Col-0 vs. 35S::UBP13	0.02347	0.0346	-0.01113	0.007815	6	3	1.425	41
ANT															ANT
Col-0 vs. 35S::UBP12	0.1266	0.1578	-0.03117	0.02719	5	3	1.146	35							Col-0 vs. 35S::UBP12	0.06218	0.07757	-0.01538	0.007815	6	3	1.968	41
Col-0 vs. 35S::UBP13	0.1266	0.2093	-0.08273	0.02719	5	3	3.043	35							Col-0 vs. 35S::UBP13	0.06218	0.1134	-0.05125	0.007815	6	3	6.558	41
GRF5															GRF5
Col-0 vs. 35S::UBP12	0.001326	0.01358	-0.01226	0.02843	4	3	0.4311	35							Col-0 vs. 35S::UBP12	0.0003342	0.000588	-0.0002538	0.009024	6	2	0.02813	41
Col-0 vs. 35S::UBP13	0.001326	0.0204	-0.01907	0.02843	4	3	0.6708	35							Col-0 vs. 35S::UBP13	0.0003342	0.004127	-0.003793	0.007815	6	3	0.4853	41
KLUH															KLUH
Col-0 vs. 35S::UBP12	0.003073	0.004435	-0.001362	0.03398	3	2	0.04007	35							Col-0 vs. 35S::UBP12	0	2.95e-05	-2.95e-05	0.01194	6	1	0.002471	41
Col-0 vs. 35S::UBP13	0.003073	0.00941	-0.006337	0.03398	3	2	0.1865	35							Col-0 vs. 35S::UBP13	0	0.002645	-0.002645	0.009024	6	2	0.2931	41
