# Supplementary material for: UBP12 and UBP13 negatively regulate the activity of the ubiquitin-dependent peptidases DA1, DAR1 and DAR2
Source: eLife. 2020 Mar 25;9:e52276. doi: 10.7554/eLife.52276 (PMC7141810; doi:10.7554/eLife.52276)
Supplement: Figure 5—source data 1. [file elife-52276-fig5-data1.xlsx]

## Sheet: F5 in vivo deubi Col-0_ubp12-2
	Hours after deubiquitination	Pixels		Relative intensity to 0h		Lane quantification
Col-0	0	22175.9		100
	2	11816.5		53.2852
	4	8342.76		37.6209
	6	7168.03		32.3236
	8	4942.69		22.2886
	Hours after deubiquitination	Pixels		Relative intensity to 0h		Lane quantification
ubp12-2	0	23031.8		100
	2	19774.1		85.8556
	4	18057.9		78.4041
	6	15228.9		66.1211
	8	10997.7		47.75

## Sheet: F5 in vivo deubi 35S-UBP12-13
	Lane	Pixels		Hours after deubiquitination	Pixels		Relative intensity to 0h
Col-0	1	20676.6		0	18183.7		100		Lane quantification
	2	5566.42		2	5566.42		30.6122
	3	3542.43		4	3542.43		19.4814
	4	4352.33		6	4352.33		23.9354
	5	3558.01		8	3558.01		19.5671
	6	15690.7
	Lane	Pixels		Hours after deubiquitination	Pixels		Relative intensity to 0h
ubp12-2	1	7705.98		0	18212.2		100		Lane quantification
	2	8642.64		2	8642.64		47.4553
	3	6287.38		4	6287.38		34.5229
	4	3797.55		6	3797.55		20.8517
	5	3014.96		8	3014.96		16.5547
	6	18212.2
	Lane	Pixels		Hours after deubiquitination	Pixels		Relative intensity to 0h
35S::UBP12	1	18943.3		0	18445.8		100		Lane quantification
	2	3662.08		2	3662.08		19.8532
	3	2035.94		4	2035.94		11.0374
	4	1657.11		6	1657.11		8.98369
	5	1724.18		8	1724.18		9.34731
	6	17948.2
	Lane	Pixels		Hours after deubiquitination	Pixels		Relative intensity to 0h
35S::UBP13	1	18839.2		0	17984.3		100		Lane quantification
	2	4106.33		2	4106.33		22.8328
	3	2948.89		4	2948.89		16.397
	4	2723.06		6	2723.06		15.1413
	5	1127.77		8	1127.77		6.27085
	6	17129.4
