# Supplementary material for: UBP12 and UBP13 negatively regulate the activity of the ubiquitin-dependent peptidases DA1, DAR1 and DAR2
Source: eLife. 2020 Mar 25;9:e52276. doi: 10.7554/eLife.52276 (PMC7141810; doi:10.7554/eLife.52276)
Supplement: Figure 6—source data 1. [file elife-52276-fig6-data1.xlsx]

## Sheet: F6_FS1 Rel express DA1 UBP12-13
Relative expression levels
	UBP12			UBP13			DA1
	Mean	SEM	n	Mean	SEM	n	Mean	SEM	n
Col-0	0.347833	0.026883	3	0.239167	0.089753	3	-0.113	0.145427	3
35S::GFP-DA1	0.253167	0.186312	3	0.1685	0.073971	3	3.9345	0.829961	3
35S::UBP12_3.1 (+/-)	2.167	0.123427	3	-0.49517	0.099817	3	2.364	0.221368	3
35S::UBP12_3.1 (+/+)	2.05028	0.165879	3	-0.72056	0.076868	3	2.21911	0.094889	3
35S::UBP12_3.2 (+/-)	1.86833	0.138389	3	-0.5245	0.209773	3	2.1355	0.114707	3
35S::UBP12_3.2 (+/+)	2.40828	0.188853	3	-0.10389	0.332507	3	2.48911	0.030802	3
35S::UBP13_2.1 (+/+)	0.232833	0.259319	3	1.90183	0.450026	3	2.48	0.188492	3
35S::UBP13_2.2 (+/-)	-1.18272	0.145917	3	2.08194	0.05703	3	2.21978	0.074453	3
35S::UBP13_2.2 (+/+)	-0.98644	0.03469	3	1.45572	0.501577	3	2.06239	0.204269	3
Statistical analysis
Table Analyzed	35S::GFP-DA1 background UBP12-13-DA1
Two-way ANOVA	Ordinary
Alpha	0.05
Source of Variation	% of total variation	P value	P value summary	Significant?
Interaction	54.52	<0,0001	****	Yes
Row Factor	9.054	<0,0001	****	Yes
Column Factor	29.79	<0,0001	****	Yes
ANOVA table	SS	DF	MS	F (DFn, DFd)	P value
Interaction	85.17	16	5.323	F (16, 54) = 27,71	P<0,0001
Row Factor	14.14	8	1.768	F (8, 54) = 9,204	P<0,0001
Column Factor	46.54	2	23.27	F (2, 54) = 121,1	P<0,0001
Residual	10.37	54	0.1921
Within each column, compare rows (simple effects within columns)
Number of families	3
Number of comparisons per family	8
Alpha	0.05
Dunnett's multiple comparisons test	Mean Diff,	95,00% CI of diff,	Significant?	Summary	Adjusted P Value
UBP12
Col-0 vs. 35S::GFP-DA1	0.09467	-0,8865 to 1,076	No	ns	0.9996
Col-0 vs. 35S::UBP12_3.1 (+/-)	-1.819	-2,800 to -0,8380	Yes	****	<0,0001
Col-0 vs. 35S::UBP12_3.1 (+/+)	-1.702	-2,684 to -0,7212	Yes	***	0.0001
Col-0 vs. 35S::UBP12_3.2 (+/-)	-1.521	-2,502 to -0,5393	Yes	***	0.0006
Col-0 vs. 35S::UBP12_3.2 (+/+)	-2.06	-3,042 to -1,079	Yes	****	<0,0001
Col-0 vs. 35S::UBP13_2.1 (+/+)	0.115	-0,8662 to 1,096	No	ns	0.9996
Col-0 vs. 35S::UBP13_2.2 (+/-)	1.531	0,5493 to 2,512	Yes	***	0.0006
Col-0 vs. 35S::UBP13_2.2 (+/+)	1.334	0,3531 to 2,315	Yes	**	0.0033
UBP13
Col-0 vs. 35S::GFP-DA1	0.07067	-0,9105 to 1,052	No	ns	0.9997
Col-0 vs. 35S::UBP12_3.1 (+/-)	0.7343	-0,2469 to 1,716	No	ns	0.2244
Col-0 vs. 35S::UBP12_3.1 (+/+)	0.9597	-0,02149 to 1,941	No	ns	0.0578
Col-0 vs. 35S::UBP12_3.2 (+/-)	0.7637	-0,2175 to 1,745	No	ns	0.1917
Col-0 vs. 35S::UBP12_3.2 (+/+)	0.3431	-0,6382 to 1,324	No	ns	0.9035
Col-0 vs. 35S::UBP13_2.1 (+/+)	-1.663	-2,644 to -0,6815	Yes	***	0.0002
Col-0 vs. 35S::UBP13_2.2 (+/-)	-1.843	-2,824 to -0,8616	Yes	****	<0,0001
Col-0 vs. 35S::UBP13_2.2 (+/+)	-1.217	-2,198 to -0,2353	Yes	**	0.0087
DA1
Col-0 vs. 35S::GFP-DA1	-4.048	-5,029 to -3,066	Yes	****	<0,0001
Col-0 vs. 35S::UBP12_3.1 (+/-)	-2.477	-3,458 to -1,496	Yes	****	<0,0001
Col-0 vs. 35S::UBP12_3.1 (+/+)	-2.332	-3,313 to -1,351	Yes	****	<0,0001
Col-0 vs. 35S::UBP12_3.2 (+/-)	-2.249	-3,230 to -1,267	Yes	****	<0,0001
Col-0 vs. 35S::UBP12_3.2 (+/+)	-2.602	-3,583 to -1,621	Yes	****	<0,0001
Col-0 vs. 35S::UBP13_2.1 (+/+)	-2.593	-3,574 to -1,612	Yes	****	<0,0001
Col-0 vs. 35S::UBP13_2.2 (+/-)	-2.333	-3,314 to -1,352	Yes	****	<0,0001
Col-0 vs. 35S::UBP13_2.2 (+/+)	-2.175	-3,157 to -1,194	Yes	****	<0,0001
Test details	Mean 1	Mean 2	Mean Diff,	SE of diff,	N1	N2	q	DF
UBP12
Col-0 vs. 35S::GFP-DA1	0.3478	0.2532	0.09467	0.3579	3	3	0.2645	54
Col-0 vs. 35S::UBP12_3.1 (+/-)	0.3478	2.167	-1.819	0.3579	3	3	5.083	54
Col-0 vs. 35S::UBP12_3.1 (+/+)	0.3478	2.05	-1.702	0.3579	3	3	4.757	54
Col-0 vs. 35S::UBP12_3.2 (+/-)	0.3478	1.868	-1.521	0.3579	3	3	4.249	54
Col-0 vs. 35S::UBP12_3.2 (+/+)	0.3478	2.408	-2.06	0.3579	3	3	5.758	54
Col-0 vs. 35S::UBP13_2.1 (+/+)	0.3478	0.2328	0.115	0.3579	3	3	0.3213	54
Col-0 vs. 35S::UBP13_2.2 (+/-)	0.3478	-1.183	1.531	0.3579	3	3	4.277	54
Col-0 vs. 35S::UBP13_2.2 (+/+)	0.3478	-0.9864	1.334	0.3579	3	3	3.728	54
UBP13
Col-0 vs. 35S::GFP-DA1	0.2392	0.1685	0.07067	0.3579	3	3	0.1975	54
Col-0 vs. 35S::UBP12_3.1 (+/-)	0.2392	-0.4952	0.7343	0.3579	3	3	2.052	54
Col-0 vs. 35S::UBP12_3.1 (+/+)	0.2392	-0.7206	0.9597	0.3579	3	3	2.682	54
Col-0 vs. 35S::UBP12_3.2 (+/-)	0.2392	-0.5245	0.7637	0.3579	3	3	2.134	54
Col-0 vs. 35S::UBP12_3.2 (+/+)	0.2392	-0.1039	0.3431	0.3579	3	3	0.9586	54
Col-0 vs. 35S::UBP13_2.1 (+/+)	0.2392	1.902	-1.663	0.3579	3	3	4.646	54
Col-0 vs. 35S::UBP13_2.2 (+/-)	0.2392	2.082	-1.843	0.3579	3	3	5.149	54
Col-0 vs. 35S::UBP13_2.2 (+/+)	0.2392	1.456	-1.217	0.3579	3	3	3.399	54
DA1
Col-0 vs. 35S::GFP-DA1	-0.113	3.935	-4.048	0.3579	3	3	11.31	54
Col-0 vs. 35S::UBP12_3.1 (+/-)	-0.113	2.364	-2.477	0.3579	3	3	6.922	54
Col-0 vs. 35S::UBP12_3.1 (+/+)	-0.113	2.219	-2.332	0.3579	3	3	6.517	54
Col-0 vs. 35S::UBP12_3.2 (+/-)	-0.113	2.136	-2.249	0.3579	3	3	6.283	54
Col-0 vs. 35S::UBP12_3.2 (+/+)	-0.113	2.489	-2.602	0.3579	3	3	7.271	54
Col-0 vs. 35S::UBP13_2.1 (+/+)	-0.113	2.48	-2.593	0.3579	3	3	7.246	54
Col-0 vs. 35S::UBP13_2.2 (+/-)	-0.113	2.22	-2.333	0.3579	3	3	6.519	54
Col-0 vs. 35S::UBP13_2.2 (+/+)	-0.113	2.062	-2.175	0.3579	3	3	6.079	54
