# Supplementary material for: UBP12 and UBP13 negatively regulate the activity of the ubiquitin-dependent peptidases DA1, DAR1 and DAR2
Source: eLife. 2020 Mar 25;9:e52276. doi: 10.7554/eLife.52276 (PMC7141810; doi:10.7554/eLife.52276)
Supplement: Supplementary file 1. [file elife-52276-supp1.xlsx]

## Sheet: Sheet1
Gene	Gene code	Primername	Application	Sequence
UBP12 (AT5G06600)		qUBP12_FW	Q-RT-PCR	AACCCGAGACTGCTGCGAGT
UBP12 (AT5G06600)		qUBP12_REV	Q-RT-PCR	GGTGTTTTGCCTAGAGAAATTAG
UBP13 (AT3G11910)		qUBP13_FW	Q-RT-PCR	AGACGAGGAGATGCTTGTTCCG
UBP13 (AT3G11910)		qUBP13_REV	Q-RT-PCR	AGCAGGATCAGTTTGGGCAACTTC
AT1G13320	AT1G13320	Ref1_AT1G13320_FW	Q-RT-PCR	TAACGTGGCCAAAATGATGC
AT1G13320	AT1G13320	Ref1_AT1G13320_REV	Q-RT-PCR	GTTCTCCACAACCGCTTGGT
AT2G32170	AT2G32170	Ref2_AT2G32170_FW	Q-RT-PCR	ATCGAGCTAAGTTTGGAGGATGTAA
AT2G32170	AT2G32170	Ref2_AT2G32170_REV	Q-RT-PCR	TCTCGATCACAAACCCAAAATG
AT2G28390	AT2G28390	Ref3_AT2G28390_FW	Q-RT-PCR	AACTCTATGCAGCATTTGATCCACT
AT2G28390	AT2G28390	Ref3_AT2G28390_REV	Q-RT-PCR	TGATTGCATATCTTTATCGCCATC
AN3 (AT4G19850)		qAN3_FW	Q-RT-PCR	CAGGGAGAAGGAGGGTCACAC
AN3 (AT4G19850)		qAN3_REV	Q-RT-PCR	ATTGAAGATCGAGCCGCCATTAG
ANT (AT4G37750)		qANT_FW	Q-RT-PCR	AGGTGGTTCCAACAAAGAAGTCAG
ANT (AT4G37750)		qANT_REV	Q-RT-PCR	GACGGTCTTAAGCTCAGCATTAGG
GRF5 (AT3G13960)		qGRF5_FW	Q-RT-PCR	TCAGTTCAATGTCTTAGCCTCTGC
GRF5 (AT3G13960)		qGRF5_REV	Q-RT-PCR	CCCAACTCCTCCAACTCTCTCC
CYCB1;1 (AT4G37490)		qCYCB1;1_FW	Q-RT-PCR	ACCTCGCAGCTGTGGAATATGTG
CYCB1;1 (AT4G37490)		qCYCB1;1_REV	Q-RT-PCR	ATCTCGTGGCCTCCATTCACTCTC
KLUH (AT1G13710)		qKLU_FW	Q-RT-PCR	GCGATTCTAGTGGAATGGGT
KLUH (AT1G13710)		qKLU_REV	Q-RT-PCR	AGCTTGAAGGTACGGCAGTT
SALK_018601		ubp15_1_LP	Genotyping T-DNA	TCGCTTGATGATGACTCTGTG
SALK_018601		ubp15_1_RP	Genotyping T-DNA	AACCAGGTTAAATGCCTGAGG
		ubp12-1_LP	Genotyping T-DNA	GCTTCCCTTATTTGTCCAACC
		ubp12-1_RP	Genotyping T-DNA	TTTGCGTCTTGGTTTTACCTG
ubp12-2w (GABI_742C10)		ubp12-2w_LP	Genotyping T-DNA	GGCGGTTCTACAAGGACAAC
ubp12-2w (GABI_742C10)		ubp12-2w_RP	Genotyping T-DNA	CTCACATCACAGCATTTTTGG
		ubp13-1_LP	Genotyping T-DNA	CATGTGGTGACCTTCAAATAGC
		ubp13-1_RP	Genotyping T-DNA	AATTCTGAATGCCTGCGTAAG
		ubp13-2_LP	Genotyping T-DNA	GCTTGCTTGGTAGCATCACAC
		ubp13-2_RP	Genotyping T-DNA	CCAAGGTGCTACCTGTTACATG
		ubp13-3_LP	Genotyping T-DNA	TCTTTCTTCCATTTCTTATTTGCC
		ubp13-3_RP	Genotyping T-DNA	AGCCACCCTTTCCACTACATC

## Sheet: Sheet2
Primer	Application	Sequence
qUBP12_FW	Q-RT-PCR	AACCCGAGACTGCTGCGAGT
qUBP12_REV	Q-RT-PCR	GGTGTTTTGCCTAGAGAAATTAG
qUBP13_FW	Q-RT-PCR	AGACGAGGAGATGCTTGTTCCG
qUBP13_REV	Q-RT-PCR	AGCAGGATCAGTTTGGGCAACTTC
Ref1_AT1G13320_FW	Q-RT-PCR	TAACGTGGCCAAAATGATGC
Ref1_AT1G13320_REV	Q-RT-PCR	GTTCTCCACAACCGCTTGGT
Ref2_AT2G32170_FW	Q-RT-PCR	ATCGAGCTAAGTTTGGAGGATGTAA
Ref2_AT2G32170_REV	Q-RT-PCR	TCTCGATCACAAACCCAAAATG
Ref3_AT2G28390_FW	Q-RT-PCR	AACTCTATGCAGCATTTGATCCACT
Ref3_AT2G28390_REV	Q-RT-PCR	TGATTGCATATCTTTATCGCCATC
qAN3_FW	Q-RT-PCR	CAGGGAGAAGGAGGGTCACAC
qAN3_REV	Q-RT-PCR	ATTGAAGATCGAGCCGCCATTAG
qANT_FW	Q-RT-PCR	AGGTGGTTCCAACAAAGAAGTCAG
qANT_REV	Q-RT-PCR	GACGGTCTTAAGCTCAGCATTAGG
qGRF5_FW	Q-RT-PCR	TCAGTTCAATGTCTTAGCCTCTGC
qGRF5_REV	Q-RT-PCR	CCCAACTCCTCCAACTCTCTCC
qCYCB1;1_FW	Q-RT-PCR	ACCTCGCAGCTGTGGAATATGTG
qCYCB1;1_REV	Q-RT-PCR	ATCTCGTGGCCTCCATTCACTCTC
qKLU_FW	Q-RT-PCR	GCGATTCTAGTGGAATGGGT
qKLU_REV	Q-RT-PCR	AGCTTGAAGGTACGGCAGTT
qDA1_FW	Q-RT-PCR	CACGGCAATGTGAAGTTACC
qDA1_REV	Q-RT-PCR	ATCCTTTGAGCCTCATCCAC
LBb1.3	Genotyping T-DNA	ATTTTGCCGATTTCGGAAC
LB_GABI	Genotyping T-DNA	ATATTGACCATCATACTCATTGC
ubp12-1_LP	Genotyping T-DNA	GCTTCCCTTATTTGTCCAACC
ubp12-1_RP	Genotyping T-DNA	TTTGCGTCTTGGTTTTACCTG
ubp12-2w_LP	Genotyping T-DNA	GGCGGTTCTACAAGGACAAC
ubp12-2w_RP	Genotyping T-DNA	CTCACATCACAGCATTTTTGG
ubp13-1_LP	Genotyping T-DNA	CATGTGGTGACCTTCAAATAGC
ubp13-1_RP	Genotyping T-DNA	AATTCTGAATGCCTGCGTAAG
ubp13-2_LP	Genotyping T-DNA	GCTTGCTTGGTAGCATCACAC
ubp13-2_RP	Genotyping T-DNA	CCAAGGTGCTACCTGTTACATG
ubp13-3_LP	Genotyping T-DNA	TCTTTCTTCCATTTCTTATTTGCC
ubp13-3_RP	Genotyping T-DNA	AGCCACCCTTTCCACTACATC
UBP12_B1	Cloning	GGGGACAAGTTTGTACAAAAAAGCAGGCTTAATGACTATGATGACTCCGCC
UBP12_B2 + S	Cloning	GGGGACCACTTTGTACAAGAAAGCTGGGTACTAATTGTATATTTTTACCG
UBP12_B2 - S	Cloning	GGGGACCACTTTGTACAAGAAAGCTGGGTAATTGTATATTTTTACCGGCT
UBP13_B1	Cloning	GGGGACAAGTTTGTACAAAAAAGCAGGCTTAATGACTATGATGACTCCGCC
UBP13_B2 + S	Cloning	GGGGACCACTTTGTACAAGAAAGCTGGGTACTAATTGTATATTTTCACCGG
UBP13_B2 - S	Cloning	GGGGACCACTTTGTACAAGAAAGCTGGGTAATTGTATATTTTCACCGGCT
UBP15_B1	Cloning	GGGGACAAGTTTGTACAAAAAAGCAGGCTTAATGCTTGAACCAAGGGGAG
UBP15_B2 +S	Cloning	GGGGACCACTTTGTACAAGAAAGCTGGGTACTACCAGTAACTGTAAGTTC
UBP15_B2 -S	Cloning	GGGGACCACTTTGTACAAGAAAGCTGGGTACCAGTAACTGTAAGTTCTATC
HA-tag_B2 +S	Cloning	GGGGACCACTTTGTACAAGAAAGCTGGGTATCAAGCGTAATCTGGAAC
UBP3_B1	Cloning	GGGGACAAGTTTGTACAAAAAAGCAGGCTTAATGGGCGCCGCGGGCT
UBP3_B2 +S	Cloning	GGGGACCACTTTGTACAAGAAAGCTGGGTATCACTTGGTCGGTCCAAGG
UBP3_B2 -S	Cloning	GGGGACCACTTTGTACAAGAAAGCTGGGTACTTGGTCGGTCCAAGGCT
UBP24_B1	Cloning	GGGGACAAGTTTGTACAAAAAAGCAGGCTTAATGAGTGAAAAGAAGGTATTTG
UBP24_B2	Cloning	GGGGACCACTTTGTACAAGAAAGCTGGGTATTACACTTGCTTGTAGAAGA
DA1_B1	Cloning	GGGGACAAGTTTGTACAAAAAAGCAGGCTTAATGGGTTGGTTTAACAAGATC
DA1_B2 +S	Cloning	GGGGACCACTTTGTACAAGAAAGCTGGGTATTAAACCGGGAATCTACCG
DA1_B2 -S	Cloning	GGGGACCACTTTGTACAAGAAAGCTGGGTAAACCGGGAATCTACCGGT
DAR1_B1	Cloning	GGGGACAAGTTTGTACAAAAAAGCAGGCTTAATGGGGTGGCTAACTAAAATC
DAR1_B2 +S	Cloning	GGGGACCACTTTGTACAAGAAAGCTGGGTATTAAGGAAATGTACCGGTCA
DAR1_B2 -S	Cloning	GGGGACCACTTTGTACAAGAAAGCTGGGTAAGGAAATGTACCGGTCAAG
DAR2_B1	Cloning	GGGGACAAGTTTGTACAAAAAAGCAGGCTTAATGGATTCTTCTTCCTCTTC
DAR2_B2 +S	Cloning	GGGGACCACTTTGTACAAGAAAGCTGGGTATCACAAAGGAAAAGTTCCAG
DAR2_B2 -S	Cloning	GGGGACCACTTTGTACAAGAAAGCTGGGTACAAAGGAAAAGTTCCAGTTA
UBP12_C208S_FW	Site-directed mutation	AACCAAGGTGCAACATCCTACATGAATTCTCTC
UBP12_C208S_REV	Site-directed mutation	GAGAGAATTCATGTAGGATGTTGCACCTTGGTT
UBP13_C207S_FW	Site-directed mutation	AACCAAGGTGCTACCTCTTACATGAATTCTCTC
UBP13_C207S_REV	Site-directed mutation	GAGAGAATTCATGTAAGAGGTAGCACCTTGGTT
DA1H418A, H422A_FW	Site-directed mutation	TCGATTCTAGCTGCTGAGATGATGGCTGCGTGGATGA
DA1H418A, H422A_FW	Site-directed mutation	TCATCCACGCAGCCATCATCTCAGCAGCTAGAATCGA
gibson_p35S_pGGA	Gibson assembly primer p35S	GTGAAGCTTGGTCTCAAACAGACTAGAGCCAAGCTGAT
gibson_t35S_pGGA	Gibson assembly primer t35S	CGAGAATTCGGTCTCAAGCCAGGTCACTGGATTTTGGT
gibson_p35S_pGGB	Gibson assembly primer p35S	GTGAAGCTTGGTCTCAGGCTGACTAGAGCCAAGCTGAT
gibson_t35S_pGGB	Gibson assembly primer t35S	CGAGAATTCGGTCTCACTGAAGGTCACTGGATTTTGGT
p35S-bsaI-FW	Site-directed mutation	TAGAGAGGCCTACGCGGCAGGACTCATCAAGACGATCTACC
p35S-bsaI-REV	Site-directed mutation	GGTAGATCGTCTTGATGAGTCCTGCCGCGTAGGCCTCTCTA
DAR1_bsaI_FW	Site-directed mutation	GTCACCACGGTGTTAAGGAGGCCAAGAATTGGGGCAGGCTA
DAR1_bsaI__REV	Site-directed mutation	TAGCCTGCCCCAATTCTTGGCCTCCTTAACACCGTGGTGAC
