# Supplementary material for: UBP12 and UBP13 negatively regulate the activity of the ubiquitin-dependent peptidases DA1, DAR1 and DAR2
Source: eLife. 2020 Mar 25;9:e52276. doi: 10.7554/eLife.52276 (PMC7141810; doi:10.7554/eLife.52276)
Supplement: Supplementary file 2. [file elife-52276-supp2.xlsx]

## Sheet: Sheet1
Gene	Gene code	Primername	Application	Sequence
UBP12 (AT5G06600)		qUBP12_FW	Q-RT-PCR	AACCCGAGACTGCTGCGAGT
UBP12 (AT5G06600)		qUBP12_REV	Q-RT-PCR	GGTGTTTTGCCTAGAGAAATTAG
UBP13 (AT3G11910)		qUBP13_FW	Q-RT-PCR	AGACGAGGAGATGCTTGTTCCG
UBP13 (AT3G11910)		qUBP13_REV	Q-RT-PCR	AGCAGGATCAGTTTGGGCAACTTC
AT1G13320	AT1G13320	Ref1_AT1G13320_FW	Q-RT-PCR	TAACGTGGCCAAAATGATGC
AT1G13320	AT1G13320	Ref1_AT1G13320_REV	Q-RT-PCR	GTTCTCCACAACCGCTTGGT
AT2G32170	AT2G32170	Ref2_AT2G32170_FW	Q-RT-PCR	ATCGAGCTAAGTTTGGAGGATGTAA
AT2G32170	AT2G32170	Ref2_AT2G32170_REV	Q-RT-PCR	TCTCGATCACAAACCCAAAATG
AT2G28390	AT2G28390	Ref3_AT2G28390_FW	Q-RT-PCR	AACTCTATGCAGCATTTGATCCACT
AT2G28390	AT2G28390	Ref3_AT2G28390_REV	Q-RT-PCR	TGATTGCATATCTTTATCGCCATC
AN3 (AT4G19850)		qAN3_FW	Q-RT-PCR	CAGGGAGAAGGAGGGTCACAC
AN3 (AT4G19850)		qAN3_REV	Q-RT-PCR	ATTGAAGATCGAGCCGCCATTAG
ANT (AT4G37750)		qANT_FW	Q-RT-PCR	AGGTGGTTCCAACAAAGAAGTCAG
ANT (AT4G37750)		qANT_REV	Q-RT-PCR	GACGGTCTTAAGCTCAGCATTAGG
GRF5 (AT3G13960)		qGRF5_FW	Q-RT-PCR	TCAGTTCAATGTCTTAGCCTCTGC
GRF5 (AT3G13960)		qGRF5_REV	Q-RT-PCR	CCCAACTCCTCCAACTCTCTCC
CYCB1;1 (AT4G37490)		qCYCB1;1_FW	Q-RT-PCR	ACCTCGCAGCTGTGGAATATGTG
CYCB1;1 (AT4G37490)		qCYCB1;1_REV	Q-RT-PCR	ATCTCGTGGCCTCCATTCACTCTC
KLUH (AT1G13710)		qKLU_FW	Q-RT-PCR	GCGATTCTAGTGGAATGGGT
KLUH (AT1G13710)		qKLU_REV	Q-RT-PCR	AGCTTGAAGGTACGGCAGTT
SALK_018601		ubp15_1_LP	Genotyping T-DNA	TCGCTTGATGATGACTCTGTG
SALK_018601		ubp15_1_RP	Genotyping T-DNA	AACCAGGTTAAATGCCTGAGG
		ubp12-1_LP	Genotyping T-DNA	GCTTCCCTTATTTGTCCAACC
		ubp12-1_RP	Genotyping T-DNA	TTTGCGTCTTGGTTTTACCTG
ubp12-2w (GABI_742C10)		ubp12-2w_LP	Genotyping T-DNA	GGCGGTTCTACAAGGACAAC
ubp12-2w (GABI_742C10)		ubp12-2w_RP	Genotyping T-DNA	CTCACATCACAGCATTTTTGG
		ubp13-1_LP	Genotyping T-DNA	CATGTGGTGACCTTCAAATAGC
		ubp13-1_RP	Genotyping T-DNA	AATTCTGAATGCCTGCGTAAG
		ubp13-2_LP	Genotyping T-DNA	GCTTGCTTGGTAGCATCACAC
		ubp13-2_RP	Genotyping T-DNA	CCAAGGTGCTACCTGTTACATG
		ubp13-3_LP	Genotyping T-DNA	TCTTTCTTCCATTTCTTATTTGCC
		ubp13-3_RP	Genotyping T-DNA	AGCCACCCTTTCCACTACATC

## Sheet: Sheet2
Recombinant Protein	Approximate molecular mass (kD)	Growth Volume	Beads volume	IPTG	Incubation time	Induction temperature
HIS-MBP-DA1	105.42	500ml	100ul	0.1mM	Overnight	18°C
HIS-MBP-DAR1	108.36	500ml	100ul	0.1mM	Overnight	18°C
HIS-MBP-DAR2	104.48	500ml	100ul	0.1mM	Overnight	18°C
HIS-MBP-DA1H418A, H422A	105.29	500ml	100ul	0.1mM	Overnight	18°C
HIS-DA2	47.6	500ml	100ul	0.1mM	3h	28°C
GST-UBP12	158.36	12L	100ul	0.1mM	Overnight	18°C
GST-UBP13	158.4	12L	100ul	0.1mM	Overnight	18°C
GST-UBP12C208S	158.34	12L	100ul	0.1mM	Overnight	18°C
GST-UBP13C207S	158.38	12L	100ul	0.1mM	Overnight	18°C
GST-UBP3	70.18	6L	100ul	0.1mM	Overnight	18°C
GST-UBP15	131.8	90L	100ul	0.1mM	Overnight	18°C
GST-UBP24	88.18	1L	100ul	0.1mM	Overnight	18°C
