# Supplementary figures and images for: UBP12 and UBP13 negatively regulate the activity of the ubiquitin-dependent peptidases DA1, DAR1 and DAR2
Source: eLife journal article supplement (doi:10.7554/elife.52276), 2020-03-25

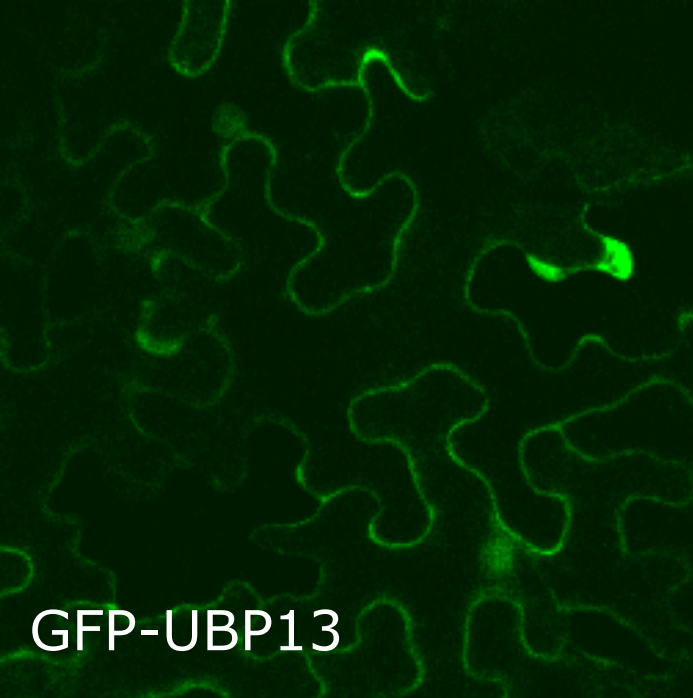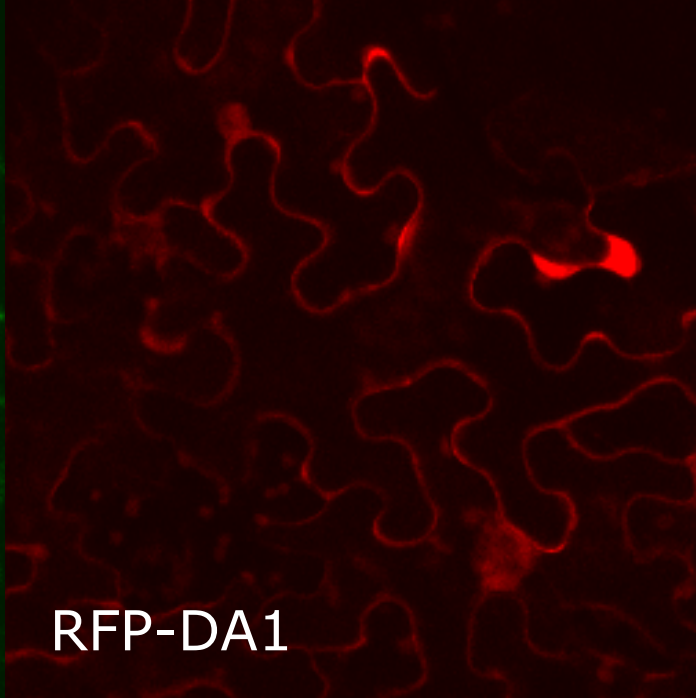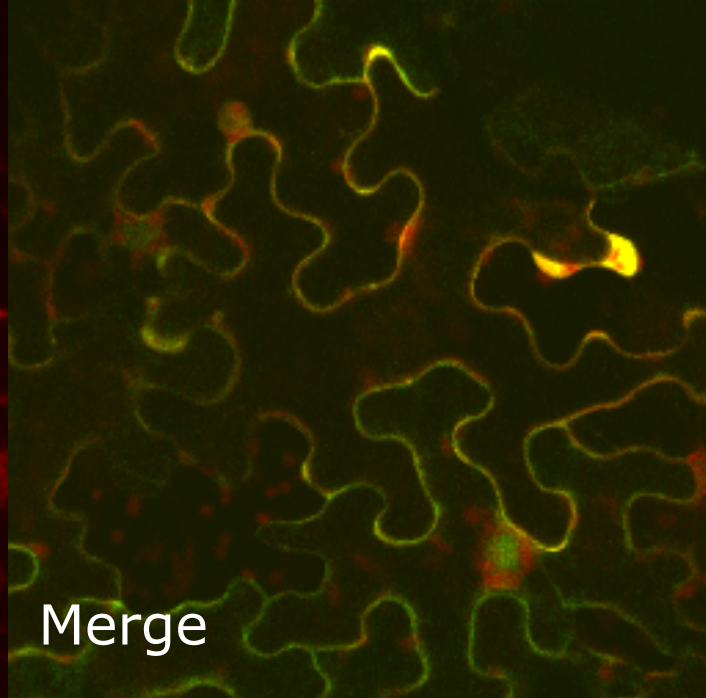

Supplement: supp [file elife-52276-supp-v1.zip]

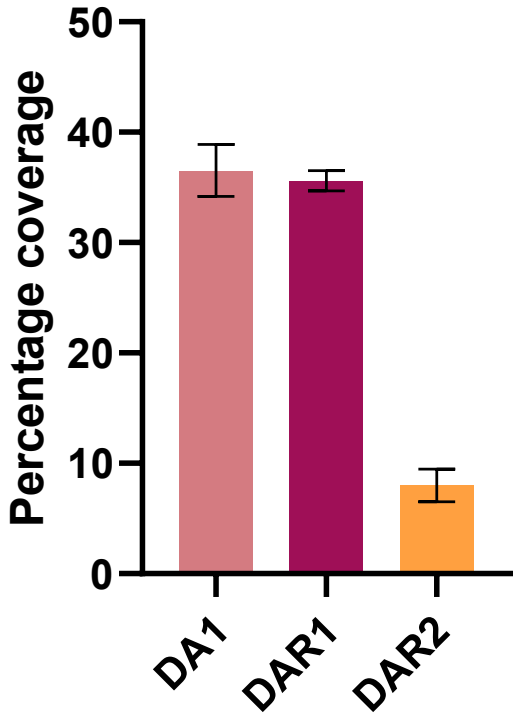

Supplement: supp [file elife-52276-supp-v1.zip]

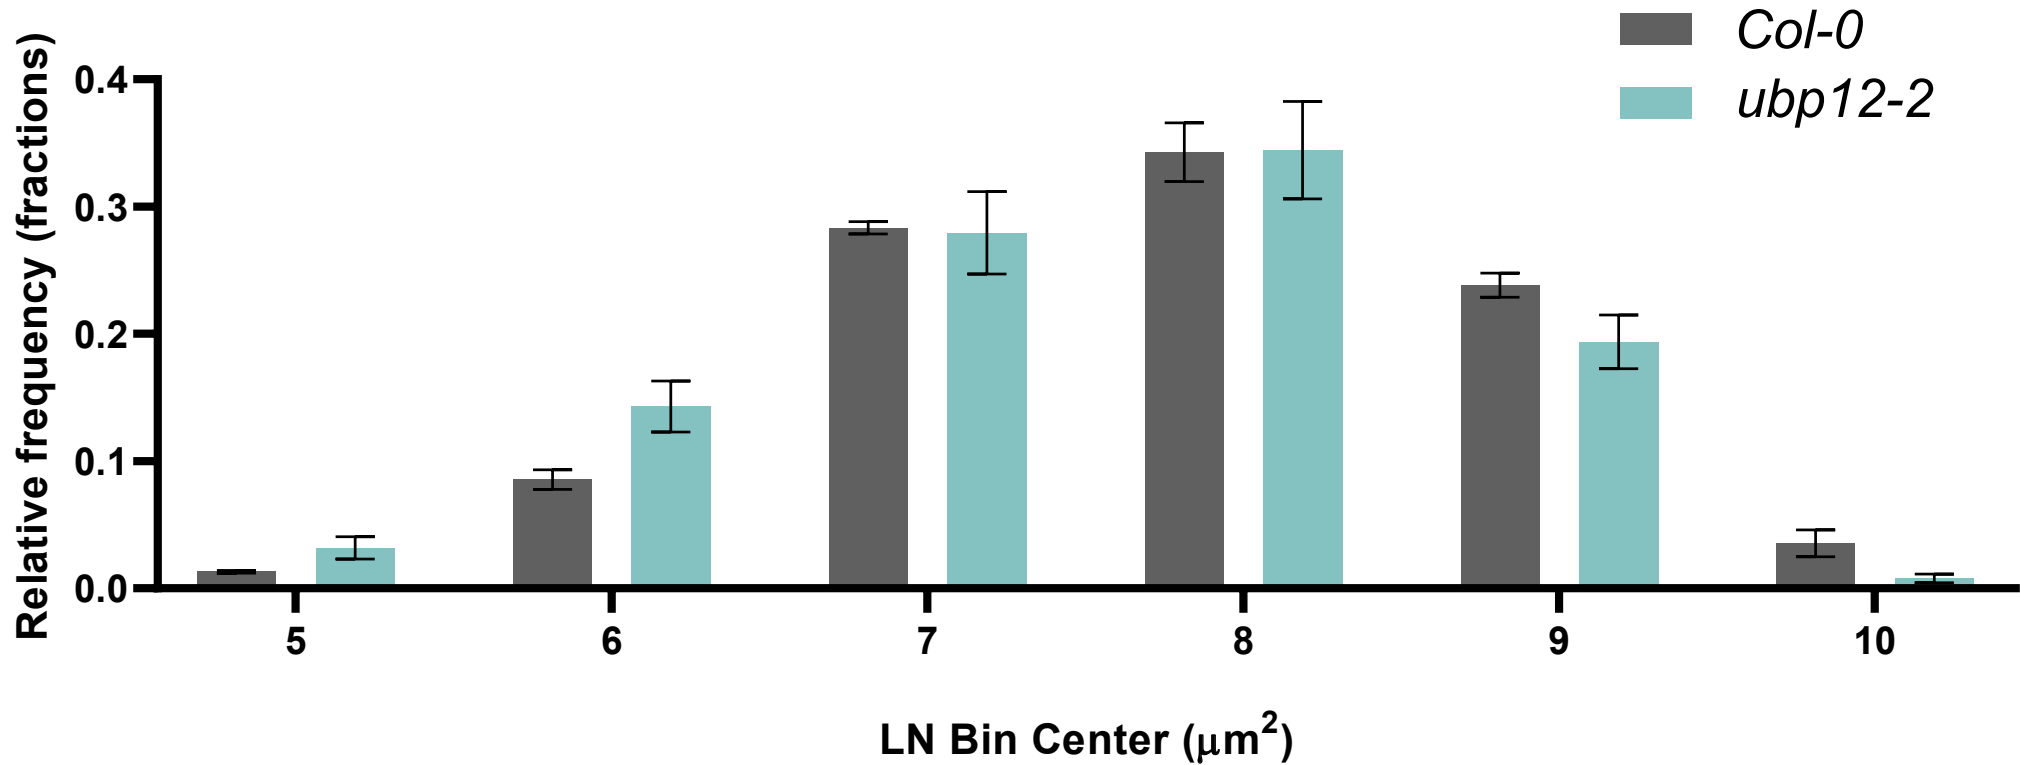

Supplement: supp [file elife-52276-supp-v1.zip]

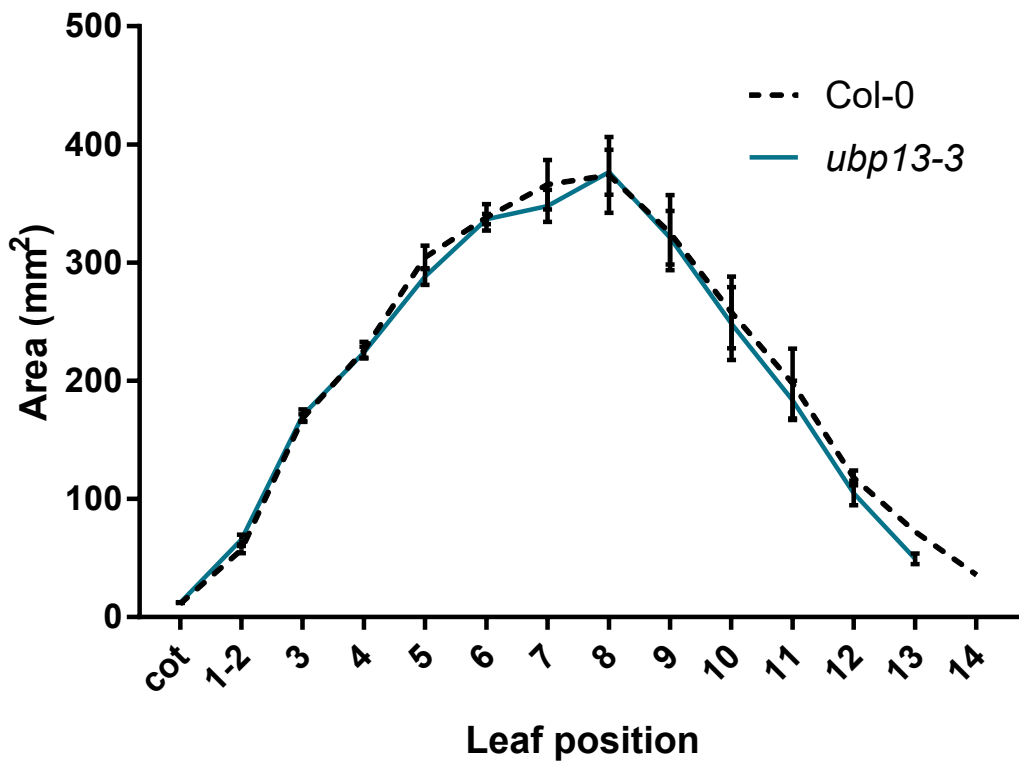

Supplement: supp [file elife-52276-supp-v1.zip]

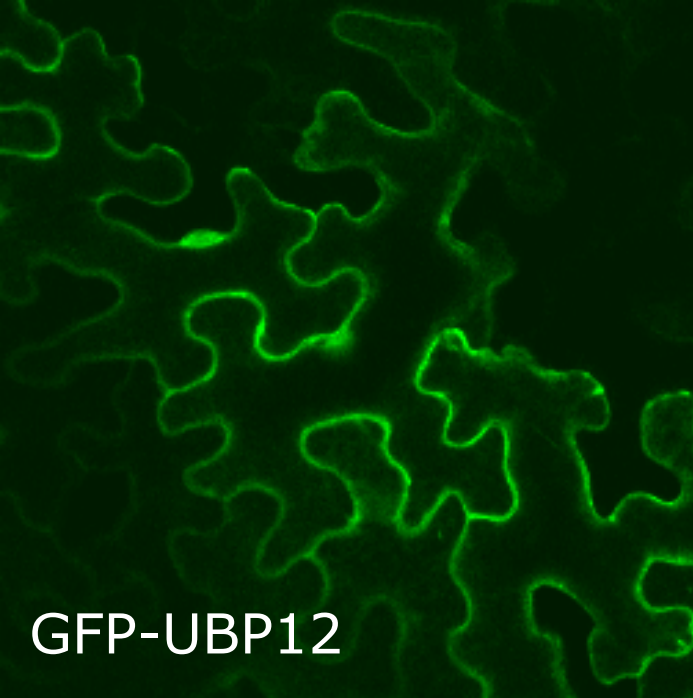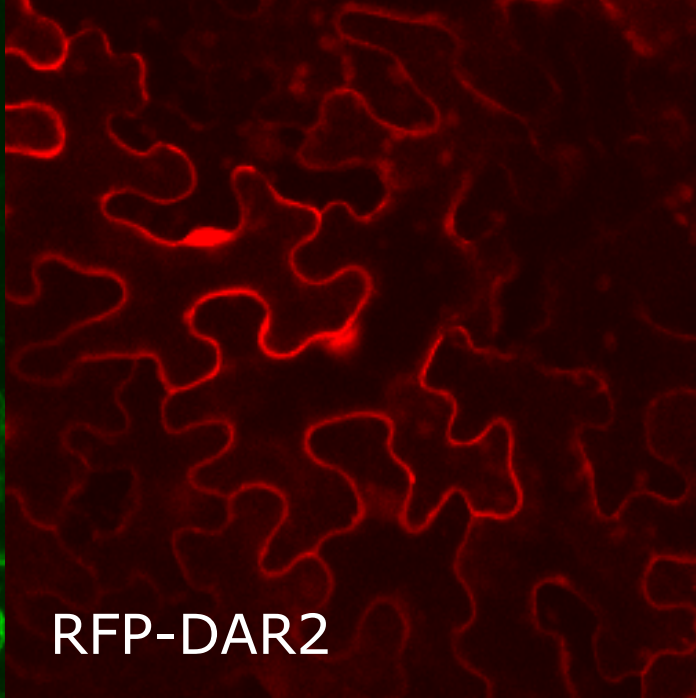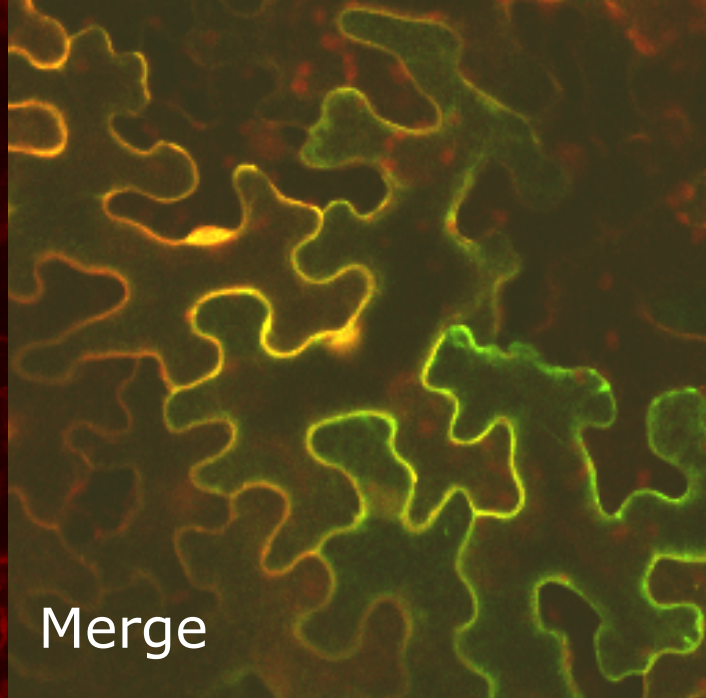

Supplement: supp [file elife-52276-supp-v1.zip]

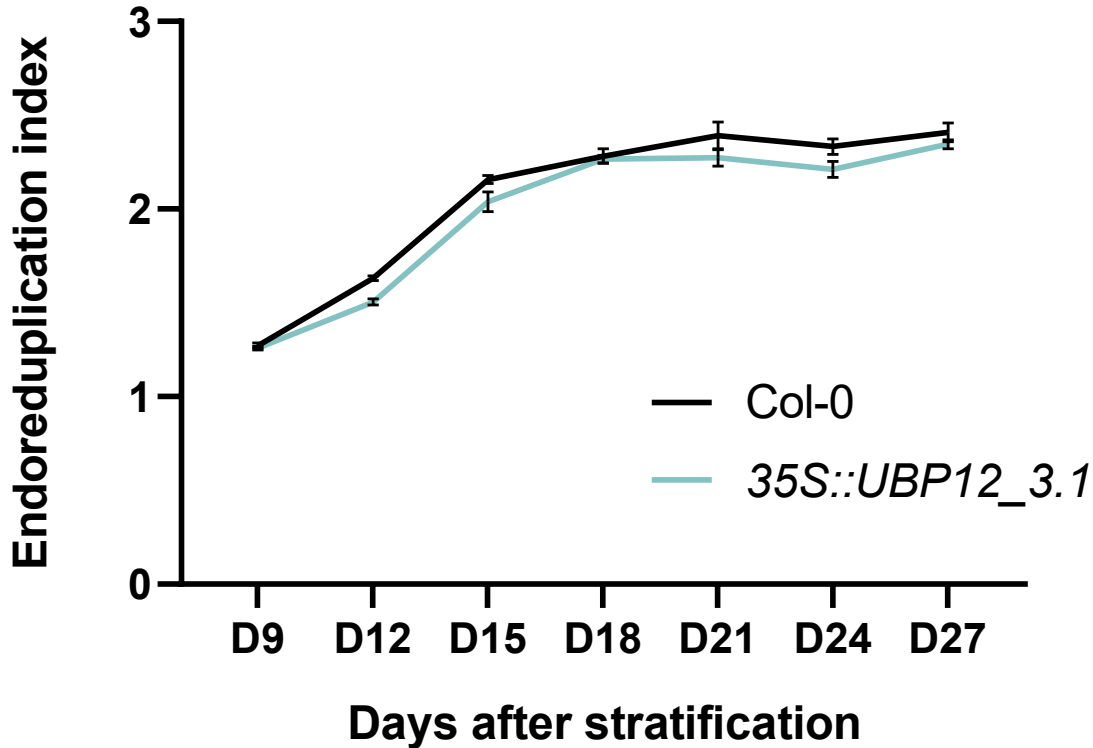

Supplement: supp [file elife-52276-supp-v1.zip]

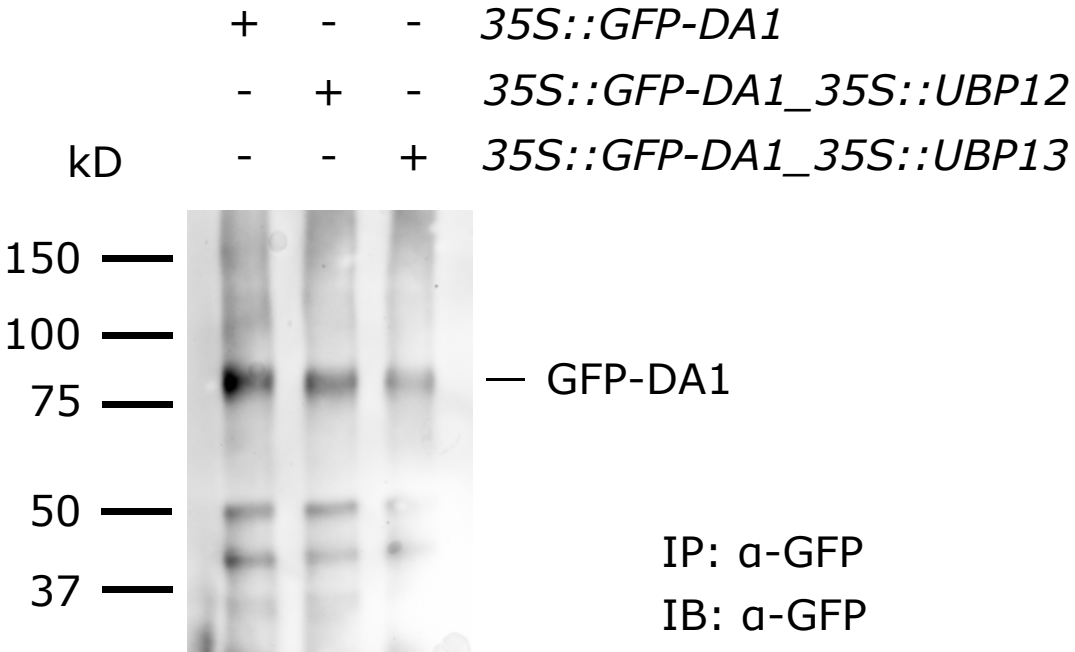

Supplement: supp [file elife-52276-supp-v1.zip]

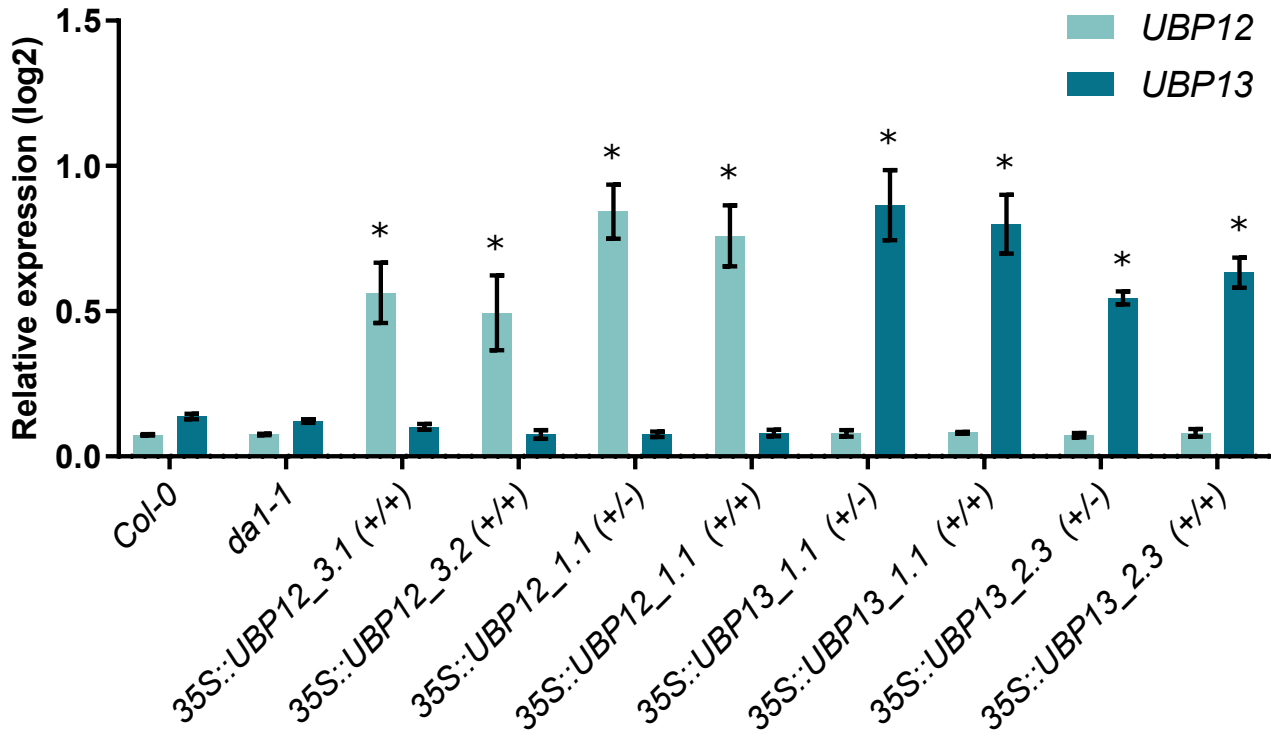

Supplement: supp [file elife-52276-supp-v1.zip]

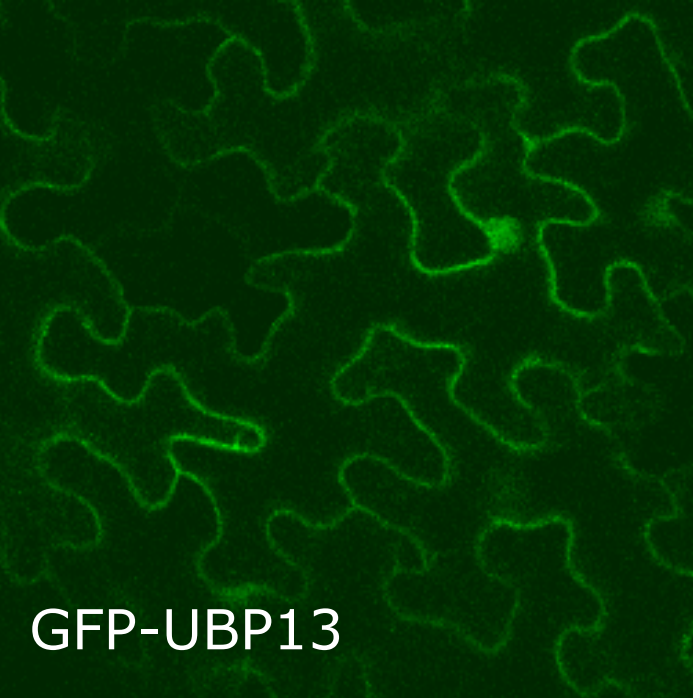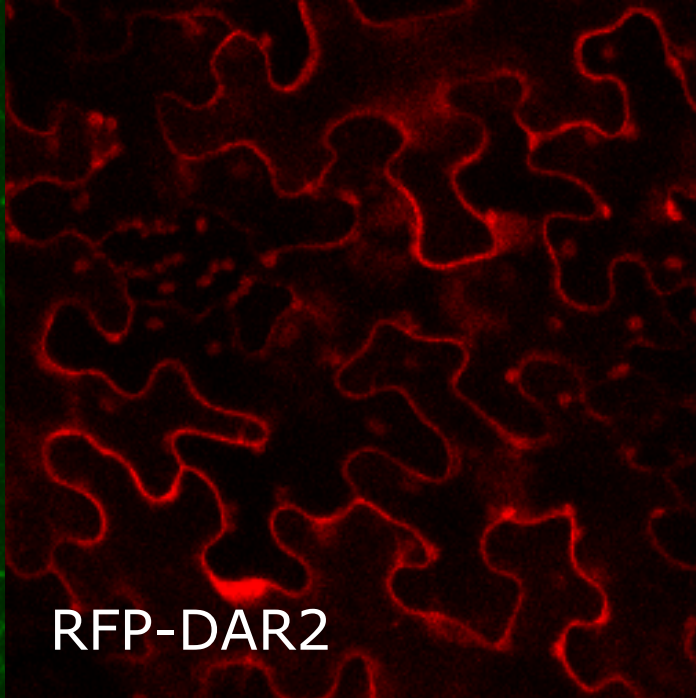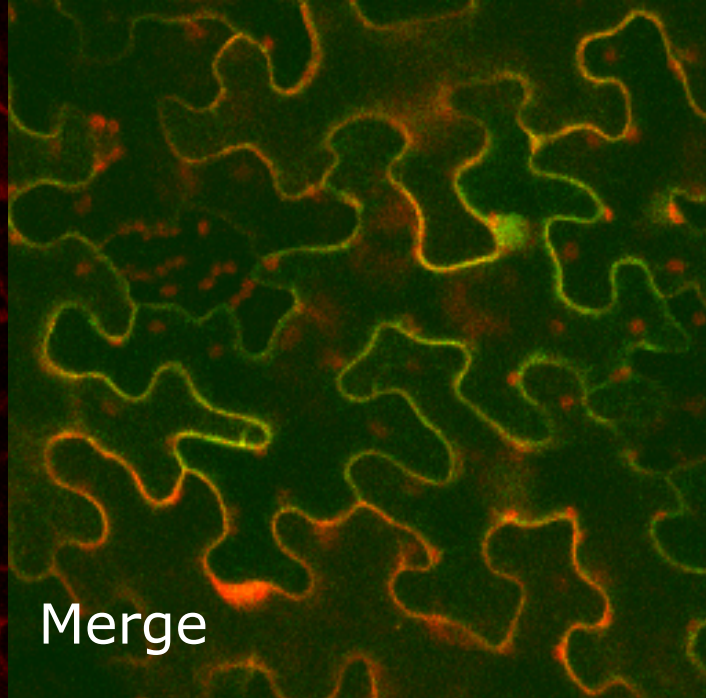

Supplement: supp [file elife-52276-supp-v1.zip]

Day 15

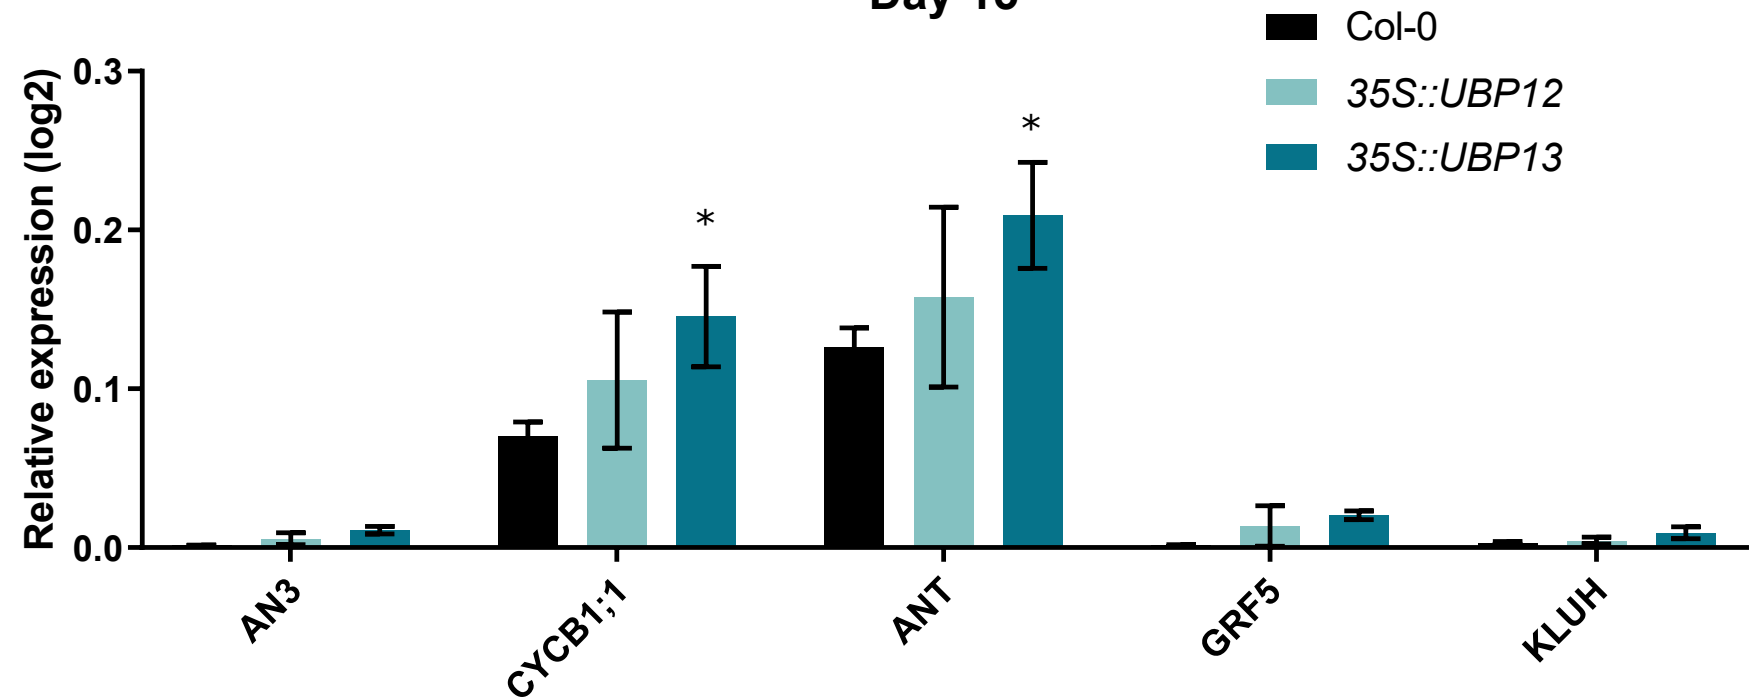

Supplement: supp [file elife-52276-supp-v1.zip]

Leaf blade index

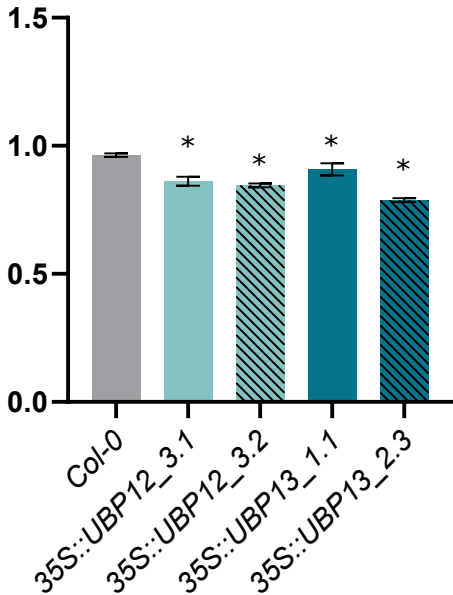

Supplement: supp [file elife-52276-supp-v1.zip]

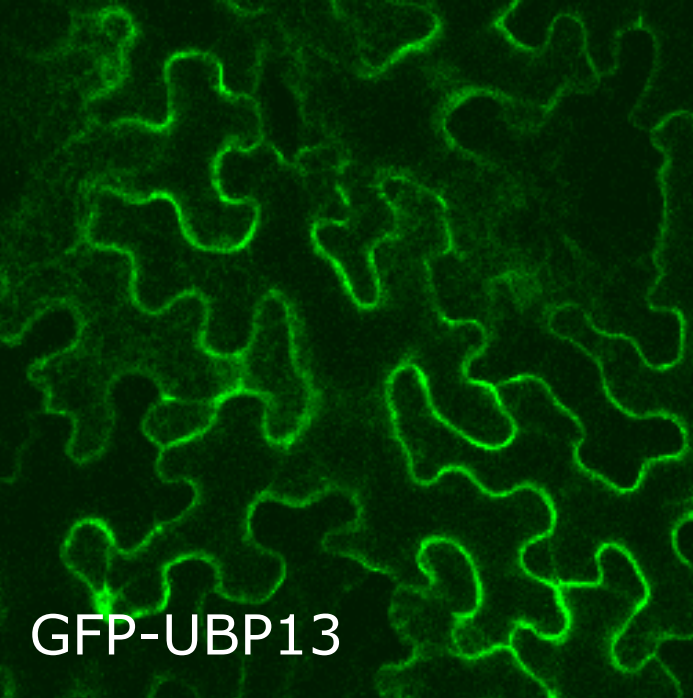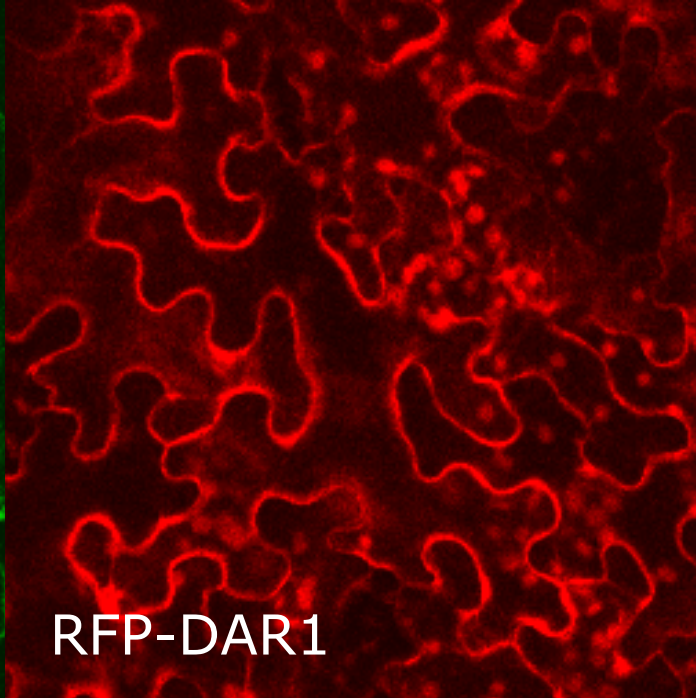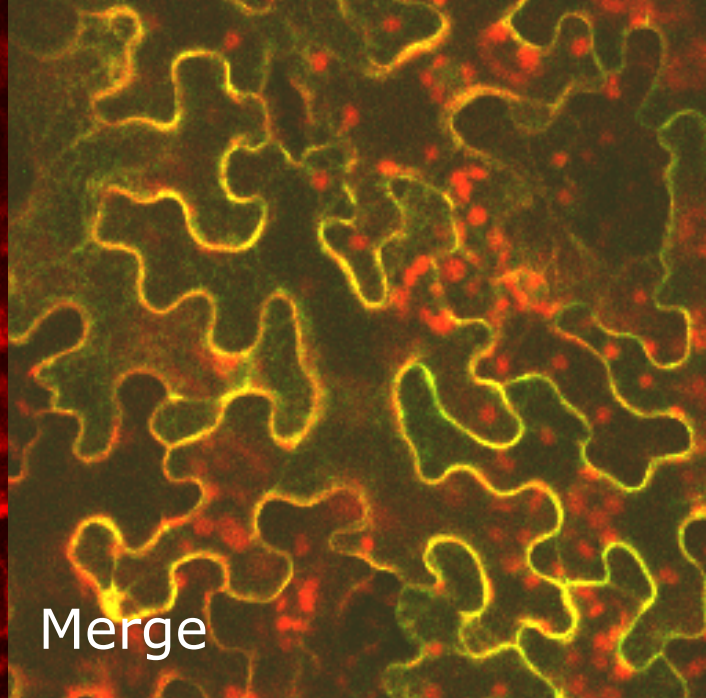

Supplement: supp [file elife-52276-supp-v1.zip]

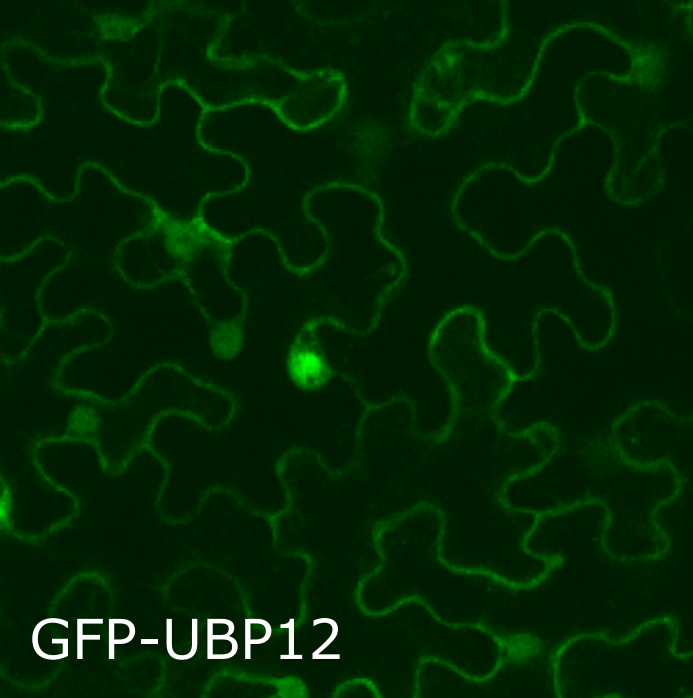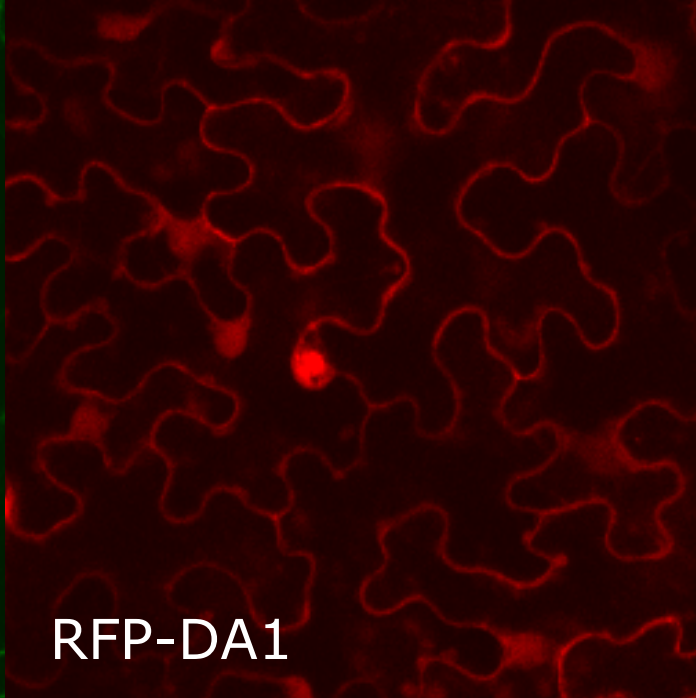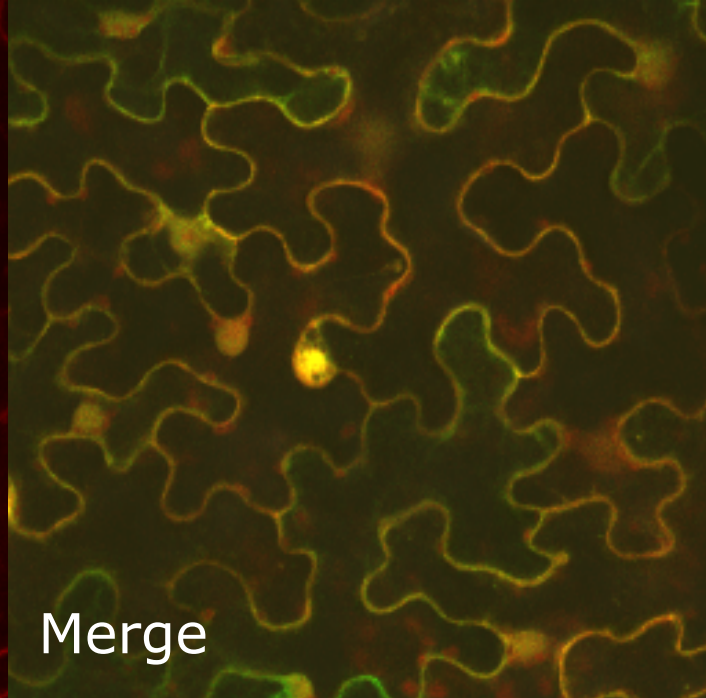

Supplement: supp [file elife-52276-supp-v1.zip]

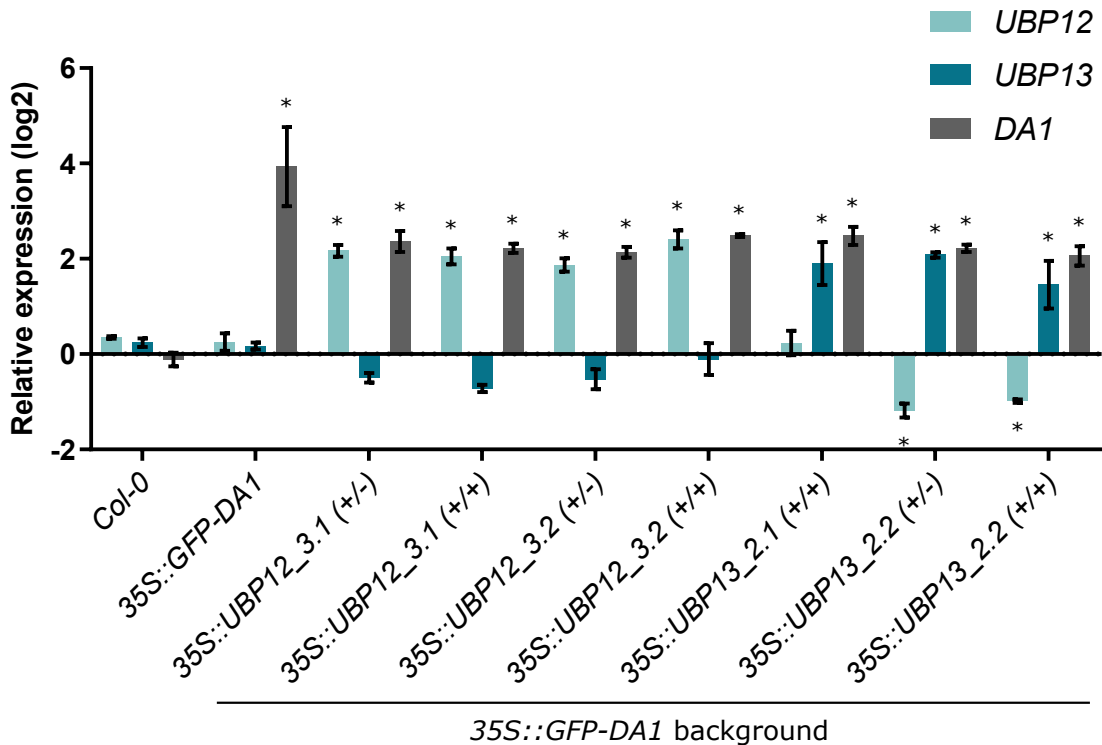

Supplement: supp [file elife-52276-supp-v1.zip]

Col-0

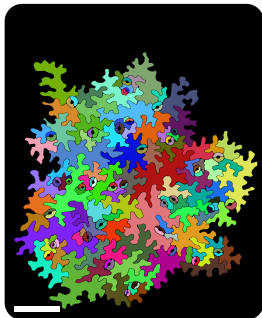

*35S::UBP12\_3.1*

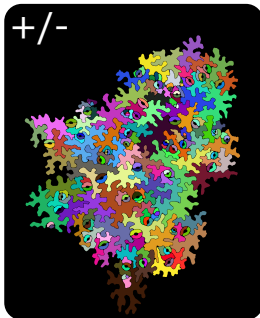

*35S::UBP12\_3.2*

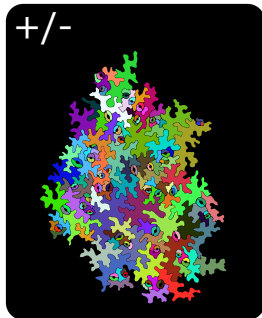

Col-0

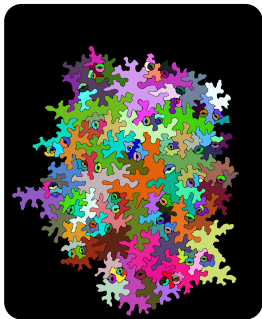

*35S::UBP13\_1.1*

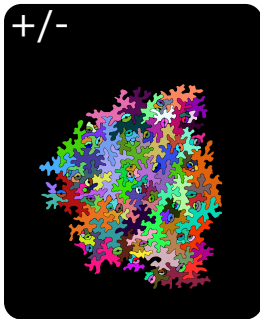

*35S::UBP13\_2.3*

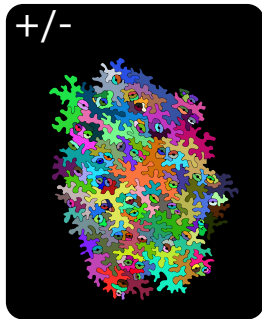

Supplement: supp [file elife-52276-supp-v1.zip]

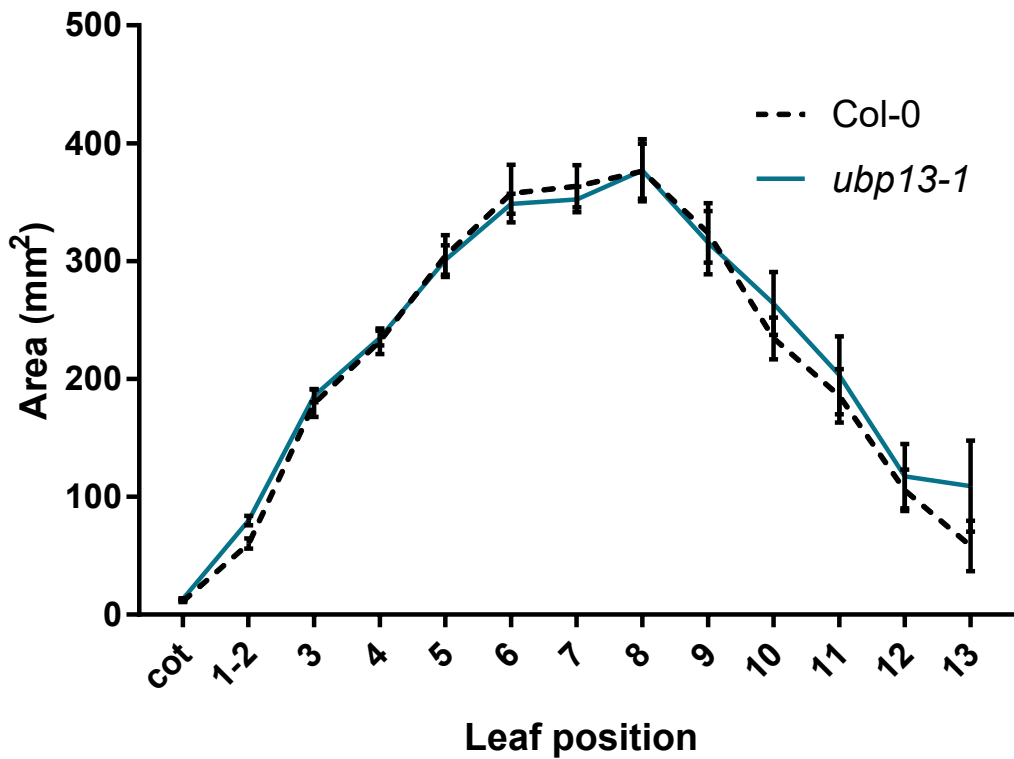

Supplement: supp [file elife-52276-supp-v1.zip]

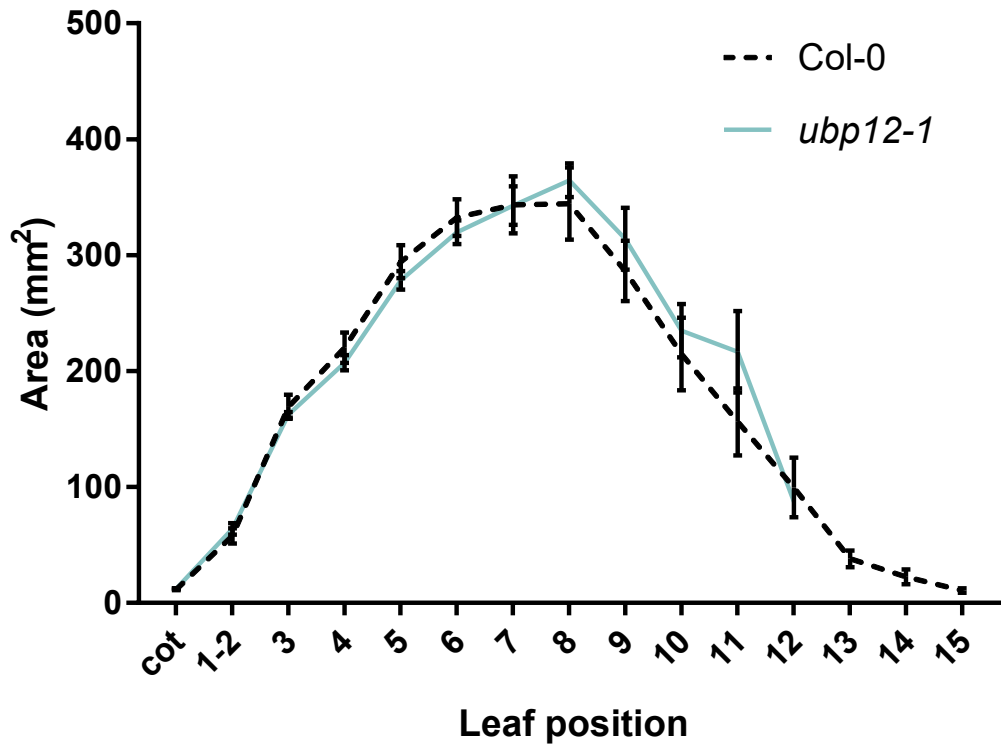

Supplement: supp [file elife-52276-supp-v1.zip]

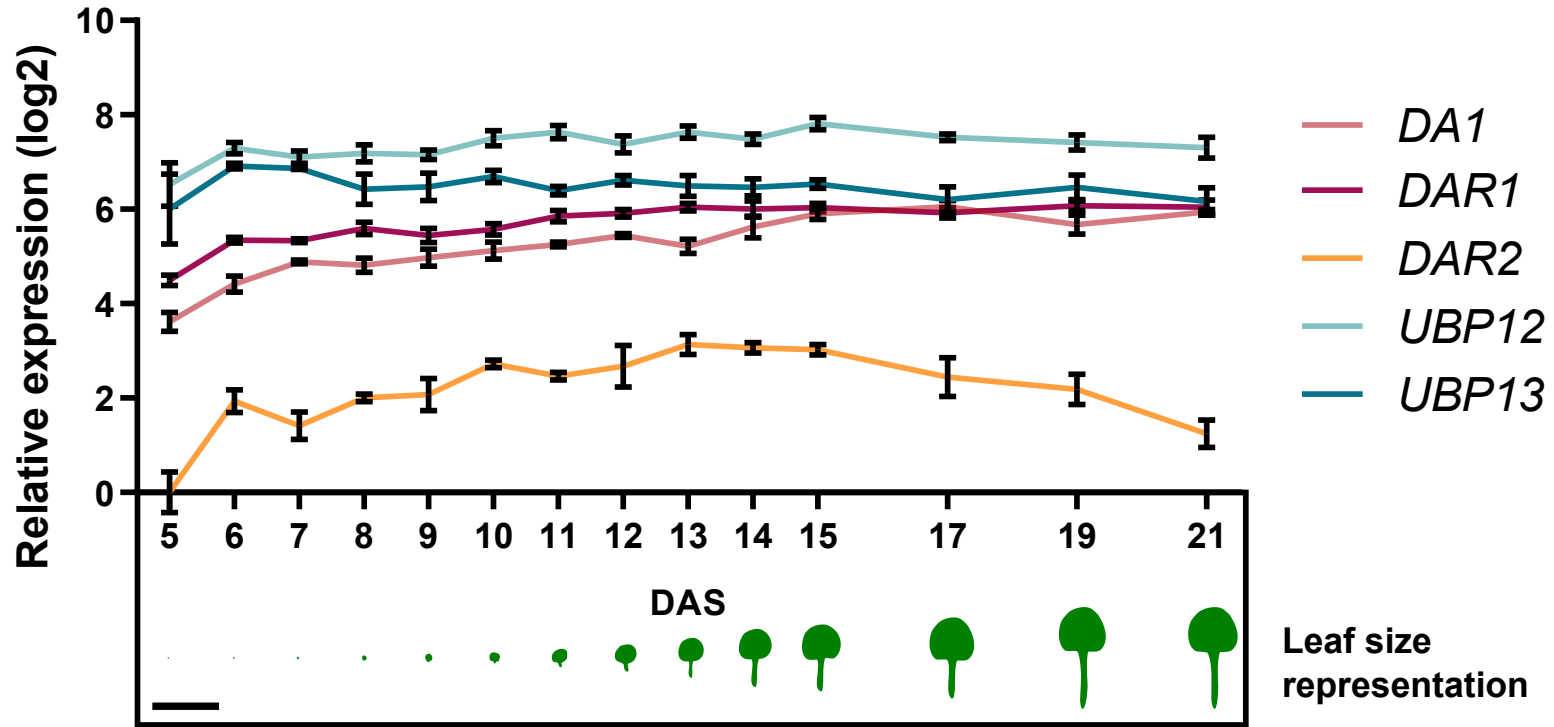

Supplement: supp [file elife-52276-supp-v1.zip]

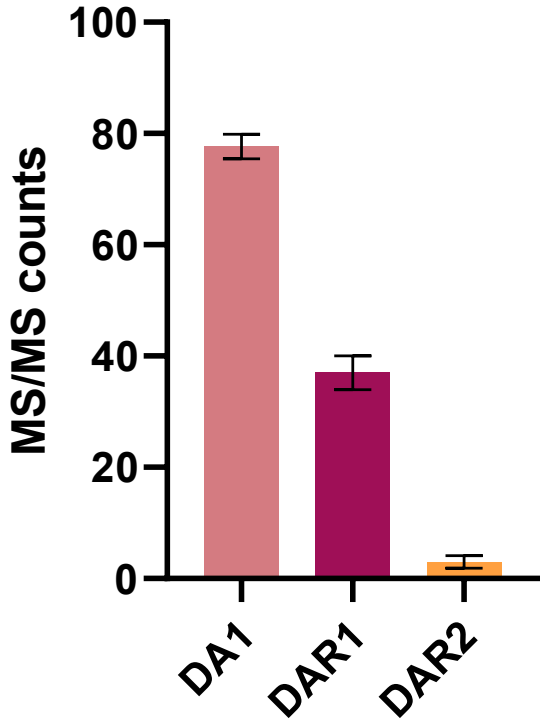

Supplement: supp [file elife-52276-supp-v1.zip]

Day 18

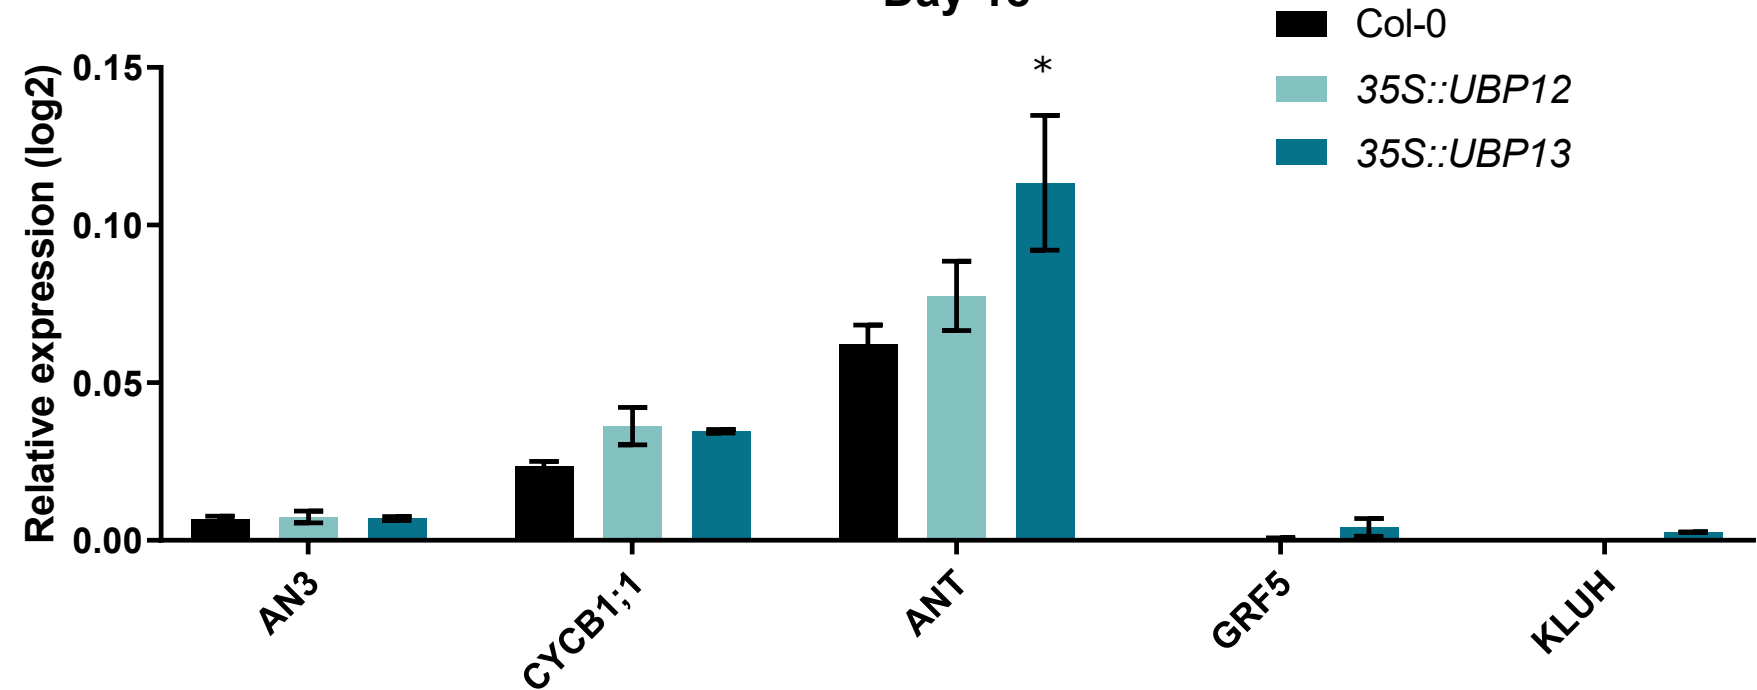

Supplement: supp [file elife-52276-supp-v1.zip]

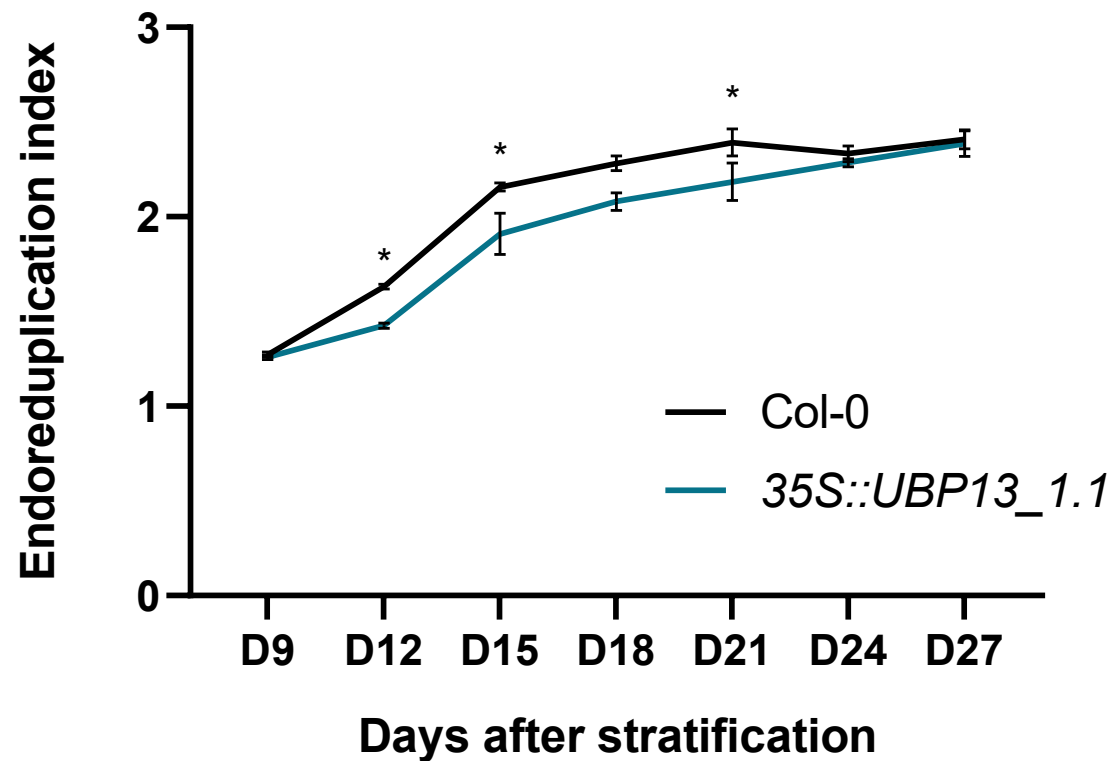

Supplement: supp [file elife-52276-supp-v1.zip]

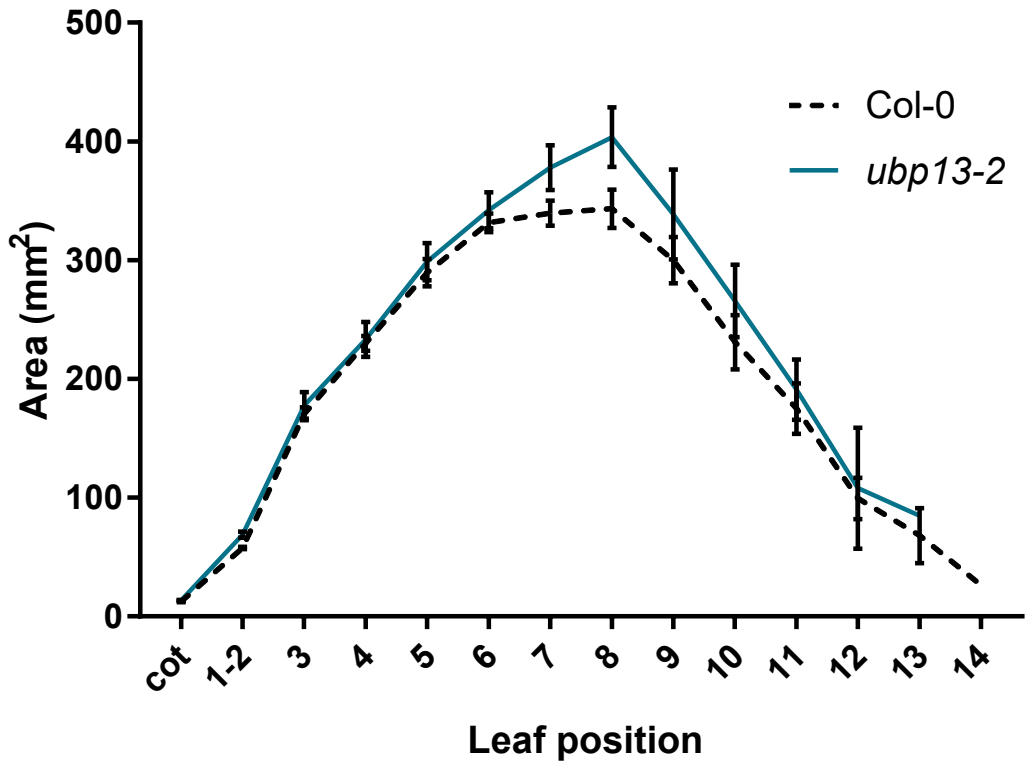

Supplement: supp [file elife-52276-supp-v1.zip]

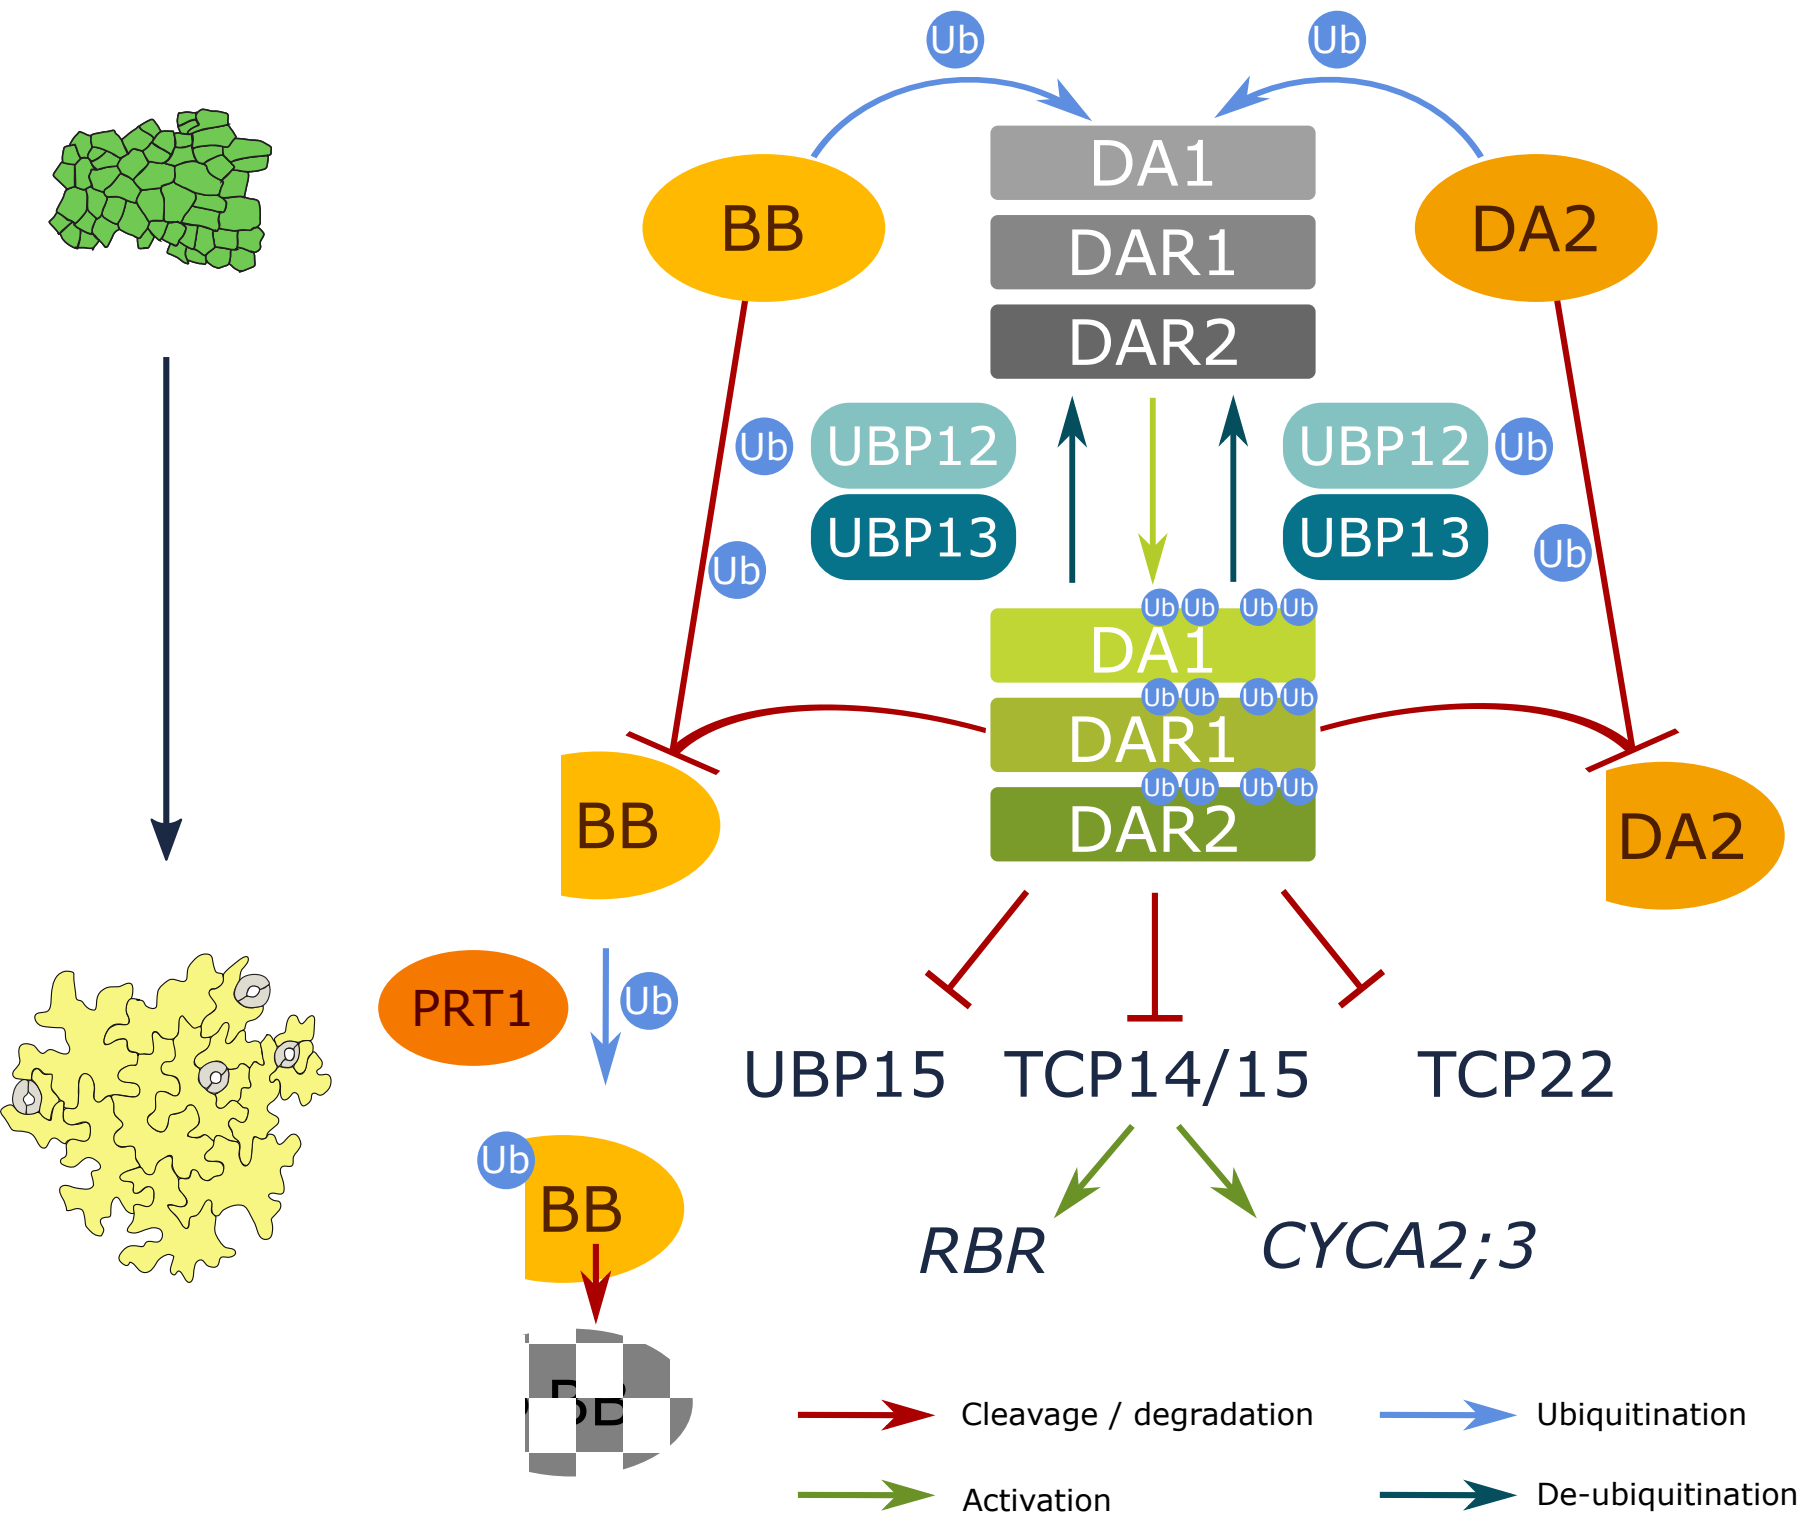

Supplement: supp [file elife-52276-supp-v1.zip]

**Leaf blade index**

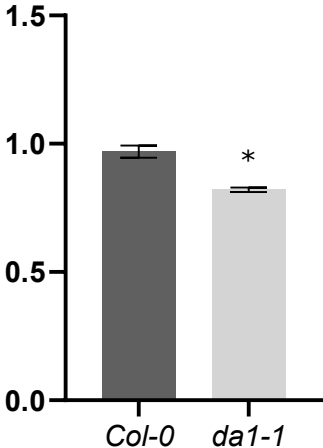

Supplement: supp [file elife-52276-supp-v1.zip]

Col-0

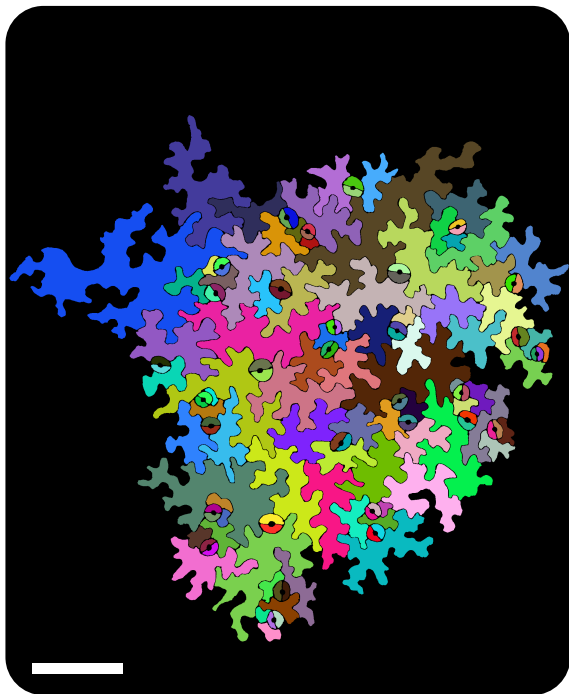

*35S::UBP13\_1.1* (+/+)

+/+

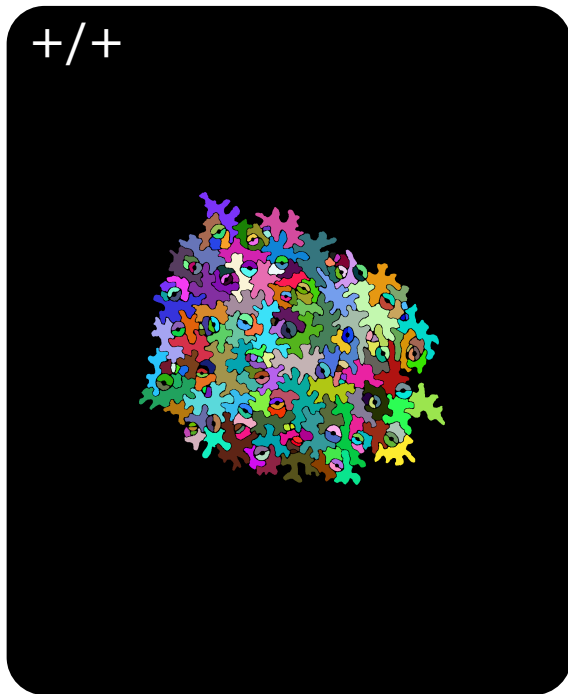

Supplement: supp [file elife-52276-supp-v1.zip]

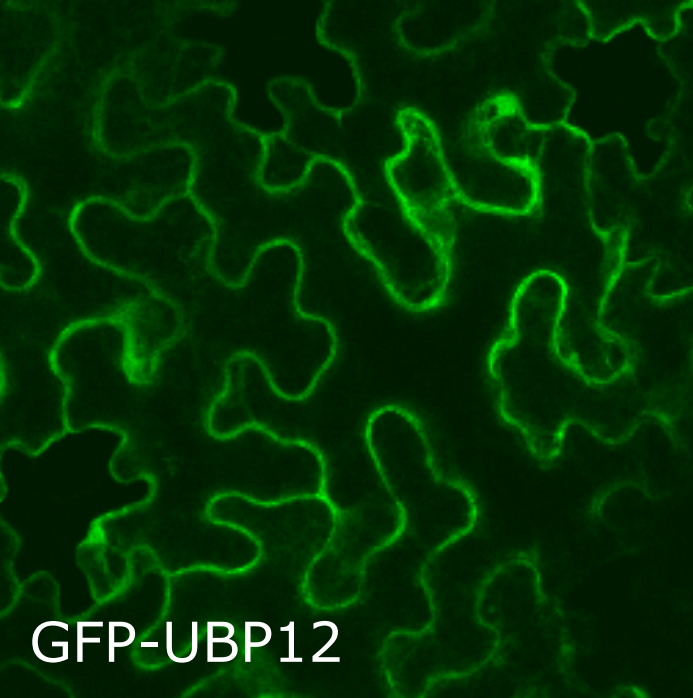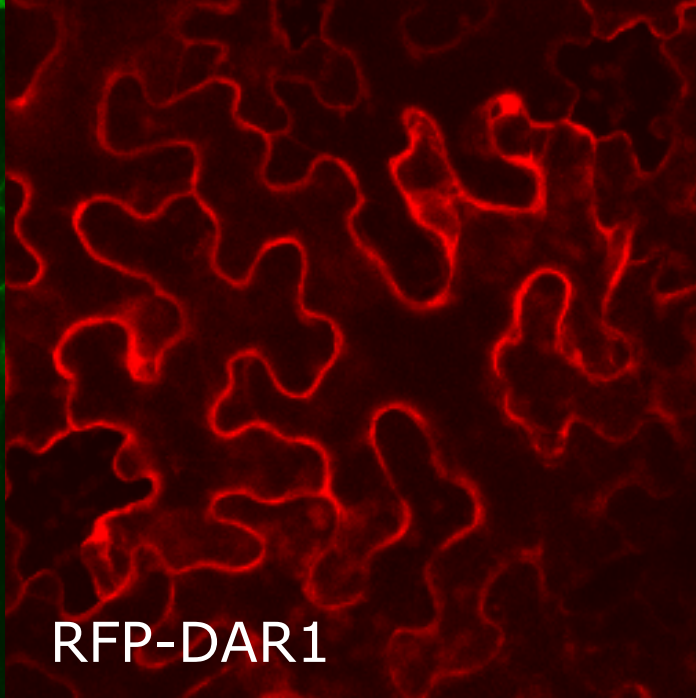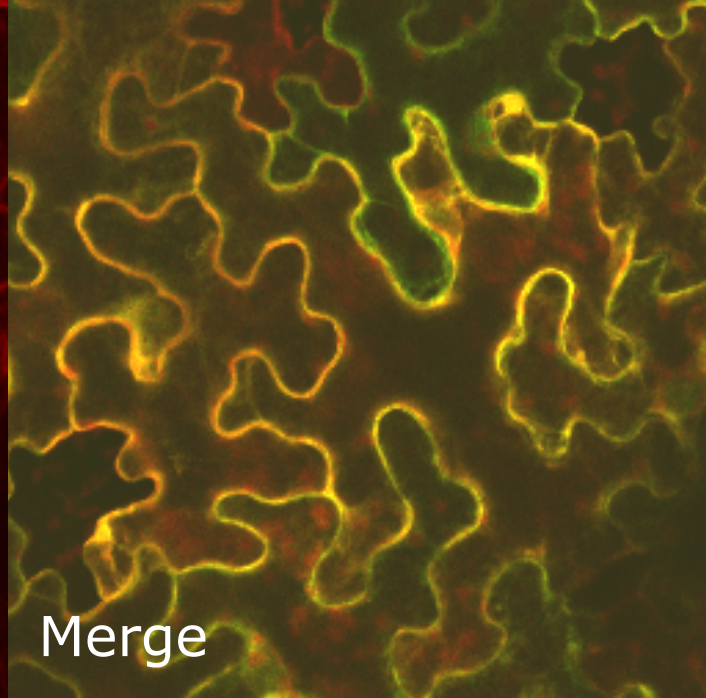

Supplement: supp [file elife-52276-supp-v1.zip]

GFP-DA1

GFP-DAR1

15

12

111

2

2

41

43

GFP-DAR2

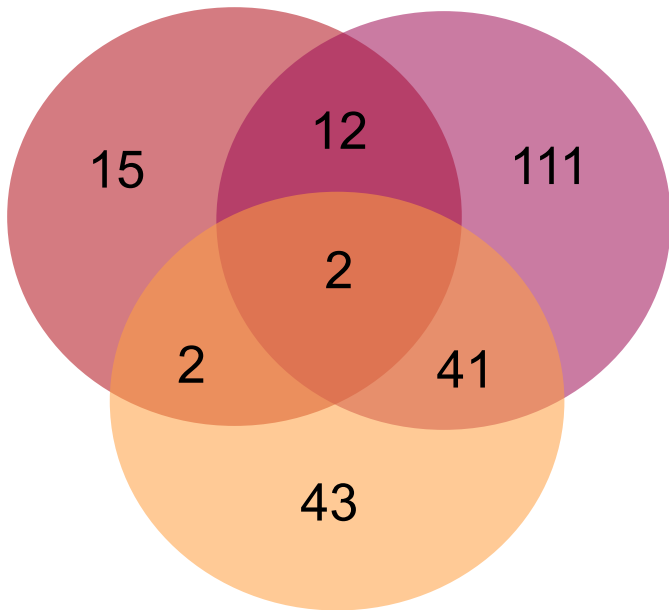

Supplement: supp [file elife-52276-supp-v1.zip]
